# Supplementary material for: Comparison of Experimental Methodologies Based on Bulk-Metagenome and Virus-like Particle Enrichment: Pros and Cons for Representativeness and Reproducibility in the Study of the Fecal Human Virome
Source: MDPI journal article supplement (doi:10.3390/microorganisms12010162), 2024-01-13
Supplement: s1 [file s1]

**Table S2.** Relative abundance of the viral families identified for each sample in the study, used for Figure 3.

| Taxon                                   | 02.1A       | 02.1B       | 02.2A       | 02.2B       | 02.3A       | 02.3B       | 03.1A       | 03.1B       | 03.2A       | 03.2B       | 03.3A       | 03.3B | 05.1A |
|-----------------------------------------|-------------|-------------|-------------|-------------|-------------|-------------|-------------|-------------|-------------|-------------|-------------|-------|-------|
|                                         | 05.1B       | 05.2A       | 05.2B       | 05.3A       | 05.3B       | 06.1A       | 06.1B       | 06.2A       | 06.2B       | 06.3A       | 06.3B       | 07.1A | 07.1B |
|                                         | 07.2A       | 07.2B       | 07.3A       | 07.3B       | 08.1A       | 08.1B       | 08.2A       | 08.2B       | 08.3A       | 08.3B       | 09.1A       | 09.1B | 09.2A |
|                                         | 09.2B       | 09.3A       | 09.3B       | 13.1A       | 13.1B       | 13.2A       | 13.2B       | 13.3A       | 13.3B       | 20.1A       | 20.1B       | 20.2A | 20.2B |
|                                         | 20.3A       | 20.3B       | 22.1A       | 22.1B       | 22.2A       | 22.2B       | 22.3A       | 22.3B       |             |             |             |       |       |
| "Artverviricota;Caulimoviridae"         | 0           | 0           | 0           | 0           | 0           | 0           | 0           | 0           | 0           | 0           | 0           | 0     | 0     |
|                                         | 0           | 0           | 0           | 0           | 0           | 0           | 0           | 0           | 0           | 0           | 0           | 0     | 0     |
|                                         | 8.461538462 | 0           | 0           | 0           | 0           | 0           | 0           | 0.008289812 | 0           | 0           | 0           | 0     | 0     |
|                                         | 0           | 0           | 0           | 0           | 0           | 0           | 0           | 0           | 0           | 0           | 0           | 0     | 0     |
|                                         | 0           | 0           | 0           | 0           | 0           | 0           | 0           | 0           | 0           | 0           | 0           | 0     | 0     |
| "Artverviricota*;Retroviridae"          | 0           | 0           | 0           | 0           | 0           | 0           | 0           | 0           | 0           | 0           | 0           | 0     | 0     |
|                                         | 0           | 0           | 0           | 0           | 0           | 0           | 0           | 0           | 0           | 0           | 0           | 0     | 0     |
|                                         | 0.384615385 | 0           | 0           | 0           | 0           | 0           | 0           | 0           | 0           | 0           | 0           | 0     | 0     |
|                                         | 2.906208719 | 0           | 0           | 0           | 0           | 0           | 0           | 0           | 0           | 0           | 0           | 0     | 0     |
|                                         | 0           | 19.31540342 | 0           | 0           | 0           | 0           | 0           | 0           | 0           | 0           | 0           | 0     | 0     |
|                                         | 0           | 0           |             |             |             |             |             |             |             |             |             |       |       |
| "Cossaviricota;Papillomaviridae"        | 0           | 0           | 0           | 0           | 0           | 0           | 0           | 0           | 0           | 0           | 0           | 0     | 0     |
|                                         | 0           | 0           | 0           | 0           | 0           | 0           | 0           | 0           | 0           | 0           | 0           | 0     | 0     |
|                                         | 1.538461538 | 0           | 0           | 0           | 0           | 0           | 0           | 0.953328359 | 0           | 0           | 0           | 0     | 0     |
|                                         | 0           | 0           | 0           | 0           | 0           | 0           | 0           | 0           | 0           | 0           | 0           | 0     | 0     |
|                                         | 0           | 0           | 0           | 0           | 0           | 0           | 0           | 0           | 0           | 0           | 0           | 0     | 0     |
| "Cossaviricota*;Parvoviridae"           | 0           | 0           | 0           | 0           | 0           | 0           | 0           | 0           | 0           | 0           | 0           | 0     | 0     |
|                                         | 0           | 0           | 0           | 0           | 0           | 0           | 0           | 0           | 0           | 0           | 0           | 0     | 0     |
|                                         | 0           | 0           | 0           | 0           | 0           | 0           | 0           | 0           | 0           | 0           | 0           | 0     | 0     |
|                                         | 4.022988506 | 0           | 0           | 0           | 0           | 0           | 0           | 0           | 0           | 0           | 0           | 0     | 0     |
|                                         | 0           | 0           | 0           | 0           | 0           | 0           | 0           | 0           | 0           | 0           | 0           | 0     | 0     |
| "Cressdnaviricota;Circoviridae"         | 0           | 0           | 0           | 0           | 0           | 0           | 0           | 0           | 0           | 0           | 0           | 0     | 0     |
|                                         | 0           | 0           | 0           | 0           | 0           | 0           | 0           | 0           | 0           | 0           | 0           | 0     | 0     |
|                                         | 0           | 0           | 0           | 0           | 0           | 0           | 0           | 0           | 0           | 0           | 0           | 0     | 0     |
|                                         | 0.574712644 | 0           | 0           | 0           | 0           | 0           | 0           | 0           | 0           | 0           | 0           | 0     | 0     |
|                                         | 0           | 0           | 0           | 0           | 0           | 0           | 0           | 0           | 0           | 0           | 0           | 0     | 0     |
| "Cressdnaviricota;Cressdnaviricota__na" | 0           | 0           | 0           | 0           | 0           | 0           | 0           | 0           | 0           | 0           | 0           | 0     | 0     |
|                                         | 0           | 0           | 0           | 0.534188034 | 0           | 0           | 0           | 0           | 0           | 0           | 0           | 0     | 0     |
|                                         | 0           | 5.747126437 | 0.084317032 | 0           | 0           | 0           | 0           | 0           | 0           | 0           | 0.069348128 |       |       |
|                                         | 0           | 0           | 0           | 0           | 0           | 0           | 0           | 0           | 0           | 0           | 0           | 0     | 0     |
|                                         | 0           | 0           | 0           |             |             |             |             |             |             |             |             |       |       |
| "Cressdnaviricota;Genomoviridae"        | 0           | 0           | 0           | 0           | 0           | 0           | 0           | 0           | 0           | 0           | 0           | 0     | 0     |
|                                         | 0.086956522 | 0           | 0           | 0           | 0           | 0           | 0           | 0           | 0           | 0           | 0           | 0     | 0     |
|                                         | 0           | 0           | 0           | 0           | 0           | 0           | 0           | 0.008289812 | 0           | 0           | 0           | 0     | 0     |
|                                         | 0           | 0           | 0           | 0           | 0           | 0           | 0           | 0           | 0           | 0           | 0           | 0     | 0     |
|                                         | 0           | 0           | 0           | 0           | 0.930232558 | 0           | 0           | 0           | 0           | 0           | 0           | 0     | 0     |
|                                         | 0           |             |             |             |             |             |             |             |             |             |             |       |       |
| "Duplornaviricota;Chrysoviridae"        | 0           | 0           | 0           | 0           | 0           | 0           | 0           | 0           | 0           | 0           | 0           | 0     | 0     |
|                                         | 0           | 0           | 0           | 0           | 0           | 0           | 0           | 0           | 0           | 0           | 0           | 0     | 0     |
|                                         | 0           | 0           | 0           | 0           | 0           | 0           | 0           | 0           | 0           | 0           | 0           | 0     | 0     |
|                                         | 0           | 0           | 0           | 0           | 0           | 0           | 0           | 0           | 0           | 0           | 0           | 0     | 0     |
|                                         | 0           | 0           | 0           | 0           | 0           | 0           | 0           | 0.847457627 | 0           | 0           | 0           | 0     | 0     |
| "Hofneiviricota;Inoviridae"             | 0           | 0           | 0           | 0.130378096 | 0.457456542 | 0           | 0           | 0           | 0           | 0           | 0           | 0     | 0     |
|                                         | 0           | 0           | 0           | 0           | 0.174216028 | 0.165837479 | 0           | 0           | 0           | 0           | 0           | 0     | 0     |
|                                         | 2.559726962 | 3.184713376 | 0           | 0           | 0           | 0.019928258 | 0           | 0           | 0           | 0.213675214 | 0           | 0     | 0     |
|                                         | 0           | 0           | 0           | 0           | 0           | 0           | 0           | 0           | 0           | 0           | 0           | 0     | 0     |
|                                         | 0           | 0           | 0           | 0.069348128 | 0           | 0           | 0           | 0           | 0.199004975 | 0.99009901  |             |       |       |
|                                         | 3.092783505 | 2.325581395 | 0           | 0           | 0           | 0           | 0.762195122 | 0           | 0           | 0           | 0           | 0     | 0     |
| "Kitrinoviricota;Virgaviridae"          | 0           | 0           | 0           | 5.747126437 | 38.52173913 | 96.02577873 | 0           | 0           | 0           | 0           | 0           | 0     | 0     |

|                                      |             |             |             |             |             |             |             |             |   |             |
|--------------------------------------|-------------|-------------|-------------|-------------|-------------|-------------|-------------|-------------|---|-------------|
|                                      | 0           | 0           | 0           | 0           | 16.66666667 | 0           | 0.039856517 | 0.384615385 | 0 | 0           |
|                                      | 2.272727273 | 1.19047619  | 0           | 0.033159247 | 0           | 0           | 0           | 0           | 0 | 0           |
|                                      | 0           | 0           | 0           | 0           | 14.83979764 | 0.262123198 | 0           | 0           | 0 | 0           |
|                                      | 23.47188264 | 0           | 0           | 0           | 0           | 0           | 0           | 0           | 0 | 1.694915254 |
|                                      | 0           | 0           |             |             |             |             |             |             |   |             |
| "Kitrinoviricota;Alphaflexiviridae"  | 0           | 0           | 0           | 0           | 0           | 0           | 0           | 0           | 0 | 0           |
|                                      | 0.086956522 | 0.161117078 | 0           | 0           | 7.326732673 | 1.333333333 | 13.67521368 | 51          |   |             |
|                                      | 0           | 0           | 0           | 0           | 0           | 0           | 1.19047619  | 0           |   |             |
|                                      | 0.033159247 | 0           | 0           | 0           | 0           | 0           | 0           | 0           | 0 |             |
|                                      | 18.04384486 | 0           | 0           | 0           | 0           | 0           | 0           | 0           | 0 | 0           |
|                                      | 0           | 0           | 0           | 0           | 0           | 4.516129032 | 0           |             |   |             |
| "Kitrinoviricota;Betaflexiviridae"   | 0           | 0           | 0           | 0           | 0           | 0           | 0           | 0           | 0 | 0           |
|                                      | 0           | 0           | 0           | 0           | 0           | 0           | 0           | 0           | 0 | 0           |
|                                      | 0           | 0           | 0           | 0           | 0           | 0           | 0           | 0           | 0 | 0           |
|                                      | 0           | 0           | 0           | 0           | 0           | 0           | 0           | 0           | 0 | 0           |
|                                      | 0           | 2.06185567  | 0.465116279 | 0           | 0           | 0           | 0           | 0           | 0 | 0           |
| "Kitrinoviricota;Tymovirales__na"    | 0           | 0           | 0           | 0           | 0           | 0           | 0           | 0           | 0 | 0           |
|                                      | 0           | 0           | 0           | 0           | 0.396039604 | 0           | 0           | 0           | 0 | 0           |
|                                      | 0           | 0           | 0           | 0           | 0           | 0           | 0           | 0           | 0 | 0           |
|                                      | 0           | 0           | 0           | 0           | 0           | 0           | 0           | 0           | 0 | 0           |
|                                      | 0           | 0           | 0           | 0           | 0           | 0           | 0           | 0           | 0 | 0           |
| "Kitrinoviricota;Tymovirales__uc"    | 0           | 0           | 0           | 0           | 0           | 0           | 0           | 0           | 0 | 0           |
|                                      | 0           | 0.026852846 | 0           | 0           | 0           | 7.081807082 | 31          | 0           | 0 | 0           |
|                                      | 0           | 0           | 0           | 0           | 0           | 0           | 0.074608306 | 0           | 0 | 0           |
|                                      | 0           | 0           | 0           | 0           | 0           | 0           | 5.564924115 | 0           | 0 | 0           |
|                                      | 0           | 2.173913043 | 0           | 0           | 0           | 0           | 0           | 0           | 0 | 0           |
|                                      | 0           | 1.935483871 | 0           |             |             |             |             |             |   |             |
| "Kitrinoviricota;Flaviviridae"       | 0           | 0           | 0           | 0           | 0           | 0           | 0           | 0           | 0 | 0           |
|                                      | 0           | 0           | 0           | 0           | 0           | 0           | 0           | 0           | 0 | 0           |
|                                      | 0.384615385 | 0           | 0           | 0           | 0           | 0           | 0           | 0           | 0 |             |
|                                      | 0.616468516 | 0           | 0           | 0           | 0           | 0           | 0           | 0           | 0 | 0           |
|                                      | 0           | 0           | 0           | 0           | 0           | 0           | 0           | 0           | 0 | 0           |
|                                      | 0           |             |             |             |             |             |             |             |   |             |
| "Lenarviricota;Mitoviridae"          | 0           | 0           | 0           | 0           | 0           | 0           | 0           | 0           | 0 | 0           |
|                                      | 0           | 0           | 0           | 0           | 0           | 0           | 0           | 0           | 0 | 0           |
|                                      | 0           | 0           | 0           | 0.757575758 | 0           | 0           | 0           | 0           | 0 | 0           |
|                                      | 0           | 0           | 0           | 0.223214286 | 0           | 0           | 0           | 0           | 0 | 0           |
|                                      | 0           | 0           | 0           | 0           | 0           | 0           | 0           | 0           | 0 | 0           |
| "Negarnaviricota;Orthomyxoviridae"   | 0           | 0           | 0           | 0           | 0           | 0           | 0           | 0           | 0 | 0           |
|                                      | 0           | 0           | 0           | 0           | 0           | 0           | 0           | 0           | 0 | 0           |
|                                      | 0           | 0           | 0           | 0           | 0           | 0           | 0.008289812 | 0           | 0 | 0           |
|                                      | 0.616468516 | 0           | 0           | 0           | 0           | 0           | 0           | 0           | 0 | 0           |
|                                      | 0           | 0           | 0           | 0           | 0           | 0           | 0           | 0           | 0 | 0           |
|                                      | 0.64516129  | 0           |             |             |             |             |             |             |   |             |
| "Negarnaviricota;Pneumoviridae"      | 0           | 0           | 0           | 0           | 0           | 0           | 0           | 0           | 0 | 0           |
|                                      | 0           | 0           | 0           | 0           | 0           | 0           | 0           | 0           | 0 | 0           |
|                                      | 0           | 0           | 0           | 0           | 0           | 0           | 0           | 0           | 0 | 0           |
|                                      | 0           | 0           | 0           | 0           | 0           | 0           | 0           | 0           | 0 |             |
|                                      | 0.298507463 | 0           | 0           | 0           | 0           | 0           | 0           | 0           | 0 | 0           |
| "Nucleocytoviricota;Phycodnaviridae" | 0           | 0           | 0           | 0           | 0           | 0           | 0.032226877 | 0           | 0 | 0           |
|                                      | 0           | 0           | 0           | 0           | 0           | 0           | 0           | 0           | 0 | 0           |
|                                      | 0           | 0           | 0           | 0           | 0           | 0           | 0.024869435 | 0           | 0 | 0           |
|                                      | 0           | 0           | 4.022988506 | 0           | 0           | 0           | 0           | 0           | 0 | 0           |
|                                      | 0           | 0           | 0           | 0           | 0           | 1.030927835 | 0           | 0           |   |             |

|                                       |             |             |             |             |             |             |             |             |             |             |   |   |
|---------------------------------------|-------------|-------------|-------------|-------------|-------------|-------------|-------------|-------------|-------------|-------------|---|---|
| 0                                     | 0           | 0           | 0           | 0           | 0           | 0.098425197 | 0           | 0           | 0           | 0           | 0 | 0 |
| 0                                     | 0           | 0           | 0           | 0           | 0           | 0           | 0           | 0           | 0           | 0           | 0 | 0 |
| "Nucleocytoviricota;Iridoviridae"     | 0           | 0           | 0           | 0           | 0           | 0           | 0.030759766 | 0           | 0           | 0           | 0 | 0 |
| 0                                     | 0           | 0           | 0           | 0           | 0           | 0           | 0           | 0           | 0           | 0           | 0 | 0 |
| 0                                     | 1.923076923 | 0           | 0           | 0           | 0           | 0           | 0           | 0           | 0           | 0           | 0 | 0 |
| 0                                     | 0.574712644 | 0           | 0           | 0           | 0           | 0           | 0           | 0           | 0           | 0           | 0 | 0 |
| 0                                     | 0           | 0           | 0           | 0           | 0           | 0           | 0           | 0           | 0           | 0           | 0 | 0 |
| 0                                     |             |             |             |             |             |             |             |             |             |             |   |   |
| "Nucleocytoviricota;Marseilleviridae" | 0           | 0           | 0           | 0           | 0           | 0           | 0           | 0           | 0           | 0           | 0 | 0 |
| 0                                     | 0           | 0           | 0           | 0           | 0           | 0           | 0           | 0           | 0           | 0           | 0 | 0 |
| 0                                     | 0           | 0           | 0           | 0           | 0           | 0           | 0           | 0           | 0           | 0           | 0 | 0 |
| 3.448275862                           | 0           | 0           | 0           | 0           | 0           | 0           | 0.02621232  | 0           | 0           | 0           | 0 | 0 |
| 0                                     | 0           | 0           | 0           | 0           | 0           | 0           | 0           | 0           | 0           | 0           | 0 | 0 |
| 0                                     |             |             |             |             |             |             |             |             |             |             |   |   |
| "Nucleocytoviricota;Poxviridae"       | 0           | 0           | 0           | 0           | 0           | 0           | 0           | 0           | 0           | 0           | 0 | 0 |
| 0                                     | 0           | 0           | 0           | 0           | 0           | 0           | 0           | 0           | 0           | 0           | 0 | 0 |
| 0                                     | 0           | 0           | 0           | 0           | 0           | 0.008289812 | 0           | 0           | 0           | 0           | 0 | 0 |
| 0                                     | 0           | 0           | 0           | 0           | 0           | 0           | 0           | 0           | 0           | 0           | 0 | 0 |
| 0                                     | 0           | 0           | 0           | 0           | 0           | 0           | 0           | 0           | 0           | 0           | 0 | 0 |
| "Phixviricota;Microviridae"           | 1.303780965 | 1.0978957   | 5.681396212 | 6.658184902 | 23.71577976 |             |             |             |             |             |   |   |
| 0.515630035                           | 1.048218029 | 0.273972603 | 5.785123967 | 3.448275862 | 2.434782609 |             |             |             |             |             |   |   |
| 0.37593985                            | 2.090592334 | 1.824212272 | 1.98019802  | 0           | 0.366300366 | 2           | 0           |             |             |             |   |   |
| 0.318471338                           | 0           | 0.139497808 | 0           | 0.668576886 | 0.427350427 | 3.03030303  |             |             |             |             |   |   |
| 1.19047619                            | 0           | 0.008289812 | 0.140449438 | 0.579374276 | 0.236183278 | 0.657894737 |             |             |             |             |   |   |
| 0                                     | 5.172413793 | 0.084317032 | 0.455927052 | 0           | 0           | 1.517706577 | 0.471821756 |             |             |             |   |   |
| 1.57480315                            | 0.970873786 | 8.823529412 | 0           | 0           | 0           | 0.646766169 | 0.792079208 |             |             |             |   |   |
| 6.18556701                            | 7.906976744 | 8.333333333 | 0           | 1.910219675 | 1.219512195 | 20.83333333 |             |             |             |             |   |   |
| 1.694915254                           | 2.580645161 | 0           |             |             |             |             |             |             |             |             |   |   |
| "Pisuviricota*;Partitiviridae"        | 0           | 0           | 0           | 0           | 0           | 0           | 0           | 0           | 0           | 0           | 0 | 0 |
| 0                                     | 0           | 0           | 0           | 0           | 0           | 0           | 0           | 0           | 0           | 0           | 0 | 0 |
| 0                                     | 0           | 0           | 0           | 0           | 0           | 0           | 0           | 0           | 0           | 0           | 0 | 0 |
| 0                                     | 0           | 0           | 0           | 0           | 0           | 0           | 0           | 0           | 0           | 0           | 0 | 0 |
| 0                                     | 0           | 0           | 0           | 0           | 0           | 0           | 0.847457627 | 0           | 0           |             |   |   |
| "Pisuviricota*;Picobirnaviridae"      | 0           | 0           | 47.34496844 | 44.99575912 | 2.799138727 | 0.032226877 |             |             |             |             |   |   |
| 0                                     | 0           | 0           | 0           | 0           | 0           | 0           | 0           | 0           | 0           | 0           | 0 | 0 |
| 0                                     | 1.666666667 | 0           | 0           | 0           | 0           | 0           | 8.333333333 | 9.523809524 | 0           |             |   |   |
| 0                                     | 0           | 0           | 0           | 0           | 0           | 0           | 0           | 17.41071429 | 20.75471698 |             |   |   |
| 1.180438449                           | 0           | 0           | 0           | 14.70588235 | 29.41176471 | 8.695652174 | 0           | 0           |             |             |   |   |
| 0                                     | 0           | 0           | 0           | 0           | 0           | 2.580645161 | 0           |             |             |             |   |   |
| "Pisuviricota;Coronaviridae"          | 0           | 0           | 0           | 0           | 0           | 0           | 0           | 0           | 0           | 0           | 0 | 0 |
| 0                                     | 0           | 0           | 0           | 0           | 0           | 0           | 0           | 0           | 0           | 0           | 0 | 0 |
| 0                                     | 0           | 0           | 0           | 0           | 0           | 0           | 0           | 0.094473311 | 0           |             |   |   |
| 0.528401585                           | 0           | 0           | 0           | 0           | 0           | 0           | 0           | 0           | 0           | 0           | 0 | 0 |
| 0                                     | 0           | 0           | 0           | 0           | 0           | 0           | 0           | 0           | 0           | 0           | 0 | 0 |
| 0                                     |             |             |             |             |             |             |             |             |             |             |   |   |
| "Pisuviricota;Picornaviridae"         | 0           | 0           | 0           | 0.042408821 | 0           | 0           | 0           | 0           | 0           | 0           | 0 | 0 |
| 0                                     | 0           | 0           | 0           | 0           | 0           | 0           | 0           | 0           | 0           | 8.333333333 |   |   |
| 14.28571429                           | 0.039856517 | 0.384615385 | 0           | 0           | 0           | 0.757575758 | 7.142857143 | 0           |             |             |   |   |
| 0                                     | 0           | 0           | 0           | 0           | 0           | 0           | 0           | 0           | 0           | 0           | 0 | 0 |
| 0                                     | 0           | 2.941176471 | 5.882352941 | 0           | 0           | 0           | 0           | 0           | 0           | 0           | 0 | 0 |
| 0                                     | 0           | 0           | 0           | 0           | 0           | 0           |             |             |             |             |   |   |
| "Pisuviricota;Solemoviridae"          | 0           | 0           | 0           | 0.042408821 | 0           | 0           | 0           | 0           | 0           | 0           | 0 | 0 |
| 8.26446281                            | 11.49425287 | 0           | 0           | 0           | 0           | 0           | 0           | 0           | 0           | 0           | 0 | 0 |
| 0                                     | 0           | 0           | 0           | 0           | 0           | 0           | 0           | 0           | 0           | 0           | 0 | 0 |
| 0                                     | 0           | 0           | 0           | 0           | 0           | 0           | 0           | 0           | 0           | 0           | 0 | 0 |
| 0                                     | 0           | 0           | 0           | 0           | 0           | 0           | 0           | 0           | 0           | 0           | 0 | 0 |
| 0                                     | 0           |             |             |             |             |             |             |             |             |             |   |   |
| "Pisuviricota;Astroviridae"           | 0           | 0           | 0.074266617 | 0.042408821 | 0.030759766 | 0.032226877 |             |             |             |             |   |   |
| 0                                     | 0           | 0.826446281 | 0           | 0           | 0           | 0           | 0           | 0           | 1.333333333 |             |   |   |

[illegible]



|                                       |             |             |             |             |             |             |             |   |   |   |            |   |
|---------------------------------------|-------------|-------------|-------------|-------------|-------------|-------------|-------------|---|---|---|------------|---|
| "Uroviricota;Zobellviridae"           | 0           | 0           | 0           | 0           | 0           | 0           | 0           | 0 | 0 | 0 | 0          | 0 |
| 0                                     | 0.026852846 | 0           | 0           | 0           | 0           | 0           | 0           | 0 | 0 | 0 | 0          | 0 |
| 0.019928258                           | 0           | 0           | 0           | 0           | 0           | 0           | 0           | 0 | 0 | 0 | 0          | 0 |
| 0                                     | 0           | 0           | 0           | 0           | 0           | 0           | 0           | 0 | 0 | 0 | 0          | 0 |
| 0                                     | 0           | 0           | 0           | 0           | 0           | 0           | 0           | 0 | 0 | 0 | 0.64516129 |   |
| 0                                     |             |             |             |             |             |             |             |   |   |   |            |   |
| "Uroviricota;Crassvirales__na"        | 0.130378096 | 0.274473925 | 0.556999629 | 0.254452926 | 0.184558597 |             |             |   |   |   |            |   |
| 0.708991299                           | 2.51572327  | 4.657534247 | 3.305785124 | 4.597701149 | 2           | 0.080558539 |             |   |   |   |            |   |
| 0                                     | 0.331674959 | 0           | 0           | 4.151404151 | 0           | 0.170648464 | 0.159235669 | 0 |   |   |            |   |
| 0                                     | 0.019928258 | 0           | 0           | 0.213675214 | 0.757575758 | 0           | 0           | 0 | 0 | 0 |            |   |
| 0.347624565                           | 0.047236656 | 0           | 0           | 0           | 2.023608769 | 0.911854103 | 2.232142857 |   |   |   |            |   |
| 0                                     | 0.168634064 | 0.262123198 | 0.098425197 | 0.138696255 | 0           | 0           | 4.347826087 |   |   |   |            |   |
| 0                                     | 0           | 0           | 0           | 0           | 3.820439351 | 3.048780488 | 0           | 0 |   |   |            |   |
| 0                                     | 0           |             |             |             |             |             |             |   |   |   |            |   |
| "Uroviricota;Crevaviridae"            | 0.260756193 | 0           | 0.482733012 | 0.212044105 | 0.030759766 |             |             |   |   |   |            |   |
| 0.290041895                           | 0.419287212 | 0.136986301 | 1.652892562 | 0           | 0           | 0.026852846 | 0           |   |   |   |            |   |
| 0                                     | 0           | 0           | 0           | 0           | 0           | 0           | 0.095510984 |   |   |   |            |   |
| 0.106837607                           | 0.757575758 | 0           | 0           | 0           | 0           | 0.219298246 | 0           |   |   |   |            |   |
| 0                                     | 13.32209106 | 6.534954407 | 9.151785714 | 0           | 0.337268128 | 0           | 0.098425197 |   |   |   |            |   |
| 0.346740638                           | 0           | 0           | 15.2173913  | 0           | 0           | 0           | 0           | 0 | 0 |   |            |   |
| 0                                     | 0           | 0           | 0           | 0.64516129  | 0           |             |             |   |   |   |            |   |
| "Uroviricota;Intestiviridae"          | 0.130378096 | 0           | 0.222799851 | 0.084817642 | 0           | 0           |             |   |   |   |            |   |
| 2.725366876                           | 10.82191781 | 29.75206612 | 24.13793103 | 0.956521739 | 0           | 0.174216028 |             |   |   |   |            |   |
| 2.819237148                           | 21.18811881 | 16          | 6.105006105 | 0           | 0.341296928 | 0           | 0           | 0 |   |   |            |   |
| 0.398565165                           | 0           | 0           | 0.427350427 | 0           | 0           | 0.699300699 | 0           | 0 | 0 |   |            |   |
| 0                                     | 0           | 0           | 32.8836425  | 13.82978723 | 37.05357143 | 7.547169811 |             |   |   |   |            |   |
| 0.674536256                           | 0.419397117 | 0.196850394 | 0           | 0           | 0           | 2.173913043 | 0           | 0 |   |   |            |   |
| 0                                     | 0           | 0           | 1.111111111 | 13.18051576 | 13.64329268 | 0           | 0.847457627 |   |   |   |            |   |
| 10.32258065                           | 0           |             |             |             |             |             |             |   |   |   |            |   |
| "Uroviricota;Steigviridae"0           | 0           | 0.111399926 | 0.084817642 | 0.061519532 | 0.354495649 | 0           |             |   |   |   |            |   |
| 0                                     | 0           | 0           | 0           | 0.99009901  | 0           | 0.366300366 | 0           |   |   |   |            |   |
| 0                                     | 0           | 0           | 0           | 0.859598854 | 0.534188034 | 0           | 0           |   |   |   |            |   |
| 0.699300699                           | 0           | 0           | 0.75578649  | 0.877192982 | 0           | 0.574712644 | 0           |   |   |   |            |   |
| 0                                     | 0           | 0           | 0.168634064 | 0           | 0           | 0           | 0           | 0 | 0 |   |            |   |
| 0                                     | 0           | 0           | 0           | 0           | 0           | 0           | 0           | 0 | 0 |   |            |   |
| "Uroviricota;Suoliviridae"4.302477184 | 3.568161025 | 22.53991831 | 23.07039864 | 18.60965857 |             |             |             |   |   |   |            |   |
| 43.08733484                           | 0.209643606 | 0.273972603 | 7.438016529 | 4.597701149 | 0.956521739 | 0           |             |   |   |   |            |   |
| 0                                     | 0           | 0           | 0           | 0.170648464 | 0.159235669 | 1.666666667 | 0           |   |   |   |            |   |
| 0.318852132                           | 0           | 1.146131805 | 3.739316239 | 12.12121212 | 2.380952381 | 2.797202797 |             |   |   |   |            |   |
| 0.315012849                           | 0           | 0.115874855 | 0.850259802 | 0           | 0           | 7.504215852 |             |   |   |   |            |   |
| 3.951367781                           | 10.71428571 | 1.886792453 | 3.541315346 | 0.262123198 | 0.295275591 |             |             |   |   |   |            |   |
| 0.416088766                           | 0           | 0           | 4.347826087 | 0           | 0.198019802 | 0           | 0           | 0 |   |   |            |   |
| 0                                     | 1.432664756 | 0.914634146 | 4.166666667 | 0           | 10.32258065 | 0           |             |   |   |   |            |   |
| "Viruses__na;Baculoviridae"           | 0           | 0           | 0           | 0           | 0           | 0           | 0           | 0 | 0 | 0 | 0          | 0 |
| 0                                     | 0           | 0           | 0           | 0           | 0           | 0           | 0           | 0 | 0 | 0 | 0          | 0 |
| 0                                     | 0           | 0           | 0           | 0           | 0           | 0           | 0           | 0 | 0 | 0 | 0          | 0 |
| 0                                     | 0           | 0           | 0           | 0           | 0           | 0           | 0           | 0 | 0 | 0 | 0          | 0 |
| 0                                     | 0           | 0           | 0           | 0           | 0           | 0           | 0.64516129  | 0 |   |   |            |   |
| "Viruses__na;Nimaviridae"             | 0           | 0           | 0           | 0           | 0           | 0           | 0           | 0 | 0 | 0 | 0          | 0 |
| 0                                     | 0           | 0           | 0           | 0           | 0           | 0           | 0           | 0 | 0 | 0 | 0          | 0 |
| 0.384615385                           | 0           | 0           | 0           | 0           | 0           | 0           | 0           | 0 | 0 | 0 | 0          | 0 |
| 0                                     | 0           | 0           | 0           | 0           | 0           | 0           | 0           | 0 | 0 | 0 | 0          | 0 |
| 0                                     | 0           | 0           | 0           | 0           | 0           | 0           | 0           | 0 | 0 | 0 | 0          | 0 |
| "Viruses__na;Anelloviridae"           | 0           | 0           | 0           | 0           | 0           | 0           | 0           | 0 | 0 | 0 | 0          | 0 |
| 0.086956522                           | 0           | 0           | 0           | 0           | 0.244200244 | 1           | 0           | 0 | 0 | 0 | 0          | 0 |
| 1.666666667                           | 0           | 0.079713033 | 5.769230769 | 0           | 0.106837607 | 0           | 0           | 0 | 0 | 0 | 0          | 0 |
| 0.18237586                            | 0           | 0           | 1.133679735 | 8.114035088 | 64.55306033 | 0           | 0           | 0 | 0 | 0 | 0          | 0 |
| 0                                     | 0           | 0.168634064 | 0.05242464  | 0           | 0           | 0           | 0           | 0 | 0 | 0 | 0          | 0 |
