# Supplementary material for: Comparison of Experimental Methodologies Based on Bulk-Metagenome and Virus-like Particle Enrichment: Pros and Cons for Representativeness and Reproducibility in the Study of the Fecal Human Virome
Source: MDPI journal article supplement (doi:10.3390/microorganisms12010162), 2024-01-13
Supplement: s1 [file s1]

| TAXONOMY                                                                                                               | CN_1A   | CN_1B | CN_2A   | CN_2B | CN_3A   | CN_3B | CN_PCR3A |       | CN_PCR3B |       | CN_RT2A |       |       |
|------------------------------------------------------------------------------------------------------------------------|---------|-------|---------|-------|---------|-------|----------|-------|----------|-------|---------|-------|-------|
|                                                                                                                        | CN_RT2B |       | CN_RT3A |       | CN_RT3B |       | 02.1A    | 02.1B | 02.2A    | 02.2B | 02.3A   | 02.3B | 03.1A |
| 03.1B                                                                                                                  | 03.2A   | 03.2B | 03.3A   | 03.3B | 05.1A   | 05.1B | 05.2A    | 05.2B | 05.3A    | 05.3B | 06.1A   | 06.1B |       |
| 06.2A                                                                                                                  | 06.2B   | 06.3A | 06.3B   | 07.1A | 07.1B   | 07.2A | 07.2B    | 07.3A | 07.3B    | 08.1A | 08.1B   | 08.2A |       |
| 08.2B                                                                                                                  | 08.3A   | 08.3B | 09.1A   | 09.1B | 09.2A   | 09.2B | 09.3A    | 09.3B | 13.1A    | 13.1B | 13.2A   | 13.2B |       |
| 13.3A                                                                                                                  | 13.3B   | 20.1A | 20.1B   | 20.2A | 20.2B   | 20.3A | 20.3B    | 22.1A | 22.1B    | 22.2A | 22.2B   | 22.3A |       |
| 22.3B                                                                                                                  |         |       |         |       |         |       |          |       |          |       |         |       |       |
| "Viruses;Artverviricota;Revtraviricetes;Ortervirates;Caulimoviridae;Badnavirus;Aglaonema_bacilliform_virus"            |         |       |         |       |         |       |          |       |          |       |         |       |       |
| 0                                                                                                                      | 0       | 0     | 0       | 0     | 0       | 0     | 0        | 0     | 0        | 0     | 0       | 0     | 0     |
| 0                                                                                                                      | 0       | 0     | 0       | 0     | 0       | 0     | 0        | 0     | 0        | 0     | 0       | 0     | 0     |
| 0                                                                                                                      | 0       | 0     | 0       | 0     | 0       | 0     | 0        | 0     | 5        | 0     | 0       | 0     | 0     |
| 0                                                                                                                      | 0       | 0     | 0       | 0     | 0       | 0     | 0        | 0     | 0        | 0     | 0       | 0     | 0     |
| 0                                                                                                                      | 0       | 0     | 0       | 0     | 0       | 0     | 0        | 0     | 0        | 0     | 0       | 0     | 0     |
| 0                                                                                                                      | 0       | 0     | 0       | 0     | 0       | 0     |          |       |          |       |         |       |       |
| "Viruses;Artverviricota;Revtraviricetes;Ortervirates;Caulimoviridae;Badnavirus;Ambrosia_asymptomatic_virus_2_UKM-2007" | 0       | 0     | 0       | 0     | 0       | 0     | 0        | 90    | 0        | 0     | 0       | 0     | 0     |
| 0                                                                                                                      | 0       | 0     | 0       | 0     | 0       | 0     | 0        | 0     | 0        | 0     | 0       | 0     | 0     |
| 0                                                                                                                      | 0       | 0     | 0       | 0     | 0       | 0     | 0        | 0     | 0        | 0     | 0       | 0     | 0     |
| 0                                                                                                                      | 0       | 0     | 0       | 0     | 0       | 0     | 0        | 0     | 0        | 0     | 0       | 0     | 0     |
| 0                                                                                                                      | 0       | 0     | 0       | 0     | 0       | 0     | 0        | 0     | 0        | 0     | 0       | 0     | 0     |
| 0                                                                                                                      | 0       | 0     | 0       | 0     | 0       | 0     | 0        |       |          |       |         |       |       |
| "Viruses;Artverviricota;Revtraviricetes;Ortervirates;Caulimoviridae;Badnavirus;Badnavirus__uc"                         | 0       |       |         |       |         |       |          |       |          |       |         | 0     | 0     |
| 0                                                                                                                      | 0       | 0     | 0       | 0     | 0       | 0     | 0        | 0     | 0        | 0     | 0       | 0     | 0     |
| 0                                                                                                                      | 0       | 0     | 0       | 0     | 0       | 0     | 0        | 0     | 0        | 0     | 0       | 0     | 0     |
| 0                                                                                                                      | 0       | 0     | 0       | 0     | 0       | 0     | 9        | 0     | 0        | 0     | 0       | 0     | 0     |
| 0                                                                                                                      | 0       | 0     | 0       | 0     | 0       | 0     | 0        | 0     | 0        | 0     | 0       | 0     | 0     |
| 0                                                                                                                      | 0       | 0     | 0       | 0     | 0       | 0     | 0        | 0     | 0        | 0     | 0       | 0     | 0     |
| 0                                                                                                                      | 0       | 0     | 0       | 0     |         |       |          |       |          |       |         |       |       |
| "Viruses;Artverviricota;Revtraviricetes;Ortervirates;Caulimoviridae;Badnavirus;Banana_streak_virus"                    |         |       |         |       |         |       |          |       |          |       |         |       | 0     |
| 0                                                                                                                      | 0       | 0     | 0       | 0     | 0       | 0     | 0        | 0     | 0        | 0     | 0       | 0     | 0     |
| 0                                                                                                                      | 0       | 0     | 0       | 0     | 0       | 0     | 0        | 0     | 0        | 0     | 0       | 0     | 0     |
| 0                                                                                                                      | 0       | 0     | 0       | 0     | 0       | 0     | 0        | 1     | 0        | 0     | 0       | 0     | 0     |
| 0                                                                                                                      | 0       | 0     | 0       | 0     | 0       | 0     | 0        | 0     | 0        | 0     | 0       | 0     | 0     |
| 0                                                                                                                      | 0       | 0     | 0       | 0     | 0       | 0     | 0        | 0     | 0        | 0     | 0       | 0     | 0     |
| 0                                                                                                                      | 0       | 0     | 0       | 0     | 0       |       |          |       |          |       |         |       |       |
| "Viruses;Artverviricota;Revtraviricetes;Ortervirates;Caulimoviridae;Badnavirus;Cacao_swollen_shoot_CE_virus"           |         |       |         |       |         |       |          |       |          |       |         |       |       |
| 0                                                                                                                      | 0       | 0     | 0       | 0     | 0       | 0     | 0        | 0     | 0        | 0     | 0       | 0     | 0     |
| 0                                                                                                                      | 0       | 0     | 0       | 0     | 0       | 0     | 0        | 0     | 0        | 0     | 0       | 0     | 0     |
| 0                                                                                                                      | 0       | 0     | 0       | 0     | 0       | 0     | 0        | 0     | 3        | 0     | 0       | 0     | 0     |
| 0                                                                                                                      | 0       | 0     | 0       | 0     | 0       | 0     | 0        | 0     | 0        | 0     | 0       | 0     | 0     |
| 0                                                                                                                      | 0       | 0     | 0       | 0     | 0       | 0     | 0        | 0     | 0        | 0     | 0       | 0     | 0     |
| 0                                                                                                                      | 0       | 0     | 0       | 0     | 0       | 0     |          |       |          |       |         |       |       |
| "Viruses;Artverviricota;Revtraviricetes;Ortervirates;Caulimoviridae;Badnavirus;Grapevine_badna_FI_virus"               |         |       |         |       |         |       |          |       |          |       |         |       |       |
| 0                                                                                                                      | 0       | 0     | 0       | 0     | 0       | 0     | 0        | 0     | 0        | 0     | 0       | 0     | 0     |
| 0                                                                                                                      | 0       | 0     | 0       | 0     | 0</     |       |          |       |          |       |         |       |       |

[illegible]

[illegible]

[illegible]

[illegible]

[illegible]

|                                                                                                                              |   |   |    |     |     |    |    |    |   |   |   |   |
|------------------------------------------------------------------------------------------------------------------------------|---|---|----|-----|-----|----|----|----|---|---|---|---|
| 0                                                                                                                            | 0 | 0 | 0  | 0   | 0   | 0  | 0  | 0  | 0 | 0 | 0 | 0 |
| 0                                                                                                                            | 0 | 0 | 0  | 0   | 0   | 0  |    |    |   |   |   |   |
| "Viruses;Cossaviricota;Quintoviricetes;Piccovirales;Parvoviridae;Parvoviridae__na;Lactuca_sativa_parvo-like_virus"           | 0 | 0 | 0  | 0   | 1   | 0  | 0  | 0  | 0 | 0 | 0 | 0 |
| 0                                                                                                                            | 0 | 0 | 0  | 0   | 0   | 0  | 0  | 0  | 0 | 0 | 0 | 0 |
| 0                                                                                                                            | 0 | 0 | 0  | 0   | 0   | 0  | 0  | 0  | 0 | 0 | 0 | 0 |
| 0                                                                                                                            | 0 | 0 | 1  | 0   | 0   | 0  | 0  | 0  | 0 | 0 | 0 | 0 |
| 0                                                                                                                            | 0 | 0 | 0  | 0   | 0   | 0  | 0  | 0  | 0 | 0 | 0 | 0 |
| 0                                                                                                                            | 0 | 0 | 0  | 0   | 0   | 0  | 0  |    |   |   |   |   |
| "Viruses;Cossaviricota;Quintoviricetes;Piccovirales;Parvoviridae;Parvoviridae__na;Luscinia_sibilans_parvo-like_hybrid_virus" | 0 | 0 | 0  | 1   | 7   | 10 | 0  | 0  | 0 | 0 | 0 | 0 |
| 0                                                                                                                            | 0 | 0 | 0  | 0   | 0   | 0  | 0  | 0  | 0 | 0 | 0 | 0 |
| 0                                                                                                                            | 0 | 0 | 0  | 0   | 0   | 0  | 0  | 0  | 0 | 0 | 0 | 0 |
| 0                                                                                                                            | 0 | 0 | 0  | 0   | 0   | 0  | 0  | 0  | 0 | 3 | 0 | 0 |
| 0                                                                                                                            | 0 | 0 | 0  | 0   | 0   | 0  | 0  | 0  | 0 | 0 | 0 | 0 |
| 0                                                                                                                            | 0 | 0 | 0  | 0   | 0   | 0  | 2  | 0  |   |   |   |   |
| "Viruses;Cossaviricota;Quintoviricetes;Piccovirales;Parvoviridae;Parvoviridae__na;Motacilla_cinerea_parvo-like_hybrid_virus" | 0 | 0 | 0  | 1   | 1   | 0  | 0  | 0  | 0 | 0 | 0 | 0 |
| 0                                                                                                                            | 0 | 0 | 0  | 0   | 0   | 0  | 0  | 0  | 0 | 0 | 0 | 0 |
| 0                                                                                                                            | 0 | 0 | 0  | 0   | 0   | 0  | 0  | 0  | 0 | 0 | 0 | 0 |
| 0                                                                                                                            | 0 | 0 | 0  | 0   | 0   | 0  | 0  | 0  | 0 | 1 | 0 | 0 |
| 0                                                                                                                            | 0 | 0 | 0  | 0   | 0   | 0  | 0  | 0  | 0 | 0 | 0 | 0 |
| 0                                                                                                                            | 0 | 0 | 0  | 0   | 0   | 0  | 0  | 0  |   |   |   |   |
| "Viruses;Cossaviricota;Quintoviricetes;Piccovirales;Parvoviridae;Parvoviridae__na;Otus_scops_parvoviridae_sp."               | 0 | 0 | 0  | 0   | 10  | 0  | 0  | 0  | 0 | 0 | 0 | 0 |
| 0                                                                                                                            | 0 | 0 | 0  | 0   | 0   | 0  | 0  | 0  | 0 | 0 | 0 | 0 |
| 0                                                                                                                            | 0 | 0 | 0  | 0   | 0   | 0  | 0  | 0  | 0 | 0 | 0 | 0 |
| 0                                                                                                                            | 0 | 0 | 0  | 0   | 0   | 0  | 0  | 0  | 0 | 0 | 0 | 0 |
| 0                                                                                                                            | 0 | 0 | 0  | 0   | 0   | 0  | 0  | 0  | 0 | 0 | 0 | 0 |
| 0                                                                                                                            | 0 | 0 | 0  | 0   | 0   | 0  |    |    |   |   |   |   |
| "Viruses;Cossaviricota;Quintoviricetes;Piccovirales;Parvoviridae;Parvoviridae__na;Parvoviridae_sp."                          | 0 | 2 | 14 | 117 | 40  | 0  | 0  | 0  | 0 | 0 | 0 | 0 |
| 0                                                                                                                            | 0 | 1 | 2  | 0   | 0   | 0  | 0  | 1  | 3 | 0 | 0 | 0 |
| 0                                                                                                                            | 0 | 0 | 0  | 0   | 0   | 0  | 2  | 5  | 0 | 0 | 0 | 0 |
| 0                                                                                                                            | 0 | 0 | 0  | 1   | 0   | 0  | 32 | 0  | 0 | 0 | 0 | 1 |
| 73                                                                                                                           | 0 | 0 | 0  | 0   | 0   | 0  | 0  | 0  | 0 | 0 | 0 | 0 |
| 0                                                                                                                            | 0 | 0 | 0  | 3   | 0   |    |    |    |   |   |   |   |
| "Viruses;Cossaviricota;Quintoviricetes;Piccovirales;Parvoviridae;Parvoviridae__na;Parvovirinae_sp."                          | 0 | 0 | 0  | 14  | 7   | 0  | 0  | 0  | 0 | 0 | 0 | 0 |
| 0                                                                                                                            | 0 | 0 | 0  | 0   | 0   | 0  | 0  | 0  | 1 | 0 | 0 | 0 |
| 0                                                                                                                            | 0 | 0 | 0  | 0   | 0   | 0  | 0  | 0  | 0 | 0 | 0 | 0 |
| 0                                                                                                                            | 0 | 0 | 0  | 0   | 0   | 0  | 1  | 0  | 0 | 0 | 0 | 0 |
| 0                                                                                                                            | 0 | 0 | 0  | 0   | 0   | 0  | 0  | 0  | 0 | 0 | 0 | 0 |
| 0                                                                                                                            | 0 | 0 | 0  | 0   | 0   |    |    |    |   |   |   |   |
| "Viruses;Cossaviricota;Quintoviricetes;Piccovirales;Parvoviridae;Parvoviridae__na;Parvovirus_NIH-CQV"                        | 0 | 0 | 2  | 6   | 104 | 53 | 0  | 0  | 0 | 0 | 0 | 0 |
| 0                                                                                                                            | 0 | 0 | 1  | 7   | 0   | 0  | 0  | 0  | 1 | 4 | 0 | 0 |
| 0                                                                                                                            | 0 | 0 | 0  | 0   | 0   | 0  | 0  | 0  | 0 | 0 | 0 | 0 |
| 0                                                                                                                            | 0 | 8 | 0  | 0   | 0   | 0  | 0  | 14 | 0 | 0 | 0 | 0 |

|                                                                                                                                  |   |   |    |     |     |     |    |   |     |    |   |   |
|----------------------------------------------------------------------------------------------------------------------------------|---|---|----|-----|-----|-----|----|---|-----|----|---|---|
|                                                                                                                                  | 0 | 0 | 0  | 0   | 0   | 0   | 0  | 0 | 0   | 0  | 0 | 0 |
|                                                                                                                                  | 0 | 0 | 0  | 0   | 0   | 1   | 0  |   |     |    |   |   |
| "Viruses;Cossaviricota;Quintoviricetes;Piccovirales;Parvoviridae;Parvoviridae__na;Pavo_cristatus_parvo-like_hybrid_virus"        | 0 | 0 | 0  | 0   | 0   | 5   | 0  | 0 | 0   | 0  | 0 | 0 |
|                                                                                                                                  | 0 | 0 | 0  | 0   | 0   | 0   | 0  | 0 | 0   | 0  | 0 | 0 |
|                                                                                                                                  | 0 | 0 | 0  | 0   | 0   | 0   | 0  | 0 | 0   | 0  | 0 | 0 |
|                                                                                                                                  | 0 | 0 | 0  | 0   | 0   | 0   | 0  | 0 | 0   | 0  | 0 | 0 |
|                                                                                                                                  | 0 | 0 | 0  | 0   | 0   | 0   | 0  | 0 | 0   | 0  | 0 | 0 |
|                                                                                                                                  | 0 | 0 | 0  | 0   | 0   | 0   | 0  | 0 | 0   | 0  | 0 | 0 |
|                                                                                                                                  | 0 | 0 | 0  | 0   | 0   | 0   | 0  | 0 |     |    |   |   |
| "Viruses;Cossaviricota;Quintoviricetes;Piccovirales;Parvoviridae;Parvoviridae__na;Phoenicopteridae_parvo-like_hybrid_virus"      | 0 | 0 | 21 | 57  | 180 | 129 | 0  | 0 | 0   | 0  | 0 | 0 |
|                                                                                                                                  | 0 | 0 | 0  | 0   | 4   | 2   | 0  | 0 | 2   | 0  | 3 | 1 |
|                                                                                                                                  | 0 | 0 | 0  | 0   | 0   | 0   | 0  | 0 | 0   | 1  | 0 | 0 |
|                                                                                                                                  | 0 | 0 | 0  | 0   | 6   | 0   | 0  | 0 | 0   | 7  | 0 | 0 |
|                                                                                                                                  | 0 | 2 | 0  | 1   | 0   | 0   | 0  | 0 | 0   | 0  | 0 | 0 |
|                                                                                                                                  | 0 | 0 | 0  | 0   | 0   | 0   | 17 | 0 |     |    |   |   |
| "Viruses;Cossaviricota;Quintoviricetes;Piccovirales;Parvoviridae;Parvoviridae__na;Phoenicopterus_roseus_parvo-like_hybrid_virus" | 0 | 0 | 0  | 3   | 96  | 16  | 0  | 0 | 0   | 0  | 0 | 0 |
|                                                                                                                                  | 0 | 0 | 0  | 0   | 1   | 0   | 0  | 0 | 0   | 0  | 0 | 1 |
|                                                                                                                                  | 0 | 0 | 0  | 0   | 0   | 0   | 0  | 0 | 0   | 0  | 0 | 0 |
|                                                                                                                                  | 0 | 0 | 0  | 0   | 0   | 0   | 0  | 0 | 0   | 11 | 0 | 0 |
|                                                                                                                                  | 0 | 0 | 0  | 0   | 0   | 0   | 0  | 0 | 0   | 0  | 0 | 0 |
|                                                                                                                                  | 0 | 0 | 0  | 0   | 0   | 0   | 0  | 0 |     |    |   |   |
| "Viruses;Cossaviricota;Quintoviricetes;Piccovirales;Parvoviridae;Parvoviridae__na;Phylloscopus_proregulus_parvoviridae_sp."      | 0 | 0 | 0  | 2   | 0   | 0   | 0  | 0 | 0   | 0  | 0 | 0 |
|                                                                                                                                  | 0 | 0 | 0  | 0   | 0   | 0   | 0  | 0 | 0   | 0  | 0 | 0 |
|                                                                                                                                  | 0 | 0 | 0  | 0   | 0   | 0   | 0  | 0 | 0   | 0  | 0 | 0 |
|                                                                                                                                  | 0 | 0 | 0  | 0   | 0   | 0   | 0  | 0 | 0   | 0  | 0 | 0 |
|                                                                                                                                  | 0 | 0 | 0  | 0   | 0   | 0   | 0  | 0 | 0   | 0  | 0 | 0 |
|                                                                                                                                  | 0 | 0 | 0  | 0   | 0   | 0   | 0  | 0 | 0   | 0  | 0 | 0 |
|                                                                                                                                  | 0 | 0 | 0  | 0   | 0   | 0   | 0  |   |     |    |   |   |
| "Viruses;Cossaviricota;Quintoviricetes;Piccovirales;Parvoviridae;Parvoviridae__na;Psittacidae_parvo-like_hybrid_virus"           | 0 | 0 | 1  | 1   | 77  | 4   | 0  | 0 | 0   | 0  | 0 | 0 |
|                                                                                                                                  | 0 | 0 | 0  | 0   | 1   | 0   | 0  | 0 | 0   | 0  | 0 | 2 |
|                                                                                                                                  | 0 | 0 | 0  | 0   | 0   | 0   | 0  | 0 | 0   | 0  | 0 | 0 |
|                                                                                                                                  | 0 | 0 | 0  | 0   | 0   | 0   | 0  | 0 | 0   | 3  | 0 | 0 |
|                                                                                                                                  | 0 | 0 | 0  | 0   | 0   | 0   | 0  | 0 | 0   | 0  | 0 | 0 |
|                                                                                                                                  | 0 | 0 | 0  | 0   | 0   | 0   | 0  | 0 |     |    |   |   |
| "Viruses;Cossaviricota;Quintoviricetes;Piccovirales;Parvoviridae;Parvoviridae__na;Psittacidae_parvoviridae_sp."                  | 0 | 0 | 0  | 3   | 0   | 0   | 0  | 0 | 0   | 0  | 0 | 0 |
|                                                                                                                                  | 0 | 0 | 0  | 0   | 0   | 0   | 0  | 0 | 0   | 0  | 0 | 0 |
|                                                                                                                                  | 0 | 0 | 0  | 0   | 0   | 0   | 0  | 0 | 0   | 0  | 0 | 0 |
|                                                                                                                                  | 0 | 0 | 0  | 0   | 0   | 0   | 0  | 1 | 0   | 0  | 0 | 0 |
|                                                                                                                                  | 0 | 0 | 0  | 0   | 0   | 0   | 0  | 0 | 0   | 0  | 0 | 0 |
|                                                                                                                                  | 0 | 0 | 0  | 0   | 0   | 0   |    |   |     |    |   |   |
| "Viruses;Cossaviricota;Quintoviricetes;Piccovirales;Parvoviridae;Parvoviridae__na;Psittaciform_parvoviridae_sp."                 | 3 | 0 | 38 | 115 | 288 | 538 | 0  | 0 | 0   | 0  | 0 | 0 |
|                                                                                                                                  | 0 | 0 | 0  | 13  | 8   | 0   | 0  | 0 | 0   | 2  | 6 | 0 |
|                                                                                                                                  | 0 | 0 | 0  | 0   | 0   | 0   | 0  | 0 | 3   | 2  | 0 | 0 |
|                                                                                                                                  | 1 | 0 | 22 | 0   | 0   | 3   | 0  | 0 | 141 | 0  | 0 | 0 |



|                                                                                                                                        |   |    |    |     |     |    |   |    |   |   |   |   |   |
|----------------------------------------------------------------------------------------------------------------------------------------|---|----|----|-----|-----|----|---|----|---|---|---|---|---|
|                                                                                                                                        | 3 | 0  | 0  | 0   | 0   | 0  | 0 | 0  | 0 | 0 | 1 | 0 | 0 |
|                                                                                                                                        | 0 | 0  | 0  | 0   | 0   | 21 | 0 |    |   |   |   |   |   |
| "Viruses;Cossaviricota;Quintoviricetes;Piccovirales;Parvoviridae;Parvoviridae__na;Trichosanthes_kirilowii_parvo-like_virus"            | 0 | 0  | 0  | 0   | 2   | 12 | 0 | 0  | 0 | 0 | 0 | 0 | 0 |
|                                                                                                                                        | 0 | 0  | 0  | 0   | 0   | 0  | 0 | 0  | 0 | 0 | 0 | 0 | 0 |
|                                                                                                                                        | 0 | 0  | 0  | 0   | 0   | 0  | 0 | 0  | 0 | 0 | 0 | 0 | 0 |
|                                                                                                                                        | 0 | 0  | 0  | 0   | 0   | 0  | 0 | 0  | 0 | 1 | 0 | 0 | 0 |
|                                                                                                                                        | 0 | 0  | 0  | 0   | 0   | 0  | 0 | 0  | 0 | 0 | 0 | 0 | 0 |
|                                                                                                                                        | 0 | 0  | 0  | 0   | 0   | 0  | 0 |    |   |   |   |   |   |
| "Viruses;Cossaviricota;Quintoviricetes;Piccovirales;Parvoviridae;Parvoviridae__uc;Parvoviridae__uc"                                    | 0 | 25 | 55 | 259 | 271 | 0  | 0 | 0  | 0 | 0 | 0 | 0 | 0 |
|                                                                                                                                        | 0 | 0  | 3  | 0   | 0   | 0  | 0 | 0  | 1 | 1 | 0 | 0 | 0 |
|                                                                                                                                        | 0 | 0  | 0  | 0   | 0   | 0  | 0 | 2  | 0 | 0 | 0 | 0 | 0 |
|                                                                                                                                        | 0 | 19 | 0  | 0   | 0   | 0  | 0 | 24 | 0 | 0 | 0 | 0 | 1 |
|                                                                                                                                        | 1 | 0  | 0  | 0   | 0   | 0  | 0 | 0  | 0 | 0 | 0 | 0 | 0 |
|                                                                                                                                        | 0 | 0  | 0  | 0   | 1   | 0  |   |    |   |   |   |   |   |
| "Viruses;Cossaviricota;Quintoviricetes;Piccovirales;Parvoviridae;Protoambidensovirus;Dipteran_protoambidensovirus_1"                   | 0 | 0  | 4  | 0   | 0   | 0  | 0 | 0  | 0 | 0 | 0 | 0 | 0 |
|                                                                                                                                        | 0 | 0  | 0  | 0   | 0   | 0  | 0 | 0  | 0 | 0 | 0 | 0 | 0 |
|                                                                                                                                        | 0 | 0  | 0  | 0   | 0   | 0  | 0 | 0  | 0 | 0 | 0 | 0 | 0 |
|                                                                                                                                        | 0 | 0  | 0  | 0   | 0   | 0  | 0 | 0  | 0 | 4 | 0 | 0 | 0 |
|                                                                                                                                        | 0 | 0  | 0  | 0   | 0   | 0  | 0 | 0  | 0 | 0 | 0 | 0 | 0 |
|                                                                                                                                        | 0 | 0  | 0  | 0   | 0   | 0  | 0 |    |   |   |   |   |   |
| "Viruses;Cossaviricota;Quintoviricetes;Piccovirales;Parvoviridae;Protoparvovirus;Carnivore_protoparvovirus_1"                          | 0 | 0  | 0  | 1   | 7   | 3  | 0 | 0  | 0 | 0 | 0 | 0 | 0 |
|                                                                                                                                        | 0 | 0  | 0  | 0   | 0   | 0  | 0 | 0  | 0 | 0 | 0 | 0 | 0 |
|                                                                                                                                        | 0 | 0  | 0  | 0   | 0   | 0  | 0 | 0  | 0 | 0 | 0 | 0 | 0 |
|                                                                                                                                        | 0 | 0  | 0  | 0   | 0   | 0  | 0 | 0  | 0 | 0 | 0 | 0 | 0 |
|                                                                                                                                        | 0 | 0  | 0  | 0   | 0   | 0  | 0 | 0  | 0 | 0 | 0 | 0 | 0 |
|                                                                                                                                        | 0 | 0  | 0  | 0   | 0   | 0  | 0 |    |   |   |   |   |   |
| "Viruses;Cressdnaviricota;Arfiviricetes;Cirlivirales;Circoviridae;Circoviridae__na;Avon-Heathcote_Estuary_associated_circular_virus_3" | 0 | 0  | 0  | 0   | 0   | 0  | 0 | 0  | 0 | 2 | 0 | 0 | 0 |
|                                                                                                                                        | 0 | 0  | 0  | 0   | 0   | 0  | 0 | 0  | 0 | 0 | 0 | 0 | 0 |
|                                                                                                                                        | 0 | 0  | 0  | 0   | 0   | 0  | 0 | 0  | 0 | 0 | 0 | 0 | 0 |
|                                                                                                                                        | 0 | 0  | 0  | 0   | 0   | 0  | 0 | 0  | 0 | 0 | 0 | 0 | 0 |
|                                                                                                                                        | 0 | 0  | 0  | 0   | 0   | 0  | 0 | 0  | 0 | 0 | 0 | 0 | 0 |
|                                                                                                                                        | 0 | 0  | 0  | 0   | 0   | 0  | 0 | 0  | 0 | 0 | 0 | 0 | 0 |
| "Viruses;Cressdnaviricota;Arfiviricetes;Cirlivirales;Circoviridae;Circoviridae__na;Circoviridae_LDMD-2013b"                            | 0 | 0  | 0  | 0   | 2   | 2  | 0 | 0  | 0 | 0 | 0 | 0 | 0 |
|                                                                                                                                        | 0 | 0  | 0  | 0   | 0   | 0  | 0 | 0  | 0 | 0 | 0 | 0 | 0 |
|                                                                                                                                        | 0 | 0  | 0  | 0   | 0   | 0  | 0 | 0  | 0 | 0 | 0 | 0 | 0 |
|                                                                                                                                        | 0 | 0  | 0  | 0   | 0   | 0  | 0 | 0  | 0 | 0 | 0 | 0 | 0 |
|                                                                                                                                        | 0 | 0  | 0  | 0   | 0   | 0  | 0 | 0  | 0 | 0 | 0 | 0 | 0 |
|                                                                                                                                        | 0 | 0  | 0  | 0   | 0   | 0  |   |    |   |   |   |   |   |
| "Viruses;Cressdnaviricota;Arfiviricetes;Cirlivirales;Circoviridae;Circoviridae__na;Circoviridae_sp."                                   | 0 | 1  | 3  | 2   | 28  | 0  | 0 | 0  | 0 | 0 | 0 | 0 | 0 |
|                                                                                                                                        | 0 | 1  | 0  | 3   | 0   | 0  | 0 | 0  | 0 | 0 | 0 | 0 | 0 |
|                                                                                                                                        | 0 | 0  | 0  | 0   | 0   | 0  | 0 | 0  | 0 | 0 | 0 | 0 | 0 |
|                                                                                                                                        | 0 | 0  | 0  | 0   | 0   | 0  | 0 | 1  | 0 | 0 | 0 | 0 | 0 |

|                                                                                                                      |   |    |     |     |   |    |    |   |   |    |   |   |
|----------------------------------------------------------------------------------------------------------------------|---|----|-----|-----|---|----|----|---|---|----|---|---|
| 0                                                                                                                    | 0 | 0  | 0   | 0   | 0 | 0  | 0  | 0 | 0 | 0  | 0 | 0 |
| 0                                                                                                                    | 0 | 0  | 0   | 0   | 0 |    |    |   |   |    |   |   |
| "Viruses;Cressdnaviricota;Arfiviricetes;Cirlivirales;Circoviridae;Circoviridae__na;Circovirus-like_genome_DCCV-13"   |   |    |     |     |   |    |    |   |   |    |   |   |
| 0                                                                                                                    | 0 | 0  | 0   | 0   | 0 | 0  | 0  | 0 | 0 | 0  | 0 | 0 |
| 0                                                                                                                    | 0 | 0  | 0   | 0   | 0 | 0  | 0  | 0 | 0 | 0  | 1 | 1 |
| 0                                                                                                                    | 0 | 0  | 0   | 0   | 1 | 0  | 0  | 0 | 0 | 0  | 0 | 0 |
| 0                                                                                                                    | 0 | 0  | 0   | 0   | 0 | 0  | 0  | 0 | 0 | 16 | 0 | 0 |
| 0                                                                                                                    | 0 | 0  | 0   | 0   | 0 | 0  | 0  | 0 | 0 | 0  | 0 | 0 |
| 0                                                                                                                    | 0 | 0  | 0   | 0   | 0 | 0  | 0  | 0 |   |    |   |   |
| "Viruses;Cressdnaviricota;Arfiviricetes;Cirlivirales;Circoviridae;Circoviridae__na;Circovirus-like_genome_DCCV-4"    |   |    |     |     |   |    |    |   |   |    |   |   |
| 0                                                                                                                    | 0 | 0  | 0   | 0   | 7 | 1  | 0  | 0 | 0 | 0  | 0 | 0 |
| 0                                                                                                                    | 0 | 0  | 0   | 0   | 0 | 0  | 0  | 0 | 0 | 0  | 0 | 0 |
| 0                                                                                                                    | 0 | 0  | 0   | 0   | 0 | 0  | 0  | 0 | 0 | 0  | 0 | 0 |
| 0                                                                                                                    | 0 | 0  | 0   | 0   | 0 | 0  | 0  | 0 | 0 | 3  | 0 | 0 |
| 0                                                                                                                    | 0 | 0  | 0   | 0   | 0 | 0  | 0  | 0 | 0 | 0  | 0 | 0 |
| 0                                                                                                                    | 0 | 0  | 0   | 0   | 0 | 0  | 0  | 0 |   |    |   |   |
| "Viruses;Cressdnaviricota;Arfiviricetes;Cirlivirales;Circoviridae;Circoviridae__na;Circovirus-like_genome_DCCV-7"    |   |    |     |     |   |    |    |   |   |    |   |   |
| 0                                                                                                                    | 0 | 0  | 0   | 0   | 0 | 11 | 0  | 0 | 0 | 0  | 0 | 0 |
| 0                                                                                                                    | 0 | 0  | 0   | 0   | 0 | 0  | 0  | 0 | 0 | 0  | 0 | 0 |
| 0                                                                                                                    | 0 | 0  | 0   | 0   | 0 | 0  | 0  | 0 | 0 | 0  | 0 | 0 |
| 0                                                                                                                    | 0 | 0  | 0   | 0   | 0 | 0  | 0  | 0 | 0 | 0  | 0 | 0 |
| 0                                                                                                                    | 0 | 0  | 0   | 0   | 0 | 0  | 0  | 0 | 0 | 0  | 0 | 0 |
| 0                                                                                                                    | 0 | 0  | 0   | 0   | 0 | 0  | 0  | 0 |   |    |   |   |
| "Viruses;Cressdnaviricota;Arfiviricetes;Cirlivirales;Circoviridae;Circoviridae__na;Circovirus-like_genome_DHCV-2"    |   |    |     |     |   |    |    |   |   |    |   |   |
| 0                                                                                                                    | 0 | 0  | 0   | 0   | 0 | 0  | 0  | 0 | 0 | 0  | 0 | 0 |
| 0                                                                                                                    | 0 | 0  | 0   | 0   | 0 | 0  | 0  | 0 | 0 | 0  | 0 | 0 |
| 0                                                                                                                    | 0 | 0  | 0   | 0   | 0 | 0  | 0  | 0 | 0 | 0  | 0 | 0 |
| 0                                                                                                                    | 0 | 0  | 0   | 0   | 0 | 0  | 0  | 0 | 0 | 1  | 0 | 0 |
| 0                                                                                                                    | 0 | 0  | 0   | 0   | 0 | 0  | 0  | 0 | 0 | 0  | 0 | 0 |
| 0                                                                                                                    | 0 | 0  | 0   | 0   | 0 | 0  | 0  | 0 |   |    |   |   |
| "Viruses;Cressdnaviricota;Arfiviricetes;Cirlivirales;Circoviridae;Circoviridae__na;Tick-associated_circular_virus-2" |   |    |     |     |   |    |    |   |   |    |   |   |
| 0                                                                                                                    | 0 | 0  | 0   | 0   | 0 | 3  | 0  | 1 | 0 | 0  | 0 | 0 |
| 0                                                                                                                    | 0 | 0  | 0   | 0   | 0 | 0  | 0  | 0 | 0 | 0  | 0 | 0 |
| 0                                                                                                                    | 0 | 0  | 0   | 0   | 0 | 0  | 0  | 0 | 0 | 0  | 0 | 0 |
| 0                                                                                                                    | 0 | 0  | 0   | 0   | 0 | 0  | 0  | 0 | 0 | 0  | 0 | 0 |
| 0                                                                                                                    | 0 | 0  | 0   | 0   | 0 | 0  | 0  | 0 | 0 | 0  | 0 | 0 |
| 0                                                                                                                    | 0 | 0  | 0   | 0   | 0 | 0  | 0  | 0 | 0 |    |   |   |
| "Viruses;Cressdnaviricota;Arfiviricetes;Cirlivirales;Circoviridae;Circoviridae__na;Wastewater_CRESS_DNA_virus_3"     |   |    |     |     |   |    |    |   |   |    |   |   |
| 0                                                                                                                    | 0 | 0  | 0   | 0   | 8 | 0  | 0  | 0 | 0 | 0  | 0 | 0 |
| 0                                                                                                                    | 0 | 0  | 0   | 0   | 0 | 0  | 0  | 0 | 0 | 0  | 0 | 0 |
| 0                                                                                                                    | 0 | 0  | 0   | 0   | 0 | 0  | 0  | 0 | 2 | 0  | 0 | 0 |
| 0                                                                                                                    | 0 | 0  | 0   | 0   | 0 | 0  | 0  | 2 | 0 | 0  | 0 | 0 |
| 0                                                                                                                    | 0 | 0  | 0   | 0   | 0 | 0  | 0  | 0 | 0 | 0  | 0 | 0 |
| 0                                                                                                                    | 0 | 0  | 0   | 0   | 4 | 0  |    |   |   |    |   |   |
| "Viruses;Cressdnaviricota;Arfiviricetes;Cirlivirales;Circoviridae;Circoviridae__uc;Circoviridae__uc"                 |   |    |     |     |   |    |    |   |   |    |   |   |
| 0                                                                                                                    | 4 | 17 | 155 | 102 | 0 | 0  | 0  | 0 | 0 | 0  | 0 | 0 |
| 0                                                                                                                    | 0 | 1  | 0   | 0   | 0 | 0  | 0  | 3 | 2 | 0  | 0 | 0 |
| 0                                                                                                                    | 0 | 0  | 0   | 0   | 0 | 0  | 0  | 0 | 0 | 0  | 0 | 0 |
| 0                                                                                                                    | 8 | 0  | 0   | 0   | 1 | 0  | 51 | 0 | 0 | 0  | 1 | 0 |

|                                                                                                                                 |     |      |      |   |   |     |    |    |   |   |   |   |   |
|---------------------------------------------------------------------------------------------------------------------------------|-----|------|------|---|---|-----|----|----|---|---|---|---|---|
| 0                                                                                                                               | 0   | 0    | 0    | 0 | 0 | 21  | 0  | 0  | 0 | 0 | 0 | 0 |   |
| 0                                                                                                                               | 0   | 0    | 0    | 5 | 0 |     |    |    |   |   |   |   |   |
| "Viruses;Cressdnaviricota;Arfiviricetes;Cirlivirales;Circoviridae;Circovirus;Bat_circovirus"                                    |     |      |      |   |   |     |    |    |   |   |   | 0 | 0 |
| 0                                                                                                                               | 0   | 5    | 0    | 0 | 0 | 0   | 0  | 0  | 0 | 0 | 0 | 0 |   |
| 0                                                                                                                               | 0   | 0    | 0    | 0 | 0 | 0   | 0  | 0  | 0 | 0 | 0 | 0 |   |
| 0                                                                                                                               | 0   | 0    | 0    | 0 | 0 | 0   | 0  | 0  | 0 | 0 | 0 | 0 |   |
| 0                                                                                                                               | 0   | 0    | 0    | 0 | 0 | 0   | 0  | 0  | 0 | 0 | 0 | 0 |   |
| 0                                                                                                                               | 0   | 0    | 0    | 0 | 0 | 0   | 0  | 0  | 0 | 0 | 0 | 0 |   |
| 0                                                                                                                               | 0   | 0    | 0    | 0 | 0 | 0   | 0  | 0  | 0 | 0 | 0 | 0 |   |
| "Viruses;Cressdnaviricota;Arfiviricetes;Cirlivirales;Circoviridae;Circovirus;Beak_and_feather_disease_virus"                    |     |      |      |   |   |     |    |    |   |   |   |   |   |
| 0                                                                                                                               | 0   | 0    | 4    | 0 | 5 | 0   | 0  | 0  | 0 | 0 | 0 | 0 |   |
| 0                                                                                                                               | 0   | 0    | 0    | 0 | 0 | 0   | 0  | 0  | 0 | 0 | 0 | 0 |   |
| 0                                                                                                                               | 0   | 0    | 0    | 0 | 0 | 0   | 0  | 0  | 0 | 0 | 0 | 0 |   |
| 0                                                                                                                               | 0   | 0    | 0    | 0 | 0 | 0   | 0  | 0  | 0 | 0 | 0 | 0 |   |
| 0                                                                                                                               | 0   | 0    | 0    | 0 | 0 | 0   | 0  | 0  | 0 | 0 | 0 | 0 |   |
| 0                                                                                                                               | 0   | 0    | 0    | 0 | 0 | 0   |    |    |   |   |   |   |   |
| "Viruses;Cressdnaviricota;Arfiviricetes;Cirlivirales;Circoviridae;Circovirus;Circovirus_sp."                                    |     |      |      |   |   |     |    |    |   |   |   | 0 | 0 |
| 234                                                                                                                             | 844 | 2030 | 1486 | 0 | 0 | 0   | 0  | 0  | 0 | 0 | 0 | 1 |   |
| 2                                                                                                                               | 33  | 10   | 0    | 0 | 5 | 0   | 19 | 40 | 0 | 0 | 5 | 0 |   |
| 0                                                                                                                               | 3   | 0    | 0    | 0 | 0 | 44  | 10 | 0  | 0 | 3 | 0 | 2 |   |
| 888                                                                                                                             | 0   | 0    | 19   | 5 | 0 | 301 | 0  | 0  | 1 | 9 | 8 | 1 |   |
| 0                                                                                                                               | 0   | 0    | 0    | 0 | 0 | 0   | 0  | 0  | 0 | 0 | 3 | 0 |   |
| 0                                                                                                                               | 0   | 0    | 38   | 0 |   |     |    |    |   |   |   |   |   |
| "Viruses;Cressdnaviricota;Arfiviricetes;Cirlivirales;Circoviridae;Circovirus;Giant_panda_circovirus_1"                          |     |      |      |   |   |     |    |    |   |   |   | 0 |   |
| 0                                                                                                                               | 0   | 1    | 6    | 6 | 0 | 0   | 0  | 0  | 0 | 0 | 0 | 0 |   |
| 0                                                                                                                               | 0   | 1    | 0    | 0 | 0 | 0   | 0  | 0  | 0 | 0 | 0 | 0 |   |
| 0                                                                                                                               | 0   | 0    | 0    | 0 | 0 | 0   | 0  | 0  | 0 | 0 | 0 | 0 |   |
| 0                                                                                                                               | 0   | 0    | 0    | 0 | 0 | 0   | 0  | 0  | 0 | 0 | 0 | 0 |   |
| 0                                                                                                                               | 0   | 0    | 0    | 0 | 0 | 0   | 0  | 0  | 0 | 0 | 0 | 0 |   |
| 0                                                                                                                               | 0   | 0    | 0    | 0 | 0 |     |    |    |   |   |   |   |   |
| "Viruses;Cressdnaviricota;Arfiviricetes;Cirlivirales;Circoviridae;Circovirus;Sichuan_tick-associated_circovirus_4"              |     |      |      |   |   |     |    |    |   |   |   | 0 | 0 |
| 0                                                                                                                               | 0   | 0    | 0    | 0 | 0 | 0   | 0  | 0  | 0 | 0 | 0 | 0 |   |
| 0                                                                                                                               | 0   | 0    | 0    | 0 | 0 | 0   | 0  | 0  | 0 | 0 | 0 | 0 |   |
| 0                                                                                                                               | 0   | 0    | 0    | 0 | 0 | 0   | 0  | 0  | 0 | 0 | 0 | 0 |   |
| 0                                                                                                                               | 0   | 0    | 0    | 0 | 0 | 0   | 0  | 0  | 0 | 0 | 0 | 0 |   |
| 0                                                                                                                               | 0   | 0    | 0    | 0 | 0 | 0   | 0  | 0  | 0 |   |   |   |   |
| "Viruses;Cressdnaviricota;Arfiviricetes;Cirlivirales;Circoviridae;Circovirus;Sichuan_tick-associated_circovirus_5"              |     |      |      |   |   |     |    |    |   |   |   |   |   |
| 0                                                                                                                               | 0   | 0    | 0    | 0 | 0 | 0   | 0  | 0  | 0 | 0 | 0 | 0 |   |
| 0                                                                                                                               | 0   | 0    | 0    | 0 | 0 | 0   | 0  | 0  | 0 | 0 | 0 | 0 |   |
| 0                                                                                                                               | 0   | 0    | 0    | 0 | 0 | 0   | 0  | 0  | 0 | 0 | 0 | 0 |   |
| 0                                                                                                                               | 0   | 0    | 0    | 0 | 0 | 0   | 0  | 0  | 0 | 0 | 0 | 0 |   |
| 0                                                                                                                               | 0   | 0    | 0    | 0 | 0 | 0   | 0  | 0  | 0 |   |   |   |   |
| "Viruses;Cressdnaviricota;Arfiviricetes;Cirlivirales;Vilyaviridae;Glamdringvirus;Rodent_stool-associated_circular_genome_virus" |     |      |      |   |   |     |    |    |   |   |   | 0 | 0 |
| 0                                                                                                                               | 0   | 0    | 0    | 0 | 0 | 0   | 0  | 0  | 0 | 0 | 0 | 0 |   |
| 0                                                                                                                               | 0   | 0    | 0    | 0 | 0 | 0   | 0  | 0  | 0 | 0 | 0 | 0 |   |
| 0                                                                                                                               | 0   | 0    | 0    | 0 | 0 | 0   | 0  | 0  | 0 | 0 | 0 | 1 |   |

[illegible]

[illegible]

[illegible]

[illegible]

|                                                                                                                        |     |     |     |     |    |     |     |     |     |    |     |     |
|------------------------------------------------------------------------------------------------------------------------|-----|-----|-----|-----|----|-----|-----|-----|-----|----|-----|-----|
| 0                                                                                                                      | 0   | 0   | 0   | 0   | 0  | 0   | 0   | 0   | 0   | 0  | 0   | 0   |
| 0                                                                                                                      | 0   | 0   | 0   | 0   |    |     |     |     |     |    |     |     |
| "Viruses;Hofneiviricota;Faserviricetes;Tubulavirales;Inoviridae;Inoviridae__na;Inoviridae_sp."                         |     |     |     |     |    |     |     |     |     |    | 0   | 4   |
| 1                                                                                                                      | 1   | 82  | 0   | 0   | 0  | 1   | 2   | 0   | 0   | 69 | 102 | 6   |
| 4                                                                                                                      | 7   | 19  | 73  | 153 | 5  | 2   | 8   | 0   | 24  | 45 | 5   | 0   |
| 2                                                                                                                      | 0   | 147 | 168 | 2   | 3  | 17  | 7   | 262 | 239 | 13 | 10  | 3   |
| 65                                                                                                                     | 33  | 36  | 6   | 0   | 11 | 0   | 108 | 110 | 3   | 1  | 14  | 9   |
| 248                                                                                                                    | 307 | 4   | 1   | 0   | 0  | 115 | 136 | 14  | 33  | 3  | 3   | 102 |
| 252                                                                                                                    | 1   | 12  | 7   | 0   |    |     |     |     |     |    |     |     |
| "Viruses;Hofneiviricota;Faserviricetes;Tubulavirales;Inoviridae;Inoviridae__na;Inoviridae_sp._ct1ro12"                 |     |     |     |     |    |     |     |     |     |    | 0   |     |
| 0                                                                                                                      | 0   | 0   | 0   | 0   | 0  | 0   | 0   | 0   | 0   | 0  | 0   | 2   |
| 0                                                                                                                      | 0   | 0   | 0   | 0   | 0  | 0   | 0   | 0   | 0   | 1  | 1   | 0   |
| 0                                                                                                                      | 0   | 0   | 1   | 0   | 0  | 0   | 0   | 0   | 0   | 0  | 0   | 0   |
| 0                                                                                                                      | 0   | 0   | 0   | 0   | 0  | 0   | 0   | 0   | 0   | 0  | 0   | 0   |
| 0                                                                                                                      | 0   | 0   | 0   | 0   | 0  | 0   | 0   | 1   | 0   | 0  | 0   | 0   |
| 0                                                                                                                      | 0   | 0   | 0   | 0   | 0  |     |     |     |     |    |     |     |
| "Viruses;Hofneiviricota;Faserviricetes;Tubulavirales;Inoviridae;Inoviridae__na;Inoviridae_sp._ctaKY11"                 |     |     |     |     |    |     |     |     |     |    | 0   |     |
| 0                                                                                                                      | 0   | 0   | 0   | 0   | 0  | 0   | 0   | 0   | 0   | 0  | 0   | 0   |
| 0                                                                                                                      | 0   | 0   | 0   | 0   | 0  | 0   | 0   | 0   | 0   | 0  | 0   | 0   |
| 0                                                                                                                      | 0   | 0   | 4   | 2   | 0  | 0   | 0   | 0   | 0   | 0  | 0   | 0   |
| 0                                                                                                                      | 0   | 0   | 0   | 0   | 0  | 0   | 0   | 0   | 0   | 0  | 0   | 0   |
| 0                                                                                                                      | 0   | 0   | 0   | 0   | 0  | 0   | 0   | 0   | 0   | 0  | 0   | 0   |
| 0                                                                                                                      | 0   | 0   | 0   | 0   | 0  |     |     |     |     |    |     |     |
| "Viruses;Hofneiviricota;Faserviricetes;Tubulavirales;Inoviridae;Inoviridae__na;Inoviridae_sp._ctDEu7"                  |     |     |     |     |    |     |     |     |     |    | 0   |     |
| 0                                                                                                                      | 0   | 0   | 0   | 0   | 0  | 0   | 0   | 0   | 0   | 0  | 0   | 0   |
| 0                                                                                                                      | 0   | 0   | 0   | 0   | 0  | 0   | 0   | 0   | 0   | 0  | 0   | 0   |
| 0                                                                                                                      | 0   | 0   | 0   | 2   | 0  | 0   | 0   | 0   | 0   | 0  | 0   | 0   |
| 0                                                                                                                      | 0   | 0   | 0   | 0   | 0  | 0   | 0   | 0   | 0   | 0  | 0   | 0   |
| 0                                                                                                                      | 0   | 0   | 0   | 0   | 0  | 0   | 0   | 0   | 0   | 0  | 0   | 0   |
| 0                                                                                                                      | 10  | 0   | 0   | 0   | 0  |     |     |     |     |    |     |     |
| "Viruses;Hofneiviricota;Faserviricetes;Tubulavirales;Inoviridae;Inoviridae__uc;Inoviridae__uc"                         |     |     |     |     |    |     |     |     |     |    | 0   | 0   |
| 0                                                                                                                      | 0   | 0   | 0   | 0   | 0  | 0   | 0   | 0   | 0   | 1  | 3   | 0   |
| 0                                                                                                                      | 0   | 0   | 0   | 0   | 0  | 0   | 0   | 0   | 0   | 0  | 0   | 0   |
| 0                                                                                                                      | 0   | 10  | 16  | 0   | 0  | 1   | 0   | 0   | 2   | 0  | 0   | 0   |
| 0                                                                                                                      | 0   | 0   | 0   | 0   | 0  | 0   | 0   | 0   | 0   | 0  | 0   | 0   |
| 0                                                                                                                      | 1   | 0   | 0   | 0   | 0  | 2   | 1   | 2   | 4   | 0  | 1   | 0   |
| 0                                                                                                                      | 0   | 0   | 0   | 0   |    |     |     |     |     |    |     |     |
| "Viruses;Hofneiviricota;Faserviricetes;Tubulavirales;Inoviridae;Inovirus;Inovirus_sp."                                 |     |     |     |     |    |     |     |     |     |    | 0   | 0   |
| 0                                                                                                                      | 0   | 0   | 0   | 0   | 0  | 0   | 0   | 0   | 0   | 0  | 0   | 0   |
| 0                                                                                                                      | 0   | 0   | 0   | 0   | 0  | 0   | 0   | 0   | 0   | 0  | 0   | 0   |
| 0                                                                                                                      | 0   | 0   | 0   | 0   | 0  | 0   | 0   | 0   | 0   | 0  | 0   | 0   |
| 0                                                                                                                      | 0   | 0   | 0   | 0   | 0  | 0   | 0   | 0   | 0   | 0  | 0   | 0   |
| 0                                                                                                                      | 0   | 0   | 0   | 0   | 2  | 3   | 1   | 1   | 0   | 0  | 0   | 0   |
| 0                                                                                                                      | 0   | 0   | 0   |     |    |     |     |     |     |    |     |     |
| "Viruses;Kitrinoviricota;Alsuviricetes;Martellivirales;Endornaviridae;Alphaendornavirus;Bell_pepper_alphaendornavirus" |     |     |     |     |    |     |     |     |     |    |     |     |
| 0                                                                                                                      | 0   | 0   | 0   | 1   | 0  | 0   | 0   | 0   | 0   | 0  | 0   | 0   |
| 0                                                                                                                      | 0   | 0   | 0   | 0   | 0  | 0   | 0   | 0   | 0   | 0  | 0   | 0   |
| 0                                                                                                                      | 0   | 0   | 0   | 0   | 0  | 0   | 0   | 0   | 0   | 0  | 0   | 0   |
| 0                                                                                                                      | 0   | 0   | 0   | 0   | 0  | 0   | 0   | 0   | 0   | 0  | 0   | 0   |



[illegible]

[illegible]

|                                                                                                                            |    |    |    |   |    |   |   |   |   |    |    |      |
|----------------------------------------------------------------------------------------------------------------------------|----|----|----|---|----|---|---|---|---|----|----|------|
| 0                                                                                                                          | 0  | 0  | 0  | 0 | 0  | 0 | 0 | 0 | 0 | 0  | 1  | 0    |
| 0                                                                                                                          | 0  | 0  | 0  | 0 | 0  | 0 |   |   |   |    |    |      |
| "Viruses;Kitrinoviricota;Alsuviricetes;Tymovirales;Betaflexiviridae;Carlavirus;Carlavirus_uc"                              |    |    |    |   |    |   |   |   |   |    | 0  | 0    |
| 0                                                                                                                          | 0  | 0  | 0  | 0 | 0  | 0 | 0 | 0 | 0 | 0  | 0  | 0    |
| 0                                                                                                                          | 0  | 0  | 0  | 0 | 0  | 0 | 0 | 0 | 0 | 0  | 0  | 0    |
| 0                                                                                                                          | 0  | 0  | 0  | 0 | 0  | 0 | 0 | 0 | 0 | 0  | 0  | 0    |
| 0                                                                                                                          | 0  | 0  | 0  | 0 | 0  | 0 | 0 | 0 | 0 | 0  | 0  | 0    |
| 0                                                                                                                          | 0  | 0  | 0  | 0 | 0  | 0 | 0 | 0 | 0 | 0  | 0  | 0    |
| 0                                                                                                                          | 0  | 0  | 0  | 0 | 0  | 0 | 0 | 2 | 0 | 0  | 0  | 0    |
| 0                                                                                                                          | 0  | 0  | 0  | 0 |    |   |   |   |   |    |    |      |
| "Viruses;Kitrinoviricota;Alsuviricetes;Tymovirales;Tymovirales_na;Tymovirales_na;Erysiphe_necator_associated_flexivirus_3" |    |    |    |   |    |   |   |   |   |    | 0  | 186  |
| 0                                                                                                                          | 0  | 0  | 0  | 0 | 0  | 0 | 0 | 0 | 0 | 0  | 0  | 0    |
| 0                                                                                                                          | 0  | 0  | 0  | 0 | 0  | 0 | 0 | 0 | 0 | 0  | 0  | 0    |
| 0                                                                                                                          | 0  | 0  | 0  | 0 | 0  | 0 | 0 | 0 | 0 | 0  | 0  | 0    |
| 0                                                                                                                          | 0  | 0  | 0  | 0 | 0  | 0 | 0 | 0 | 0 | 0  | 0  | 0    |
| 0                                                                                                                          | 0  | 0  | 0  | 0 | 0  | 0 | 0 | 0 |   | 0  | 0  | 0    |
| 0                                                                                                                          | 0  | 0  | 0  | 0 | 0  | 0 | 0 | 0 |   |    |    |      |
| "Viruses;Kitrinoviricota;Alsuviricetes;Tymovirales;Tymovirales_na;Tymovirales_na;Tymovirales_sp."                          |    |    |    |   |    |   |   |   |   |    | 0  |      |
| 0                                                                                                                          | 0  | 0  | 0  | 0 | 0  | 0 | 0 | 0 | 0 | 0  | 0  | 0    |
| 0                                                                                                                          | 0  | 0  | 0  | 0 | 0  | 0 | 0 | 0 | 0 | 0  | 0  | 2    |
| 0                                                                                                                          | 0  | 0  | 0  | 0 | 0  | 0 | 0 | 0 | 0 | 0  | 0  | 0    |
| 0                                                                                                                          | 0  | 0  | 0  | 0 | 0  | 0 | 0 | 0 | 0 | 0  | 0  | 0    |
| 0                                                                                                                          | 0  | 0  | 0  | 0 | 0  | 0 | 0 | 0 | 0 | 0  | 0  | 0    |
| 0                                                                                                                          | 0  | 0  | 0  | 0 | 0  |   |   |   |   |    |    |      |
| "Viruses;Kitrinoviricota;Alsuviricetes;Tymovirales;Tymovirales_uc;Tymovirales_uc;Tymovirales_uc"                           |    |    |    |   |    |   |   |   |   |    | 0  |      |
| 0                                                                                                                          | 2  | 0  | 0  | 0 | 0  | 0 | 3 | 0 | 0 | 0  | 0  | 0    |
| 3                                                                                                                          | 0  | 0  | 0  | 0 | 0  | 6 | 6 | 0 | 1 | 0  | 0  | 2447 |
| 78                                                                                                                         | 58 | 31 | 0  | 0 | 0  | 0 | 0 | 0 | 0 | 0  | 53 | 52   |
| 0                                                                                                                          | 9  | 0  | 0  | 1 | 2  | 0 | 0 | 0 | 0 | 11 | 1  | 33   |
| 0                                                                                                                          | 0  | 0  | 0  | 0 | 1  | 0 | 0 | 0 | 2 | 0  | 0  | 0    |
| 0                                                                                                                          | 0  | 0  | 14 | 3 | 0  |   |   |   |   |    |    |      |
| "Viruses;Kitrinoviricota;Flasuviricetes;Amarillovirales;Flaviviridae;Hepacivirus;Hepacivirus_C"                            |    |    |    |   |    |   |   |   |   |    | 0  | 0    |
| 0                                                                                                                          | 0  | 0  | 0  | 0 | 0  | 0 | 0 | 0 | 0 | 0  | 0  | 0    |
| 0                                                                                                                          | 0  | 0  | 0  | 0 | 0  | 0 | 0 | 0 | 0 | 0  | 0  | 0    |
| 0                                                                                                                          | 0  | 0  | 0  | 0 | 0  | 0 | 1 | 0 | 0 | 0  | 0  | 0    |
| 0                                                                                                                          | 0  | 0  | 0  | 0 | 0  | 0 | 0 | 0 | 0 | 0  | 0  | 0    |
| 0                                                                                                                          | 0  | 0  | 0  | 0 | 0  | 0 | 0 | 0 | 0 | 0  | 0  | 0    |
| 0                                                                                                                          | 0  | 0  | 0  | 0 |    |   |   |   |   |    |    |      |
| "Viruses;Kitrinoviricota;Flasuviricetes;Amarillovirales;Flaviviridae;Pegivirus;Pegivirus_uc"                               |    |    |    |   |    |   |   |   |   |    | 0  | 0    |
| 0                                                                                                                          | 0  | 0  | 0  | 0 | 0  | 0 | 0 | 0 | 0 | 0  | 0  | 0    |
| 0                                                                                                                          | 0  | 0  | 0  | 0 | 0  | 0 | 0 | 0 | 0 | 0  | 0  | 0    |
| 0                                                                                                                          | 0  | 0  | 0  | 0 | 0  | 0 | 0 | 0 | 0 | 0  | 0  | 0    |
| 0                                                                                                                          | 0  | 0  | 0  | 0 | 14 | 0 | 0 | 0 | 0 | 0  | 0  | 0    |
| 0                                                                                                                          | 0  | 0  | 0  | 0 | 0  | 0 | 0 | 0 | 0 | 0  | 0  | 0    |
| 0                                                                                                                          | 0  | 0  | 0  | 0 |    |   |   |   |   |    |    |      |
| "Viruses;Lenarviricota;Amabiliviricetes;Wolframvirales;Narnaviridae;Narnaviridae_na;Narnaviridae_sp."                      |    |    |    |   |    |   |   |   |   |    |    |      |
| 0                                                                                                                          | 0  | 0  | 2  | 0 | 0  | 0 | 0 | 0 | 0 | 0  | 0  | 0    |
| 0                                                                                                                          | 0  | 0  | 0  | 0 | 0  | 0 | 0 | 0 | 0 | 0  | 0  | 0    |
| 0                                                                                                                          | 0  | 0  | 0  | 0 | 0  | 0 | 0 | 0 | 0 | 0  | 0  | 0    |
| 0                                                                                                                          | 0  | 0  | 0  | 0 | 0  | 0 | 0 | 0 | 0 | 0  | 0  | 0    |

|                                                                                                                                    |   |   |   |   |   |   |   |    |   |   |   |   |
|------------------------------------------------------------------------------------------------------------------------------------|---|---|---|---|---|---|---|----|---|---|---|---|
|                                                                                                                                    | 0 | 0 | 0 | 0 | 0 | 0 | 0 | 0  | 0 | 0 | 0 | 0 |
|                                                                                                                                    | 0 | 0 | 0 | 0 | 0 | 0 | 0 |    |   |   |   |   |
| "Viruses;Lenarviricota;Howeltoviricetes;Cryppavirales;Mitoviridae;Mitoviridae__na;Mitoviridae_sp."                                 |   |   |   |   |   |   |   |    |   |   |   | 0 |
|                                                                                                                                    | 0 | 0 | 0 | 0 | 0 | 0 | 0 | 2  | 0 | 0 | 0 | 0 |
|                                                                                                                                    | 0 | 0 | 0 | 0 | 0 | 0 | 0 | 0  | 0 | 0 | 0 | 0 |
|                                                                                                                                    | 0 | 0 | 0 | 0 | 0 | 0 | 0 | 0  | 0 | 0 | 0 | 1 |
|                                                                                                                                    | 0 | 0 | 0 | 0 | 0 | 0 | 0 | 0  | 0 | 0 | 1 | 0 |
|                                                                                                                                    | 0 | 0 | 0 | 0 | 0 | 0 | 0 | 0  | 0 | 0 | 0 | 0 |
|                                                                                                                                    | 0 | 0 | 0 | 0 | 0 | 0 |   |    |   |   |   |   |
| "Viruses;Negarnaviricota;Insthoviricetes;Articulavirales;Orthomyxoviridae;Alphainfluenzavirus;Influenza_A_virus"                   | 0 | 0 | 2 | 0 | 0 | 0 | 0 | 0  | 0 | 3 | 0 | 0 |
|                                                                                                                                    | 0 | 0 | 0 | 0 | 0 | 0 | 0 | 0  | 0 | 0 | 0 | 0 |
|                                                                                                                                    | 0 | 0 | 0 | 0 | 0 | 0 | 0 | 0  | 0 | 0 | 0 | 0 |
|                                                                                                                                    | 0 | 0 | 1 | 0 | 0 | 0 | 0 | 14 | 0 | 0 | 0 | 0 |
|                                                                                                                                    | 0 | 0 | 0 | 0 | 0 | 0 | 0 | 0  | 0 | 0 | 0 | 0 |
|                                                                                                                                    | 0 | 0 | 0 | 0 | 1 | 1 | 0 |    |   |   |   |   |
| "Viruses;Negarnaviricota;Monjiviricetes;Mononegavirales;Pneumoviridae;Orthopneumovirus;Bovine_orthopneumovirus"                    | 0 | 0 | 0 | 0 | 0 | 0 | 0 | 0  | 0 | 0 | 0 | 0 |
|                                                                                                                                    | 0 | 0 | 0 | 0 | 0 | 0 | 0 | 0  | 0 | 0 | 0 | 0 |
|                                                                                                                                    | 0 | 0 | 0 | 0 | 0 | 0 | 0 | 0  | 0 | 0 | 0 | 0 |
|                                                                                                                                    | 0 | 0 | 0 | 0 | 0 | 0 | 0 | 0  | 0 | 0 | 0 | 0 |
|                                                                                                                                    | 0 | 0 | 0 | 0 | 0 | 0 | 0 | 0  | 0 | 6 | 0 | 0 |
|                                                                                                                                    | 0 | 0 | 0 | 0 | 0 | 0 | 0 |    |   |   |   |   |
| "Viruses;Negarnaviricota;Monjiviricetes;Mononegavirales;Rhabdoviridae;Rhabdoviridae__na;Wheat_rosette_sunt_virus"                  | 0 | 0 | 0 | 0 | 0 | 0 | 0 | 0  | 0 | 2 | 0 | 0 |
|                                                                                                                                    | 0 | 0 | 0 | 0 | 0 | 0 | 0 | 0  | 0 | 0 | 0 | 0 |
|                                                                                                                                    | 0 | 0 | 0 | 0 | 0 | 0 | 0 | 0  | 0 | 0 | 0 | 0 |
|                                                                                                                                    | 0 | 0 | 0 | 0 | 0 | 0 | 0 | 0  | 0 | 0 | 0 | 0 |
|                                                                                                                                    | 0 | 0 | 0 | 0 | 0 | 0 | 0 | 0  | 0 | 0 | 0 | 0 |
|                                                                                                                                    | 0 | 0 | 0 | 0 | 0 | 0 | 0 |    |   |   |   |   |
| "Viruses;Nucleocytoviricota;Megaviricetes;Algavirales;Phycodnaviridae;Chlorovirus;Acanthocystis_turfacea_Chlorella_virus_MN0810.1" |   |   | 0 | 0 | 0 | 0 | 0 | 0  | 0 | 0 | 0 | 0 |
|                                                                                                                                    | 0 | 0 | 0 | 0 | 0 | 0 | 0 | 0  | 0 | 0 | 0 | 0 |
|                                                                                                                                    | 0 | 0 | 0 | 0 | 0 | 0 | 0 | 0  | 0 | 0 | 0 | 0 |
|                                                                                                                                    | 0 | 0 | 0 | 0 | 0 | 0 | 0 | 0  | 0 | 0 | 0 | 0 |
|                                                                                                                                    | 0 | 0 | 0 | 0 | 0 | 0 | 0 | 0  | 0 | 0 | 0 | 0 |
|                                                                                                                                    | 0 | 0 | 0 | 0 | 0 | 0 | 0 | 3  | 0 |   |   |   |
| "Viruses;Nucleocytoviricota;Megaviricetes;Algavirales;Phycodnaviridae;Chlorovirus;Acanthocystis_turfacea_Chlorella_virus_OR0704.3" |   |   | 0 | 0 | 0 | 0 | 0 | 0  | 0 | 0 | 0 | 0 |
|                                                                                                                                    | 0 | 0 | 0 | 0 | 0 | 0 | 0 | 0  | 0 | 0 | 0 | 0 |
|                                                                                                                                    | 0 | 0 | 0 | 0 | 0 | 0 | 0 | 0  | 0 | 0 | 0 | 0 |
|                                                                                                                                    | 0 | 0 | 0 | 0 | 0 | 0 | 0 | 0  | 0 | 0 | 2 | 0 |
|                                                                                                                                    | 0 | 0 | 0 | 0 | 0 | 0 | 0 | 0  | 0 | 0 | 0 | 0 |
|                                                                                                                                    | 0 | 0 | 0 | 0 | 0 | 0 | 0 | 0  | 0 |   |   |   |
| "Viruses;Nucleocytoviricota;Megaviricetes;Algavirales;Phycodnaviridae;Chlorovirus;Chlorovirus__uc"                                 |   |   |   |   |   |   |   |    |   |   |   | 0 |
|                                                                                                                                    | 1 | 0 | 3 | 1 | 2 | 0 | 0 | 0  | 0 | 0 | 0 | 0 |
|                                                                                                                                    | 0 | 0 | 0 | 0 | 0 | 0 | 0 | 0  | 0 | 0 | 0 | 0 |
|                                                                                                                                    | 0 | 0 | 0 | 0 | 0 | 0 | 0 | 0  | 0 | 0 | 0 | 0 |
|                                                                                                                                    | 0 | 0 | 0 | 0 | 0 | 0 | 1 | 0  | 0 | 0 | 0 | 0 |

[illegible]

[illegible]

[illegible]

[illegible]



[illegible]

|                                                                                                                              |   |   |   |   |   |   |   |   |    |   |   |   |
|------------------------------------------------------------------------------------------------------------------------------|---|---|---|---|---|---|---|---|----|---|---|---|
| 0                                                                                                                            | 0 | 0 | 0 | 0 | 0 | 0 | 0 | 0 | 0  | 0 | 0 | 0 |
| 0                                                                                                                            | 0 | 0 | 0 | 0 | 0 | 0 | 0 |   |    |   |   |   |
| "Viruses;Phixviricota;Malgrandaviricetes;Petitvirales;Microviridae;Microviridae__na;Apis_mellifera_associated_microvirus_18" | 0 | 0 | 0 | 0 | 1 | 0 | 0 | 0 | 0  | 0 | 0 | 0 |
| 0                                                                                                                            | 0 | 0 | 0 | 0 | 0 | 0 | 0 | 0 | 0  | 0 | 0 | 0 |
| 0                                                                                                                            | 0 | 0 | 0 | 0 | 0 | 0 | 0 | 0 | 0  | 0 | 0 | 0 |
| 0                                                                                                                            | 0 | 0 | 0 | 0 | 0 | 0 | 0 | 0 | 0  | 0 | 0 | 0 |
| 0                                                                                                                            | 0 | 0 | 0 | 0 | 0 | 0 | 0 | 0 | 0  | 0 | 0 | 0 |
| 0                                                                                                                            | 0 | 0 | 0 | 0 | 0 | 0 | 0 |   |    |   |   |   |
| "Viruses;Phixviricota;Malgrandaviricetes;Petitvirales;Microviridae;Microviridae__na;Apis_mellifera_associated_microvirus_19" | 0 | 0 | 0 | 0 | 0 | 4 | 0 | 0 | 0  | 0 | 0 | 0 |
| 0                                                                                                                            | 0 | 0 | 0 | 0 | 0 | 0 | 0 | 0 | 0  | 0 | 0 | 0 |
| 0                                                                                                                            | 0 | 0 | 0 | 0 | 0 | 0 | 0 | 0 | 0  | 0 | 0 | 0 |
| 0                                                                                                                            | 0 | 0 | 0 | 0 | 0 | 0 | 0 | 0 | 10 | 0 | 0 | 0 |
| 0                                                                                                                            | 0 | 0 | 0 | 0 | 0 | 0 | 0 | 0 | 0  | 0 | 0 | 0 |
| 0                                                                                                                            | 0 | 0 | 0 | 0 | 0 | 0 | 0 |   |    |   |   |   |
| "Viruses;Phixviricota;Malgrandaviricetes;Petitvirales;Microviridae;Microviridae__na;Apis_mellifera_associated_microvirus_2"  | 0 | 0 | 0 | 1 | 2 | 1 | 0 | 0 | 0  | 0 | 0 | 0 |
| 0                                                                                                                            | 0 | 0 | 0 | 0 | 0 | 0 | 0 | 0 | 0  | 0 | 0 | 0 |
| 0                                                                                                                            | 0 | 0 | 0 | 0 | 0 | 0 | 0 | 0 | 0  | 0 | 0 | 0 |
| 0                                                                                                                            | 0 | 0 | 0 | 0 | 0 | 0 | 0 | 0 | 1  | 0 | 0 | 0 |
| 0                                                                                                                            | 0 | 0 | 0 | 0 | 0 | 0 | 0 | 0 | 0  | 0 | 0 | 0 |
| 0                                                                                                                            | 0 | 0 | 0 | 0 | 0 | 0 | 0 |   |    |   |   |   |
| "Viruses;Phixviricota;Malgrandaviricetes;Petitvirales;Microviridae;Microviridae__na;Apis_mellifera_associated_microvirus_20" | 0 | 0 | 0 | 1 | 0 | 1 | 0 | 0 | 0  | 0 | 0 | 0 |
| 0                                                                                                                            | 0 | 0 | 0 | 0 | 0 | 0 | 0 | 0 | 0  | 0 | 0 | 0 |
| 0                                                                                                                            | 0 | 0 | 0 | 0 | 0 | 0 | 0 | 0 | 0  | 0 | 0 | 0 |
| 0                                                                                                                            | 0 | 0 | 0 | 0 | 0 | 0 | 0 | 0 | 0  | 0 | 0 | 0 |
| 0                                                                                                                            | 0 | 0 | 0 | 0 | 0 | 0 | 0 | 0 | 0  | 0 | 0 | 0 |
| 0                                                                                                                            | 0 | 0 | 0 | 0 | 0 | 0 | 0 |   |    |   |   |   |
| "Viruses;Phixviricota;Malgrandaviricetes;Petitvirales;Microviridae;Microviridae__na;Apis_mellifera_associated_microvirus_21" | 0 | 0 | 0 | 0 | 0 | 1 | 0 | 0 | 0  | 0 | 0 | 0 |
| 0                                                                                                                            | 0 | 0 | 0 | 0 | 0 | 0 | 0 | 0 | 0  | 0 | 0 | 0 |
| 0                                                                                                                            | 0 | 0 | 0 | 0 | 0 | 0 | 0 | 0 | 0  | 0 | 0 | 0 |
| 0                                                                                                                            | 0 | 0 | 0 | 0 | 0 | 0 | 0 | 0 | 1  | 0 | 0 | 0 |
| 0                                                                                                                            | 0 | 0 | 0 | 0 | 0 | 0 | 0 | 0 | 0  | 0 | 0 | 0 |
| 0                                                                                                                            | 0 | 0 | 0 | 0 | 0 | 1 | 0 |   |    |   |   |   |
| "Viruses;Phixviricota;Malgrandaviricetes;Petitvirales;Microviridae;Microviridae__na;Apis_mellifera_associated_microvirus_22" | 0 | 0 | 0 | 0 | 2 | 7 | 0 | 0 | 0  | 0 | 0 | 0 |
| 0                                                                                                                            | 0 | 0 | 0 | 0 | 0 | 0 | 0 | 0 | 0  | 0 | 0 | 0 |
| 0                                                                                                                            | 0 | 0 | 0 | 0 | 0 | 0 | 0 | 0 | 0  | 0 | 0 | 0 |
| 0                                                                                                                            | 0 | 0 | 0 | 0 | 0 | 0 | 0 | 0 | 0  | 0 | 0 | 0 |
| 0                                                                                                                            | 0 | 0 | 0 | 0 | 0 | 0 | 0 | 0 | 0  | 0 | 0 | 0 |
| 0                                                                                                                            | 0 | 0 | 0 | 0 | 0 | 0 | 0 |   |    |   |   |   |
| "Viruses;Phixviricota;Malgrandaviricetes;Petitvirales;Microviridae;Microviridae__na;Apis_mellifera_associated_microvirus_23" | 0 | 0 | 0 | 0 | 6 | 3 | 0 | 0 | 0  | 0 | 0 | 0 |
| 0                                                                                                                            | 0 | 0 | 0 | 0 | 0 | 0 | 0 | 0 | 0  | 0 | 0 | 0 |
| 0                                                                                                                            | 0 | 0 | 0 | 0 | 0 | 0 | 0 | 0 | 0  | 0 | 0 | 0 |
| 0                                                                                                                            | 0 | 0 | 0 | 0 | 0 | 0 | 0 | 0 | 1  | 0 | 0 | 0 |

|                                                                                                                              |   |   |   |   |    |    |   |   |   |   |   |   |
|------------------------------------------------------------------------------------------------------------------------------|---|---|---|---|----|----|---|---|---|---|---|---|
| 0                                                                                                                            | 0 | 0 | 0 | 0 | 0  | 0  | 0 | 0 | 0 | 0 | 0 | 0 |
| 0                                                                                                                            | 0 | 0 | 0 | 0 | 0  | 0  | 0 |   |   |   |   |   |
| "Viruses;Phixviricota;Malgrandaviricetes;Petitvirales;Microviridae;Microviridae__na;Apis_mellifera_associated_microvirus_24" | 0 | 0 | 0 | 0 | 0  | 3  | 0 | 0 | 0 | 0 | 0 | 0 |
| 0                                                                                                                            | 0 | 0 | 0 | 0 | 0  | 0  | 0 | 0 | 0 | 0 | 0 | 0 |
| 0                                                                                                                            | 0 | 0 | 0 | 0 | 0  | 0  | 0 | 0 | 0 | 0 | 0 | 0 |
| 0                                                                                                                            | 0 | 0 | 0 | 0 | 0  | 0  | 0 | 0 | 0 | 0 | 0 | 0 |
| 0                                                                                                                            | 0 | 0 | 0 | 0 | 0  | 0  | 0 | 0 | 0 | 0 | 0 | 0 |
| 0                                                                                                                            | 0 | 0 | 0 | 0 | 0  | 0  | 0 |   |   |   |   |   |
| "Viruses;Phixviricota;Malgrandaviricetes;Petitvirales;Microviridae;Microviridae__na;Apis_mellifera_associated_microvirus_25" | 0 | 0 | 0 | 0 | 0  | 1  | 0 | 0 | 0 | 0 | 0 | 0 |
| 0                                                                                                                            | 0 | 0 | 0 | 0 | 0  | 0  | 0 | 0 | 0 | 0 | 0 | 0 |
| 0                                                                                                                            | 0 | 0 | 0 | 0 | 0  | 0  | 0 | 0 | 0 | 0 | 0 | 0 |
| 0                                                                                                                            | 0 | 0 | 0 | 0 | 0  | 0  | 0 | 0 | 0 | 0 | 0 | 0 |
| 0                                                                                                                            | 0 | 0 | 0 | 0 | 0  | 0  | 0 | 0 | 0 | 0 | 0 | 0 |
| 0                                                                                                                            | 0 | 0 | 0 | 0 | 0  | 0  | 0 |   |   |   |   |   |
| "Viruses;Phixviricota;Malgrandaviricetes;Petitvirales;Microviridae;Microviridae__na;Apis_mellifera_associated_microvirus_27" | 0 | 0 | 0 | 0 | 2  | 0  | 0 | 0 | 0 | 0 | 0 | 0 |
| 0                                                                                                                            | 0 | 0 | 0 | 0 | 0  | 0  | 0 | 0 | 0 | 0 | 0 | 0 |
| 0                                                                                                                            | 0 | 0 | 0 | 0 | 0  | 0  | 0 | 0 | 0 | 0 | 0 | 0 |
| 0                                                                                                                            | 0 | 0 | 0 | 0 | 0  | 0  | 0 | 0 | 0 | 0 | 0 | 0 |
| 0                                                                                                                            | 0 | 0 | 0 | 0 | 0  | 0  | 0 | 0 | 0 | 0 | 0 | 0 |
| 0                                                                                                                            | 0 | 0 | 0 | 0 | 0  | 0  | 0 |   |   |   |   |   |
| "Viruses;Phixviricota;Malgrandaviricetes;Petitvirales;Microviridae;Microviridae__na;Apis_mellifera_associated_microvirus_28" | 0 | 0 | 1 | 0 | 3  | 0  | 0 | 0 | 0 | 0 | 0 | 0 |
| 0                                                                                                                            | 0 | 0 | 0 | 0 | 0  | 0  | 0 | 0 | 0 | 0 | 1 | 0 |
| 0                                                                                                                            | 0 | 0 | 0 | 0 | 0  | 0  | 0 | 0 | 0 | 0 | 0 | 0 |
| 0                                                                                                                            | 0 | 0 | 0 | 0 | 0  | 0  | 0 | 0 | 0 | 0 | 0 | 0 |
| 0                                                                                                                            | 0 | 0 | 0 | 0 | 0  | 0  | 0 | 0 | 0 | 0 | 0 | 0 |
| 0                                                                                                                            | 0 | 0 | 0 | 0 | 0  | 0  | 0 |   |   |   |   |   |
| "Viruses;Phixviricota;Malgrandaviricetes;Petitvirales;Microviridae;Microviridae__na;Apis_mellifera_associated_microvirus_29" | 0 | 0 | 1 | 4 | 13 | 10 | 0 | 0 | 0 | 0 | 0 | 0 |
| 0                                                                                                                            | 0 | 0 | 0 | 0 | 0  | 0  | 0 | 0 | 0 | 0 | 0 | 0 |
| 0                                                                                                                            | 0 | 0 | 0 | 0 | 0  | 0  | 0 | 0 | 0 | 0 | 0 | 0 |
| 0                                                                                                                            | 0 | 0 | 0 | 0 | 0  | 0  | 0 | 0 | 1 | 0 | 0 | 0 |
| 0                                                                                                                            | 0 | 0 | 0 | 0 | 0  | 0  | 0 | 0 | 0 | 0 | 0 | 0 |
| 0                                                                                                                            | 0 | 0 | 0 | 0 | 0  | 0  | 0 |   |   |   |   |   |
| "Viruses;Phixviricota;Malgrandaviricetes;Petitvirales;Microviridae;Microviridae__na;Apis_mellifera_associated_microvirus_3"  | 0 | 0 | 0 | 0 | 3  | 0  | 0 | 0 | 0 | 0 | 0 | 0 |
| 0                                                                                                                            | 0 | 0 | 0 | 0 | 0  | 0  | 0 | 0 | 0 | 1 | 0 | 0 |
| 0                                                                                                                            | 0 | 0 | 0 | 0 | 0  | 0  | 0 | 0 | 0 | 0 | 0 | 0 |
| 0                                                                                                                            | 0 | 0 | 0 | 0 | 0  | 0  | 0 | 0 | 0 | 0 | 0 | 0 |
| 0                                                                                                                            | 0 | 0 | 0 | 0 | 0  | 0  | 0 | 0 | 0 | 0 | 0 | 0 |
| 0                                                                                                                            | 0 | 0 | 0 | 0 | 0  | 0  | 0 |   |   |   |   |   |
| "Viruses;Phixviricota;Malgrandaviricetes;Petitvirales;Microviridae;Microviridae__na;Apis_mellifera_associated_microvirus_31" | 0 | 0 | 1 | 3 | 74 | 89 | 0 | 0 | 0 | 0 | 0 | 0 |
| 0                                                                                                                            | 0 | 0 | 0 | 0 | 0  | 0  | 0 | 0 | 0 | 0 | 0 | 0 |
| 0                                                                                                                            | 0 | 0 | 0 | 0 | 0  | 0  | 0 | 0 | 0 | 0 | 0 | 0 |
| 0                                                                                                                            | 0 | 0 | 0 | 0 | 0  | 0  | 0 | 0 | 6 | 0 | 0 | 0 |

[illegible]

|                                                                                                                              |   |   |   |   |    |   |   |   |   |   |   |   |
|------------------------------------------------------------------------------------------------------------------------------|---|---|---|---|----|---|---|---|---|---|---|---|
| 0                                                                                                                            | 0 | 0 | 0 | 0 | 0  | 0 | 0 | 0 | 0 | 0 | 0 | 0 |
| 0                                                                                                                            | 0 | 0 | 0 | 0 | 0  | 0 | 0 |   |   |   |   |   |
| "Viruses;Phixviricota;Malgrandaviricetes;Petitvirales;Microviridae;Microviridae__na;Apis_mellifera_associated_microvirus_49" | 0 | 0 | 2 | 1 | 3  | 0 | 0 | 0 | 0 | 0 | 0 | 0 |
| 0                                                                                                                            | 0 | 0 | 0 | 1 | 0  | 0 | 0 | 0 | 0 | 0 | 1 | 0 |
| 0                                                                                                                            | 0 | 0 | 0 | 0 | 0  | 0 | 0 | 0 | 0 | 0 | 0 | 0 |
| 0                                                                                                                            | 0 | 0 | 1 | 0 | 0  | 0 | 0 | 0 | 0 | 0 | 0 | 0 |
| 0                                                                                                                            | 0 | 0 | 0 | 0 | 0  | 0 | 0 | 0 | 0 | 0 | 0 | 0 |
| 0                                                                                                                            | 0 | 0 | 0 | 0 | 0  | 0 | 0 |   |   |   |   |   |
| "Viruses;Phixviricota;Malgrandaviricetes;Petitvirales;Microviridae;Microviridae__na;Apis_mellifera_associated_microvirus_5"  | 0 | 0 | 0 | 0 | 0  | 1 | 0 | 0 | 0 | 0 | 0 | 0 |
| 0                                                                                                                            | 0 | 0 | 0 | 0 | 0  | 0 | 0 | 0 | 0 | 0 | 0 | 0 |
| 0                                                                                                                            | 0 | 0 | 0 | 0 | 0  | 0 | 0 | 0 | 0 | 0 | 0 | 0 |
| 0                                                                                                                            | 0 | 0 | 0 | 0 | 0  | 0 | 0 | 0 | 0 | 0 | 0 | 0 |
| 0                                                                                                                            | 0 | 0 | 0 | 0 | 0  | 0 | 0 | 0 | 0 | 0 | 0 | 0 |
| 0                                                                                                                            | 0 | 0 | 0 | 0 | 0  | 0 | 0 |   |   |   |   |   |
| "Viruses;Phixviricota;Malgrandaviricetes;Petitvirales;Microviridae;Microviridae__na;Apis_mellifera_associated_microvirus_51" | 0 | 0 | 0 | 0 | 13 | 0 | 0 | 0 | 0 | 0 | 0 | 0 |
| 0                                                                                                                            | 0 | 0 | 0 | 1 | 0  | 0 | 0 | 0 | 0 | 0 | 0 | 0 |
| 0                                                                                                                            | 0 | 0 | 0 | 0 | 0  | 0 | 0 | 0 | 0 | 0 | 0 | 0 |
| 0                                                                                                                            | 0 | 0 | 0 | 0 | 0  | 0 | 0 | 0 | 7 | 0 | 0 | 0 |
| 0                                                                                                                            | 0 | 0 | 0 | 0 | 0  | 0 | 0 | 0 | 0 | 0 | 0 | 0 |
| 0                                                                                                                            | 0 | 0 | 0 | 0 | 0  | 0 | 0 |   |   |   |   |   |
| "Viruses;Phixviricota;Malgrandaviricetes;Petitvirales;Microviridae;Microviridae__na;Apis_mellifera_associated_microvirus_53" | 0 | 0 | 0 | 0 | 1  | 0 | 0 | 0 | 0 | 0 | 0 | 0 |
| 0                                                                                                                            | 0 | 0 | 0 | 0 | 0  | 0 | 0 | 0 | 0 | 0 | 0 | 0 |
| 0                                                                                                                            | 0 | 0 | 0 | 0 | 0  | 0 | 0 | 0 | 0 | 0 | 0 | 0 |
| 0                                                                                                                            | 0 | 0 | 0 | 0 | 0  | 0 | 0 | 0 | 0 | 0 | 0 | 0 |
| 0                                                                                                                            | 0 | 0 | 0 | 0 | 0  | 0 | 0 | 0 | 0 | 0 | 0 | 0 |
| 0                                                                                                                            | 0 | 0 | 0 | 0 | 0  | 0 | 0 |   |   |   |   |   |
| "Viruses;Phixviricota;Malgrandaviricetes;Petitvirales;Microviridae;Microviridae__na;Apis_mellifera_associated_microvirus_58" | 0 | 0 | 0 | 0 | 0  | 2 | 0 | 0 | 0 | 0 | 0 | 0 |
| 0                                                                                                                            | 0 | 0 | 0 | 0 | 0  | 0 | 0 | 0 | 0 | 0 | 0 | 0 |
| 0                                                                                                                            | 0 | 0 | 0 | 0 | 0  | 0 | 0 | 0 | 0 | 0 | 0 | 0 |
| 0                                                                                                                            | 0 | 0 | 0 | 0 | 0  | 0 | 0 | 0 | 0 | 0 | 0 | 0 |
| 0                                                                                                                            | 0 | 0 | 0 | 0 | 0  | 0 | 0 | 0 | 0 | 0 | 0 | 0 |
| 0                                                                                                                            | 0 | 0 | 0 | 0 | 0  | 0 | 0 |   |   |   |   |   |
| "Viruses;Phixviricota;Malgrandaviricetes;Petitvirales;Microviridae;Microviridae__na;Apis_mellifera_associated_microvirus_6"  | 0 | 0 | 0 | 0 | 1  | 0 | 0 | 0 | 0 | 0 | 0 | 0 |
| 0                                                                                                                            | 0 | 0 | 0 | 0 | 0  | 0 | 0 | 0 | 0 | 0 | 0 | 0 |
| 0                                                                                                                            | 0 | 0 | 0 | 0 | 0  | 0 | 0 | 0 | 0 | 0 | 0 | 0 |
| 0                                                                                                                            | 0 | 0 | 0 | 0 | 0  | 0 | 0 | 0 | 0 | 0 | 0 | 0 |
| 0                                                                                                                            | 0 | 0 | 0 | 0 | 0  | 0 | 0 | 0 | 0 | 0 | 0 | 0 |
| 0                                                                                                                            | 0 | 0 | 0 | 0 | 0  | 0 | 0 |   |   |   |   |   |
| "Viruses;Phixviricota;Malgrandaviricetes;Petitvirales;Microviridae;Microviridae__na;Apis_mellifera_associated_microvirus_8"  | 0 | 0 | 0 | 0 | 0  | 0 | 0 | 0 | 0 | 0 | 0 | 0 |
| 0                                                                                                                            | 0 | 0 | 0 | 0 | 0  | 0 | 0 | 0 | 0 | 0 | 0 | 0 |
| 0                                                                                                                            | 0 | 0 | 0 | 0 | 0  | 0 | 0 | 0 | 0 | 0 | 0 | 0 |
| 0                                                                                                                            | 0 | 0 | 0 | 0 | 0  | 0 | 0 | 0 | 1 | 0 | 0 | 0 |

[illegible]

[illegible]

[illegible]



[illegible]

|                                                                                                                      |     |     |     |    |    |   |   |   |   |   |   |   |
|----------------------------------------------------------------------------------------------------------------------|-----|-----|-----|----|----|---|---|---|---|---|---|---|
| 0                                                                                                                    | 0   | 0   | 0   | 0  | 0  | 0 | 0 | 0 | 0 | 0 | 0 | 0 |
| 0                                                                                                                    | 0   | 0   | 0   | 0  | 0  | 0 |   |   |   |   |   |   |
| "Viruses;Phixviricota;Malgrandaviricetes;Petitvirales;Microviridae;Microviridae__na;Gokushovirinae_GNX3R"            |     |     |     |    |    |   |   |   |   |   |   |   |
| 0                                                                                                                    | 0   | 0   | 1   | 2  | 14 | 0 | 0 | 0 | 0 | 0 | 0 | 0 |
| 0                                                                                                                    | 0   | 0   | 0   | 0  | 0  | 0 | 0 | 0 | 5 | 0 | 0 | 0 |
| 0                                                                                                                    | 0   | 0   | 0   | 0  | 0  | 0 | 0 | 0 | 0 | 0 | 0 | 0 |
| 0                                                                                                                    | 0   | 0   | 0   | 0  | 0  | 0 | 0 | 0 | 0 | 0 | 0 | 0 |
| 0                                                                                                                    | 0   | 0   | 0   | 0  | 0  | 0 | 0 | 0 | 0 | 0 | 0 | 0 |
| 0                                                                                                                    | 0   | 0   | 0   | 0  | 1  | 0 |   |   |   |   |   |   |
| "Viruses;Phixviricota;Malgrandaviricetes;Petitvirales;Microviridae;Microviridae__na;Gokushovirinae_sp."              |     |     |     |    |    |   |   |   |   |   |   |   |
| 0                                                                                                                    | 0   | 0   | 2   | 0  | 7  | 0 | 0 | 0 | 0 | 0 | 0 | 0 |
| 0                                                                                                                    | 18  | 15  | 97  | 0  | 0  | 0 | 0 | 0 | 1 | 0 | 0 | 0 |
| 1                                                                                                                    | 0   | 0   | 0   | 0  | 0  | 0 | 0 | 0 | 1 | 0 | 0 | 0 |
| 0                                                                                                                    | 0   | 0   | 0   | 0  | 3  | 1 | 0 | 5 | 0 | 0 | 0 | 0 |
| 1                                                                                                                    | 128 | 1   | 0   | 0  | 0  | 0 | 0 | 0 | 0 | 0 | 0 | 0 |
| 0                                                                                                                    | 0   | 0   | 4   | 4  | 0  | 0 |   |   |   |   |   |   |
| "Viruses;Phixviricota;Malgrandaviricetes;Petitvirales;Microviridae;Microviridae__na;Gokushovirus_WZ-2015a"           |     |     |     |    |    |   |   |   |   |   |   |   |
| 0                                                                                                                    | 0   | 0   | 3   | 5  | 16 | 0 | 0 | 1 | 0 | 0 | 0 | 1 |
| 0                                                                                                                    | 10  | 11  | 25  | 1  | 1  | 0 | 0 | 0 | 2 | 0 | 5 | 1 |
| 865                                                                                                                  | 181 | 293 | 350 | 0  | 0  | 0 | 0 | 1 | 2 | 1 | 0 | 0 |
| 0                                                                                                                    | 1   | 14  | 0   | 0  | 2  | 0 | 0 | 1 | 0 | 0 | 0 | 0 |
| 2                                                                                                                    | 938 | 0   | 2   | 0  | 0  | 0 | 0 | 0 | 0 | 0 | 0 | 0 |
| 0                                                                                                                    | 0   | 0   | 17  | 9  | 0  | 0 |   |   |   |   |   |   |
| "Viruses;Phixviricota;Malgrandaviricetes;Petitvirales;Microviridae;Microviridae__na;Human_gut_gokushovirus"          |     |     |     |    |    |   |   |   |   |   |   |   |
| 0                                                                                                                    | 0   | 0   | 0   | 7  | 9  | 0 | 0 | 0 | 0 | 0 | 0 | 0 |
| 0                                                                                                                    | 1   | 0   | 1   | 0  | 0  | 0 | 0 | 0 | 0 | 0 | 0 | 0 |
| 1                                                                                                                    | 0   | 0   | 3   | 0  | 0  | 0 | 0 | 0 | 0 | 0 | 0 | 0 |
| 0                                                                                                                    | 0   | 0   | 0   | 0  | 0  | 0 | 0 | 0 | 0 | 0 | 0 | 0 |
| 0                                                                                                                    | 190 | 0   | 0   | 0  | 0  | 0 | 0 | 0 | 0 | 0 | 0 | 0 |
| 0                                                                                                                    | 0   | 0   | 5   | 2  | 0  | 0 |   |   |   |   |   |   |
| "Viruses;Phixviricota;Malgrandaviricetes;Petitvirales;Microviridae;Microviridae__na;Human_gut_microviridae_SH-CHD12" |     |     |     |    |    |   |   |   |   |   |   |   |
| 0                                                                                                                    | 0   | 0   | 0   | 0  | 0  | 0 | 0 | 0 | 0 | 0 | 0 | 0 |
| 0                                                                                                                    | 0   | 12  | 19  | 42 | 0  | 0 | 0 | 0 | 0 | 0 | 0 | 0 |
| 0                                                                                                                    | 0   | 0   | 0   | 0  | 0  | 0 | 0 | 0 | 0 | 0 | 0 | 0 |
| 0                                                                                                                    | 0   | 0   | 0   | 0  | 0  | 0 | 0 | 0 | 0 | 0 | 0 | 0 |
| 0                                                                                                                    | 0   | 0   | 0   | 0  | 0  | 0 | 0 | 0 | 0 | 0 | 0 | 0 |
| 0                                                                                                                    | 0   | 0   | 0   | 0  | 0  | 0 | 0 |   |   |   |   |   |
| "Viruses;Phixviricota;Malgrandaviricetes;Petitvirales;Microviridae;Microviridae__na;Kummerowia_striata_gokushovirus" |     |     |     |    |    |   |   |   |   |   |   |   |
| 0                                                                                                                    | 0   | 0   | 1   | 2  | 32 | 2 | 0 | 0 | 0 | 0 | 0 | 0 |
| 0                                                                                                                    | 0   | 0   | 0   | 0  | 0  | 0 | 0 | 0 | 0 | 0 | 0 | 0 |
| 0                                                                                                                    | 0   | 0   | 0   | 0  | 0  | 0 | 0 | 0 | 0 | 0 | 0 | 0 |
| 0                                                                                                                    | 0   | 1   | 0   | 0  | 0  | 0 | 0 | 0 | 1 | 0 | 0 | 0 |
| 0                                                                                                                    | 0   | 0   | 0   | 0  | 0  | 0 | 0 | 0 | 0 | 0 | 0 | 0 |
| 0                                                                                                                    | 0   | 0   | 0   | 0  | 0  | 0 | 0 |   |   |   |   |   |
| "Viruses;Phixviricota;Malgrandaviricetes;Petitvirales;Microviridae;Microviridae__na;Marine_gokushovirus"             |     |     |     |    |    |   |   |   |   |   |   |   |
| 0                                                                                                                    | 0   | 0   | 1   | 28 | 0  | 0 | 0 | 0 | 0 | 0 | 0 | 0 |
| 0                                                                                                                    | 0   | 0   | 0   | 0  | 0  | 0 | 0 | 0 | 0 | 0 | 0 | 0 |
| 0                                                                                                                    | 0   | 0   | 0   | 0  | 0  | 0 | 0 | 0 | 0 | 0 | 0 | 0 |
| 0                                                                                                                    | 0   | 0   | 0   | 0  | 0  | 0 | 0 | 3 | 0 | 0 | 0 | 0 |

[illegible]

[illegible]

[illegible]

|                                                                                                               |   |   |   |   |    |   |   |   |   |   |   |   |
|---------------------------------------------------------------------------------------------------------------|---|---|---|---|----|---|---|---|---|---|---|---|
| 0                                                                                                             | 0 | 0 | 0 | 0 | 0  | 0 | 0 | 0 | 0 | 0 | 0 | 0 |
| 0                                                                                                             | 0 | 0 | 0 | 0 | 0  | 0 |   |   |   |   |   |   |
| "Viruses;Phixviricota;Malgrandaviricetes;Petitvirales;Microviridae;Microviridae__na;Microviridae_sp._ctkQD1"  |   |   |   |   |    |   |   |   |   |   |   |   |
| 0                                                                                                             | 0 | 0 | 0 | 7 | 16 | 0 | 0 | 0 | 0 | 0 | 0 | 0 |
| 0                                                                                                             | 0 | 0 | 0 | 0 | 0  | 0 | 0 | 0 | 0 | 2 | 0 | 0 |
| 0                                                                                                             | 0 | 0 | 0 | 0 | 0  | 0 | 0 | 0 | 0 | 0 | 0 | 0 |
| 0                                                                                                             | 0 | 0 | 0 | 0 | 1  | 0 | 0 | 2 | 0 | 0 | 0 | 0 |
| 0                                                                                                             | 0 | 0 | 0 | 0 | 0  | 0 | 0 | 0 | 0 | 0 | 0 | 0 |
| 0                                                                                                             | 0 | 0 | 0 | 0 | 2  | 0 |   |   |   |   |   |   |
| "Viruses;Phixviricota;Malgrandaviricetes;Petitvirales;Microviridae;Microviridae__na;Microviridae_sp._ctKRd3"  |   |   |   |   |    |   |   |   |   |   |   |   |
| 0                                                                                                             | 0 | 0 | 0 | 0 | 0  | 0 | 0 | 0 | 0 | 0 | 0 | 0 |
| 0                                                                                                             | 6 | 7 | 4 | 0 | 0  | 0 | 0 | 0 | 1 | 2 | 0 | 0 |
| 1                                                                                                             | 0 | 0 | 0 | 0 | 0  | 0 | 0 | 0 | 0 | 0 | 0 | 0 |
| 0                                                                                                             | 0 | 0 | 0 | 0 | 0  | 0 | 0 | 0 | 0 | 0 | 0 | 0 |
| 0                                                                                                             | 0 | 0 | 0 | 0 | 0  | 0 | 0 | 1 | 0 | 2 | 5 | 1 |
| 0                                                                                                             | 0 | 0 | 0 | 0 | 0  | 0 |   |   |   |   |   |   |
| "Viruses;Phixviricota;Malgrandaviricetes;Petitvirales;Microviridae;Microviridae__na;Microviridae_sp._ctlXB4"  |   |   |   |   |    |   |   |   |   |   |   |   |
| 0                                                                                                             | 0 | 0 | 0 | 0 | 0  | 0 | 0 | 0 | 0 | 0 | 0 | 0 |
| 0                                                                                                             | 0 | 0 | 0 | 0 | 0  | 0 | 0 | 0 | 0 | 0 | 0 | 0 |
| 0                                                                                                             | 0 | 0 | 0 | 0 | 0  | 0 | 0 | 0 | 0 | 0 | 0 | 0 |
| 0                                                                                                             | 0 | 0 | 0 | 0 | 0  | 0 | 0 | 0 | 0 | 0 | 0 | 0 |
| 1                                                                                                             | 0 | 0 | 0 | 0 | 0  | 0 | 0 | 0 | 0 | 0 | 0 | 0 |
| 0                                                                                                             | 0 | 0 | 0 | 0 | 0  | 0 |   |   |   |   |   |   |
| "Viruses;Phixviricota;Malgrandaviricetes;Petitvirales;Microviridae;Microviridae__na;Microviridae_sp._ctMli2"  |   |   |   |   |    |   |   |   |   |   |   |   |
| 0                                                                                                             | 0 | 2 | 0 | 0 | 0  | 0 | 0 | 0 | 0 | 0 | 0 | 0 |
| 0                                                                                                             | 0 | 0 | 0 | 0 | 0  | 0 | 0 | 0 | 0 | 0 | 0 | 0 |
| 0                                                                                                             | 0 | 0 | 0 | 0 | 0  | 0 | 0 | 0 | 0 | 0 | 0 | 0 |
| 0                                                                                                             | 0 | 0 | 0 | 0 | 0  | 0 | 0 | 0 | 0 | 0 | 0 | 0 |
| 0                                                                                                             | 0 | 0 | 0 | 0 | 0  | 0 | 0 | 0 | 0 | 0 | 0 | 0 |
| 0                                                                                                             | 0 | 0 | 0 | 0 | 0  | 0 |   |   |   |   |   |   |
| "Viruses;Phixviricota;Malgrandaviricetes;Petitvirales;Microviridae;Microviridae__na;Microviridae_sp._ctNWS1"  |   |   |   |   |    |   |   |   |   |   |   |   |
| 0                                                                                                             | 0 | 0 | 0 | 0 | 0  | 0 | 0 | 0 | 0 | 0 | 0 | 3 |
| 3                                                                                                             | 1 | 2 | 1 | 4 | 0  | 0 | 0 | 0 | 0 | 0 | 0 | 0 |
| 0                                                                                                             | 0 | 0 | 0 | 0 | 0  | 0 | 0 | 0 | 0 | 0 | 0 | 0 |
| 0                                                                                                             | 0 | 0 | 0 | 0 | 0  | 0 | 0 | 0 | 0 | 0 | 0 | 0 |
| 0                                                                                                             | 0 | 0 | 0 | 0 | 0  | 0 | 0 | 0 | 1 | 0 | 0 | 0 |
| 0                                                                                                             | 3 | 1 | 0 | 0 | 0  | 0 |   |   |   |   |   |   |
| "Viruses;Phixviricota;Malgrandaviricetes;Petitvirales;Microviridae;Microviridae__na;Microviridae_sp._ctOkR17" |   |   |   |   |    |   |   |   |   |   |   |   |
| "                                                                                                             | 0 | 0 | 0 | 0 | 0  | 0 | 0 | 0 | 0 | 0 | 0 | 0 |
|                                                                                                               | 0 | 0 | 0 | 0 | 0  | 0 | 0 | 0 | 0 | 0 | 0 | 0 |
|                                                                                                               | 0 | 0 | 0 | 0 | 0  | 0 | 0 | 0 | 0 | 0 | 0 | 0 |
|                                                                                                               | 0 | 0 | 0 | 0 | 0  | 0 | 0 | 0 | 0 | 0 | 0 | 0 |
|                                                                                                               | 0 | 0 | 0 | 0 | 0  | 0 | 0 | 0 | 0 | 0 | 1 | 0 |
|                                                                                                               | 0 | 0 | 0 | 0 | 0  | 0 |   |   |   |   |   |   |
| "Viruses;Phixviricota;Malgrandaviricetes;Petitvirales;Microviridae;Microviridae__na;Microviridae_sp._ctOsc38" |   |   |   |   |    |   |   |   |   |   |   |   |
| 0                                                                                                             | 0 | 0 | 2 | 0 | 5  | 0 | 0 | 0 | 0 | 0 | 0 | 0 |
| 0                                                                                                             | 0 | 0 | 0 | 0 | 0  | 0 | 0 | 0 | 0 | 0 | 0 | 0 |
| 0                                                                                                             | 0 | 0 | 0 | 0 | 0  | 0 | 0 | 0 | 0 | 0 | 0 | 1 |
| 0                                                                                                             | 0 | 0 | 0 | 0 | 0  | 0 | 0 | 1 | 0 | 0 | 0 | 0 |

[illegible]

[illegible]



[illegible]

[illegible]

|                                                                                                               |   |   |    |    |    |   |   |   |   |   |   |   |
|---------------------------------------------------------------------------------------------------------------|---|---|----|----|----|---|---|---|---|---|---|---|
|                                                                                                               | 0 | 0 | 0  | 0  | 0  | 0 | 0 | 0 | 0 | 0 | 0 | 0 |
|                                                                                                               | 0 | 0 | 0  | 0  | 0  | 0 | 0 |   |   |   |   |   |
| "Viruses;Phixviricota;Malgrandaviricetes;Petitvirales;Microviridae;Microviridae__na;Peromfec_virus_RodF8_36"  |   |   |    |    |    |   |   |   |   |   |   |   |
| "                                                                                                             | 0 | 0 | 0  | 0  | 1  | 0 | 0 | 0 | 0 | 0 | 0 | 0 |
|                                                                                                               | 0 | 0 | 0  | 0  | 0  | 0 | 0 | 0 | 0 | 0 | 0 | 0 |
|                                                                                                               | 0 | 0 | 0  | 0  | 0  | 0 | 0 | 0 | 0 | 0 | 0 | 0 |
|                                                                                                               | 0 | 0 | 0  | 0  | 0  | 0 | 0 | 3 | 0 | 0 | 0 | 0 |
|                                                                                                               | 0 | 0 | 0  | 0  | 0  | 0 | 0 | 0 | 0 | 0 | 0 | 0 |
|                                                                                                               | 0 | 0 | 0  | 0  | 0  | 0 | 0 |   |   |   |   |   |
| "Viruses;Phixviricota;Malgrandaviricetes;Petitvirales;Microviridae;Microviridae__na;Peromfec_virus_RodF8_38"  |   |   |    |    |    |   |   |   |   |   |   |   |
| "                                                                                                             | 0 | 0 | 0  | 0  | 0  | 0 | 0 | 0 | 0 | 0 | 0 | 0 |
|                                                                                                               | 0 | 0 | 0  | 0  | 0  | 0 | 0 | 0 | 0 | 0 | 0 | 0 |
|                                                                                                               | 0 | 0 | 0  | 0  | 0  | 0 | 0 | 0 | 0 | 0 | 0 | 0 |
|                                                                                                               | 0 | 0 | 1  | 0  | 0  | 0 | 0 | 0 | 0 | 0 | 0 | 0 |
|                                                                                                               | 1 | 0 | 0  | 0  | 0  | 0 | 0 | 0 | 0 | 0 | 0 | 0 |
|                                                                                                               | 0 | 0 | 0  | 0  | 0  | 0 | 0 |   |   |   |   |   |
| "Viruses;Phixviricota;Malgrandaviricetes;Petitvirales;Microviridae;Microviridae__na;Poophage_MBI-2016a"       |   |   |    |    |    |   |   |   |   |   |   |   |
|                                                                                                               | 0 | 0 | 0  | 0  | 0  | 0 | 0 | 0 | 0 | 0 | 0 | 0 |
|                                                                                                               | 0 | 9 | 16 | 84 | 0  | 0 | 0 | 0 | 1 | 0 | 0 | 0 |
|                                                                                                               | 0 | 0 | 0  | 0  | 0  | 0 | 0 | 0 | 0 | 0 | 0 | 0 |
|                                                                                                               | 0 | 0 | 0  | 0  | 0  | 0 | 0 | 0 | 0 | 0 | 0 | 0 |
|                                                                                                               | 0 | 0 | 0  | 0  | 0  | 0 | 0 | 0 | 0 | 0 | 0 | 0 |
|                                                                                                               | 0 | 0 | 0  | 0  | 0  | 0 | 0 |   |   |   |   |   |
| "Viruses;Phixviricota;Malgrandaviricetes;Petitvirales;Microviridae;Microviridae__na;Poophage_SC_4_H6H8_20"    |   |   |    |    |    |   |   |   |   |   |   |   |
| 17"                                                                                                           | 0 | 0 | 0  | 0  | 0  | 0 | 0 | 0 | 0 | 0 | 0 | 0 |
|                                                                                                               | 0 | 3 | 7  | 17 | 0  | 0 | 0 | 0 | 0 | 0 | 0 | 0 |
|                                                                                                               | 0 | 0 | 0  | 0  | 0  | 0 | 0 | 0 | 0 | 0 | 0 | 0 |
|                                                                                                               | 0 | 0 | 0  | 0  | 0  | 0 | 0 | 0 | 0 | 0 | 0 | 0 |
|                                                                                                               | 1 | 0 | 0  | 0  | 0  | 0 | 0 | 0 | 0 | 0 | 0 | 0 |
|                                                                                                               | 0 | 0 | 0  | 0  | 0  | 0 | 0 |   |   |   |   |   |
| "Viruses;Phixviricota;Malgrandaviricetes;Petitvirales;Microviridae;Microviridae__na;robinz_microvirus_RP_103" |   |   |    |    |    |   |   |   |   |   |   |   |
| "                                                                                                             | 0 | 0 | 0  | 0  | 6  | 0 | 0 | 0 | 0 | 0 | 0 | 0 |
|                                                                                                               | 0 | 0 | 0  | 0  | 0  | 0 | 0 | 0 | 0 | 0 | 0 | 0 |
|                                                                                                               | 0 | 0 | 0  | 0  | 0  | 0 | 0 | 0 | 0 | 0 | 0 | 0 |
|                                                                                                               | 0 | 0 | 0  | 0  | 0  | 0 | 0 | 0 | 0 | 0 | 0 | 0 |
|                                                                                                               | 0 | 0 | 0  | 0  | 0  | 0 | 0 | 0 | 0 | 0 | 0 | 0 |
|                                                                                                               | 0 | 0 | 0  | 0  | 0  | 0 | 0 |   |   |   |   |   |
| "Viruses;Phixviricota;Malgrandaviricetes;Petitvirales;Microviridae;Microviridae__na;robinz_microvirus_RP_105" |   |   |    |    |    |   |   |   |   |   |   |   |
| "                                                                                                             | 0 | 0 | 0  | 0  | 0  | 0 | 0 | 0 | 0 | 0 | 0 | 0 |
|                                                                                                               | 0 | 0 | 0  | 0  | 0  | 0 | 0 | 0 | 0 | 0 | 0 | 0 |
|                                                                                                               | 0 | 0 | 0  | 0  | 0  | 0 | 0 | 0 | 0 | 0 | 0 | 0 |
|                                                                                                               | 0 | 0 | 0  | 0  | 0  | 0 | 0 | 1 | 0 | 0 | 0 | 0 |
|                                                                                                               | 0 | 0 | 0  | 0  | 0  | 0 | 0 | 0 | 0 | 0 | 0 | 0 |
|                                                                                                               | 0 | 0 | 0  | 0  | 0  | 0 | 0 |   |   |   |   |   |
| "Viruses;Phixviricota;Malgrandaviricetes;Petitvirales;Microviridae;Microviridae__na;robinz_microvirus_RP_111" |   |   |    |    |    |   |   |   |   |   |   |   |
| "                                                                                                             | 0 | 0 | 0  | 0  | 18 | 0 | 0 | 0 | 0 | 0 | 0 | 0 |
|                                                                                                               | 0 | 0 | 0  | 0  | 0  | 0 | 0 | 0 | 0 | 0 | 0 | 0 |
|                                                                                                               | 0 | 0 | 0  | 0  | 0  | 0 | 0 | 0 | 0 | 0 | 0 | 0 |
|                                                                                                               | 0 | 0 | 0  | 0  | 0  | 1 | 0 | 0 | 0 | 0 | 0 | 0 |



[illegible]

[illegible]

[illegible]

|                                                                                                                           |   |   |   |    |    |   |   |   |   |   |   |   |
|---------------------------------------------------------------------------------------------------------------------------|---|---|---|----|----|---|---|---|---|---|---|---|
| 0                                                                                                                         | 0 | 0 | 0 | 0  | 0  | 0 | 0 | 0 | 0 | 0 | 0 | 0 |
| 0                                                                                                                         | 0 | 0 | 0 | 0  | 0  | 0 |   |   |   |   |   |   |
| "Viruses;Phixviricota;Malgrandaviricetes;Petitvirales;Microviridae;Microviridae__na;Tortoise_microvirus_88"               |   |   |   |    |    |   |   |   |   |   |   |   |
| 0                                                                                                                         | 0 | 0 | 0 | 0  | 0  | 0 | 0 | 0 | 0 | 0 | 0 | 0 |
| 0                                                                                                                         | 0 | 0 | 0 | 0  | 0  | 0 | 0 | 0 | 0 | 0 | 0 | 0 |
| 0                                                                                                                         | 0 | 0 | 0 | 0  | 0  | 0 | 0 | 0 | 0 | 0 | 0 | 0 |
| 0                                                                                                                         | 0 | 0 | 0 | 0  | 0  | 0 | 0 | 3 | 0 | 0 | 0 | 0 |
| 0                                                                                                                         | 0 | 0 | 0 | 0  | 0  | 0 | 0 | 0 | 0 | 0 | 0 | 0 |
| 0                                                                                                                         | 0 | 0 | 0 | 0  | 0  | 0 |   |   |   |   |   |   |
| "Viruses;Phixviricota;Malgrandaviricetes;Petitvirales;Microviridae;Microviridae__na;Tortoise_microvirus_90"               |   |   |   |    |    |   |   |   |   |   |   |   |
| 0                                                                                                                         | 0 | 0 | 0 | 15 | 0  | 0 | 0 | 0 | 0 | 0 | 0 | 0 |
| 0                                                                                                                         | 0 | 0 | 0 | 0  | 0  | 0 | 0 | 0 | 0 | 0 | 0 | 0 |
| 0                                                                                                                         | 0 | 0 | 0 | 0  | 0  | 0 | 0 | 0 | 0 | 0 | 0 | 0 |
| 0                                                                                                                         | 0 | 0 | 0 | 0  | 0  | 0 | 0 | 0 | 0 | 0 | 0 | 0 |
| 0                                                                                                                         | 0 | 0 | 0 | 0  | 0  | 0 | 0 | 0 | 0 | 0 | 0 | 0 |
| 0                                                                                                                         | 0 | 0 | 0 | 0  | 0  | 0 |   |   |   |   |   |   |
| "Viruses;Phixviricota;Malgrandaviricetes;Petitvirales;Microviridae;Microviridae__na;Trichosanthes_kirilowii_gokushovirus" |   |   |   |    |    |   |   |   |   |   |   |   |
| 0                                                                                                                         | 0 | 0 | 0 | 0  | 4  | 0 | 0 | 0 | 0 | 0 | 0 | 0 |
| 0                                                                                                                         | 0 | 0 | 0 | 0  | 0  | 0 | 0 | 0 | 0 | 0 | 0 | 0 |
| 0                                                                                                                         | 0 | 0 | 0 | 0  | 0  | 0 | 0 | 0 | 0 | 3 | 0 | 0 |
| 0                                                                                                                         | 0 | 0 | 0 | 0  | 0  | 0 | 0 | 0 | 0 | 0 | 0 | 0 |
| 0                                                                                                                         | 0 | 0 | 0 | 0  | 0  | 0 | 0 | 0 | 0 | 0 | 0 | 0 |
| 0                                                                                                                         | 0 | 0 | 0 | 0  | 0  | 0 | 0 |   |   |   |   |   |
| "Viruses;Phixviricota;Malgrandaviricetes;Petitvirales;Microviridae;Microviridae__na;uncultured_marine_Microviridae"       |   |   |   |    |    |   |   |   |   |   |   |   |
| 0                                                                                                                         | 0 | 1 | 2 | 8  | 10 | 0 | 0 | 0 | 0 | 0 | 0 | 0 |
| 0                                                                                                                         | 0 | 0 | 1 | 0  | 0  | 0 | 0 | 0 | 2 | 0 | 0 | 0 |
| 0                                                                                                                         | 0 | 0 | 0 | 0  | 0  | 0 | 0 | 0 | 0 | 0 | 0 | 0 |
| 0                                                                                                                         | 0 | 0 | 0 | 0  | 0  | 0 | 0 | 2 | 0 | 0 | 0 | 0 |
| 0                                                                                                                         | 0 | 0 | 0 | 0  | 0  | 0 | 0 | 0 | 0 | 0 | 0 | 0 |
| 0                                                                                                                         | 0 | 0 | 0 | 0  | 0  | 0 |   |   |   |   |   |   |
| "Viruses;Phixviricota;Malgrandaviricetes;Petitvirales;Microviridae;Microviridae__na;uncultured_Microviridae"              |   |   |   |    |    |   |   |   |   |   |   |   |
| 0                                                                                                                         | 0 | 1 | 3 | 29 | 0  | 0 | 0 | 0 | 0 | 0 | 0 | 0 |
| 0                                                                                                                         | 0 | 0 | 0 | 1  | 0  | 0 | 0 | 0 | 0 | 0 | 0 | 0 |
| 0                                                                                                                         | 0 | 0 | 0 | 0  | 0  | 0 | 0 | 0 | 0 | 0 | 0 | 0 |
| 0                                                                                                                         | 0 | 0 | 0 | 0  | 0  | 0 | 0 | 4 | 0 | 0 | 0 | 0 |
| 0                                                                                                                         | 0 | 0 | 0 | 0  | 0  | 0 | 0 | 0 | 0 | 0 | 0 | 0 |
| 0                                                                                                                         | 0 | 0 | 0 | 0  | 0  | 0 |   |   |   |   |   |   |
| "Viruses;Phixviricota;Malgrandaviricetes;Petitvirales;Microviridae;Microviridae__na;Wigfec_virus_K19_141"                 |   |   |   |    |    |   |   |   |   |   |   |   |
| 0                                                                                                                         | 0 | 0 | 0 | 10 | 0  | 0 | 0 | 0 | 0 | 0 | 0 | 0 |
| 0                                                                                                                         | 0 | 0 | 1 | 0  | 0  | 0 | 0 | 0 | 0 | 0 | 0 | 0 |
| 0                                                                                                                         | 0 | 0 | 0 | 0  | 0  | 0 | 0 | 0 | 0 | 0 | 0 | 0 |
| 0                                                                                                                         | 0 | 0 | 0 | 0  | 0  | 0 | 0 | 0 | 0 | 0 | 0 | 0 |
| 0                                                                                                                         | 0 | 0 | 0 | 0  | 0  | 0 | 0 | 0 | 0 | 0 | 0 | 0 |
| 0                                                                                                                         | 0 | 0 | 0 | 0  | 1  | 0 |   |   |   |   |   |   |
| "Viruses;Phixviricota;Malgrandaviricetes;Petitvirales;Microviridae;Microviridae__na;Wigfec_virus_K19_151"                 |   |   |   |    |    |   |   |   |   |   |   |   |
| 0                                                                                                                         | 0 | 1 | 2 | 15 | 12 | 0 | 0 | 0 | 0 | 0 | 0 | 0 |
| 0                                                                                                                         | 0 | 0 | 0 | 0  | 0  | 0 | 0 | 0 | 0 | 1 | 0 | 0 |
| 0                                                                                                                         | 0 | 0 | 0 | 0  | 0  | 0 | 0 | 0 | 0 | 0 | 0 | 0 |
| 0                                                                                                                         | 0 | 0 | 0 | 0  | 0  | 0 | 0 | 8 | 0 | 0 | 0 | 0 |



|                                                                                                           |   |   |   |    |    |   |   |   |   |   |   |   |
|-----------------------------------------------------------------------------------------------------------|---|---|---|----|----|---|---|---|---|---|---|---|
| 0                                                                                                         | 0 | 0 | 0 | 0  | 0  | 0 | 0 | 0 | 0 | 0 | 0 | 0 |
| 0                                                                                                         | 0 | 0 | 0 | 0  | 0  | 0 |   |   |   |   |   |   |
| "Viruses;Phixviricota;Malgrandaviricetes;Petitvirales;Microviridae;Microviridae__na;Wigfec_virus_K19_152" |   |   |   |    |    |   |   |   |   |   |   |   |
| 0                                                                                                         | 0 | 1 | 0 | 17 | 0  | 0 | 0 | 0 | 0 | 0 | 0 | 0 |
| 0                                                                                                         | 0 | 0 | 0 | 0  | 0  | 0 | 0 | 0 | 0 | 0 | 0 | 0 |
| 0                                                                                                         | 0 | 0 | 0 | 0  | 0  | 0 | 0 | 0 | 0 | 0 | 0 | 0 |
| 0                                                                                                         | 0 | 0 | 0 | 0  | 0  | 0 | 0 | 0 | 0 | 0 | 0 | 0 |
| 0                                                                                                         | 0 | 0 | 0 | 0  | 0  | 0 | 0 | 0 | 0 | 0 | 0 | 0 |
| 0                                                                                                         | 0 | 0 | 0 | 0  | 0  | 0 |   |   |   |   |   |   |
| "Viruses;Phixviricota;Malgrandaviricetes;Petitvirales;Microviridae;Microviridae__na;Wigfec_virus_K19_160" |   |   |   |    |    |   |   |   |   |   |   |   |
| 0                                                                                                         | 0 | 0 | 1 | 0  | 0  | 0 | 0 | 0 | 0 | 0 | 0 | 0 |
| 0                                                                                                         | 0 | 0 | 0 | 0  | 0  | 0 | 0 | 0 | 1 | 0 | 0 | 0 |
| 0                                                                                                         | 0 | 0 | 0 | 0  | 0  | 0 | 0 | 0 | 0 | 0 | 0 | 0 |
| 0                                                                                                         | 0 | 0 | 0 | 0  | 0  | 0 | 0 | 0 | 0 | 0 | 0 | 0 |
| 0                                                                                                         | 0 | 0 | 0 | 0  | 0  | 0 | 0 | 0 | 0 | 0 | 0 | 0 |
| 0                                                                                                         | 0 | 0 | 0 | 0  | 0  | 0 |   |   |   |   |   |   |
| "Viruses;Phixviricota;Malgrandaviricetes;Petitvirales;Microviridae;Microviridae__na;Wigfec_virus_K19_161" |   |   |   |    |    |   |   |   |   |   |   |   |
| 0                                                                                                         | 0 | 1 | 1 | 4  | 4  | 0 | 0 | 0 | 0 | 0 | 0 | 0 |
| 0                                                                                                         | 0 | 0 | 0 | 0  | 0  | 0 | 0 | 0 | 0 | 0 | 0 | 0 |
| 0                                                                                                         | 0 | 0 | 0 | 0  | 0  | 0 | 0 | 0 | 0 | 0 | 0 | 0 |
| 0                                                                                                         | 0 | 0 | 0 | 0  | 0  | 0 | 0 | 2 | 0 | 0 | 0 | 0 |
| 0                                                                                                         | 0 | 0 | 0 | 0  | 0  | 0 | 0 | 0 | 0 | 0 | 0 | 0 |
| 0                                                                                                         | 0 | 0 | 0 | 0  | 0  | 0 |   |   |   |   |   |   |
| "Viruses;Phixviricota;Malgrandaviricetes;Petitvirales;Microviridae;Microviridae__na;Wigfec_virus_K19_170" |   |   |   |    |    |   |   |   |   |   |   |   |
| 0                                                                                                         | 0 | 0 | 2 | 11 | 10 | 0 | 0 | 0 | 0 | 0 | 0 | 0 |
| 0                                                                                                         | 0 | 0 | 0 | 0  | 0  | 0 | 0 | 0 | 1 | 0 | 0 | 0 |
| 0                                                                                                         | 0 | 0 | 0 | 0  | 0  | 0 | 0 | 0 | 0 | 0 | 0 | 0 |
| 0                                                                                                         | 0 | 2 | 0 | 0  | 0  | 0 | 0 | 0 | 0 | 0 | 0 | 0 |
| 1                                                                                                         | 0 | 0 | 0 | 0  | 0  | 0 | 0 | 0 | 0 | 0 | 0 | 0 |
| 0                                                                                                         | 0 | 0 | 0 | 0  | 0  | 0 |   |   |   |   |   |   |
| "Viruses;Phixviricota;Malgrandaviricetes;Petitvirales;Microviridae;Microviridae__na;Wigfec_virus_K19_177" |   |   |   |    |    |   |   |   |   |   |   |   |
| 0                                                                                                         | 0 | 1 | 0 | 17 | 2  | 0 | 0 | 0 | 0 | 0 | 0 | 0 |
| 0                                                                                                         | 0 | 0 | 0 | 0  | 0  | 0 | 0 | 0 | 0 | 0 | 0 | 0 |
| 0                                                                                                         | 0 | 0 | 0 | 0  | 0  | 0 | 0 | 0 | 0 | 0 | 0 | 0 |
| 0                                                                                                         | 0 | 0 | 0 | 0  | 0  | 0 | 0 | 5 | 0 | 0 | 0 | 0 |
| 0                                                                                                         | 0 | 0 | 0 | 0  | 0  | 0 | 0 | 0 | 0 | 0 | 0 | 0 |
| 0                                                                                                         | 0 | 0 | 0 | 0  | 1  | 0 |   |   |   |   |   |   |
| "Viruses;Phixviricota;Malgrandaviricetes;Petitvirales;Microviridae;Microviridae__na;Wigfec_virus_K19_179" |   |   |   |    |    |   |   |   |   |   |   |   |
| 0                                                                                                         | 0 | 1 | 1 | 41 | 19 | 0 | 0 | 0 | 0 | 0 | 0 | 0 |
| 0                                                                                                         | 0 | 0 | 0 | 0  | 0  | 0 | 0 | 0 | 1 | 0 | 0 | 0 |
| 0                                                                                                         | 0 | 1 | 0 | 0  | 0  | 0 | 0 | 0 | 0 | 0 | 0 | 0 |
| 0                                                                                                         | 0 | 0 | 0 | 0  | 0  | 0 | 0 | 1 | 0 | 0 | 0 | 0 |
| 0                                                                                                         | 0 | 0 | 0 | 0  | 0  | 0 | 0 | 0 | 0 | 0 | 0 | 0 |
| 0                                                                                                         | 0 | 0 | 0 | 0  | 1  | 0 |   |   |   |   |   |   |
| "Viruses;Phixviricota;Malgrandaviricetes;Petitvirales;Microviridae;Microviridae__na;Wigfec_virus_K19_81"  |   |   |   |    |    |   |   |   |   |   |   |   |
| 0                                                                                                         | 0 | 0 | 1 | 10 | 14 | 0 | 0 | 0 | 0 | 0 | 0 | 0 |
| 0                                                                                                         | 0 | 0 | 0 | 0  | 0  | 0 | 0 | 0 | 0 | 0 | 0 | 0 |
| 0                                                                                                         | 0 | 0 | 0 | 0  | 0  | 0 | 0 | 0 | 0 | 0 | 0 | 0 |
| 0                                                                                                         | 0 | 0 | 0 | 0  | 0  | 0 | 0 | 3 | 0 | 0 | 0 | 0 |

|                                                                                                                      |     |      |     |     |    |     |     |    |    |    |    |      |
|----------------------------------------------------------------------------------------------------------------------|-----|------|-----|-----|----|-----|-----|----|----|----|----|------|
| 0                                                                                                                    | 0   | 0    | 0   | 0   | 0  | 0   | 0   | 0  | 0  | 0  | 0  | 0    |
| 0                                                                                                                    | 0   | 0    | 0   | 0   | 1  | 0   |     |    |    |    |    |      |
| "Viruses;Phixviricota;Malgrandaviricetes;Petitvirales;Microviridae;Microviridae__na;Wigfec_virus_K19_83"             |     |      |     |     |    |     |     |    |    |    |    |      |
| 0                                                                                                                    | 0   | 0    | 3   | 35  | 27 | 0   | 0   | 0  | 0  | 0  | 0  | 0    |
| 0                                                                                                                    | 0   | 0    | 0   | 0   | 0  | 0   | 0   | 0  | 0  | 0  | 0  | 0    |
| 0                                                                                                                    | 0   | 0    | 0   | 0   | 0  | 0   | 0   | 0  | 0  | 0  | 0  | 0    |
| 0                                                                                                                    | 0   | 0    | 0   | 0   | 0  | 0   | 0   | 0  | 0  | 0  | 0  | 0    |
| 0                                                                                                                    | 0   | 0    | 0   | 0   | 0  | 0   | 0   | 0  | 0  | 0  | 0  | 0    |
| 0                                                                                                                    | 0   | 0    | 0   | 0   | 0  | 0   |     |    |    |    |    |      |
| "Viruses;Phixviricota;Malgrandaviricetes;Petitvirales;Microviridae;Microviridae__na;Wigfec_virus_K19_94"             |     |      |     |     |    |     |     |    |    |    |    |      |
| 0                                                                                                                    | 0   | 0    | 0   | 2   | 0  | 0   | 0   | 0  | 0  | 0  | 0  | 0    |
| 0                                                                                                                    | 0   | 0    | 0   | 0   | 0  | 0   | 0   | 0  | 0  | 0  | 0  | 0    |
| 0                                                                                                                    | 0   | 0    | 0   | 0   | 0  | 0   | 0   | 0  | 0  | 0  | 0  | 0    |
| 0                                                                                                                    | 0   | 0    | 0   | 0   | 0  | 0   | 0   | 0  | 0  | 0  | 0  | 0    |
| 0                                                                                                                    | 0   | 0    | 0   | 0   | 0  | 0   | 0   | 0  | 0  | 0  | 0  | 0    |
| 0                                                                                                                    | 0   | 0    | 0   | 0   | 0  | 0   |     |    |    |    |    |      |
| "Viruses;Phixviricota;Malgrandaviricetes;Petitvirales;Microviridae;Microviridae__uc;Microviridae__uc" 0              |     |      |     |     |    |     |     |    |    |    |    |      |
| 0                                                                                                                    | 21  | 58   | 549 | 481 | 0  | 0   | 4   | 0  | 0  | 0  | 5  | 7    |
| 331                                                                                                                  | 408 | 953  | 33  | 1   | 0  | 11  | 8   | 57 | 35 | 6  | 7  | 1968 |
| 577                                                                                                                  | 891 | 2045 | 0   | 0   | 2  | 1   | 976 | 38 | 4  | 2  | 23 | 5    |
| 3                                                                                                                    | 92  | 0    | 1   | 20  | 5  | 0   | 75  | 0  | 1  | 2  | 0  | 50   |
| 9126                                                                                                                 | 12  | 7    | 0   | 0   | 0  | 144 | 1   | 0  | 26 | 38 | 1  | 8    |
| 13                                                                                                                   | 8   | 252  | 118 | 20  | 0  |     |     |    |    |    |    |      |
| "Viruses;Phixviricota;Malgrandaviricetes;Petitvirales;Microviridae;Microvirus;Antarctic_microvirus_COCH21_V_SP_13"   |     |      |     |     |    |     |     |    |    |    |    |      |
| 0                                                                                                                    | 0   | 0    | 0   | 2   | 0  | 0   | 0   | 0  | 0  | 0  | 0  | 0    |
| 0                                                                                                                    | 0   | 0    | 0   | 0   | 0  | 0   | 0   | 0  | 0  | 0  | 0  | 0    |
| 0                                                                                                                    | 0   | 0    | 0   | 0   | 0  | 0   | 0   | 0  | 0  | 0  | 0  | 0    |
| 0                                                                                                                    | 0   | 0    | 0   | 0   | 0  | 0   | 0   | 0  | 1  | 0  | 0  | 0    |
| 0                                                                                                                    | 0   | 0    | 0   | 0   | 0  | 0   | 0   | 0  | 0  | 0  | 0  | 0    |
| 0                                                                                                                    | 0   | 0    | 0   | 0   | 0  | 0   | 0   |    |    |    |    |      |
| "Viruses;Phixviricota;Malgrandaviricetes;Petitvirales;Microviridae;Microvirus;Antarctic_microvirus_TYR_006_V_SP_13"0 |     |      |     |     |    |     |     |    |    |    |    |      |
| 0                                                                                                                    | 0   | 0    | 0   | 0   | 1  | 0   | 0   | 0  | 0  | 0  | 0  | 0    |
| 0                                                                                                                    | 0   | 0    | 0   | 0   | 0  | 0   | 0   | 0  | 0  | 0  | 0  | 0    |
| 0                                                                                                                    | 0   | 0    | 0   | 0   | 0  | 0   | 0   | 0  | 0  | 0  | 0  | 0    |
| 0                                                                                                                    | 0   | 0    | 0   | 0   | 0  | 0   | 0   | 0  | 0  | 0  | 0  | 0    |
| 0                                                                                                                    | 0   | 0    | 0   | 0   | 0  | 0   | 0   | 0  | 0  | 0  | 0  | 0    |
| 0                                                                                                                    | 0   | 0    | 0   | 0   | 0  | 0   |     |    |    |    |    |      |
| "Viruses;Phixviricota;Malgrandaviricetes;Petitvirales;Microviridae;Microvirus;Army_ant_associated_microvirus_6"      |     |      |     |     |    |     |     |    |    |    |    |      |
| 0                                                                                                                    | 0   | 0    | 1   | 2   | 0  | 0   | 0   | 0  | 0  | 0  | 0  | 0    |
| 0                                                                                                                    | 0   | 0    | 0   | 0   | 0  | 0   | 0   | 0  | 0  | 0  | 0  | 0    |
| 0                                                                                                                    | 0   | 0    | 0   | 0   | 0  | 0   | 0   | 0  | 0  | 0  | 0  | 0    |
| 0                                                                                                                    | 0   | 0    | 0   | 0   | 0  | 0   | 0   | 0  | 0  | 0  | 0  | 0    |
| 0                                                                                                                    | 0   | 0    | 0   | 0   | 0  | 0   | 0   | 0  | 0  | 0  | 0  | 0    |
| 0                                                                                                                    | 0   | 0    | 0   | 0   | 0  | 0   |     |    |    |    |    |      |
| "Viruses;Phixviricota;Malgrandaviricetes;Petitvirales;Microviridae;Microvirus;Blackfly_microvirus_SF02"0             |     |      |     |     |    |     |     |    |    |    |    |      |
| 0                                                                                                                    | 3   | 15   | 147 | 35  | 0  | 0   | 0   | 0  | 0  | 0  | 0  | 0    |
| 0                                                                                                                    | 0   | 2    | 0   | 0   | 0  | 0   | 0   | 0  | 1  | 0  | 0  | 0    |
| 0                                                                                                                    | 0   | 0    | 0   | 0   | 0  | 0   | 0   | 3  | 0  | 0  | 0  | 0    |
| 0                                                                                                                    | 0   | 0    | 0   | 1   | 1  | 0   | 32  | 0  | 0  | 0  | 0  | 1    |

[illegible]

[illegible]

[illegible]

[illegible]

[illegible]

[illegible]



[illegible]

[illegible]

[illegible]

[illegible]

[illegible]

|                                                                                                            |   |   |   |   |   |   |   |     |    |   |   |   |
|------------------------------------------------------------------------------------------------------------|---|---|---|---|---|---|---|-----|----|---|---|---|
|                                                                                                            | 0 | 0 | 0 | 0 | 0 | 0 | 0 | 0   | 0  | 0 | 0 | 0 |
|                                                                                                            | 0 | 0 | 0 | 0 | 0 | 0 | 0 |     |    |   |   |   |
| "Viruses;Uroviricota;Caudoviricetes;Caudoviricetes__na;Autographiviridae;Pijolavirus;Pijolavirus__uc"      | 0 |   |   |   |   |   |   |     |    |   |   | 0 |
|                                                                                                            | 0 | 0 | 0 | 0 | 4 | 0 | 0 | 0   | 0  | 0 | 0 | 0 |
|                                                                                                            | 0 | 0 | 0 | 0 | 0 | 0 | 0 | 0   | 0  | 0 | 0 | 0 |
|                                                                                                            | 0 | 0 | 0 | 0 | 0 | 0 | 0 | 0   | 0  | 0 | 0 | 0 |
|                                                                                                            | 0 | 0 | 0 | 0 | 0 | 0 | 0 | 0   | 0  | 0 | 0 | 0 |
|                                                                                                            | 0 | 0 | 0 | 0 | 0 | 0 | 0 | 0   | 0  | 0 | 0 | 0 |
|                                                                                                            | 0 | 0 | 0 | 0 | 0 | 0 | 0 | 0   | 0  | 0 | 0 | 0 |
|                                                                                                            | 0 | 0 | 0 | 0 | 0 | 0 |   |     |    |   |   |   |
| "Viruses;Uroviricota;Caudoviricetes;Caudoviricetes__na;Autographiviridae;Pradovirus;Bacteriophage_Titan-X" | 0 | 0 | 0 | 1 | 0 | 0 | 0 | 0   | 0  | 0 | 0 | 0 |
|                                                                                                            | 0 | 0 | 0 | 0 | 0 | 0 | 0 | 0   | 0  | 0 | 0 | 0 |
|                                                                                                            | 0 | 0 | 0 | 0 | 0 | 0 | 0 | 0   | 0  | 0 | 0 | 0 |
|                                                                                                            | 0 | 0 | 0 | 0 | 0 | 0 | 0 | 0   | 0  | 0 | 0 | 0 |
|                                                                                                            | 0 | 0 | 0 | 0 | 0 | 0 | 0 | 0   | 0  | 0 | 0 | 0 |
|                                                                                                            | 0 | 0 | 0 | 0 | 0 | 0 | 0 |     |    |   |   |   |
| "Viruses;Uroviricota;Caudoviricetes;Caudoviricetes__na;Autographiviridae;Przondovirus;Przondovirus__uc"    | 0 | 0 | 0 | 0 | 0 | 0 | 0 | 0   | 0  | 0 | 0 | 0 |
|                                                                                                            | 0 | 0 | 0 | 0 | 0 | 0 | 0 | 0   | 0  | 0 | 0 | 0 |
|                                                                                                            | 0 | 0 | 0 | 0 | 0 | 0 | 0 | 0   | 0  | 0 | 0 | 0 |
|                                                                                                            | 0 | 0 | 2 | 0 | 0 | 0 | 0 | 0   | 0  | 0 | 0 | 0 |
|                                                                                                            | 0 | 0 | 0 | 0 | 0 | 0 | 0 | 0   | 0  | 0 | 0 | 0 |
|                                                                                                            | 0 | 0 | 0 | 0 | 0 | 0 | 0 |     |    |   |   |   |
| "Viruses;Uroviricota;Caudoviricetes;Caudoviricetes__na;Autographiviridae;Qadamvirus;Qadamvirus_SB28"       | 0 | 0 | 0 | 0 | 8 | 0 | 0 | 0   | 0  | 0 | 0 | 0 |
|                                                                                                            | 0 | 0 | 0 | 0 | 0 | 0 | 0 | 0   | 0  | 0 | 0 | 0 |
|                                                                                                            | 0 | 0 | 0 | 0 | 0 | 0 | 0 | 0   | 0  | 0 | 0 | 0 |
|                                                                                                            | 0 | 0 | 3 | 0 | 0 | 0 | 0 | 0   | 0  | 0 | 0 | 0 |
|                                                                                                            | 0 | 0 | 0 | 0 | 0 | 0 | 0 | 0   | 0  | 0 | 0 | 0 |
|                                                                                                            | 0 | 0 | 0 | 0 | 0 | 0 | 0 |     |    |   |   |   |
| "Viruses;Uroviricota;Caudoviricetes;Caudoviricetes__na;Autographiviridae;Stompelvirus;Stompelvirus_RPSC1"  | 0 | 0 | 0 | 1 | 0 | 0 | 0 | 0   | 0  | 0 | 0 | 0 |
|                                                                                                            | 0 | 0 | 0 | 0 | 0 | 0 | 0 | 0   | 0  | 0 | 0 | 0 |
|                                                                                                            | 0 | 0 | 0 | 0 | 0 | 0 | 0 | 0   | 0  | 0 | 0 | 0 |
|                                                                                                            | 0 | 0 | 0 | 0 | 0 | 0 | 0 | 0   | 0  | 0 | 0 | 0 |
|                                                                                                            | 0 | 0 | 0 | 0 | 0 | 0 | 0 | 0   | 0  | 0 | 0 | 0 |
|                                                                                                            | 0 | 0 | 0 | 0 | 0 | 0 | 0 |     |    |   |   |   |
| "Viruses;Uroviricota;Caudoviricetes;Caudoviricetes__na;Autographiviridae;Stubburvirus;Stubburvirus_LKA1"   | 0 | 0 | 0 | 7 | 0 | 0 | 0 | 0   | 21 | 0 | 0 | 0 |
|                                                                                                            | 0 | 0 | 0 | 0 | 0 | 0 | 0 | 0   | 0  | 0 | 0 | 0 |
|                                                                                                            | 0 | 0 | 0 | 0 | 0 | 0 | 0 | 0   | 0  | 0 | 0 | 0 |
|                                                                                                            | 0 | 0 | 0 | 0 | 0 | 4 | 0 | 117 | 0  | 0 | 0 | 0 |
|                                                                                                            | 0 | 0 | 0 | 0 | 1 | 0 | 0 | 0   | 0  | 0 | 0 | 0 |
|                                                                                                            | 0 | 0 | 0 | 0 | 0 | 0 | 0 |     |    |   |   |   |
| "Viruses;Uroviricota;Caudoviricetes;Caudoviricetes__na;Autographiviridae;Tangaroavirus;Tangaroavirus_tv951 | 0 | 0 | 0 | 0 | 2 | 0 | 0 | 0   | 0  | 0 | 0 | 0 |
| 510a"                                                                                                      | 0 | 0 | 0 | 0 | 0 | 0 | 0 | 0   | 0  | 0 | 0 | 0 |
|                                                                                                            | 0 | 0 | 0 | 0 | 0 | 0 | 0 | 0   | 0  | 0 | 0 | 0 |
|                                                                                                            | 0 | 0 | 0 | 0 | 0 | 0 | 0 | 0   | 0  | 0 | 0 | 0 |
|                                                                                                            | 0 | 0 | 0 | 0 | 0 | 0 | 0 | 1   | 0  | 0 | 0 | 0 |

[illegible]

[illegible]



[illegible]

[illegible]

[illegible]

|                                                                                                                     |   |   |   |   |   |   |   |   |    |    |   |   |
|---------------------------------------------------------------------------------------------------------------------|---|---|---|---|---|---|---|---|----|----|---|---|
|                                                                                                                     | 0 | 0 | 0 | 0 | 0 | 0 | 0 | 5 | 1  | 0  | 0 | 0 |
|                                                                                                                     | 0 | 0 | 0 | 0 | 0 | 0 | 0 |   |    |    |   |   |
| "Viruses;Uroviricota;Caudoviricetes;Caudoviricetes__na;Caudoviricetes__na;Bingvirus;Bingvirus__uc"                  | 0 |   |   |   |   |   |   |   |    |    |   |   |
|                                                                                                                     | 0 | 0 | 0 | 0 | 0 | 0 | 0 | 0 | 0  | 0  | 0 | 0 |
|                                                                                                                     | 0 | 0 | 0 | 0 | 0 | 0 | 0 | 0 | 0  | 0  | 0 | 0 |
|                                                                                                                     | 0 | 0 | 0 | 0 | 0 | 0 | 0 | 0 | 0  | 0  | 0 | 0 |
|                                                                                                                     | 0 | 0 | 0 | 0 | 0 | 0 | 1 | 0 | 0  | 0  | 0 | 0 |
|                                                                                                                     | 0 | 0 | 0 | 0 | 0 | 0 | 0 | 0 | 0  | 0  | 0 | 0 |
|                                                                                                                     | 0 | 0 | 0 | 0 | 0 | 0 |   |   |    |    |   |   |
| "Viruses;Uroviricota;Caudoviricetes;Caudoviricetes__na;Caudoviricetes__na;Bingvirus;Streptomyces_phage_ClubPenguin" | 0 | 0 | 0 | 0 | 5 | 0 | 0 | 0 | 0  | 0  | 0 | 0 |
|                                                                                                                     | 0 | 0 | 0 | 1 | 0 | 1 | 0 | 0 | 0  | 0  | 0 | 0 |
|                                                                                                                     | 0 | 0 | 0 | 0 | 0 | 0 | 0 | 0 | 0  | 0  | 0 | 0 |
|                                                                                                                     | 0 | 0 | 0 | 0 | 0 | 0 | 0 | 0 | 9  | 0  | 0 | 0 |
|                                                                                                                     | 0 | 0 | 0 | 0 | 0 | 0 | 0 | 0 | 0  | 0  | 0 | 0 |
|                                                                                                                     | 0 | 0 | 0 | 0 | 0 | 0 | 0 |   |    |    |   |   |
| "Viruses;Uroviricota;Caudoviricetes;Caudoviricetes__na;Caudoviricetes__na;Bingvirus;Streptomyces_phage_Kardashian"  | 0 | 0 | 0 | 0 | 6 | 1 | 0 | 0 | 0  | 0  | 0 | 0 |
|                                                                                                                     | 0 | 0 | 0 | 0 | 0 | 0 | 0 | 0 | 0  | 0  | 0 | 0 |
|                                                                                                                     | 0 | 0 | 0 | 0 | 0 | 0 | 0 | 0 | 0  | 0  | 0 | 0 |
|                                                                                                                     | 0 | 0 | 0 | 0 | 0 | 0 | 0 | 0 | 0  | 0  | 0 | 0 |
|                                                                                                                     | 0 | 0 | 0 | 0 | 0 | 0 | 0 | 0 | 0  | 0  | 0 | 0 |
|                                                                                                                     | 0 | 0 | 0 | 0 | 0 | 0 | 0 |   |    |    |   |   |
| "Viruses;Uroviricota;Caudoviricetes;Caudoviricetes__na;Caudoviricetes__na;Bingvirus;Streptomyces_phage_SscP1EGY"    | 0 | 0 | 0 | 0 | 0 | 0 | 0 | 0 | 0  | 0  | 0 | 0 |
|                                                                                                                     | 0 | 0 | 0 | 0 | 0 | 0 | 0 | 0 | 0  | 0  | 0 | 0 |
|                                                                                                                     | 0 | 0 | 0 | 0 | 0 | 0 | 0 | 0 | 0  | 0  | 0 | 0 |
|                                                                                                                     | 0 | 0 | 0 | 0 | 0 | 0 | 0 | 0 | 0  | 0  | 0 | 0 |
|                                                                                                                     | 0 | 0 | 0 | 0 | 0 | 0 | 0 | 0 | 0  | 0  | 0 | 0 |
|                                                                                                                     | 0 | 0 | 0 | 0 | 1 | 0 |   |   |    |    |   |   |
| "Viruses;Uroviricota;Caudoviricetes;Caudoviricetes__na;Caudoviricetes__na;Bjornvirus;Bjornvirus_bjorn"              | 0 | 0 | 0 | 0 | 1 | 0 | 0 | 0 | 0  | 0  | 0 | 0 |
|                                                                                                                     | 0 | 0 | 0 | 0 | 0 | 0 | 0 | 0 | 0  | 0  | 0 | 0 |
|                                                                                                                     | 0 | 0 | 0 | 0 | 0 | 0 | 0 | 0 | 0  | 0  | 0 | 0 |
|                                                                                                                     | 0 | 0 | 0 | 0 | 0 | 2 | 0 | 0 | 0  | 0  | 0 | 0 |
|                                                                                                                     | 0 | 0 | 0 | 0 | 0 | 0 | 0 | 0 | 0  | 0  | 0 | 0 |
|                                                                                                                     | 0 | 0 | 0 | 0 | 0 | 0 |   |   |    |    |   |   |
| "Viruses;Uroviricota;Caudoviricetes;Caudoviricetes__na;Caudoviricetes__na;Borockvirus;Borockvirus_brock"            | 0 | 0 | 0 | 1 | 0 | 1 | 0 | 0 | 0  | 0  | 0 | 0 |
|                                                                                                                     | 2 | 0 | 0 | 0 | 0 | 0 | 0 | 0 | 0  | 0  | 0 | 0 |
|                                                                                                                     | 0 | 0 | 0 | 0 | 0 | 0 | 0 | 0 | 0  | 0  | 0 | 0 |
|                                                                                                                     | 0 | 0 | 0 | 0 | 0 | 0 | 0 | 0 | 0  | 0  | 0 | 0 |
|                                                                                                                     | 0 | 0 | 0 | 0 | 0 | 0 | 0 | 0 | 0  | 0  | 0 | 0 |
|                                                                                                                     | 0 | 0 | 0 | 0 | 0 | 0 |   |   |    |    |   |   |
| "Viruses;Uroviricota;Caudoviricetes;Caudoviricetes__na;Caudoviricetes__na;Brigitvirus;Brigitvirus_brigit"           | 0 | 0 | 0 | 0 | 0 | 0 | 0 | 0 | 0  | 0  | 0 | 0 |
|                                                                                                                     | 0 | 0 | 0 | 0 | 0 | 0 | 0 | 0 | 0  | 0  | 0 | 0 |
|                                                                                                                     | 0 | 0 | 0 | 0 | 0 | 1 | 0 | 0 | 0  | 0  | 0 | 0 |
|                                                                                                                     | 0 | 0 | 0 | 0 | 0 | 0 | 0 | 0 | 14 | 15 | 0 | 0 |

[illegible]

[illegible]

[illegible]

[illegible]



[illegible]

|                                                                                                                                 |   |   |   |   |   |   |   |   |   |   |   |   |
|---------------------------------------------------------------------------------------------------------------------------------|---|---|---|---|---|---|---|---|---|---|---|---|
| 0                                                                                                                               | 0 | 0 | 0 | 0 | 0 | 0 | 0 | 0 | 0 | 0 | 0 | 0 |
| 0                                                                                                                               | 0 | 0 | 0 | 0 | 0 | 0 | 0 |   |   |   |   |   |
| "Viruses;Uroviricota;Caudoviricetes;Caudoviricetes__na;Caudoviricetes__na;Caudoviricetes__na;Bacillus_phage_vB_BhaS-171"        | 0 | 0 | 0 | 0 | 0 | 0 | 0 | 0 | 0 | 0 | 0 | 0 |
| 0                                                                                                                               | 0 | 0 | 0 | 1 | 0 | 0 | 0 | 0 | 0 | 0 | 0 | 0 |
| 0                                                                                                                               | 0 | 0 | 0 | 0 | 0 | 0 | 0 | 0 | 0 | 0 | 0 | 0 |
| 0                                                                                                                               | 0 | 0 | 0 | 0 | 0 | 0 | 0 | 0 | 0 | 0 | 0 | 0 |
| 0                                                                                                                               | 0 | 0 | 0 | 0 | 0 | 0 | 0 | 0 | 0 | 0 | 0 | 0 |
| 0                                                                                                                               | 0 | 0 | 0 | 0 | 0 | 0 | 0 |   |   |   |   |   |
| "Viruses;Uroviricota;Caudoviricetes;Caudoviricetes__na;Caudoviricetes__na;Caudoviricetes__na;Bacillus_phage_vB_BspM_AgentSmith" |   | 0 | 0 | 0 | 0 | 0 | 1 | 0 | 0 | 0 | 0 | 0 |
| 0                                                                                                                               | 0 | 0 | 0 | 0 | 0 | 0 | 0 | 0 | 0 | 0 | 0 | 0 |
| 0                                                                                                                               | 0 | 0 | 0 | 0 | 0 | 0 | 0 | 0 | 0 | 0 | 0 | 0 |
| 0                                                                                                                               | 0 | 0 | 0 | 0 | 0 | 0 | 0 | 0 | 0 | 0 | 0 | 0 |
| 0                                                                                                                               | 0 | 0 | 0 | 0 | 0 | 0 | 0 | 0 | 0 | 0 | 0 | 0 |
| 0                                                                                                                               | 0 | 0 | 0 | 0 | 0 | 0 | 0 | 0 | 0 |   |   |   |
| "Viruses;Uroviricota;Caudoviricetes;Caudoviricetes__na;Caudoviricetes__na;Caudoviricetes__na;Bacteroides_p hage_B124-14"        | 0 | 0 | 0 | 0 | 0 | 0 | 0 | 0 | 0 | 0 | 0 | 0 |
| 0                                                                                                                               | 0 | 0 | 0 | 0 | 0 | 0 | 0 | 0 | 0 | 0 | 0 | 0 |
| 0                                                                                                                               | 0 | 0 | 0 | 0 | 0 | 0 | 0 | 0 | 0 | 0 | 1 | 0 |
| 0                                                                                                                               | 0 | 0 | 0 | 0 | 0 | 0 | 0 | 0 | 0 | 0 | 0 | 0 |
| 0                                                                                                                               | 0 | 0 | 0 | 0 | 0 | 0 | 0 | 0 | 0 | 0 | 0 | 0 |
| 0                                                                                                                               | 0 | 0 | 0 | 0 | 0 | 0 | 0 |   |   |   |   |   |
| "Viruses;Uroviricota;Caudoviricetes;Caudoviricetes__na;Caudoviricetes__na;Caudoviricetes__na;Bacteroides_p hage_BF10P2"         | 0 | 0 | 0 | 0 | 2 | 0 | 0 | 0 | 0 | 0 | 0 | 0 |
| 0                                                                                                                               | 0 | 0 | 0 | 0 | 0 | 0 | 0 | 0 | 0 | 0 | 0 | 0 |
| 0                                                                                                                               | 0 | 0 | 0 | 0 | 0 | 0 | 0 | 0 | 0 | 0 | 0 | 0 |
| 0                                                                                                                               | 0 | 0 | 0 | 0 | 0 | 0 | 0 | 0 | 0 | 0 | 0 | 0 |
| 0                                                                                                                               | 0 | 0 | 0 | 0 | 0 | 0 | 0 | 0 | 0 | 0 | 0 | 0 |
| 0                                                                                                                               | 0 | 0 | 0 | 0 | 0 | 0 | 0 |   |   |   |   |   |
| "Viruses;Uroviricota;Caudoviricetes;Caudoviricetes__na;Caudoviricetes__na;Caudoviricetes__na;Bacteroides_p hage_BF766P1"        | 0 | 0 | 0 | 0 | 6 | 5 | 0 | 0 | 0 | 0 | 0 | 0 |
| 0                                                                                                                               | 0 | 0 | 0 | 0 | 0 | 0 | 0 | 0 | 0 | 0 | 0 | 0 |
| 0                                                                                                                               | 0 | 0 | 0 | 0 | 0 | 0 | 0 | 0 | 0 | 0 | 0 | 0 |
| 0                                                                                                                               | 0 | 0 | 0 | 0 | 0 | 0 | 0 | 0 | 0 | 0 | 0 | 0 |
| 0                                                                                                                               | 0 | 0 | 0 | 0 | 0 | 0 | 0 | 0 | 0 | 0 | 0 | 0 |
| 0                                                                                                                               | 0 | 0 | 0 | 0 | 0 | 0 | 0 |   |   |   |   |   |
| "Viruses;Uroviricota;Caudoviricetes;Caudoviricetes__na;Caudoviricetes__na;Caudoviricetes__na;Bacteroides_p hage_BT638P6"        | 0 | 0 | 0 | 0 | 0 | 0 | 0 | 0 | 0 | 0 | 0 | 0 |
| 0                                                                                                                               | 0 | 0 | 0 | 0 | 0 | 1 | 0 | 0 | 0 | 0 | 0 | 0 |
| 0                                                                                                                               | 0 | 0 | 0 | 0 | 0 | 0 | 0 | 0 | 0 | 0 | 0 | 0 |
| 0                                                                                                                               | 0 | 0 | 0 | 0 | 0 | 0 | 0 | 0 | 0 | 0 | 0 | 0 |
| 0                                                                                                                               | 0 | 0 | 0 | 0 | 0 | 0 | 0 | 0 | 0 | 0 | 0 | 0 |
| 0                                                                                                                               | 0 | 0 | 0 | 0 | 0 | 0 | 0 |   |   |   |   |   |
| "Viruses;Uroviricota;Caudoviricetes;Caudoviricetes__na;Caudoviricetes__na;Caudoviricetes__na;Bacteroides_p hage_DAC23"          | 0 | 0 | 0 | 0 | 0 | 0 | 0 | 0 | 0 | 0 | 0 | 0 |
| 0                                                                                                                               | 0 | 0 | 0 | 0 | 0 | 0 | 0 | 2 | 2 | 0 | 0 | 0 |
| 0                                                                                                                               | 0 | 0 | 0 | 0 | 0 | 0 | 0 | 0 | 0 | 0 | 0 | 0 |
| 0                                                                                                                               | 0 | 1 | 0 | 0 | 0 | 6 | 0 | 0 | 0 | 0 | 0 | 0 |

[illegible]

[illegible]











[illegible]

[illegible]

[illegible]

|                                                                                                             |   |   |   |   |   |    |   |   |    |    |    |   |
|-------------------------------------------------------------------------------------------------------------|---|---|---|---|---|----|---|---|----|----|----|---|
| 0                                                                                                           | 0 | 0 | 0 | 0 | 0 | 0  | 0 | 0 | 0  | 0  | 0  | 0 |
| 0                                                                                                           | 0 | 0 | 0 | 0 | 0 | 0  | 0 | 0 |    |    |    |   |
| "Viruses;Uroviricota;Caudoviricetes;Caudoviricetes__na;Caudoviricetes__na;Caudoviricetes__na;Enterobacteria |   |   |   |   |   |    |   |   |    |    |    |   |
| _phage_mEp021"                                                                                              | 0 | 0 | 0 | 0 | 0 | 0  | 3 | 0 | 0  | 0  | 0  | 0 |
| 0                                                                                                           | 0 | 0 | 0 | 0 | 0 | 0  | 0 | 0 | 0  | 0  | 0  | 0 |
| 0                                                                                                           | 0 | 0 | 0 | 0 | 0 | 0  | 0 | 0 | 0  | 0  | 0  | 0 |
| 0                                                                                                           | 0 | 0 | 0 | 0 | 0 | 0  | 0 | 0 | 0  | 0  | 0  | 0 |
| 0                                                                                                           | 0 | 0 | 0 | 0 | 0 | 0  | 0 | 0 | 0  | 0  | 0  | 0 |
| 0                                                                                                           | 0 | 0 | 0 | 0 | 0 | 0  | 0 | 0 | 0  | 0  | 0  | 0 |
| 0                                                                                                           | 0 | 0 | 0 | 0 | 0 | 0  | 0 | 0 |    |    |    |   |
| "Viruses;Uroviricota;Caudoviricetes;Caudoviricetes__na;Caudoviricetes__na;Caudoviricetes__na;Enterocloster_ |   |   |   |   |   |    |   |   |    |    |    |   |
| phage_PMBT10"                                                                                               | 0 | 0 | 0 | 0 | 0 | 0  | 2 | 0 | 0  | 0  | 0  | 0 |
| 0                                                                                                           | 0 | 0 | 0 | 0 | 0 | 0  | 0 | 0 | 0  | 0  | 0  | 1 |
| 0                                                                                                           | 0 | 0 | 0 | 0 | 0 | 0  | 0 | 0 | 0  | 0  | 0  | 0 |
| 0                                                                                                           | 0 | 0 | 0 | 0 | 0 | 0  | 0 | 0 | 0  | 0  | 0  | 0 |
| 0                                                                                                           | 0 | 0 | 0 | 0 | 0 | 0  | 0 | 0 | 0  | 0  | 0  | 0 |
| 0                                                                                                           | 0 | 0 | 0 | 0 | 0 | 0  | 0 | 0 |    |    |    |   |
| "Viruses;Uroviricota;Caudoviricetes;Caudoviricetes__na;Caudoviricetes__na;Caudoviricetes__na;Erythrobacter_ |   |   |   |   |   |    |   |   |    |    |    |   |
| phage_vB_EliS-L02"                                                                                          | 0 | 0 | 1 | 0 | 5 | 0  | 0 | 0 | 0  | 0  | 0  | 0 |
| 0                                                                                                           | 0 | 0 | 0 | 0 | 0 | 0  | 0 | 0 | 0  | 0  | 0  | 0 |
| 0                                                                                                           | 0 | 0 | 0 | 0 | 0 | 0  | 0 | 0 | 0  | 0  | 0  | 0 |
| 0                                                                                                           | 0 | 0 | 0 | 0 | 0 | 0  | 0 | 0 | 0  | 0  | 0  | 0 |
| 1                                                                                                           | 0 | 0 | 0 | 0 | 0 | 0  | 0 | 0 | 0  | 0  | 0  | 0 |
| 0                                                                                                           | 0 | 0 | 0 | 0 | 0 | 0  | 0 | 0 |    |    |    |   |
| "Viruses;Uroviricota;Caudoviricetes;Caudoviricetes__na;Caudoviricetes__na;Caudoviricetes__na;Escherichia_p  |   |   |   |   |   |    |   |   |    |    |    |   |
| hage_BUCT618"                                                                                               | 0 | 0 | 0 | 0 | 0 | 0  | 0 | 0 | 0  | 0  | 0  | 0 |
| 0                                                                                                           | 0 | 0 | 0 | 0 | 0 | 0  | 0 | 0 | 0  | 0  | 0  | 0 |
| 0                                                                                                           | 0 | 0 | 0 | 0 | 0 | 0  | 0 | 0 | 0  | 0  | 0  | 0 |
| 0                                                                                                           | 0 | 0 | 0 | 0 | 0 | 0  | 0 | 0 | 1  | 0  | 0  | 0 |
| 0                                                                                                           | 0 | 0 | 0 | 0 | 0 | 0  | 0 | 0 | 0  | 0  | 0  | 0 |
| 0                                                                                                           | 0 | 0 | 0 | 0 | 0 | 0  | 0 |   |    |    |    |   |
| "Viruses;Uroviricota;Caudoviricetes;Caudoviricetes__na;Caudoviricetes__na;Caudoviricetes__na;Escherichia_p  |   |   |   |   |   |    |   |   |    |    |    |   |
| hage_YDC107_2"                                                                                              | 0 | 0 | 0 | 0 | 0 | 0  | 0 | 0 | 0  | 0  | 0  | 0 |
| 0                                                                                                           | 0 | 0 | 0 | 0 | 0 | 0  | 0 | 0 | 0  | 0  | 0  | 0 |
| 0                                                                                                           | 0 | 0 | 0 | 0 | 0 | 0  | 0 | 0 | 0  | 0  | 0  | 0 |
| 0                                                                                                           | 0 | 0 | 0 | 0 | 0 | 0  | 0 | 0 | 0  | 0  | 0  | 0 |
| 0                                                                                                           | 0 | 0 | 0 | 0 | 0 | 0  | 0 | 0 | 0  | 72 | 11 | 0 |
| 1                                                                                                           | 0 | 0 | 0 | 0 | 0 | 0  | 0 | 0 |    |    |    |   |
| "Viruses;Uroviricota;Caudoviricetes;Caudoviricetes__na;Caudoviricetes__na;Caudoviricetes__na;Exiguobacteri  |   |   |   |   |   |    |   |   |    |    |    |   |
| um_phage_vB_EauM-23"                                                                                        | 0 | 0 | 0 | 0 | 0 | 0  | 0 | 0 | 0  | 0  | 0  | 0 |
| 0                                                                                                           | 0 | 0 | 0 | 0 | 0 | 0  | 0 | 0 | 0  | 0  | 0  | 0 |
| 0                                                                                                           | 0 | 0 | 0 | 0 | 0 | 0  | 0 | 0 | 0  | 0  | 0  | 0 |
| 0                                                                                                           | 0 | 0 | 0 | 0 | 0 | 0  | 0 | 0 | 0  | 0  | 1  | 0 |
| 0                                                                                                           | 0 | 0 | 0 | 0 | 0 | 0  | 0 | 0 | 0  | 0  | 0  | 0 |
| 0                                                                                                           | 0 | 0 | 0 | 0 | 0 | 0  | 0 | 0 |    |    |    |   |
| "Viruses;Uroviricota;Caudoviricetes;Caudoviricetes__na;Caudoviricetes__na;Caudoviricetes__na;Flavobacteriu  |   |   |   |   |   |    |   |   |    |    |    |   |
| m_phage_11b"                                                                                                | 0 | 2 | 0 | 2 | 1 | 10 | 0 | 0 | 0  | 0  | 0  | 0 |
| 0                                                                                                           | 0 | 0 | 0 | 0 | 0 | 0  | 0 | 0 | 0  | 0  | 0  | 0 |
| 0                                                                                                           | 0 | 0 | 0 | 0 | 0 | 0  | 0 | 0 | 0  | 1  | 0  | 0 |
| 0                                                                                                           | 0 | 0 | 0 | 0 | 0 | 0  | 0 | 0 | 13 | 0  | 0  | 0 |

[illegible]

[illegible]



[illegible]



[illegible]



[illegible]

[illegible]

|                                                                                                           |    |    |    |    |    |     |    |    |   |    |   |    |    |
|-----------------------------------------------------------------------------------------------------------|----|----|----|----|----|-----|----|----|---|----|---|----|----|
|                                                                                                           | 0  | 0  | 0  | 1  | 0  | 0   | 0  | 0  | 0 | 2  | 1 | 0  | 0  |
|                                                                                                           | 0  | 0  | 0  | 1  | 0  | 0   | 0  | 0  |   |    |   |    |    |
| "Viruses;Uroviricota;Caudoviricetes;Caudoviricetes__na;Caudoviricetes__na;Caudoviricetes__na;Myoviridae_s |    |    |    |    |    |     |    |    |   |    |   |    |    |
| p._ct3Oc10"                                                                                               | 0  | 0  | 0  | 0  | 0  | 0   | 0  | 0  | 0 | 0  | 0 | 0  | 0  |
|                                                                                                           | 0  | 0  | 0  | 0  | 0  | 0   | 1  | 1  | 0 | 0  | 0 | 0  | 0  |
|                                                                                                           | 0  | 0  | 0  | 0  | 0  | 0   | 1  | 0  | 0 | 58 | 0 | 0  | 0  |
|                                                                                                           | 0  | 0  | 0  | 0  | 0  | 0   | 0  | 0  | 0 | 0  | 0 | 0  | 0  |
|                                                                                                           | 0  | 0  | 0  | 0  | 0  | 0   | 0  | 0  | 0 | 0  | 0 | 0  | 0  |
|                                                                                                           | 0  | 0  | 0  | 0  | 0  | 0   | 0  | 0  |   |    |   |    |    |
| "Viruses;Uroviricota;Caudoviricetes;Caudoviricetes__na;Caudoviricetes__na;Caudoviricetes__na;Myoviridae_s |    |    |    |    |    |     |    |    |   |    |   |    |    |
| p._ct3Sw5"                                                                                                | 0  | 0  | 0  | 0  | 0  | 0   | 0  | 0  | 0 | 0  | 0 | 0  | 0  |
|                                                                                                           | 1  | 2  | 3  | 0  | 3  | 2   | 2  | 4  | 0 | 0  | 0 | 1  | 5  |
|                                                                                                           | 5  | 3  | 1  | 2  | 0  | 0   | 0  | 0  | 0 | 0  | 0 | 1  | 0  |
|                                                                                                           | 0  | 0  | 0  | 0  | 3  | 7   | 3  | 0  | 0 | 0  | 0 | 0  | 0  |
|                                                                                                           | 0  | 0  | 41 | 0  | 0  | 0   | 0  | 0  | 0 | 24 | 8 | 0  | 0  |
|                                                                                                           | 0  | 0  | 1  | 1  | 0  | 1   | 0  | 0  |   |    |   |    |    |
| "Viruses;Uroviricota;Caudoviricetes;Caudoviricetes__na;Caudoviricetes__na;Caudoviricetes__na;Myoviridae_s |    |    |    |    |    |     |    |    |   |    |   |    |    |
| p._ct3tv2"                                                                                                | 0  | 0  | 0  | 0  | 0  | 0   | 0  | 0  | 0 | 0  | 0 | 0  | 0  |
|                                                                                                           | 11 | 6  | 16 | 22 | 21 | 162 | 0  | 0  | 0 | 0  | 0 | 0  | 0  |
|                                                                                                           | 0  | 0  | 0  | 0  | 0  | 0   | 0  | 0  | 0 | 0  | 0 | 32 | 21 |
|                                                                                                           | 5  | 1  | 10 | 57 | 9  | 10  | 72 | 16 | 0 | 2  | 0 | 0  | 0  |
|                                                                                                           | 0  | 8  | 0  | 12 | 18 | 3   | 3  | 0  | 0 | 0  | 0 | 0  | 0  |
|                                                                                                           | 0  | 0  | 0  | 0  | 0  | 0   | 0  | 0  |   |    |   |    |    |
| "Viruses;Uroviricota;Caudoviricetes;Caudoviricetes__na;Caudoviricetes__na;Caudoviricetes__na;Myoviridae_s |    |    |    |    |    |     |    |    |   |    |   |    |    |
| p._ct49F125"                                                                                              | 0  | 0  | 0  | 0  | 0  | 0   | 0  | 0  | 0 | 0  | 0 | 0  | 0  |
|                                                                                                           | 31 | 11 | 21 | 35 | 44 | 82  | 0  | 0  | 0 | 0  | 1 | 0  | 1  |
|                                                                                                           | 0  | 0  | 0  | 0  | 0  | 0   | 0  | 0  | 0 | 0  | 0 | 11 | 8  |
|                                                                                                           | 0  | 0  | 0  | 0  | 0  | 0   | 0  | 0  | 0 | 0  | 1 | 0  | 0  |
|                                                                                                           | 0  | 0  | 0  | 0  | 0  | 0   | 0  | 0  | 0 | 0  | 0 | 0  | 0  |
|                                                                                                           | 0  | 0  | 1  | 0  | 0  | 0   | 0  | 0  |   |    |   |    |    |
| "Viruses;Uroviricota;Caudoviricetes;Caudoviricetes__na;Caudoviricetes__na;Caudoviricetes__na;Myoviridae_s |    |    |    |    |    |     |    |    |   |    |   |    |    |
| p._ct4yW2"                                                                                                | 0  | 0  | 0  | 0  | 0  | 0   | 0  | 0  | 0 | 0  | 0 | 0  | 0  |
|                                                                                                           | 10 | 10 | 13 | 9  | 3  | 38  | 0  | 3  | 0 | 0  | 0 | 0  | 0  |
|                                                                                                           | 0  | 0  | 0  | 1  | 0  | 1   | 0  | 0  | 0 | 0  | 0 | 31 | 11 |
|                                                                                                           | 0  | 0  | 0  | 0  | 2  | 1   | 0  | 0  | 0 | 0  | 0 | 0  | 0  |
|                                                                                                           | 0  | 0  | 0  | 3  | 1  | 0   | 0  | 0  | 0 | 0  | 0 | 0  | 0  |
|                                                                                                           | 0  | 0  | 2  | 0  | 0  | 0   | 0  | 0  |   |    |   |    |    |
| "Viruses;Uroviricota;Caudoviricetes;Caudoviricetes__na;Caudoviricetes__na;Caudoviricetes__na;Myoviridae_s |    |    |    |    |    |     |    |    |   |    |   |    |    |
| p._ct55Z2"                                                                                                | 0  | 0  | 0  | 0  | 0  | 0   | 0  | 0  | 0 | 0  | 0 | 0  | 0  |
|                                                                                                           | 0  | 0  | 0  | 0  | 0  | 0   | 0  | 0  | 0 | 0  | 0 | 0  | 0  |
|                                                                                                           | 0  | 0  | 0  | 0  | 0  | 0   | 0  | 0  | 0 | 0  | 0 | 0  | 0  |
|                                                                                                           | 0  | 0  | 0  | 0  | 0  | 1   | 1  | 0  | 0 | 0  | 0 | 0  | 0  |
|                                                                                                           | 0  | 0  | 0  | 1  | 0  | 0   | 0  | 0  | 0 | 0  | 0 | 0  | 0  |
|                                                                                                           | 0  | 0  | 0  | 0  | 0  | 0   | 0  | 0  |   |    |   |    |    |
| "Viruses;Uroviricota;Caudoviricetes;Caudoviricetes__na;Caudoviricetes__na;Caudoviricetes__na;Myoviridae_s |    |    |    |    |    |     |    |    |   |    |   |    |    |
| p._ct5hB2"                                                                                                | 0  | 0  | 0  | 0  | 0  | 0   | 0  | 0  | 0 | 0  | 0 | 0  | 0  |
|                                                                                                           | 0  | 0  | 0  | 0  | 0  | 0   | 2  | 0  | 0 | 0  | 0 | 0  | 0  |
|                                                                                                           | 0  | 0  | 0  | 0  | 0  | 0   | 0  | 0  | 0 | 1  | 0 | 0  | 0  |
|                                                                                                           | 0  | 0  | 0  | 0  | 2  | 3   | 0  | 0  | 0 | 0  | 0 | 0  | 0  |

[illegible]

[illegible]

|                                                                                                           |   |     |    |   |   |   |    |   |   |   |   |   |
|-----------------------------------------------------------------------------------------------------------|---|-----|----|---|---|---|----|---|---|---|---|---|
| 0                                                                                                         | 0 | 0   | 0  | 2 | 0 | 0 | 0  | 0 | 0 | 0 | 0 | 0 |
| 0                                                                                                         | 0 | 0   | 0  | 0 | 0 | 0 | 0  |   |   |   |   |   |
| "Viruses;Uroviricota;Caudoviricetes;Caudoviricetes__na;Caudoviricetes__na;Caudoviricetes__na;Myoviridae_s |   |     |    |   |   |   |    |   |   |   |   |   |
| p_ct8Eu10"                                                                                                | 0 | 0   | 0  | 0 | 0 | 0 | 0  | 0 | 0 | 0 | 0 | 0 |
| 0                                                                                                         | 0 | 0   | 0  | 0 | 0 | 3 | 2  | 0 | 0 | 1 | 0 | 0 |
| 0                                                                                                         | 0 | 0   | 0  | 0 | 0 | 0 | 0  | 0 | 0 | 0 | 0 | 0 |
| 0                                                                                                         | 0 | 0   | 0  | 0 | 0 | 0 | 0  | 0 | 0 | 1 | 3 | 0 |
| 0                                                                                                         | 0 | 170 | 0  | 0 | 0 | 0 | 0  | 0 | 0 | 0 | 0 | 0 |
| 0                                                                                                         | 0 | 0   | 0  | 0 | 0 | 0 | 0  |   |   |   |   |   |
| "Viruses;Uroviricota;Caudoviricetes;Caudoviricetes__na;Caudoviricetes__na;Caudoviricetes__na;Myoviridae_s |   |     |    |   |   |   |    |   |   |   |   |   |
| p_ct8iP21"                                                                                                | 0 | 0   | 0  | 0 | 0 | 0 | 0  | 0 | 0 | 0 | 0 | 0 |
| 0                                                                                                         | 2 | 0   | 0  | 0 | 0 | 0 | 0  | 0 | 0 | 0 | 0 | 0 |
| 0                                                                                                         | 0 | 0   | 0  | 0 | 0 | 0 | 0  | 0 | 0 | 0 | 0 | 0 |
| 0                                                                                                         | 0 | 0   | 0  | 0 | 0 | 0 | 0  | 0 | 0 | 0 | 0 | 0 |
| 0                                                                                                         | 0 | 0   | 0  | 0 | 0 | 0 | 0  | 0 | 0 | 0 | 0 | 0 |
| 0                                                                                                         | 0 | 0   | 0  | 0 | 0 | 0 | 0  |   |   |   |   |   |
| "Viruses;Uroviricota;Caudoviricetes;Caudoviricetes__na;Caudoviricetes__na;Caudoviricetes__na;Myoviridae_s |   |     |    |   |   |   |    |   |   |   |   |   |
| p_ct8mY9"                                                                                                 | 0 | 0   | 0  | 0 | 0 | 0 | 0  | 0 | 0 | 0 | 0 | 0 |
| 1                                                                                                         | 0 | 0   | 0  | 0 | 0 | 0 | 0  | 0 | 0 | 0 | 0 | 0 |
| 0                                                                                                         | 1 | 0   | 0  | 0 | 0 | 0 | 0  | 0 | 0 | 0 | 0 | 1 |
| 0                                                                                                         | 0 | 0   | 0  | 0 | 0 | 0 | 0  | 0 | 0 | 0 | 0 | 0 |
| 0                                                                                                         | 0 | 0   | 0  | 1 | 0 | 0 | 0  | 0 | 0 | 0 | 0 | 0 |
| 0                                                                                                         | 0 | 0   | 1  | 0 | 0 | 0 | 0  |   |   |   |   |   |
| "Viruses;Uroviricota;Caudoviricetes;Caudoviricetes__na;Caudoviricetes__na;Caudoviricetes__na;Myoviridae_s |   |     |    |   |   |   |    |   |   |   |   |   |
| p_ct9dX1"                                                                                                 | 0 | 0   | 0  | 0 | 0 | 0 | 0  | 0 | 0 | 0 | 0 | 0 |
| 0                                                                                                         | 0 | 0   | 0  | 0 | 0 | 0 | 0  | 0 | 0 | 0 | 0 | 0 |
| 0                                                                                                         | 0 | 0   | 0  | 0 | 0 | 0 | 0  | 0 | 0 | 0 | 0 | 0 |
| 0                                                                                                         | 0 | 0   | 0  | 1 | 1 | 0 | 0  | 0 | 0 | 0 | 0 | 0 |
| 0                                                                                                         | 0 | 0   | 0  | 0 | 0 | 0 | 0  | 0 | 5 | 3 | 0 | 0 |
| 0                                                                                                         | 0 | 32  | 34 | 0 | 0 | 0 | 0  |   |   |   |   |   |
| "Viruses;Uroviricota;Caudoviricetes;Caudoviricetes__na;Caudoviricetes__na;Caudoviricetes__na;Myoviridae_s |   |     |    |   |   |   |    |   |   |   |   |   |
| p_ct9Fw19"                                                                                                | 0 | 0   | 0  | 0 | 0 | 0 | 0  | 0 | 0 | 0 | 0 | 0 |
| 0                                                                                                         | 0 | 0   | 0  | 0 | 0 | 0 | 0  | 0 | 0 | 0 | 0 | 0 |
| 0                                                                                                         | 0 | 0   | 0  | 0 | 0 | 0 | 0  | 0 | 0 | 0 | 0 | 0 |
| 0                                                                                                         | 0 | 0   | 0  | 0 | 0 | 0 | 0  | 0 | 0 | 0 | 0 | 0 |
| 0                                                                                                         | 0 | 0   | 0  | 2 | 0 | 0 | 0  | 0 | 0 | 0 | 0 | 0 |
| 0                                                                                                         | 0 | 0   | 0  | 0 | 0 | 0 | 0  |   |   |   |   |   |
| "Viruses;Uroviricota;Caudoviricetes;Caudoviricetes__na;Caudoviricetes__na;Caudoviricetes__na;Myoviridae_s |   |     |    |   |   |   |    |   |   |   |   |   |
| p_ct9MV2"                                                                                                 | 0 | 0   | 0  | 0 | 0 | 0 | 0  | 0 | 0 | 0 | 0 | 0 |
| 3                                                                                                         | 6 | 0   | 0  | 0 | 0 | 0 | 3  | 0 | 0 | 0 | 0 | 4 |
| 6                                                                                                         | 1 | 0   | 0  | 0 | 1 | 0 | 0  | 0 | 0 | 0 | 0 | 0 |
| 0                                                                                                         | 0 | 0   | 0  | 0 | 1 | 0 | 0  | 0 | 0 | 3 | 1 | 0 |
| 1                                                                                                         | 0 | 0   | 2  | 0 | 0 | 0 | 0  | 0 | 0 | 0 | 0 | 0 |
| 0                                                                                                         | 0 | 1   | 0  | 0 | 0 | 0 | 0  |   |   |   |   |   |
| "Viruses;Uroviricota;Caudoviricetes;Caudoviricetes__na;Caudoviricetes__na;Caudoviricetes__na;Myoviridae_s |   |     |    |   |   |   |    |   |   |   |   |   |
| p_ct9Ns12"                                                                                                | 0 | 0   | 0  | 0 | 0 | 0 | 0  | 0 | 0 | 0 | 0 | 0 |
| 0                                                                                                         | 0 | 0   | 0  | 0 | 0 | 7 | 13 | 1 | 4 | 1 | 1 | 0 |
| 0                                                                                                         | 0 | 0   | 0  | 0 | 0 | 0 | 0  | 0 | 0 | 0 | 0 | 0 |
| 0                                                                                                         | 0 | 0   | 0  | 0 | 0 | 0 | 0  | 0 | 0 | 0 | 0 | 0 |



[illegible]

[illegible]

[illegible]

[illegible]

[illegible]

|                                                                                                           |    |    |    |    |    |   |   |   |   |   |   |   |   |
|-----------------------------------------------------------------------------------------------------------|----|----|----|----|----|---|---|---|---|---|---|---|---|
| 0                                                                                                         | 0  | 0  | 0  | 0  | 0  | 0 | 0 | 0 | 0 | 0 | 0 | 0 | 0 |
| 0                                                                                                         | 0  | 1  | 0  | 0  | 0  | 0 | 0 | 0 | 0 | 0 | 0 | 0 | 0 |
| "Viruses;Uroviricota;Caudoviricetes;Caudoviricetes__na;Caudoviricetes__na;Caudoviricetes__na;Myoviridae_s |    |    |    |    |    |   |   |   |   |   |   |   |   |
| p_ctGjZ5"                                                                                                 | 0  | 0  | 0  | 0  | 0  | 0 | 0 | 0 | 0 | 0 | 0 | 0 | 0 |
| 0                                                                                                         | 0  | 0  | 0  | 0  | 0  | 0 | 0 | 0 | 0 | 0 | 0 | 0 | 0 |
| 0                                                                                                         | 0  | 0  | 0  | 0  | 0  | 0 | 0 | 0 | 0 | 0 | 0 | 0 | 0 |
| 0                                                                                                         | 0  | 0  | 0  | 0  | 0  | 0 | 0 | 0 | 0 | 0 | 0 | 0 | 0 |
| 0                                                                                                         | 0  | 0  | 0  | 0  | 0  | 0 | 0 | 0 | 0 | 0 | 0 | 0 | 0 |
| 0                                                                                                         | 0  | 0  | 1  | 0  | 0  | 0 | 0 |   |   |   |   |   |   |
| "Viruses;Uroviricota;Caudoviricetes;Caudoviricetes__na;Caudoviricetes__na;Caudoviricetes__na;Myoviridae_s |    |    |    |    |    |   |   |   |   |   |   |   |   |
| p_ctGk74"                                                                                                 | 0  | 0  | 0  | 0  | 0  | 0 | 0 | 0 | 0 | 0 | 0 | 0 | 0 |
| 2                                                                                                         | 9  | 0  | 0  | 0  | 0  | 0 | 0 | 0 | 0 | 0 | 0 | 0 | 0 |
| 0                                                                                                         | 0  | 0  | 0  | 0  | 0  | 0 | 0 | 0 | 0 | 0 | 0 | 0 | 0 |
| 0                                                                                                         | 0  | 0  | 0  | 0  | 0  | 0 | 0 | 0 | 0 | 0 | 0 | 0 | 0 |
| 0                                                                                                         | 0  | 0  | 0  | 0  | 0  | 0 | 0 | 0 | 0 | 0 | 0 | 0 | 0 |
| 0                                                                                                         | 0  | 0  | 0  | 0  | 0  | 0 | 0 |   |   |   |   |   |   |
| "Viruses;Uroviricota;Caudoviricetes;Caudoviricetes__na;Caudoviricetes__na;Caudoviricetes__na;Myoviridae_s |    |    |    |    |    |   |   |   |   |   |   |   |   |
| p_ctgpd8"                                                                                                 | 0  | 0  | 0  | 0  | 0  | 0 | 0 | 0 | 0 | 0 | 0 | 0 | 0 |
| 0                                                                                                         | 0  | 0  | 0  | 0  | 0  | 0 | 0 | 0 | 0 | 0 | 0 | 0 | 0 |
| 0                                                                                                         | 0  | 0  | 0  | 0  | 0  | 0 | 0 | 0 | 0 | 0 | 0 | 3 | 6 |
| 0                                                                                                         | 0  | 0  | 0  | 0  | 0  | 0 | 0 | 0 | 0 | 0 | 0 | 1 | 0 |
| 0                                                                                                         | 0  | 0  | 0  | 0  | 0  | 0 | 0 | 0 | 0 | 0 | 0 | 0 | 0 |
| 0                                                                                                         | 0  | 0  | 0  | 0  | 0  | 0 | 0 |   |   |   |   |   |   |
| "Viruses;Uroviricota;Caudoviricetes;Caudoviricetes__na;Caudoviricetes__na;Caudoviricetes__na;Myoviridae_s |    |    |    |    |    |   |   |   |   |   |   |   |   |
| p_ctGRa7"                                                                                                 | 0  | 0  | 0  | 0  | 0  | 0 | 0 | 0 | 0 | 0 | 0 | 0 | 0 |
| 0                                                                                                         | 0  | 0  | 0  | 0  | 0  | 0 | 0 | 0 | 0 | 0 | 0 | 0 | 0 |
| 0                                                                                                         | 0  | 0  | 0  | 0  | 0  | 0 | 0 | 0 | 0 | 0 | 0 | 0 | 0 |
| 0                                                                                                         | 0  | 0  | 0  | 0  | 0  | 0 | 0 | 0 | 0 | 0 | 2 | 1 | 0 |
| 0                                                                                                         | 0  | 0  | 1  | 0  | 0  | 0 | 0 | 0 | 0 | 0 | 0 | 0 | 0 |
| 0                                                                                                         | 0  | 0  | 0  | 0  | 0  | 0 | 0 |   |   |   |   |   |   |
| "Viruses;Uroviricota;Caudoviricetes;Caudoviricetes__na;Caudoviricetes__na;Caudoviricetes__na;Myoviridae_s |    |    |    |    |    |   |   |   |   |   |   |   |   |
| p_ctgXa1"                                                                                                 | 0  | 0  | 0  | 0  | 0  | 0 | 0 | 0 | 0 | 0 | 0 | 0 | 0 |
| 0                                                                                                         | 0  | 0  | 0  | 0  | 0  | 0 | 0 | 0 | 0 | 0 | 0 | 0 | 0 |
| 0                                                                                                         | 0  | 0  | 0  | 0  | 0  | 0 | 0 | 0 | 0 | 0 | 0 | 1 | 0 |
| 0                                                                                                         | 0  | 0  | 0  | 0  | 0  | 0 | 0 | 0 | 0 | 0 | 0 | 0 | 0 |
| 0                                                                                                         | 0  | 0  | 0  | 0  | 0  | 0 | 0 | 0 | 0 | 0 | 1 | 0 | 0 |
| 0                                                                                                         | 0  | 1  | 0  | 0  | 0  | 0 | 0 |   |   |   |   |   |   |
| "Viruses;Uroviricota;Caudoviricetes;Caudoviricetes__na;Caudoviricetes__na;Caudoviricetes__na;Myoviridae_s |    |    |    |    |    |   |   |   |   |   |   |   |   |
| p_ctgXL3"                                                                                                 | 0  | 0  | 0  | 0  | 0  | 0 | 0 | 0 | 0 | 0 | 0 | 0 | 0 |
| 11                                                                                                        | 17 | 26 | 10 | 50 | 13 | 0 | 0 | 0 | 0 | 0 | 1 | 0 | 0 |
| 0                                                                                                         | 0  | 0  | 0  | 0  | 0  | 0 | 0 | 0 | 0 | 0 | 0 | 0 | 0 |
| 0                                                                                                         | 0  | 0  | 0  | 0  | 0  | 0 | 0 | 0 | 0 | 0 | 0 | 0 | 0 |
| 0                                                                                                         | 0  | 0  | 0  | 0  | 0  | 0 | 0 | 0 | 0 | 0 | 0 | 0 | 0 |
| 0                                                                                                         | 0  | 0  | 0  | 0  | 0  | 0 | 0 |   |   |   |   |   |   |
| "Viruses;Uroviricota;Caudoviricetes;Caudoviricetes__na;Caudoviricetes__na;Caudoviricetes__na;Myoviridae   |    |    |    |    |    |   |   |   |   |   |   |   |   |



|                                                                                                           |   |   |   |    |    |   |   |   |   |   |   |   |   |
|-----------------------------------------------------------------------------------------------------------|---|---|---|----|----|---|---|---|---|---|---|---|---|
|                                                                                                           | 0 | 0 | 0 | 0  | 1  | 0 | 0 | 0 | 0 | 0 | 0 | 0 | 0 |
|                                                                                                           | 0 | 0 | 0 | 0  | 0  | 0 | 0 | 0 | 0 | 0 | 0 | 0 | 0 |
| "Viruses;Uroviricota;Caudoviricetes;Caudoviricetes__na;Caudoviricetes__na;Caudoviricetes__na;Myoviridae_s |   |   |   |    |    |   |   |   |   |   |   |   |   |
| p_ctiIS8"                                                                                                 | 0 | 0 | 0 | 0  | 0  | 0 | 0 | 0 | 0 | 0 | 0 | 0 | 0 |
| 1                                                                                                         | 0 | 0 | 1 | 0  | 15 | 0 | 0 | 0 | 0 | 0 | 0 | 0 | 0 |
| 0                                                                                                         | 0 | 0 | 0 | 0  | 0  | 0 | 0 | 0 | 0 | 0 | 0 | 0 | 1 |
| 0                                                                                                         | 0 | 0 | 0 | 0  | 0  | 0 | 0 | 0 | 0 | 0 | 0 | 0 | 0 |
| 0                                                                                                         | 0 | 0 | 0 | 0  | 0  | 0 | 0 | 0 | 0 | 0 | 0 | 0 | 0 |
| 0                                                                                                         | 0 | 0 | 1 | 0  | 0  | 0 | 0 |   |   |   |   |   |   |
| "Viruses;Uroviricota;Caudoviricetes;Caudoviricetes__na;Caudoviricetes__na;Caudoviricetes__na;Myoviridae_s |   |   |   |    |    |   |   |   |   |   |   |   |   |
| p_ctiSH16"                                                                                                | 0 | 0 | 0 | 0  | 0  | 0 | 0 | 0 | 0 | 0 | 0 | 0 | 0 |
| 0                                                                                                         | 0 | 0 | 0 | 0  | 0  | 0 | 0 | 0 | 0 | 0 | 0 | 0 | 0 |
| 0                                                                                                         | 0 | 0 | 0 | 0  | 0  | 0 | 0 | 0 | 0 | 0 | 0 | 0 | 0 |
| 0                                                                                                         | 0 | 0 | 0 | 0  | 0  | 0 | 0 | 0 | 0 | 0 | 0 | 0 | 0 |
| 0                                                                                                         | 0 | 0 | 2 | 0  | 0  | 0 | 0 | 0 | 0 | 0 | 0 | 0 | 0 |
| 0                                                                                                         | 0 | 0 | 0 | 0  | 0  | 0 | 0 |   |   |   |   |   |   |
| "Viruses;Uroviricota;Caudoviricetes;Caudoviricetes__na;Caudoviricetes__na;Caudoviricetes__na;Myoviridae_s |   |   |   |    |    |   |   |   |   |   |   |   |   |
| p_ctItty1"                                                                                                | 0 | 0 | 0 | 0  | 0  | 0 | 0 | 0 | 0 | 0 | 3 | 0 | 0 |
| 0                                                                                                         | 0 | 0 | 0 | 0  | 0  | 0 | 0 | 0 | 0 | 0 | 0 | 0 | 0 |
| 0                                                                                                         | 0 | 0 | 0 | 0  | 0  | 0 | 0 | 0 | 0 | 0 | 0 | 0 | 0 |
| 0                                                                                                         | 0 | 0 | 0 | 0  | 0  | 0 | 0 | 0 | 0 | 0 | 0 | 0 | 0 |
| 0                                                                                                         | 0 | 0 | 0 | 0  | 0  | 0 | 0 | 0 | 0 | 0 | 0 | 0 | 0 |
| 0                                                                                                         | 0 | 0 | 0 | 0  | 0  | 0 | 0 |   |   |   |   |   |   |
| "Viruses;Uroviricota;Caudoviricetes;Caudoviricetes__na;Caudoviricetes__na;Caudoviricetes__na;Myoviridae_s |   |   |   |    |    |   |   |   |   |   |   |   |   |
| p_ctj994"                                                                                                 | 0 | 0 | 0 | 0  | 0  | 0 | 0 | 0 | 0 | 0 | 0 | 0 | 0 |
| 0                                                                                                         | 0 | 0 | 0 | 0  | 0  | 0 | 0 | 0 | 0 | 0 | 0 | 0 | 0 |
| 0                                                                                                         | 0 | 0 | 0 | 0  | 0  | 0 | 0 | 0 | 0 | 0 | 1 | 0 | 0 |
| 0                                                                                                         | 0 | 0 | 0 | 0  | 0  | 0 | 0 | 0 | 0 | 0 | 0 | 0 | 0 |
| 0                                                                                                         | 0 | 0 | 0 | 0  | 0  | 0 | 0 | 0 | 0 | 0 | 0 | 0 | 0 |
| 0                                                                                                         | 0 | 0 | 0 | 0  | 0  | 0 | 0 |   |   |   |   |   |   |
| "Viruses;Uroviricota;Caudoviricetes;Caudoviricetes__na;Caudoviricetes__na;Caudoviricetes__na;Myoviridae_s |   |   |   |    |    |   |   |   |   |   |   |   |   |
| p_ctjH82"                                                                                                 | 0 | 0 | 0 | 0  | 0  | 0 | 0 | 0 | 0 | 0 | 0 | 0 | 0 |
| 0                                                                                                         | 0 | 0 | 0 | 0  | 0  | 0 | 1 | 0 | 0 | 0 | 0 | 0 | 0 |
| 0                                                                                                         | 0 | 0 | 0 | 0  | 0  | 0 | 0 | 0 | 0 | 0 | 0 | 0 | 0 |
| 0                                                                                                         | 0 | 0 | 0 | 0  | 0  | 0 | 0 | 0 | 0 | 0 | 0 | 0 | 0 |
| 0                                                                                                         | 0 | 4 | 1 | 1  | 0  | 0 | 0 | 0 | 0 | 0 | 0 | 0 | 0 |
| 0                                                                                                         | 0 | 3 | 7 | 0  | 0  | 0 | 0 |   |   |   |   |   |   |
| "Viruses;Uroviricota;Caudoviricetes;Caudoviricetes__na;Caudoviricetes__na;Caudoviricetes__na;Myoviridae_s |   |   |   |    |    |   |   |   |   |   |   |   |   |
| p_ctK7P4"                                                                                                 | 0 | 0 | 0 | 0  | 0  | 0 | 0 | 0 | 0 | 0 | 0 | 0 | 0 |
| 0                                                                                                         | 0 | 0 | 0 | 0  | 0  | 0 | 0 | 0 | 0 | 0 | 0 | 0 | 0 |
| 0                                                                                                         | 0 | 0 | 0 | 0  | 0  | 0 | 0 | 0 | 0 | 0 | 0 | 0 | 0 |
| 0                                                                                                         | 0 | 0 | 0 | 0  | 0  | 0 | 0 | 0 | 0 | 0 | 0 | 0 | 0 |
| 0                                                                                                         | 0 | 0 | 2 | 10 | 0  | 0 | 0 | 0 | 0 | 0 | 0 | 0 | 0 |
| 0                                                                                                         | 0 | 0 | 0 | 0  | 0  | 0 | 0 |   |   |   |   |   |   |
| "Viruses;Uroviricota;Caudoviricetes;Caudoviricetes__na;Caudoviricetes__na;Caudoviricetes__na;Myoviridae_s |   |   |   |    |    |   |   |   |   |   |   |   |   |



|                                                                                                           |   |    |    |   |   |   |   |   |   |   |   |   |
|-----------------------------------------------------------------------------------------------------------|---|----|----|---|---|---|---|---|---|---|---|---|
| 0                                                                                                         | 0 | 0  | 0  | 0 | 0 | 0 | 0 | 0 | 0 | 0 | 0 | 0 |
| 0                                                                                                         | 0 | 0  | 0  | 0 | 0 | 0 | 0 |   |   |   |   |   |
| "Viruses;Uroviricota;Caudoviricetes;Caudoviricetes__na;Caudoviricetes__na;Caudoviricetes__na;Myoviridae_s |   |    |    |   |   |   |   |   |   |   |   |   |
| p_ctKkB1"                                                                                                 | 0 | 0  | 0  | 0 | 0 | 0 | 0 | 0 | 0 | 0 | 0 | 0 |
| 0                                                                                                         | 0 | 0  | 0  | 0 | 0 | 0 | 0 | 0 | 0 | 0 | 0 | 0 |
| 0                                                                                                         | 0 | 0  | 0  | 0 | 0 | 0 | 0 | 0 | 0 | 0 | 0 | 0 |
| 0                                                                                                         | 0 | 0  | 0  | 0 | 0 | 0 | 0 | 0 | 0 | 0 | 0 | 0 |
| 0                                                                                                         | 0 | 0  | 1  | 1 | 0 | 0 | 0 | 0 | 0 | 0 | 0 | 0 |
| 0                                                                                                         | 0 | 0  | 0  | 0 | 0 | 0 | 0 |   |   |   |   |   |
| "Viruses;Uroviricota;Caudoviricetes;Caudoviricetes__na;Caudoviricetes__na;Caudoviricetes__na;Myoviridae_s |   |    |    |   |   |   |   |   |   |   |   |   |
| p_ctkOm7"                                                                                                 | 0 | 0  | 0  | 0 | 0 | 0 | 0 | 0 | 0 | 0 | 0 | 0 |
| 2                                                                                                         | 0 | 0  | 0  | 0 | 0 | 1 | 2 | 0 | 0 | 0 | 0 | 0 |
| 0                                                                                                         | 0 | 0  | 0  | 0 | 4 | 6 | 0 | 0 | 1 | 0 | 3 | 4 |
| 0                                                                                                         | 0 | 0  | 0  | 0 | 0 | 0 | 0 | 1 | 0 | 3 | 0 | 1 |
| 0                                                                                                         | 0 | 15 | 3  | 4 | 1 | 0 | 0 | 0 | 2 | 0 | 0 | 0 |
| 0                                                                                                         | 0 | 5  | 4  | 0 | 0 | 0 | 0 |   |   |   |   |   |
| "Viruses;Uroviricota;Caudoviricetes;Caudoviricetes__na;Caudoviricetes__na;Caudoviricetes__na;Myoviridae_s |   |    |    |   |   |   |   |   |   |   |   |   |
| p_ctKZW4"                                                                                                 | 0 | 0  | 0  | 0 | 0 | 0 | 0 | 0 | 0 | 0 | 0 | 0 |
| 0                                                                                                         | 0 | 0  | 0  | 0 | 0 | 0 | 0 | 0 | 0 | 0 | 0 | 0 |
| 0                                                                                                         | 0 | 0  | 0  | 0 | 0 | 0 | 0 | 0 | 0 | 0 | 0 | 0 |
| 0                                                                                                         | 0 | 0  | 10 | 0 | 0 | 0 | 0 | 0 | 0 | 0 | 0 | 0 |
| 0                                                                                                         | 0 | 0  | 0  | 0 | 0 | 0 | 0 | 0 | 0 | 0 | 0 | 0 |
| 0                                                                                                         | 0 | 0  | 0  | 0 | 0 | 0 | 0 |   |   |   |   |   |
| "Viruses;Uroviricota;Caudoviricetes;Caudoviricetes__na;Caudoviricetes__na;Caudoviricetes__na;Myoviridae_s |   |    |    |   |   |   |   |   |   |   |   |   |
| p_ctlD98"                                                                                                 | 0 | 0  | 0  | 0 | 0 | 0 | 0 | 0 | 0 | 0 | 0 | 0 |
| 0                                                                                                         | 0 | 0  | 0  | 0 | 0 | 0 | 1 | 0 | 0 | 0 | 0 | 0 |
| 0                                                                                                         | 0 | 0  | 0  | 0 | 0 | 0 | 0 | 0 | 0 | 0 | 0 | 0 |
| 0                                                                                                         | 0 | 0  | 0  | 0 | 1 | 0 | 0 | 0 | 0 | 0 | 1 | 0 |
| 0                                                                                                         | 0 | 0  | 0  | 0 | 0 | 0 | 0 | 0 | 0 | 0 | 0 | 0 |
| 0                                                                                                         | 0 | 0  | 0  | 0 | 0 | 0 | 0 |   |   |   |   |   |
| "Viruses;Uroviricota;Caudoviricetes;Caudoviricetes__na;Caudoviricetes__na;Caudoviricetes__na;Myoviridae_s |   |    |    |   |   |   |   |   |   |   |   |   |
| p_ctLGX4"                                                                                                 | 0 | 0  | 0  | 0 | 0 | 0 | 0 | 0 | 0 | 0 | 0 | 0 |
| 1                                                                                                         | 0 | 0  | 0  | 0 | 0 | 0 | 0 | 0 | 0 | 0 | 0 | 0 |
| 0                                                                                                         | 0 | 0  | 0  | 0 | 0 | 0 | 0 | 0 | 0 | 0 | 0 | 0 |
| 0                                                                                                         | 0 | 0  | 0  | 0 | 0 | 0 | 0 | 0 | 0 | 0 | 0 | 0 |
| 0                                                                                                         | 0 | 0  | 0  | 0 | 0 | 0 | 0 | 0 | 0 | 0 | 0 | 0 |
| 0                                                                                                         | 0 | 0  | 0  | 0 | 0 | 0 | 0 |   |   |   |   |   |
| "Viruses;Uroviricota;Caudoviricetes;Caudoviricetes__na;Caudoviricetes__na;Caudoviricetes__na;Myoviridae_s |   |    |    |   |   |   |   |   |   |   |   |   |
| p_ctLjW1"                                                                                                 | 0 | 0  | 0  | 0 | 0 | 0 | 0 | 0 | 0 | 0 | 0 | 0 |
| 0                                                                                                         | 0 | 0  | 0  | 0 | 0 | 0 | 0 | 0 | 0 | 0 | 0 | 0 |
| 0                                                                                                         | 0 | 0  | 0  | 0 | 0 | 0 | 0 | 0 | 0 | 0 | 0 | 0 |
| 0                                                                                                         | 0 | 0  | 0  | 0 | 1 | 0 | 0 | 0 | 0 | 0 | 0 | 0 |
| 0                                                                                                         | 0 | 0  | 0  | 0 | 0 | 0 | 0 | 0 | 0 | 0 | 0 | 0 |
| 0                                                                                                         | 0 | 0  | 0  | 0 | 0 | 0 | 0 |   |   |   |   |   |
| "Viruses;Uroviricota;Caudoviricetes;Caudoviricetes__na;Caudoviricetes__na;Caudoviricetes__na;Myoviridae_s |   |    |    |   |   |   |   |   |   |   |   |   |
| p_ctlnK45"                                                                                                | 0 | 0  | 0  | 0 | 0 | 0 | 0 | 0 | 0 | 0 | 0 | 0 |
| 0                                                                                                         | 0 | 0  | 0  | 0 | 0 | 0 | 0 | 0 | 0 | 0 | 0 | 0 |
| 0                                                                                                         | 0 | 0  | 0  | 0 | 0 | 0 | 0 | 0 | 0 | 0 | 1 | 0 |
| 0                                                                                                         | 0 | 0  | 0  | 0 | 0 | 0 | 0 | 0 | 0 | 0 | 0 | 0 |

[illegible]



[illegible]

[illegible]

|                                                                                                           |   |   |   |   |    |    |   |   |    |    |   |   |
|-----------------------------------------------------------------------------------------------------------|---|---|---|---|----|----|---|---|----|----|---|---|
| 0                                                                                                         | 0 | 0 | 0 | 0 | 0  | 0  | 0 | 0 | 0  | 0  | 0 | 0 |
| 0                                                                                                         | 0 | 0 | 0 | 0 | 0  | 0  | 0 |   |    |    |   |   |
| "Viruses;Uroviricota;Caudoviricetes;Caudoviricetes__na;Caudoviricetes__na;Caudoviricetes__na;Myoviridae_s |   |   |   |   |    |    |   |   |    |    |   |   |
| p._ctq9w2"                                                                                                | 0 | 0 | 0 | 0 | 0  | 0  | 0 | 0 | 0  | 0  | 0 | 0 |
| 0                                                                                                         | 0 | 0 | 0 | 1 | 0  | 0  | 0 | 0 | 0  | 0  | 0 | 0 |
| 0                                                                                                         | 0 | 0 | 0 | 0 | 0  | 0  | 0 | 0 | 0  | 0  | 1 | 0 |
| 0                                                                                                         | 0 | 0 | 0 | 0 | 0  | 0  | 0 | 0 | 0  | 0  | 0 | 0 |
| 0                                                                                                         | 0 | 0 | 0 | 0 | 0  | 0  | 0 | 0 | 0  | 1  | 0 | 0 |
| 0                                                                                                         | 0 | 0 | 1 | 0 | 0  | 0  | 0 |   |    |    |   |   |
| "Viruses;Uroviricota;Caudoviricetes;Caudoviricetes__na;Caudoviricetes__na;Caudoviricetes__na;Myoviridae_s |   |   |   |   |    |    |   |   |    |    |   |   |
| p._ctQf419"                                                                                               | 0 | 0 | 0 | 0 | 0  | 0  | 0 | 0 | 0  | 0  | 0 | 0 |
| 1                                                                                                         | 3 | 0 | 0 | 0 | 0  | 0  | 1 | 0 | 0  | 0  | 0 | 0 |
| 0                                                                                                         | 0 | 0 | 0 | 0 | 0  | 0  | 0 | 0 | 0  | 0  | 0 | 0 |
| 0                                                                                                         | 0 | 0 | 0 | 3 | 0  | 0  | 0 | 0 | 0  | 3  | 2 | 0 |
| 0                                                                                                         | 0 | 0 | 0 | 0 | 0  | 0  | 0 | 0 | 85 | 23 | 0 | 0 |
| 0                                                                                                         | 0 | 6 | 2 | 0 | 0  | 0  | 0 |   |    |    |   |   |
| "Viruses;Uroviricota;Caudoviricetes;Caudoviricetes__na;Caudoviricetes__na;Caudoviricetes__na;Myoviridae_s |   |   |   |   |    |    |   |   |    |    |   |   |
| p._ctqfO1"                                                                                                | 0 | 0 | 0 | 0 | 0  | 0  | 0 | 0 | 0  | 0  | 0 | 0 |
| 0                                                                                                         | 0 | 0 | 0 | 0 | 0  | 0  | 0 | 0 | 0  | 0  | 0 | 0 |
| 0                                                                                                         | 0 | 0 | 0 | 0 | 0  | 0  | 0 | 0 | 0  | 0  | 0 | 0 |
| 0                                                                                                         | 0 | 0 | 0 | 0 | 0  | 0  | 0 | 0 | 0  | 0  | 0 | 0 |
| 0                                                                                                         | 0 | 0 | 0 | 0 | 0  | 0  | 0 | 0 | 0  | 0  | 0 | 0 |
| 0                                                                                                         | 0 | 1 | 0 | 0 | 0  | 0  | 0 |   |    |    |   |   |
| "Viruses;Uroviricota;Caudoviricetes;Caudoviricetes__na;Caudoviricetes__na;Caudoviricetes__na;Myoviridae_s |   |   |   |   |    |    |   |   |    |    |   |   |
| p._ctqgO2"                                                                                                | 0 | 0 | 0 | 0 | 0  | 0  | 0 | 0 | 0  | 0  | 0 | 0 |
| 0                                                                                                         | 0 | 0 | 0 | 0 | 0  | 0  | 0 | 0 | 0  | 0  | 0 | 0 |
| 0                                                                                                         | 0 | 0 | 0 | 0 | 0  | 0  | 0 | 0 | 0  | 0  | 0 | 0 |
| 0                                                                                                         | 0 | 0 | 0 | 0 | 0  | 0  | 0 | 0 | 0  | 0  | 0 | 0 |
| 0                                                                                                         | 0 | 0 | 0 | 0 | 0  | 0  | 0 | 0 | 0  | 0  | 0 | 0 |
| 0                                                                                                         | 0 | 1 | 0 | 0 | 0  | 0  | 0 |   |    |    |   |   |
| "Viruses;Uroviricota;Caudoviricetes;Caudoviricetes__na;Caudoviricetes__na;Caudoviricetes__na;Myoviridae_s |   |   |   |   |    |    |   |   |    |    |   |   |
| p._ctQQg4"                                                                                                | 0 | 0 | 0 | 0 | 0  | 0  | 0 | 0 | 0  | 0  | 0 | 0 |
| 0                                                                                                         | 0 | 0 | 0 | 0 | 0  | 0  | 0 | 0 | 0  | 0  | 0 | 0 |
| 0                                                                                                         | 0 | 0 | 0 | 0 | 0  | 0  | 0 | 0 | 0  | 0  | 0 | 0 |
| 0                                                                                                         | 0 | 0 | 2 | 0 | 0  | 0  | 0 | 8 | 0  | 0  | 0 | 0 |
| 0                                                                                                         | 0 | 0 | 0 | 0 | 0  | 0  | 0 | 0 | 0  | 0  | 0 | 0 |
| 0                                                                                                         | 0 | 0 | 0 | 0 | 0  | 0  | 0 |   |    |    |   |   |
| "Viruses;Uroviricota;Caudoviricetes;Caudoviricetes__na;Caudoviricetes__na;Caudoviricetes__na;Myoviridae_s |   |   |   |   |    |    |   |   |    |    |   |   |
| p._ctQYc56"                                                                                               | 0 | 0 | 0 | 0 | 0  | 0  | 0 | 0 | 0  | 0  | 0 | 0 |
| 0                                                                                                         | 0 | 0 | 1 | 0 | 0  | 0  | 0 | 0 | 0  | 0  | 0 | 0 |
| 0                                                                                                         | 0 | 0 | 0 | 0 | 0  | 0  | 0 | 0 | 0  | 0  | 2 | 1 |
| 0                                                                                                         | 0 | 0 | 0 | 0 | 0  | 0  | 0 | 0 | 0  | 0  | 0 | 0 |
| 0                                                                                                         | 0 | 0 | 0 | 0 | 0  | 0  | 0 | 0 | 0  | 0  | 0 | 0 |
| 0                                                                                                         | 0 | 0 | 0 | 0 | 0  | 0  | 0 |   |    |    |   |   |
| "Viruses;Uroviricota;Caudoviricetes;Caudoviricetes__na;Caudoviricetes__na;Caudoviricetes__na;Myoviridae_s |   |   |   |   |    |    |   |   |    |    |   |   |
| p._ctr0w28"                                                                                               | 0 | 0 | 0 | 0 | 0  | 0  | 0 | 0 | 0  | 0  | 0 | 0 |
| 0                                                                                                         | 0 | 7 | 3 | 4 | 28 | 0  | 0 | 0 | 0  | 0  | 0 | 0 |
| 0                                                                                                         | 0 | 0 | 0 | 0 | 0  | 0  | 0 | 0 | 0  | 0  | 0 | 0 |
| 0                                                                                                         | 0 | 0 | 0 | 5 | 2  | 12 | 0 | 0 | 0  | 0  | 1 | 0 |

[illegible]

|                                                                                                           |   |   |   |     |   |   |   |    |   |   |     |     |
|-----------------------------------------------------------------------------------------------------------|---|---|---|-----|---|---|---|----|---|---|-----|-----|
|                                                                                                           | 0 | 0 | 0 | 0   | 0 | 0 | 0 | 0  | 0 | 0 | 0   | 0   |
|                                                                                                           | 0 | 0 | 1 | 2   | 0 | 0 | 0 | 0  |   |   |     |     |
| "Viruses;Uroviricota;Caudoviricetes;Caudoviricetes__na;Caudoviricetes__na;Caudoviricetes__na;Myoviridae_s |   |   |   |     |   |   |   |    |   |   |     |     |
| p._ctsK93"                                                                                                | 0 | 0 | 0 | 0   | 0 | 0 | 0 | 0  | 0 | 0 | 0   | 0   |
|                                                                                                           | 0 | 0 | 5 | 0   | 3 | 0 | 0 | 0  | 0 | 0 | 0   | 0   |
|                                                                                                           | 0 | 0 | 0 | 0   | 0 | 0 | 0 | 0  | 0 | 0 | 0   | 0   |
|                                                                                                           | 0 | 0 | 0 | 0   | 0 | 0 | 0 | 0  | 0 | 0 | 0   | 0   |
|                                                                                                           | 0 | 0 | 0 | 0   | 0 | 0 | 0 | 0  | 0 | 0 | 0   | 0   |
|                                                                                                           | 0 | 0 | 0 | 0   | 0 | 0 | 0 | 0  | 0 | 0 | 0   | 0   |
|                                                                                                           | 0 | 0 | 0 | 0   | 0 | 0 | 0 |    |   |   |     |     |
| "Viruses;Uroviricota;Caudoviricetes;Caudoviricetes__na;Caudoviricetes__na;Caudoviricetes__na;Myoviridae_s |   |   |   |     |   |   |   |    |   |   |     |     |
| p._ctsQA11"                                                                                               | 0 | 0 | 0 | 0   | 0 | 0 | 0 | 0  | 0 | 0 | 0   | 0   |
|                                                                                                           | 0 | 0 | 0 | 0   | 0 | 0 | 0 | 0  | 0 | 0 | 0   | 0   |
|                                                                                                           | 0 | 0 | 0 | 0   | 0 | 0 | 0 | 0  | 0 | 0 | 0   | 0   |
|                                                                                                           | 0 | 0 | 0 | 0   | 0 | 0 | 0 | 0  | 0 | 0 | 0   | 0   |
|                                                                                                           | 0 | 1 | 0 | 0   | 0 | 0 | 0 | 0  | 0 | 0 | 0   | 0   |
|                                                                                                           | 0 | 0 | 0 | 0   | 0 | 0 | 0 |    |   |   |     |     |
| "Viruses;Uroviricota;Caudoviricetes;Caudoviricetes__na;Caudoviricetes__na;Caudoviricetes__na;Myoviridae_s |   |   |   |     |   |   |   |    |   |   |     |     |
| p._ctt8G1"                                                                                                | 0 | 0 | 0 | 0   | 0 | 0 | 0 | 0  | 0 | 0 | 0   | 0   |
|                                                                                                           | 2 | 1 | 0 | 0   | 0 | 0 | 0 | 1  | 0 | 0 | 0   | 3   |
|                                                                                                           | 1 | 0 | 0 | 1   | 0 | 0 | 0 | 0  | 0 | 0 | 115 | 254 |
|                                                                                                           | 2 | 4 | 0 | 640 | 1 | 0 | 0 | 0  | 0 | 0 | 1   | 0   |
|                                                                                                           | 0 | 5 | 1 | 0   | 0 | 0 | 0 | 0  | 1 | 0 | 0   | 0   |
|                                                                                                           | 0 | 0 | 0 | 1   | 0 | 0 | 0 |    |   |   |     |     |
| "Viruses;Uroviricota;Caudoviricetes;Caudoviricetes__na;Caudoviricetes__na;Caudoviricetes__na;Myoviridae_s |   |   |   |     |   |   |   |    |   |   |     |     |
| p._ctTfa5"                                                                                                | 0 | 0 | 0 | 0   | 0 | 0 | 0 | 0  | 0 | 0 | 0   | 0   |
|                                                                                                           | 0 | 0 | 0 | 0   | 0 | 0 | 0 | 0  | 0 | 0 | 0   | 1   |
|                                                                                                           | 0 | 3 | 0 | 1   | 0 | 0 | 0 | 0  | 0 | 0 | 0   | 0   |
|                                                                                                           | 0 | 0 | 1 | 0   | 3 | 3 | 4 | 0  | 0 | 0 | 2   | 1   |
|                                                                                                           | 0 | 0 | 0 | 0   | 0 | 0 | 0 | 0  | 0 | 0 | 0   | 0   |
|                                                                                                           | 0 | 0 | 0 | 0   | 0 | 0 | 0 |    |   |   |     |     |
| "Viruses;Uroviricota;Caudoviricetes;Caudoviricetes__na;Caudoviricetes__na;Caudoviricetes__na;Myoviridae_s |   |   |   |     |   |   |   |    |   |   |     |     |
| p._ctThM1"                                                                                                | 0 | 0 | 0 | 0   | 0 | 1 | 0 | 0  | 0 | 0 | 0   | 0   |
|                                                                                                           | 0 | 0 | 0 | 0   | 0 | 6 | 0 | 0  | 0 | 0 | 0   | 0   |
|                                                                                                           | 0 | 0 | 0 | 0   | 0 | 0 | 0 | 0  | 0 | 0 | 0   | 0   |
|                                                                                                           | 0 | 0 | 0 | 0   | 0 | 1 | 0 | 14 | 1 | 0 | 0   | 0   |
|                                                                                                           | 0 | 0 | 0 | 0   | 0 | 0 | 0 | 0  | 0 | 0 | 0   | 0   |
|                                                                                                           | 0 | 0 | 0 | 0   | 0 | 0 | 0 |    |   |   |     |     |
| "Viruses;Uroviricota;Caudoviricetes;Caudoviricetes__na;Caudoviricetes__na;Caudoviricetes__na;Myoviridae_s |   |   |   |     |   |   |   |    |   |   |     |     |
| p._ctTOM1"                                                                                                | 0 | 0 | 0 | 0   | 0 | 0 | 0 | 0  | 0 | 0 | 0   | 0   |
|                                                                                                           | 0 | 2 | 0 | 1   | 0 | 0 | 0 | 2  | 0 | 0 | 1   | 6   |
|                                                                                                           | 1 | 0 | 0 | 0   | 0 | 1 | 1 | 0  | 0 | 0 | 0   | 0   |
|                                                                                                           | 0 | 0 | 0 | 0   | 0 | 0 | 0 | 0  | 0 | 0 | 0   | 0   |
|                                                                                                           | 0 | 0 | 0 | 0   | 2 | 0 | 0 | 0  | 0 | 0 | 0   | 0   |
|                                                                                                           | 0 | 0 | 0 | 0   | 0 | 0 | 0 |    |   |   |     |     |
| "Viruses;Uroviricota;Caudoviricetes;Caudoviricetes__na;Caudoviricetes__na;Caudoviricetes__na;Myoviridae_s |   |   |   |     |   |   |   |    |   |   |     |     |
| p._cttp71"                                                                                                | 0 | 0 | 0 | 0   | 0 | 0 | 0 | 0  | 0 | 0 | 0   | 0   |
|                                                                                                           | 0 | 0 | 0 | 0   | 0 | 0 | 0 | 0  | 0 | 0 | 0   | 0   |
|                                                                                                           | 0 | 0 | 0 | 0   | 0 | 0 | 0 | 0  | 0 | 0 | 0   | 0   |
|                                                                                                           | 0 | 0 | 0 | 2   | 0 | 0 | 0 | 0  | 0 | 0 | 0   | 0   |



|                                                                                                           |   |   |   |    |   |   |   |   |   |    |   |   |
|-----------------------------------------------------------------------------------------------------------|---|---|---|----|---|---|---|---|---|----|---|---|
| 0                                                                                                         | 0 | 0 | 0 | 0  | 0 | 0 | 0 | 0 | 0 | 0  | 0 | 0 |
| 0                                                                                                         | 0 | 0 | 0 | 0  | 0 | 0 | 0 |   |   |    |   |   |
| "Viruses;Uroviricota;Caudoviricetes;Caudoviricetes__na;Caudoviricetes__na;Caudoviricetes__na;Myoviridae_s |   |   |   |    |   |   |   |   |   |    |   |   |
| p_ctTrm2"                                                                                                 | 0 | 0 | 0 | 0  | 0 | 0 | 0 | 0 | 0 | 0  | 0 | 0 |
| 0                                                                                                         | 1 | 0 | 0 | 0  | 0 | 0 | 0 | 0 | 0 | 0  | 0 | 0 |
| 0                                                                                                         | 0 | 0 | 0 | 0  | 0 | 0 | 0 | 0 | 0 | 0  | 1 | 4 |
| 0                                                                                                         | 0 | 0 | 0 | 0  | 0 | 0 | 0 | 0 | 0 | 0  | 0 | 0 |
| 0                                                                                                         | 0 | 0 | 0 | 0  | 0 | 0 | 0 | 0 | 2 | 0  | 0 | 0 |
| 0                                                                                                         | 0 | 1 | 1 | 0  | 0 | 0 | 0 |   |   |    |   |   |
| "Viruses;Uroviricota;Caudoviricetes;Caudoviricetes__na;Caudoviricetes__na;Caudoviricetes__na;Myoviridae_s |   |   |   |    |   |   |   |   |   |    |   |   |
| p_cttWQ44"                                                                                                | 0 | 0 | 0 | 0  | 0 | 0 | 0 | 0 | 0 | 0  | 0 | 0 |
| 0                                                                                                         | 1 | 1 | 0 | 0  | 0 | 0 | 0 | 0 | 0 | 0  | 0 | 0 |
| 0                                                                                                         | 0 | 0 | 0 | 0  | 0 | 0 | 0 | 0 | 0 | 0  | 7 | 2 |
| 2                                                                                                         | 0 | 0 | 0 | 0  | 0 | 0 | 0 | 0 | 0 | 0  | 0 | 0 |
| 0                                                                                                         | 0 | 0 | 9 | 12 | 0 | 0 | 0 | 0 | 0 | 0  | 0 | 0 |
| 0                                                                                                         | 0 | 5 | 6 | 0  | 0 | 0 | 0 |   |   |    |   |   |
| "Viruses;Uroviricota;Caudoviricetes;Caudoviricetes__na;Caudoviricetes__na;Caudoviricetes__na;Myoviridae_s |   |   |   |    |   |   |   |   |   |    |   |   |
| p_ctu6J18"                                                                                                | 0 | 0 | 0 | 0  | 0 | 0 | 0 | 0 | 0 | 0  | 0 | 0 |
| 0                                                                                                         | 0 | 0 | 0 | 0  | 0 | 0 | 3 | 0 | 1 | 0  | 0 | 0 |
| 1                                                                                                         | 0 | 0 | 0 | 0  | 0 | 1 | 0 | 0 | 0 | 0  | 0 | 1 |
| 0                                                                                                         | 0 | 0 | 0 | 1  | 0 | 0 | 0 | 0 | 0 | 0  | 0 | 0 |
| 0                                                                                                         | 0 | 0 | 5 | 4  | 0 | 0 | 0 | 0 | 0 | 3  | 0 | 0 |
| 0                                                                                                         | 0 | 3 | 1 | 0  | 0 | 0 | 0 |   |   |    |   |   |
| "Viruses;Uroviricota;Caudoviricetes;Caudoviricetes__na;Caudoviricetes__na;Caudoviricetes__na;Myoviridae_s |   |   |   |    |   |   |   |   |   |    |   |   |
| p_ctuIn11"                                                                                                | 0 | 0 | 0 | 0  | 0 | 0 | 0 | 0 | 0 | 0  | 0 | 0 |
| 0                                                                                                         | 0 | 0 | 0 | 0  | 0 | 0 | 0 | 0 | 0 | 0  | 0 | 0 |
| 0                                                                                                         | 0 | 0 | 0 | 0  | 2 | 2 | 0 | 0 | 3 | 0  | 0 | 0 |
| 0                                                                                                         | 0 | 0 | 0 | 0  | 0 | 0 | 0 | 0 | 0 | 0  | 0 | 0 |
| 0                                                                                                         | 0 | 0 | 0 | 0  | 0 | 0 | 0 | 0 | 0 | 0  | 0 | 0 |
| 0                                                                                                         | 0 | 0 | 0 | 0  | 0 | 0 | 0 |   |   |    |   |   |
| "Viruses;Uroviricota;Caudoviricetes;Caudoviricetes__na;Caudoviricetes__na;Caudoviricetes__na;Myoviridae_s |   |   |   |    |   |   |   |   |   |    |   |   |
| p_ctuSi15"                                                                                                | 0 | 0 | 0 | 0  | 0 | 0 | 0 | 0 | 0 | 0  | 0 | 0 |
| 0                                                                                                         | 0 | 0 | 0 | 0  | 0 | 0 | 0 | 0 | 0 | 0  | 0 | 7 |
| 9                                                                                                         | 0 | 0 | 0 | 0  | 0 | 0 | 0 | 0 | 0 | 0  | 1 | 0 |
| 0                                                                                                         | 0 | 0 | 0 | 0  | 0 | 0 | 0 | 0 | 0 | 17 | 8 | 0 |
| 0                                                                                                         | 0 | 0 | 0 | 2  | 0 | 0 | 0 | 0 | 0 | 0  | 0 | 0 |
| 0                                                                                                         | 0 | 6 | 7 | 0  | 0 | 0 | 0 |   |   |    |   |   |
| "Viruses;Uroviricota;Caudoviricetes;Caudoviricetes__na;Caudoviricetes__na;Caudoviricetes__na;Myoviridae_s |   |   |   |    |   |   |   |   |   |    |   |   |
| p_ctUX613"                                                                                                | 0 | 0 | 0 | 0  | 0 | 0 | 0 | 0 | 0 | 0  | 0 | 0 |
| 5                                                                                                         | 2 | 0 | 0 | 0  | 0 | 0 | 0 | 0 | 0 | 0  | 0 | 0 |
| 0                                                                                                         | 0 | 0 | 0 | 0  | 4 | 3 | 0 | 0 | 0 | 0  | 1 | 0 |
| 0                                                                                                         | 0 | 0 | 0 | 0  | 0 | 0 | 0 | 0 | 0 | 0  | 0 | 0 |
| 0                                                                                                         | 0 | 0 | 3 | 2  | 0 | 0 | 0 | 0 | 0 | 0  | 0 | 0 |
| 0                                                                                                         | 0 | 0 | 2 | 0  | 0 | 0 | 0 |   |   |    |   |   |
| "Viruses;Uroviricota;Caudoviricetes;Caudoviricetes__na;Caudoviricetes__na;Caudoviricetes__na;Myoviridae_s |   |   |   |    |   |   |   |   |   |    |   |   |
| p_ctv1i11"                                                                                                | 0 | 0 | 0 | 0  | 0 | 0 | 0 | 0 | 0 | 0  | 0 | 0 |
| 0                                                                                                         | 0 | 0 | 0 | 0  | 0 | 1 | 0 | 0 | 0 | 0  | 0 | 0 |
| 0                                                                                                         | 0 | 0 | 0 | 0  | 0 | 0 | 0 | 0 | 0 | 0  | 0 | 0 |
| 0                                                                                                         | 0 | 0 | 0 | 0  | 0 |   |   |   |   |    |   |   |

[illegible]

[illegible]

[illegible]

[illegible]

[illegible]

[illegible]

[illegible]



[illegible]

[illegible]

|                                                                                                            |    |     |    |   |    |    |   |   |    |   |   |    |
|------------------------------------------------------------------------------------------------------------|----|-----|----|---|----|----|---|---|----|---|---|----|
| 0                                                                                                          | 0  | 0   | 0  | 1 | 0  | 0  | 0 | 0 | 0  | 0 | 0 | 0  |
| 0                                                                                                          | 0  | 0   | 0  | 0 | 0  | 0  | 0 |   |    |   |   |    |
| "Viruses;Uroviricota;Caudoviricetes;Caudoviricetes__na;Caudoviricetes__na;Caudoviricetes__na;Podoviridae_s |    |     |    |   |    |    |   |   |    |   |   |    |
| p_ctDd04"                                                                                                  | 0  | 0   | 0  | 0 | 0  | 0  | 0 | 0 | 0  | 0 | 0 | 0  |
| 6                                                                                                          | 5  | 4   | 3  | 9 | 77 | 0  | 0 | 0 | 0  | 0 | 0 | 0  |
| 0                                                                                                          | 0  | 0   | 0  | 0 | 0  | 0  | 0 | 0 | 0  | 0 | 0 | 0  |
| 0                                                                                                          | 0  | 0   | 0  | 0 | 0  | 0  | 0 | 0 | 0  | 0 | 0 | 0  |
| 0                                                                                                          | 0  | 0   | 0  | 0 | 0  | 0  | 0 | 0 | 0  | 0 | 0 | 0  |
| 0                                                                                                          | 0  | 0   | 0  | 0 | 0  | 0  | 0 |   |    |   |   |    |
| "Viruses;Uroviricota;Caudoviricetes;Caudoviricetes__na;Caudoviricetes__na;Caudoviricetes__na;Podoviridae_s |    |     |    |   |    |    |   |   |    |   |   |    |
| p_ctDgT26"                                                                                                 | 0  | 0   | 0  | 0 | 0  | 0  | 0 | 0 | 0  | 0 | 0 | 0  |
| 0                                                                                                          | 0  | 0   | 0  | 0 | 0  | 0  | 0 | 0 | 0  | 0 | 0 | 0  |
| 1                                                                                                          | 0  | 0   | 0  | 0 | 0  | 0  | 0 | 0 | 0  | 0 | 0 | 0  |
| 0                                                                                                          | 0  | 0   | 0  | 0 | 0  | 0  | 0 | 0 | 0  | 0 | 0 | 0  |
| 0                                                                                                          | 0  | 172 | 0  | 0 | 0  | 0  | 0 | 0 | 0  | 0 | 0 | 0  |
| 0                                                                                                          | 0  | 7   | 12 | 2 | 3  | 0  | 0 |   |    |   |   |    |
| "Viruses;Uroviricota;Caudoviricetes;Caudoviricetes__na;Caudoviricetes__na;Caudoviricetes__na;Podoviridae_s |    |     |    |   |    |    |   |   |    |   |   |    |
| p_ctdKF3"                                                                                                  | 0  | 0   | 0  | 0 | 0  | 0  | 0 | 0 | 0  | 0 | 0 | 0  |
| 0                                                                                                          | 0  | 0   | 0  | 0 | 1  | 0  | 1 | 0 | 0  | 0 | 0 | 0  |
| 0                                                                                                          | 0  | 0   | 0  | 0 | 0  | 0  | 0 | 0 | 0  | 0 | 0 | 0  |
| 0                                                                                                          | 0  | 0   | 0  | 0 | 0  | 0  | 0 | 0 | 0  | 0 | 0 | 0  |
| 0                                                                                                          | 0  | 0   | 0  | 0 | 0  | 0  | 0 | 0 | 0  | 0 | 0 | 0  |
| 0                                                                                                          | 0  | 0   | 0  | 0 | 0  | 0  | 0 |   |    |   |   |    |
| "Viruses;Uroviricota;Caudoviricetes;Caudoviricetes__na;Caudoviricetes__na;Caudoviricetes__na;Podoviridae_s |    |     |    |   |    |    |   |   |    |   |   |    |
| p_ctdRZ1"                                                                                                  | 0  | 0   | 0  | 0 | 0  | 0  | 0 | 0 | 0  | 0 | 0 | 0  |
| 0                                                                                                          | 0  | 0   | 0  | 0 | 0  | 2  | 5 | 0 | 0  | 0 | 0 | 0  |
| 0                                                                                                          | 2  | 0   | 0  | 0 | 0  | 0  | 0 | 0 | 0  | 0 | 1 | 0  |
| 0                                                                                                          | 0  | 0   | 0  | 0 | 0  | 0  | 0 | 0 | 0  | 0 | 0 | 0  |
| 0                                                                                                          | 0  | 0   | 0  | 2 | 0  | 0  | 0 | 0 | 0  | 0 | 0 | 0  |
| 0                                                                                                          | 0  | 2   | 1  | 0 | 0  | 0  | 0 |   |    |   |   |    |
| "Viruses;Uroviricota;Caudoviricetes;Caudoviricetes__na;Caudoviricetes__na;Caudoviricetes__na;Podoviridae_s |    |     |    |   |    |    |   |   |    |   |   |    |
| p_ctfAL26"                                                                                                 | 0  | 0   | 0  | 0 | 0  | 0  | 0 | 0 | 0  | 0 | 0 | 0  |
| 0                                                                                                          | 0  | 0   | 0  | 0 | 0  | 0  | 0 | 0 | 0  | 0 | 0 | 0  |
| 0                                                                                                          | 0  | 0   | 0  | 0 | 0  | 0  | 0 | 0 | 0  | 0 | 0 | 0  |
| 0                                                                                                          | 0  | 0   | 0  | 0 | 0  | 0  | 0 | 0 | 0  | 0 | 0 | 0  |
| 0                                                                                                          | 0  | 0   | 8  | 4 | 0  | 0  | 0 | 0 | 0  | 0 | 0 | 0  |
| 0                                                                                                          | 0  | 0   | 0  | 0 | 0  | 0  | 0 |   |    |   |   |    |
| "Viruses;Uroviricota;Caudoviricetes;Caudoviricetes__na;Caudoviricetes__na;Caudoviricetes__na;Podoviridae_s |    |     |    |   |    |    |   |   |    |   |   |    |
| p_ctFkM10"                                                                                                 | 0  | 0   | 0  | 0 | 0  | 0  | 0 | 0 | 0  | 0 | 0 | 0  |
| 0                                                                                                          | 0  | 0   | 0  | 0 | 0  | 0  | 0 | 0 | 0  | 0 | 2 | 28 |
| 18                                                                                                         | 24 | 4   | 23 | 0 | 12 | 16 | 0 | 0 | 27 | 0 | 0 | 0  |
| 0                                                                                                          | 0  | 0   | 0  | 0 | 0  | 0  | 0 | 0 | 0  | 0 | 0 | 0  |
| 0                                                                                                          | 0  | 0   | 0  | 0 | 0  | 0  | 0 | 0 | 0  | 0 | 0 | 0  |
| 0                                                                                                          | 0  | 0   | 0  | 0 | 0  | 0  | 0 |   |    |   |   |    |
| "Viruses;Uroviricota;Caudoviricetes;Caudoviricetes__na;Caudoviricetes__na;Caudoviricetes__na;Podoviridae_s |    |     |    |   |    |    |   |   |    |   |   |    |
| p_ctfN46"                                                                                                  | 0  | 0   | 0  | 0 | 0  | 0  | 0 | 0 | 0  | 0 | 0 | 0  |
| 0                                                                                                          | 0  | 0   | 0  | 0 | 0  | 0  | 1 | 0 | 1  | 0 | 0 | 0  |
| 0                                                                                                          | 0  | 0   | 0  | 0 | 0  | 0  | 0 | 0 | 0  | 0 | 0 | 0  |
| 0                                                                                                          | 0  | 0   | 0  | 0 | 0  | 0  | 0 | 0 | 0  | 0 | 0 | 0  |

[illegible]

[illegible]

[illegible]

[illegible]

[illegible]



[illegible]

[illegible]

[illegible]

[illegible]

[illegible]

[illegible]

[illegible]





|                                                                                                            |   |   |    |    |    |    |   |   |   |   |   |   |
|------------------------------------------------------------------------------------------------------------|---|---|----|----|----|----|---|---|---|---|---|---|
| 0                                                                                                          | 0 | 0 | 0  | 0  | 0  | 0  | 0 | 0 | 0 | 0 | 0 | 0 |
| 0                                                                                                          | 0 | 0 | 0  | 0  | 0  | 0  | 0 | 0 | 0 |   |   |   |
| "Viruses;Uroviricota;Caudoviricetes;Caudoviricetes__na;Caudoviricetes__na;Caudoviricetes__na;Rhodobacter_p | 0 | 0 | 0  | 1  | 0  | 0  | 0 | 0 | 0 | 0 | 0 | 0 |
| phage_RcZahn"                                                                                              | 0 | 0 | 0  | 0  | 0  | 0  | 0 | 0 | 0 | 0 | 0 | 0 |
| 0                                                                                                          | 0 | 0 | 0  | 0  | 0  | 0  | 0 | 0 | 0 | 0 | 0 | 0 |
| 0                                                                                                          | 0 | 0 | 0  | 0  | 0  | 0  | 0 | 0 | 0 | 0 | 0 | 0 |
| 0                                                                                                          | 0 | 0 | 0  | 0  | 0  | 0  | 0 | 0 | 0 | 0 | 0 | 0 |
| 0                                                                                                          | 0 | 0 | 0  | 0  | 0  | 0  | 0 | 0 | 0 | 0 | 0 | 0 |
| 0                                                                                                          | 0 | 0 | 0  | 0  | 0  | 0  | 0 | 0 | 0 | 0 | 0 | 0 |
| 0                                                                                                          | 0 | 0 | 0  | 0  | 0  | 0  | 0 |   |   |   |   |   |
| "Viruses;Uroviricota;Caudoviricetes;Caudoviricetes__na;Caudoviricetes__na;Caudoviricetes__na;Rhodococcus_p | 0 | 0 | 0  | 0  | 0  | 6  | 0 | 0 | 0 | 0 | 0 | 0 |
| phage_Mbo2"                                                                                                | 0 | 0 | 0  | 0  | 0  | 0  | 0 | 0 | 0 | 0 | 0 | 0 |
| 0                                                                                                          | 0 | 0 | 0  | 0  | 0  | 0  | 0 | 0 | 0 | 0 | 0 | 0 |
| 0                                                                                                          | 0 | 0 | 0  | 0  | 0  | 0  | 0 | 0 | 0 | 0 | 0 | 0 |
| 0                                                                                                          | 0 | 0 | 0  | 0  | 0  | 0  | 0 | 0 | 0 | 0 | 0 | 0 |
| 0                                                                                                          | 0 | 0 | 0  | 0  | 0  | 0  | 0 | 0 | 0 | 0 | 0 | 0 |
| 0                                                                                                          | 0 | 0 | 0  | 0  | 0  | 0  | 0 |   |   |   |   |   |
| "Viruses;Uroviricota;Caudoviricetes;Caudoviricetes__na;Caudoviricetes__na;Caudoviricetes__na;Rhodoferrax_p | 1 | 1 | 6  | 11 | 13 | 36 | 0 | 0 | 0 | 0 | 0 | 0 |
| hage_P26218"                                                                                               | 0 | 0 | 0  | 1  | 0  | 0  | 0 | 0 | 0 | 0 | 0 | 0 |
| 0                                                                                                          | 0 | 0 | 0  | 0  | 0  | 0  | 0 | 1 | 0 | 0 | 0 | 0 |
| 0                                                                                                          | 0 | 0 | 54 | 0  | 0  | 0  | 0 | 0 | 0 | 0 | 0 | 0 |
| 0                                                                                                          | 0 | 0 | 0  | 0  | 0  | 0  | 0 | 0 | 0 | 0 | 0 | 0 |
| 0                                                                                                          | 0 | 0 | 0  | 0  | 0  | 0  | 0 |   |   |   |   |   |
| "Viruses;Uroviricota;Caudoviricetes;Caudoviricetes__na;Caudoviricetes__na;Caudoviricetes__na;Roseobacter_p | 0 | 0 | 1  | 3  | 9  | 1  | 0 | 0 | 0 | 0 | 0 | 0 |
| hage_CRP-1"                                                                                                | 0 | 0 | 0  | 0  | 0  | 0  | 0 | 0 | 0 | 0 | 0 | 0 |
| 0                                                                                                          | 0 | 0 | 0  | 0  | 0  | 0  | 0 | 0 | 0 | 0 | 0 | 0 |
| 0                                                                                                          | 0 | 0 | 0  | 0  | 0  | 0  | 0 | 0 | 0 | 0 | 0 | 0 |
| 0                                                                                                          | 0 | 0 | 3  | 0  | 0  | 0  | 0 | 0 | 2 | 0 | 0 | 0 |
| 0                                                                                                          | 0 | 0 | 0  | 0  | 0  | 0  | 0 | 0 | 0 | 0 | 0 | 0 |
| 0                                                                                                          | 0 | 0 | 0  | 0  | 0  | 0  | 0 |   |   |   |   |   |
| "Viruses;Uroviricota;Caudoviricetes;Caudoviricetes__na;Caudoviricetes__na;Caudoviricetes__na;Roseobacter_p | 0 | 0 | 0  | 0  | 11 | 4  | 0 | 0 | 0 | 0 | 0 | 0 |
| hage_CRP-13"                                                                                               | 0 | 0 | 0  | 0  | 0  | 0  | 0 | 0 | 0 | 0 | 1 | 0 |
| 0                                                                                                          | 0 | 0 | 0  | 0  | 0  | 0  | 0 | 0 | 0 | 0 | 0 | 0 |
| 0                                                                                                          | 0 | 0 | 0  | 0  | 0  | 0  | 0 | 0 | 0 | 0 | 0 | 0 |
| 0                                                                                                          | 0 | 0 | 0  | 0  | 0  | 0  | 0 | 0 | 0 | 0 | 0 | 0 |
| 0                                                                                                          | 0 | 0 | 0  | 0  | 0  | 0  | 0 | 0 | 0 | 0 | 0 | 0 |
| 0                                                                                                          | 0 | 0 | 0  | 0  | 0  | 2  | 0 |   |   |   |   |   |
| "Viruses;Uroviricota;Caudoviricetes;Caudoviricetes__na;Caudoviricetes__na;Caudoviricetes__na;Roseobacter_p | 1 | 0 | 0  | 0  | 54 | 3  | 0 | 0 | 0 | 0 | 0 | 0 |
| hage_CRP-2"                                                                                                | 0 | 0 | 0  | 0  | 0  | 0  | 0 | 0 | 0 | 0 | 0 | 0 |
| 0                                                                                                          | 0 | 0 | 0  | 0  | 0  | 0  | 0 | 0 | 0 | 0 | 0 | 0 |
| 0                                                                                                          | 0 | 0 | 0  | 0  | 0  | 0  | 0 | 0 | 0 | 0 | 0 | 0 |
| 0                                                                                                          | 0 | 0 | 0  | 0  | 0  | 0  | 0 | 0 | 0 | 0 | 0 | 0 |
| 0                                                                                                          | 0 | 0 | 0  | 0  | 0  | 0  | 0 | 0 | 0 | 0 | 0 | 0 |
| 0                                                                                                          | 0 | 0 | 0  | 0  | 0  | 0  | 0 |   |   |   |   |   |
| "Viruses;Uroviricota;Caudoviricetes;Caudoviricetes__na;Caudoviricetes__na;Caudoviricetes__na;Roseobacter_p | 0 | 0 | 1  | 0  | 0  | 12 | 0 | 0 | 0 | 0 | 0 | 0 |
| hage_CRP-207"                                                                                              | 0 | 0 | 0  | 0  | 0  | 0  | 0 | 0 | 0 | 0 | 0 | 0 |
| 0                                                                                                          | 0 | 0 | 0  | 0  | 0  | 0  | 0 | 0 | 0 | 0 | 0 | 0 |
| 0                                                                                                          | 0 | 0 | 0  | 0  | 0  | 0  | 0 | 0 | 0 | 0 | 0 | 0 |
| 0                                                                                                          | 0 | 0 | 0  | 0  | 0  | 0  | 1 | 0 | 0 | 0 | 0 | 0 |

|                                                                                                            |   |   |   |   |    |    |   |   |   |   |   |   |
|------------------------------------------------------------------------------------------------------------|---|---|---|---|----|----|---|---|---|---|---|---|
|                                                                                                            | 0 | 0 | 0 | 0 | 0  | 0  | 0 | 0 | 0 | 0 | 0 | 0 |
|                                                                                                            | 0 | 0 | 0 | 0 | 0  | 0  | 2 | 0 |   |   |   |   |
| "Viruses;Uroviricota;Caudoviricetes;Caudoviricetes__na;Caudoviricetes__na;Caudoviricetes__na;Roseobacter_p |   |   |   |   |    |    |   |   |   |   |   |   |
| hage_CRP-212"                                                                                              | 0 | 0 | 0 | 4 | 5  | 0  | 0 | 0 | 0 | 0 | 0 | 0 |
|                                                                                                            | 0 | 0 | 0 | 0 | 0  | 0  | 0 | 0 | 0 | 0 | 0 | 0 |
|                                                                                                            | 0 | 0 | 0 | 0 | 0  | 0  | 0 | 0 | 0 | 0 | 0 | 0 |
|                                                                                                            | 0 | 0 | 0 | 0 | 0  | 0  | 0 | 0 | 2 | 0 | 0 | 0 |
|                                                                                                            | 0 | 0 | 0 | 0 | 0  | 0  | 0 | 0 | 0 | 0 | 0 | 0 |
|                                                                                                            | 0 | 0 | 0 | 0 | 0  | 1  | 0 |   |   |   |   |   |
| "Viruses;Uroviricota;Caudoviricetes;Caudoviricetes__na;Caudoviricetes__na;Caudoviricetes__na;Roseobacter_p |   |   |   |   |    |    |   |   |   |   |   |   |
| hage_CRP-235"                                                                                              | 0 | 0 | 1 | 1 | 0  | 0  | 0 | 0 | 0 | 0 | 0 | 0 |
|                                                                                                            | 0 | 0 | 0 | 0 | 0  | 0  | 0 | 0 | 0 | 0 | 0 | 0 |
|                                                                                                            | 0 | 0 | 0 | 0 | 0  | 0  | 0 | 0 | 0 | 0 | 0 | 0 |
|                                                                                                            | 0 | 0 | 0 | 0 | 0  | 0  | 0 | 0 | 1 | 0 | 0 | 0 |
|                                                                                                            | 0 | 0 | 0 | 0 | 0  | 0  | 0 | 0 | 0 | 0 | 0 | 0 |
|                                                                                                            | 0 | 0 | 0 | 0 | 0  | 0  | 0 |   |   |   |   |   |
| "Viruses;Uroviricota;Caudoviricetes;Caudoviricetes__na;Caudoviricetes__na;Caudoviricetes__na;Roseobacter_p |   |   |   |   |    |    |   |   |   |   |   |   |
| hage_CRP-3"                                                                                                | 0 | 3 | 0 | 0 | 4  | 4  | 0 | 0 | 0 | 0 | 0 | 0 |
|                                                                                                            | 0 | 0 | 0 | 0 | 0  | 0  | 0 | 0 | 0 | 0 | 0 | 0 |
|                                                                                                            | 0 | 0 | 0 | 0 | 0  | 0  | 0 | 0 | 0 | 0 | 0 | 0 |
|                                                                                                            | 0 | 0 | 0 | 0 | 0  | 0  | 0 | 0 | 0 | 0 | 0 | 0 |
|                                                                                                            | 0 | 0 | 0 | 0 | 0  | 0  | 0 | 0 | 0 | 0 | 0 | 0 |
|                                                                                                            | 0 | 0 | 0 | 0 | 0  | 0  | 0 |   |   |   |   |   |
| "Viruses;Uroviricota;Caudoviricetes;Caudoviricetes__na;Caudoviricetes__na;Caudoviricetes__na;Roseobacter_p |   |   |   |   |    |    |   |   |   |   |   |   |
| hage_CRP-345"                                                                                              | 0 | 0 | 0 | 0 | 0  | 19 | 0 | 0 | 0 | 0 | 0 | 0 |
|                                                                                                            | 0 | 0 | 0 | 0 | 0  | 0  | 0 | 0 | 0 | 0 | 0 | 0 |
|                                                                                                            | 0 | 0 | 0 | 0 | 0  | 0  | 0 | 0 | 0 | 0 | 0 | 0 |
|                                                                                                            | 0 | 0 | 0 | 0 | 0  | 0  | 0 | 0 | 0 | 0 | 0 | 0 |
|                                                                                                            | 0 | 0 | 0 | 0 | 0  | 0  | 0 | 0 | 0 | 0 | 0 | 0 |
|                                                                                                            | 0 | 0 | 0 | 0 | 0  | 0  | 0 |   |   |   |   |   |
| "Viruses;Uroviricota;Caudoviricetes;Caudoviricetes__na;Caudoviricetes__na;Caudoviricetes__na;Roseobacter_p |   |   |   |   |    |    |   |   |   |   |   |   |
| hage_CRP-6"                                                                                                | 0 | 0 | 0 | 1 | 4  | 4  | 0 | 0 | 0 | 0 | 0 | 0 |
|                                                                                                            | 0 | 0 | 0 | 0 | 1  | 0  | 0 | 0 | 0 | 0 | 1 | 0 |
|                                                                                                            | 0 | 0 | 0 | 0 | 0  | 0  | 0 | 0 | 1 | 0 | 0 | 0 |
|                                                                                                            | 0 | 0 | 0 | 0 | 0  | 0  | 0 | 0 | 0 | 0 | 0 | 0 |
|                                                                                                            | 0 | 0 | 0 | 0 | 0  | 0  | 0 | 0 | 0 | 0 | 0 | 0 |
|                                                                                                            | 0 | 0 | 0 | 0 | 0  | 0  | 0 |   |   |   |   |   |
| "Viruses;Uroviricota;Caudoviricetes;Caudoviricetes__na;Caudoviricetes__na;Caudoviricetes__na;Roseobacter_p |   |   |   |   |    |    |   |   |   |   |   |   |
| hage_CRP-603"                                                                                              | 0 | 0 | 1 | 0 | 71 | 0  | 0 | 0 | 0 | 0 | 0 | 0 |
|                                                                                                            | 0 | 0 | 0 | 0 | 0  | 0  | 0 | 0 | 0 | 0 | 0 | 0 |
|                                                                                                            | 0 | 0 | 0 | 0 | 0  | 0  | 0 | 0 | 0 | 0 | 0 | 0 |
|                                                                                                            | 0 | 0 | 0 | 0 | 0  | 0  | 0 | 0 | 2 | 0 | 0 | 0 |
|                                                                                                            | 0 | 0 | 0 | 0 | 0  | 0  | 0 | 0 | 0 | 0 | 0 | 0 |
|                                                                                                            | 0 | 0 | 0 | 0 | 0  | 0  | 0 |   |   |   |   |   |
| "Viruses;Uroviricota;Caudoviricetes;Caudoviricetes__na;Caudoviricetes__na;Caudoviricetes__na;Roseobacter_p |   |   |   |   |    |    |   |   |   |   |   |   |
| hage_CRP-7"                                                                                                | 0 | 0 | 0 | 0 | 0  | 5  | 0 | 0 | 0 | 0 | 0 | 0 |
|                                                                                                            | 0 | 0 | 0 | 0 | 0  | 0  | 0 | 0 | 0 | 0 | 0 | 0 |
|                                                                                                            | 0 | 0 | 0 | 0 | 0  | 0  | 0 | 0 | 0 | 0 | 0 | 0 |
|                                                                                                            | 0 | 0 | 0 | 0 | 0  | 0  | 0 | 0 | 3 | 0 | 0 | 0 |

|                                                                                                            |   |   |   |   |    |   |   |    |   |   |   |   |
|------------------------------------------------------------------------------------------------------------|---|---|---|---|----|---|---|----|---|---|---|---|
| 0                                                                                                          | 0 | 0 | 0 | 0 | 0  | 0 | 0 | 0  | 0 | 0 | 0 | 0 |
| 0                                                                                                          | 0 | 0 | 0 | 0 | 0  | 1 | 0 |    |   |   |   |   |
| "Viruses;Uroviricota;Caudoviricetes;Caudoviricetes__na;Caudoviricetes__na;Caudoviricetes__na;Roseobacter_p |   |   |   |   |    |   |   |    |   |   |   |   |
| hage_CRP-738"                                                                                              | 0 | 0 | 0 | 1 | 13 | 2 | 0 | 0  | 0 | 0 | 0 | 0 |
| 0                                                                                                          | 0 | 0 | 0 | 0 | 0  | 0 | 0 | 0  | 0 | 0 | 1 | 0 |
| 0                                                                                                          | 0 | 0 | 0 | 0 | 0  | 0 | 0 | 0  | 0 | 0 | 0 | 0 |
| 0                                                                                                          | 0 | 0 | 0 | 0 | 0  | 0 | 0 | 0  | 0 | 0 | 0 | 0 |
| 0                                                                                                          | 0 | 0 | 0 | 0 | 0  | 0 | 0 | 0  | 0 | 0 | 0 | 0 |
| 0                                                                                                          | 0 | 0 | 0 | 0 | 0  | 0 | 0 | 0  | 0 | 0 | 0 | 0 |
| 0                                                                                                          | 0 | 0 | 0 | 0 | 0  | 0 | 0 |    |   |   |   |   |
| "Viruses;Uroviricota;Caudoviricetes;Caudoviricetes__na;Caudoviricetes__na;Caudoviricetes__na;Roseobacter_p |   |   |   |   |    |   |   |    |   |   |   |   |
| hage_CRP-9"                                                                                                | 2 | 0 | 0 | 5 | 22 | 4 | 0 | 0  | 0 | 0 | 0 | 0 |
| 0                                                                                                          | 0 | 0 | 0 | 0 | 0  | 0 | 0 | 0  | 0 | 0 | 0 | 0 |
| 0                                                                                                          | 0 | 0 | 0 | 0 | 0  | 0 | 0 | 0  | 0 | 0 | 0 | 0 |
| 0                                                                                                          | 0 | 0 | 0 | 0 | 0  | 0 | 0 | 0  | 0 | 0 | 0 | 0 |
| 0                                                                                                          | 0 | 0 | 0 | 0 | 0  | 0 | 0 | 0  | 0 | 0 | 0 | 0 |
| 0                                                                                                          | 0 | 0 | 0 | 0 | 0  | 3 | 0 |    |   |   |   |   |
| "Viruses;Uroviricota;Caudoviricetes;Caudoviricetes__na;Caudoviricetes__na;Caudoviricetes__na;Roseobacter_p |   |   |   |   |    |   |   |    |   |   |   |   |
| hage_CRP-901"                                                                                              | 0 | 0 | 0 | 0 | 1  | 0 | 0 | 0  | 0 | 0 | 0 | 0 |
| 0                                                                                                          | 0 | 0 | 0 | 0 | 0  | 0 | 0 | 0  | 0 | 0 | 0 | 0 |
| 0                                                                                                          | 0 | 0 | 0 | 0 | 0  | 0 | 0 | 0  | 0 | 0 | 0 | 0 |
| 0                                                                                                          | 0 | 0 | 0 | 0 | 0  | 0 | 0 | 0  | 0 | 0 | 0 | 0 |
| 0                                                                                                          | 0 | 0 | 0 | 0 | 0  | 0 | 0 | 0  | 0 | 0 | 0 | 0 |
| 0                                                                                                          | 0 | 0 | 0 | 0 | 0  | 0 | 0 |    |   |   |   |   |
| "Viruses;Uroviricota;Caudoviricetes;Caudoviricetes__na;Caudoviricetes__na;Caudoviricetes__na;Roseobacter_p |   |   |   |   |    |   |   |    |   |   |   |   |
| hage_CRP-902"                                                                                              | 0 | 0 | 0 | 1 | 0  | 0 | 0 | 0  | 0 | 0 | 0 | 0 |
| 0                                                                                                          | 0 | 0 | 0 | 0 | 0  | 0 | 0 | 0  | 0 | 0 | 0 | 0 |
| 0                                                                                                          | 0 | 0 | 0 | 0 | 0  | 0 | 0 | 0  | 0 | 0 | 0 | 0 |
| 0                                                                                                          | 0 | 0 | 0 | 0 | 0  | 0 | 0 | 0  | 0 | 0 | 0 | 0 |
| 0                                                                                                          | 0 | 1 | 0 | 0 | 0  | 0 | 0 | 0  | 0 | 0 | 0 | 0 |
| 0                                                                                                          | 0 | 0 | 0 | 0 | 0  | 0 | 0 |    |   |   |   |   |
| "Viruses;Uroviricota;Caudoviricetes;Caudoviricetes__na;Caudoviricetes__na;Caudoviricetes__na;Roseobacter_p |   |   |   |   |    |   |   |    |   |   |   |   |
| hage_RDJL3"                                                                                                | 0 | 0 | 0 | 0 | 0  | 0 | 0 | 0  | 0 | 0 | 0 | 0 |
| 0                                                                                                          | 0 | 0 | 0 | 0 | 0  | 0 | 0 | 0  | 0 | 0 | 0 | 0 |
| 0                                                                                                          | 0 | 0 | 0 | 0 | 0  | 0 | 0 | 0  | 0 | 0 | 0 | 0 |
| 0                                                                                                          | 0 | 0 | 0 | 0 | 0  | 0 | 0 | 27 | 0 | 0 | 0 | 0 |
| 0                                                                                                          | 0 | 0 | 0 | 0 | 0  | 0 | 0 | 0  | 0 | 0 | 0 | 0 |
| 0                                                                                                          | 0 | 0 | 0 | 0 | 0  | 0 | 0 |    |   |   |   |   |
| "Viruses;Uroviricota;Caudoviricetes;Caudoviricetes__na;Caudoviricetes__na;Caudoviricetes__na;Ruminococcus  |   |   |   |   |    |   |   |    |   |   |   |   |
| _phage_phiRg519T2"                                                                                         | 0 | 0 | 0 | 0 | 0  | 0 | 0 | 0  | 0 | 0 | 0 | 0 |
| 0                                                                                                          | 0 | 0 | 0 | 0 | 0  | 0 | 0 | 0  | 0 | 0 | 0 | 0 |
| 0                                                                                                          | 0 | 0 | 0 | 0 | 0  | 0 | 0 | 0  | 0 | 0 | 0 | 0 |
| 0                                                                                                          | 0 | 0 | 0 | 0 | 0  | 0 | 1 | 0  | 0 | 0 | 0 | 0 |
| 0                                                                                                          | 0 | 0 | 0 | 0 | 0  | 0 | 0 | 0  | 0 | 0 | 0 | 0 |
| 0                                                                                                          | 0 | 0 | 0 | 0 | 0  | 0 | 0 | 0  |   |   |   |   |
| "Viruses;Uroviricota;Caudoviricetes;Caudoviricetes__na;Caudoviricetes__na;Caudoviricetes__na;Ruminococcus  |   |   |   |   |    |   |   |    |   |   |   |   |
| _phage_phiRM10"                                                                                            | 0 | 0 | 0 | 0 | 0  | 0 | 0 | 0  | 0 | 0 | 0 | 0 |
| 0                                                                                                          | 0 | 0 | 0 | 0 | 0  | 0 | 0 | 0  | 0 | 0 | 0 | 0 |
| 0                                                                                                          | 0 | 0 | 0 | 0 | 0  | 0 | 0 | 0  | 0 | 0 | 0 | 0 |
| 0                                                                                                          | 0 | 0 | 0 | 5 | 0  | 0 | 0 | 0  | 0 | 0 | 0 | 0 |

[illegible]



[illegible]

[illegible]

|                                                                                                             |   |   |   |    |   |   |   |   |   |   |   |   |
|-------------------------------------------------------------------------------------------------------------|---|---|---|----|---|---|---|---|---|---|---|---|
|                                                                                                             | 0 | 0 | 0 | 0  | 0 | 0 | 0 | 0 | 0 | 0 | 0 | 0 |
|                                                                                                             | 0 | 0 | 2 | 0  | 0 | 0 | 0 | 0 |   |   |   |   |
| "Viruses;Uroviricota;Caudoviricetes;Caudoviricetes__na;Caudoviricetes__na;Caudoviricetes__na;Siphoviridae_s |   |   |   |    |   |   |   |   |   |   |   |   |
| p._ct1yA16"                                                                                                 | 0 | 0 | 0 | 0  | 0 | 0 | 0 | 0 | 0 | 0 | 0 | 0 |
|                                                                                                             | 0 | 1 | 0 | 0  | 0 | 0 | 0 | 0 | 0 | 0 | 0 | 0 |
|                                                                                                             | 0 | 0 | 0 | 0  | 0 | 0 | 0 | 0 | 0 | 0 | 0 | 1 |
|                                                                                                             | 0 | 0 | 0 | 0  | 0 | 0 | 0 | 0 | 0 | 0 | 0 | 0 |
|                                                                                                             | 0 | 0 | 0 | 2  | 1 | 0 | 0 | 0 | 0 | 0 | 0 | 0 |
|                                                                                                             | 0 | 0 | 0 | 0  | 0 | 0 | 0 | 0 |   |   |   |   |
| "Viruses;Uroviricota;Caudoviricetes;Caudoviricetes__na;Caudoviricetes__na;Caudoviricetes__na;Siphoviridae_s |   |   |   |    |   |   |   |   |   |   |   |   |
| p._ct1Zj2"                                                                                                  | 0 | 0 | 0 | 0  | 0 | 0 | 0 | 0 | 0 | 0 | 0 | 0 |
|                                                                                                             | 0 | 0 | 0 | 0  | 0 | 0 | 0 | 0 | 0 | 0 | 0 | 0 |
|                                                                                                             | 0 | 0 | 0 | 0  | 0 | 0 | 0 | 0 | 0 | 0 | 0 | 0 |
|                                                                                                             | 0 | 0 | 0 | 0  | 0 | 0 | 0 | 0 | 0 | 0 | 0 | 0 |
|                                                                                                             | 0 | 0 | 0 | 2  | 0 | 0 | 0 | 0 | 0 | 0 | 0 | 0 |
|                                                                                                             | 0 | 0 | 0 | 0  | 0 | 0 | 0 | 0 |   |   |   |   |
| "Viruses;Uroviricota;Caudoviricetes;Caudoviricetes__na;Caudoviricetes__na;Caudoviricetes__na;Siphoviridae_s |   |   |   |    |   |   |   |   |   |   |   |   |
| p._ct2hZ16"                                                                                                 | 0 | 0 | 0 | 0  | 0 | 0 | 0 | 0 | 0 | 0 | 0 | 0 |
|                                                                                                             | 1 | 1 | 0 | 0  | 0 | 0 | 0 | 0 | 0 | 0 | 0 | 0 |
|                                                                                                             | 0 | 0 | 0 | 0  | 0 | 0 | 0 | 0 | 0 | 0 | 0 | 0 |
|                                                                                                             | 0 | 0 | 0 | 0  | 0 | 0 | 0 | 0 | 0 | 0 | 0 | 0 |
|                                                                                                             | 0 | 0 | 0 | 0  | 0 | 0 | 0 | 0 | 0 | 0 | 0 | 0 |
|                                                                                                             | 0 | 0 | 0 | 0  | 0 | 0 | 0 | 0 | 0 | 0 | 0 | 0 |
| "Viruses;Uroviricota;Caudoviricetes;Caudoviricetes__na;Caudoviricetes__na;Caudoviricetes__na;Siphoviridae_s |   |   |   |    |   |   |   |   |   |   |   |   |
| p._ct2QJ10"                                                                                                 | 0 | 0 | 0 | 0  | 0 | 0 | 0 | 0 | 0 | 0 | 0 | 0 |
|                                                                                                             | 0 | 0 | 0 | 0  | 0 | 0 | 0 | 0 | 0 | 0 | 0 | 0 |
|                                                                                                             | 0 | 0 | 0 | 0  | 0 | 0 | 0 | 0 | 0 | 0 | 0 | 0 |
|                                                                                                             | 0 | 0 | 0 | 0  | 0 | 0 | 0 | 0 | 0 | 0 | 0 | 0 |
|                                                                                                             | 0 | 0 | 0 | 0  | 0 | 0 | 0 | 0 | 0 | 0 | 0 | 0 |
|                                                                                                             | 0 | 0 | 0 | 2  | 0 | 0 | 0 | 0 |   |   |   |   |
| "Viruses;Uroviricota;Caudoviricetes;Caudoviricetes__na;Caudoviricetes__na;Caudoviricetes__na;Siphoviridae_s |   |   |   |    |   |   |   |   |   |   |   |   |
| p._ct2vX3"                                                                                                  | 0 | 0 | 0 | 0  | 0 | 0 | 0 | 0 | 0 | 0 | 0 | 0 |
|                                                                                                             | 0 | 0 | 0 | 0  | 0 | 0 | 1 | 0 | 0 | 0 | 0 | 0 |
|                                                                                                             | 0 | 0 | 0 | 0  | 0 | 0 | 0 | 0 | 0 | 0 | 0 | 0 |
|                                                                                                             | 0 | 0 | 0 | 0  | 0 | 0 | 0 | 0 | 0 | 0 | 0 | 0 |
|                                                                                                             | 0 | 0 | 0 | 0  | 0 | 0 | 0 | 0 | 0 | 0 | 0 | 0 |
|                                                                                                             | 0 | 0 | 1 | 0  | 0 | 0 | 0 | 0 |   |   |   |   |
| "Viruses;Uroviricota;Caudoviricetes;Caudoviricetes__na;Caudoviricetes__na;Caudoviricetes__na;Siphoviridae_s |   |   |   |    |   |   |   |   |   |   |   |   |
| p._ct39g3"                                                                                                  | 0 | 0 | 0 | 0  | 0 | 0 | 0 | 0 | 0 | 0 | 0 | 0 |
|                                                                                                             | 0 | 0 | 0 | 0  | 0 | 0 | 0 | 0 | 0 | 0 | 0 | 0 |
|                                                                                                             | 0 | 0 | 0 | 0  | 0 | 0 | 0 | 0 | 0 | 0 | 1 | 1 |
|                                                                                                             | 0 | 0 | 0 | 0  | 0 | 0 | 0 | 0 | 0 | 0 | 0 | 0 |
|                                                                                                             | 0 | 0 | 0 | 0  | 0 | 0 | 0 | 0 | 0 | 0 | 0 | 0 |
|                                                                                                             | 0 | 0 | 0 | 1  | 0 | 0 | 0 | 0 |   |   |   |   |
| "Viruses;Uroviricota;Caudoviricetes;Caudoviricetes__na;Caudoviricetes__na;Caudoviricetes__na;Siphoviridae_s |   |   |   |    |   |   |   |   |   |   |   |   |
| p._ct3an14"                                                                                                 | 0 | 0 | 0 | 0  | 0 | 0 | 0 | 0 | 0 | 0 | 0 | 0 |
|                                                                                                             | 0 | 0 | 0 | 0  | 0 | 0 | 0 | 0 | 0 | 0 | 0 | 0 |
|                                                                                                             | 0 | 0 | 0 | 0  | 0 | 0 | 0 | 0 | 0 | 0 | 0 | 0 |
|                                                                                                             | 0 | 0 | 0 | 11 | 0 | 0 | 0 | 0 | 0 | 0 | 0 | 0 |



[illegible]

|                                                                                                             |   |   |   |    |    |   |   |   |   |   |   |    |    |
|-------------------------------------------------------------------------------------------------------------|---|---|---|----|----|---|---|---|---|---|---|----|----|
|                                                                                                             | 0 | 0 | 0 | 0  | 1  | 0 | 0 | 0 | 0 | 0 | 0 | 0  | 0  |
|                                                                                                             | 0 | 0 | 0 | 0  | 0  | 0 | 0 | 0 |   |   |   |    |    |
| "Viruses;Uroviricota;Caudoviricetes;Caudoviricetes__na;Caudoviricetes__na;Caudoviricetes__na;Siphoviridae_s |   |   |   |    |    |   |   |   |   |   |   |    |    |
| p._ct47y1"                                                                                                  | 0 | 0 | 0 | 0  | 0  | 0 | 0 | 0 | 0 | 0 | 0 | 0  | 0  |
|                                                                                                             | 0 | 0 | 0 | 0  | 0  | 0 | 1 | 4 | 0 | 0 | 0 | 0  | 0  |
|                                                                                                             | 0 | 0 | 0 | 0  | 0  | 0 | 0 | 0 | 0 | 0 | 0 | 1  | 2  |
|                                                                                                             | 0 | 0 | 0 | 0  | 13 | 4 | 8 | 0 | 0 | 0 | 0 | 0  | 0  |
|                                                                                                             | 0 | 0 | 0 | 0  | 0  | 0 | 0 | 0 | 0 | 0 | 0 | 0  | 0  |
|                                                                                                             | 0 | 0 | 4 | 1  | 0  | 0 | 0 | 0 |   |   |   |    |    |
| "Viruses;Uroviricota;Caudoviricetes;Caudoviricetes__na;Caudoviricetes__na;Caudoviricetes__na;Siphoviridae_s |   |   |   |    |    |   |   |   |   |   |   |    |    |
| p._ct4aE30"                                                                                                 | 0 | 0 | 0 | 0  | 0  | 0 | 0 | 0 | 0 | 0 | 0 | 0  | 0  |
|                                                                                                             | 1 | 0 | 0 | 0  | 0  | 0 | 1 | 2 | 0 | 0 | 0 | 0  | 0  |
|                                                                                                             | 0 | 0 | 0 | 0  | 0  | 0 | 0 | 0 | 0 | 0 | 0 | 0  | 0  |
|                                                                                                             | 0 | 0 | 0 | 0  | 0  | 0 | 0 | 0 | 0 | 0 | 0 | 0  | 0  |
|                                                                                                             | 0 | 0 | 0 | 0  | 1  | 0 | 0 | 0 | 0 | 0 | 0 | 0  | 0  |
|                                                                                                             | 0 | 0 | 0 | 1  | 0  | 0 | 0 | 0 |   |   |   |    |    |
| "Viruses;Uroviricota;Caudoviricetes;Caudoviricetes__na;Caudoviricetes__na;Caudoviricetes__na;Siphoviridae_s |   |   |   |    |    |   |   |   |   |   |   |    |    |
| p._ct4Am4"                                                                                                  | 0 | 0 | 0 | 0  | 0  | 0 | 0 | 0 | 0 | 0 | 0 | 0  | 0  |
|                                                                                                             | 0 | 0 | 0 | 0  | 0  | 0 | 0 | 0 | 0 | 0 | 0 | 0  | 0  |
|                                                                                                             | 0 | 0 | 0 | 0  | 0  | 1 | 5 | 0 | 0 | 0 | 0 | 24 | 19 |
|                                                                                                             | 1 | 2 | 0 | 23 | 0  | 0 | 0 | 0 | 0 | 0 | 0 | 0  | 0  |
|                                                                                                             | 0 | 3 | 0 | 0  | 0  | 0 | 0 | 0 | 0 | 0 | 0 | 0  | 0  |
|                                                                                                             | 0 | 0 | 1 | 0  | 0  | 0 | 0 | 0 |   |   |   |    |    |
| "Viruses;Uroviricota;Caudoviricetes;Caudoviricetes__na;Caudoviricetes__na;Caudoviricetes__na;Siphoviridae_s |   |   |   |    |    |   |   |   |   |   |   |    |    |
| p._ct4be24"                                                                                                 | 0 | 0 | 0 | 0  | 0  | 0 | 0 | 0 | 0 | 0 | 0 | 0  | 0  |
|                                                                                                             | 0 | 0 | 0 | 0  | 0  | 0 | 0 | 0 | 0 | 0 | 0 | 0  | 0  |
|                                                                                                             | 0 | 0 | 0 | 0  | 0  | 0 | 1 | 0 | 0 | 0 | 0 | 0  | 1  |
|                                                                                                             | 0 | 0 | 0 | 0  | 0  | 0 | 0 | 0 | 0 | 0 | 0 | 0  | 0  |
|                                                                                                             | 0 | 0 | 0 | 0  | 0  | 0 | 0 | 0 | 0 | 0 | 0 | 0  | 0  |
|                                                                                                             | 0 | 0 | 3 | 2  | 0  | 0 | 0 | 0 |   |   |   |    |    |
| "Viruses;Uroviricota;Caudoviricetes;Caudoviricetes__na;Caudoviricetes__na;Caudoviricetes__na;Siphoviridae_s |   |   |   |    |    |   |   |   |   |   |   |    |    |
| p._ct4T77"                                                                                                  | 0 | 0 | 0 | 0  | 0  | 0 | 0 | 0 | 0 | 0 | 0 | 0  | 0  |
|                                                                                                             | 0 | 0 | 0 | 0  | 0  | 0 | 0 | 0 | 0 | 0 | 0 | 0  | 0  |
|                                                                                                             | 0 | 0 | 0 | 0  | 0  | 0 | 0 | 0 | 0 | 0 | 5 | 0  | 0  |
|                                                                                                             | 0 | 0 | 0 | 0  | 0  | 0 | 0 | 0 | 0 | 0 | 0 | 0  | 0  |
|                                                                                                             | 0 | 0 | 0 | 0  | 0  | 0 | 0 | 0 | 0 | 0 | 0 | 0  | 0  |
|                                                                                                             | 0 | 0 | 0 | 0  | 0  | 0 | 0 | 0 |   |   |   |    |    |
| "Viruses;Uroviricota;Caudoviricetes;Caudoviricetes__na;Caudoviricetes__na;Caudoviricetes__na;Siphoviridae_s |   |   |   |    |    |   |   |   |   |   |   |    |    |
| p._ct4Uy2"                                                                                                  | 0 | 0 | 0 | 0  | 0  | 0 | 0 | 0 | 0 | 0 | 0 | 0  | 0  |
|                                                                                                             | 0 | 0 | 0 | 0  | 0  | 0 | 0 | 0 | 0 | 0 | 0 | 0  | 0  |
|                                                                                                             | 0 | 0 | 0 | 0  | 0  | 0 | 0 | 0 | 0 | 0 | 0 | 0  | 1  |
|                                                                                                             | 0 | 0 | 0 | 0  | 0  | 0 | 0 | 0 | 0 | 0 | 0 | 0  | 0  |
|                                                                                                             | 0 | 0 | 0 | 0  | 0  | 0 | 0 | 0 | 0 | 0 | 0 | 0  | 0  |
|                                                                                                             | 0 | 0 | 0 | 0  | 0  | 0 | 0 | 0 |   |   |   |    |    |
| "Viruses;Uroviricota;Caudoviricetes;Caudoviricetes__na;Caudoviricetes__na;Caudoviricetes__na;Siphoviridae_s |   |   |   |    |    |   |   |   |   |   |   |    |    |
| p._ct4Z13"                                                                                                  | 0 | 0 | 0 | 0  | 0  | 0 | 0 | 0 | 0 | 0 | 0 | 0  | 0  |
|                                                                                                             | 0 | 0 | 0 | 0  | 0  | 0 | 0 | 1 | 0 | 0 | 0 | 0  | 0  |
|                                                                                                             | 0 | 0 | 0 | 0  | 0  | 0 | 0 | 0 | 0 | 0 | 0 | 0  | 2  |
|                                                                                                             | 0 | 0 | 0 | 0  | 0  | 1 | 0 | 0 | 0 | 0 | 0 | 0  | 0  |

[illegible]

[illegible]

[illegible]

[illegible]

|                                                                                                             |    |   |   |    |   |    |   |   |   |     |    |    |
|-------------------------------------------------------------------------------------------------------------|----|---|---|----|---|----|---|---|---|-----|----|----|
|                                                                                                             | 0  | 0 | 0 | 0  | 0 | 0  | 0 | 0 | 0 | 0   | 0  | 0  |
|                                                                                                             | 0  | 0 | 1 | 3  | 0 | 0  | 0 | 0 |   |     |    |    |
| "Viruses;Uroviricota;Caudoviricetes;Caudoviricetes__na;Caudoviricetes__na;Caudoviricetes__na;Siphoviridae_s |    |   |   |    |   |    |   |   |   |     |    |    |
| p_ct8LX107"                                                                                                 | 0  | 0 | 0 | 0  | 0 | 0  | 0 | 0 | 0 | 0   | 0  | 0  |
|                                                                                                             | 0  | 0 | 0 | 0  | 0 | 0  | 0 | 0 | 0 | 0   | 0  | 0  |
|                                                                                                             | 0  | 0 | 0 | 0  | 0 | 3  | 0 | 0 | 0 | 0   | 44 | 34 |
|                                                                                                             | 1  | 4 | 0 | 29 | 0 | 0  | 0 | 0 | 0 | 0   | 0  | 0  |
|                                                                                                             | 0  | 3 | 0 | 0  | 1 | 0  | 0 | 0 | 0 | 0   | 0  | 0  |
|                                                                                                             | 0  | 0 | 0 | 0  | 0 | 0  | 0 |   |   |     |    |    |
| "Viruses;Uroviricota;Caudoviricetes;Caudoviricetes__na;Caudoviricetes__na;Caudoviricetes__na;Siphoviridae_s |    |   |   |    |   |    |   |   |   |     |    |    |
| p_ct8NQ14"                                                                                                  | 0  | 0 | 0 | 0  | 0 | 0  | 0 | 0 | 0 | 0   | 0  | 0  |
|                                                                                                             | 0  | 0 | 0 | 0  | 0 | 0  | 0 | 0 | 0 | 0   | 0  | 10 |
|                                                                                                             | 12 | 1 | 0 | 3  | 0 | 2  | 0 | 2 | 0 | 583 | 0  | 3  |
|                                                                                                             | 0  | 0 | 0 | 0  | 0 | 0  | 0 | 0 | 0 | 0   | 0  | 0  |
|                                                                                                             | 0  | 0 | 0 | 0  | 0 | 0  | 0 | 0 | 0 | 0   | 0  | 0  |
|                                                                                                             | 0  | 0 | 0 | 0  | 0 | 0  | 0 |   |   |     |    |    |
| "Viruses;Uroviricota;Caudoviricetes;Caudoviricetes__na;Caudoviricetes__na;Caudoviricetes__na;Siphoviridae_s |    |   |   |    |   |    |   |   |   |     |    |    |
| p_ct8rU2"                                                                                                   | 0  | 0 | 0 | 0  | 0 | 0  | 0 | 0 | 0 | 0   | 0  | 0  |
|                                                                                                             | 0  | 1 | 0 | 0  | 0 | 0  | 0 | 0 | 0 | 0   | 0  | 0  |
|                                                                                                             | 0  | 0 | 0 | 0  | 0 | 0  | 0 | 0 | 0 | 0   | 0  | 0  |
|                                                                                                             | 0  | 0 | 0 | 0  | 0 | 0  | 0 | 0 | 0 | 0   | 0  | 0  |
|                                                                                                             | 0  | 0 | 0 | 0  | 0 | 0  | 0 | 0 | 0 | 0   | 0  | 0  |
|                                                                                                             | 0  | 0 | 0 | 0  | 0 | 0  | 0 |   |   |     |    |    |
| "Viruses;Uroviricota;Caudoviricetes;Caudoviricetes__na;Caudoviricetes__na;Caudoviricetes__na;Siphoviridae_s |    |   |   |    |   |    |   |   |   |     |    |    |
| p_ct96x5"                                                                                                   | 0  | 0 | 0 | 0  | 0 | 0  | 0 | 0 | 0 | 0   | 0  | 0  |
|                                                                                                             | 0  | 0 | 0 | 0  | 0 | 0  | 0 | 0 | 0 | 0   | 0  | 0  |
|                                                                                                             | 0  | 0 | 0 | 0  | 0 | 0  | 0 | 0 | 0 | 0   | 0  | 0  |
|                                                                                                             | 0  | 0 | 0 | 0  | 0 | 0  | 0 | 0 | 0 | 0   | 0  | 0  |
|                                                                                                             | 0  | 0 | 0 | 0  | 1 | 0  | 0 | 0 | 0 | 0   | 0  | 0  |
|                                                                                                             | 0  | 0 | 0 | 0  | 0 | 0  | 0 |   |   |     |    |    |
| "Viruses;Uroviricota;Caudoviricetes;Caudoviricetes__na;Caudoviricetes__na;Caudoviricetes__na;Siphoviridae_s |    |   |   |    |   |    |   |   |   |     |    |    |
| p_ct9lR64"                                                                                                  | 0  | 0 | 0 | 0  | 0 | 0  | 0 | 0 | 0 | 0   | 0  | 0  |
|                                                                                                             | 0  | 0 | 0 | 0  | 0 | 0  | 0 | 0 | 0 | 0   | 0  | 0  |
|                                                                                                             | 0  | 0 | 0 | 0  | 0 | 0  | 0 | 0 | 0 | 0   | 0  | 1  |
|                                                                                                             | 0  | 0 | 0 | 0  | 0 | 0  | 0 | 0 | 0 | 0   | 0  | 0  |
|                                                                                                             | 0  | 0 | 0 | 0  | 0 | 0  | 0 | 0 | 0 | 0   | 0  | 0  |
|                                                                                                             | 0  | 0 | 0 | 0  | 0 | 0  | 0 |   |   |     |    |    |
| "Viruses;Uroviricota;Caudoviricetes;Caudoviricetes__na;Caudoviricetes__na;Caudoviricetes__na;Siphoviridae_s |    |   |   |    |   |    |   |   |   |     |    |    |
| p_ct9mC1"                                                                                                   | 0  | 0 | 0 | 0  | 0 | 0  | 0 | 0 | 0 | 0   | 0  | 0  |
|                                                                                                             | 0  | 1 | 0 | 0  | 0 | 0  | 1 | 0 | 0 | 0   | 0  | 0  |
|                                                                                                             | 0  | 0 | 0 | 0  | 0 | 0  | 0 | 0 | 0 | 0   | 0  | 0  |
|                                                                                                             | 0  | 0 | 0 | 0  | 0 | 0  | 0 | 0 | 0 | 0   | 0  | 0  |
|                                                                                                             | 0  | 0 | 0 | 0  | 0 | 0  | 0 | 0 | 0 | 0   | 0  | 0  |
|                                                                                                             | 0  | 0 | 0 | 0  | 0 | 0  | 0 |   |   |     |    |    |
| "Viruses;Uroviricota;Caudoviricetes;Caudoviricetes__na;Caudoviricetes__na;Caudoviricetes__na;Siphoviridae_s |    |   |   |    |   |    |   |   |   |     |    |    |
| p_ct9Y44"                                                                                                   | 0  | 0 | 0 | 0  | 0 | 0  | 0 | 0 | 0 | 0   | 0  | 0  |
|                                                                                                             | 0  | 0 | 0 | 0  | 0 | 0  | 0 | 0 | 0 | 0   | 0  | 0  |
|                                                                                                             | 0  | 0 | 0 | 0  | 0 | 11 | 7 | 0 | 0 | 802 | 0  | 0  |
|                                                                                                             | 0  | 0 | 0 | 0  | 0 | 0  | 0 | 0 | 0 | 0   | 0  | 0  |

[illegible]



|                                                                                                             |   |   |   |   |    |   |    |    |   |     |   |   |
|-------------------------------------------------------------------------------------------------------------|---|---|---|---|----|---|----|----|---|-----|---|---|
|                                                                                                             | 0 | 0 | 0 | 0 | 0  | 0 | 0  | 0  | 1 | 0   | 0 | 0 |
|                                                                                                             | 0 | 0 | 0 | 0 | 0  | 0 | 0  |    |   |     |   |   |
| "Viruses;Uroviricota;Caudoviricetes;Caudoviricetes__na;Caudoviricetes__na;Caudoviricetes__na;Siphoviridae_s |   |   |   |   |    |   |    |    |   |     |   |   |
| p._ctAnS47"                                                                                                 | 0 | 0 | 0 | 0 | 0  | 0 | 0  | 0  | 0 | 0   | 0 | 0 |
|                                                                                                             | 0 | 0 | 0 | 1 | 1  | 2 | 0  | 0  | 0 | 0   | 0 | 0 |
|                                                                                                             | 1 | 0 | 0 | 0 | 0  | 5 | 4  | 0  | 0 | 0   | 9 | 0 |
|                                                                                                             | 0 | 0 | 0 | 0 | 0  | 0 | 0  | 0  | 0 | 0   | 0 | 0 |
|                                                                                                             | 0 | 0 | 0 | 1 | 5  | 0 | 0  | 0  | 0 | 0   | 0 | 0 |
|                                                                                                             | 0 | 0 | 0 | 0 | 0  | 0 | 0  |    |   |     |   |   |
| "Viruses;Uroviricota;Caudoviricetes;Caudoviricetes__na;Caudoviricetes__na;Caudoviricetes__na;Siphoviridae_s |   |   |   |   |    |   |    |    |   |     |   |   |
| p._ctaql5"                                                                                                  | 0 | 0 | 0 | 0 | 0  | 0 | 0  | 0  | 0 | 0   | 0 | 0 |
|                                                                                                             | 0 | 0 | 0 | 0 | 0  | 0 | 0  | 0  | 0 | 0   | 0 | 0 |
|                                                                                                             | 0 | 0 | 0 | 0 | 0  | 2 | 8  | 6  | 3 | 616 | 2 | 0 |
|                                                                                                             | 0 | 0 | 0 | 0 | 0  | 0 | 0  | 0  | 0 | 0   | 0 | 0 |
|                                                                                                             | 0 | 0 | 0 | 0 | 0  | 0 | 0  | 0  | 0 | 0   | 0 | 0 |
|                                                                                                             | 0 | 0 | 0 | 0 | 0  | 0 | 0  |    |   |     |   |   |
| "Viruses;Uroviricota;Caudoviricetes;Caudoviricetes__na;Caudoviricetes__na;Caudoviricetes__na;Siphoviridae_s |   |   |   |   |    |   |    |    |   |     |   |   |
| p._ctAUQ2"                                                                                                  | 0 | 0 | 0 | 0 | 0  | 0 | 0  | 0  | 0 | 0   | 0 | 0 |
|                                                                                                             | 1 | 1 | 1 | 2 | 0  | 3 | 15 | 30 | 0 | 0   | 2 | 0 |
|                                                                                                             | 0 | 0 | 0 | 0 | 0  | 0 | 0  | 0  | 0 | 0   | 0 | 1 |
|                                                                                                             | 0 | 0 | 0 | 0 | 13 | 3 | 1  | 0  | 0 | 0   | 0 | 0 |
|                                                                                                             | 0 | 0 | 0 | 0 | 0  | 0 | 0  | 0  | 0 | 0   | 0 | 0 |
|                                                                                                             | 0 | 0 | 0 | 0 | 0  | 0 | 0  |    |   |     |   |   |
| "Viruses;Uroviricota;Caudoviricetes;Caudoviricetes__na;Caudoviricetes__na;Caudoviricetes__na;Siphoviridae_s |   |   |   |   |    |   |    |    |   |     |   |   |
| p._ctAvy12"                                                                                                 | 0 | 0 | 0 | 0 | 0  | 0 | 0  | 0  | 0 | 0   | 0 | 0 |
|                                                                                                             | 0 | 0 | 0 | 0 | 0  | 0 | 0  | 0  | 0 | 0   | 0 | 0 |
|                                                                                                             | 0 | 0 | 0 | 0 | 0  | 0 | 0  | 0  | 0 | 0   | 3 | 1 |
|                                                                                                             | 0 | 0 | 0 | 0 | 0  | 0 | 0  | 0  | 0 | 0   | 0 | 0 |
|                                                                                                             | 0 | 0 | 0 | 0 | 0  | 0 | 0  | 0  | 1 | 0   | 1 | 0 |
|                                                                                                             | 0 | 0 | 0 | 0 | 0  | 0 | 0  |    |   |     |   |   |
| "Viruses;Uroviricota;Caudoviricetes;Caudoviricetes__na;Caudoviricetes__na;Caudoviricetes__na;Siphoviridae_s |   |   |   |   |    |   |    |    |   |     |   |   |
| p._ctb1k4"                                                                                                  | 0 | 0 | 0 | 0 | 0  | 0 | 0  | 0  | 0 | 0   | 0 | 0 |
|                                                                                                             | 0 | 3 | 0 | 0 | 0  | 0 | 1  | 0  | 0 | 0   | 0 | 2 |
|                                                                                                             | 0 | 0 | 0 | 0 | 0  | 0 | 0  | 0  | 0 | 0   | 0 | 0 |
|                                                                                                             | 0 | 0 | 0 | 0 | 0  | 0 | 0  | 0  | 0 | 0   | 0 | 0 |
|                                                                                                             | 0 | 0 | 0 | 0 | 0  | 0 | 0  | 0  | 0 | 1   | 0 | 0 |
|                                                                                                             | 0 | 0 | 0 | 1 | 0  | 0 | 0  |    |   |     |   |   |
| "Viruses;Uroviricota;Caudoviricetes;Caudoviricetes__na;Caudoviricetes__na;Caudoviricetes__na;Siphoviridae_s |   |   |   |   |    |   |    |    |   |     |   |   |
| p._ctB9E3"                                                                                                  | 0 | 0 | 0 | 0 | 0  | 0 | 0  | 0  | 0 | 0   | 0 | 0 |
|                                                                                                             | 0 | 0 | 0 | 0 | 0  | 0 | 0  | 0  | 0 | 0   | 0 | 0 |
|                                                                                                             | 0 | 0 | 0 | 0 | 0  | 0 | 0  | 0  | 0 | 0   | 0 | 0 |
|                                                                                                             | 0 | 0 | 0 | 0 | 0  | 0 | 0  | 0  | 0 | 0   | 0 | 0 |
|                                                                                                             | 0 | 0 | 0 | 0 | 0  | 0 | 0  | 0  | 0 | 0   | 0 | 0 |
|                                                                                                             | 0 | 0 | 2 | 2 | 0  | 1 | 0  |    |   |     |   |   |
| "Viruses;Uroviricota;Caudoviricetes;Caudoviricetes__na;Caudoviricetes__na;Caudoviricetes__na;Siphoviridae_s |   |   |   |   |    |   |    |    |   |     |   |   |
| p._ctB9N2"                                                                                                  | 0 | 0 | 0 | 0 | 0  | 0 | 0  | 0  | 0 | 0   | 0 | 0 |
|                                                                                                             | 0 | 0 | 0 | 0 | 0  | 0 | 0  | 0  | 0 | 0   | 0 | 0 |
|                                                                                                             | 0 | 0 | 0 | 0 | 0  | 0 | 0  | 0  | 0 | 0   | 1 | 7 |
|                                                                                                             | 0 | 0 | 0 | 8 | 0  | 0 | 0  | 0  | 0 | 0   | 0 | 0 |

[illegible]

|                                                                                                             |    |    |    |    |    |    |    |    |    |    |   |    |
|-------------------------------------------------------------------------------------------------------------|----|----|----|----|----|----|----|----|----|----|---|----|
| 0                                                                                                           | 0  | 0  | 0  | 0  | 0  | 0  | 0  | 0  | 0  | 0  | 0 | 0  |
| 0                                                                                                           | 0  | 0  | 0  | 0  | 0  | 0  | 0  |    |    |    |   |    |
| "Viruses;Uroviricota;Caudoviricetes;Caudoviricetes__na;Caudoviricetes__na;Caudoviricetes__na;Siphoviridae_s |    |    |    |    |    |    |    |    |    |    |   |    |
| p._ctc6d98"                                                                                                 | 0  | 0  | 0  | 0  | 0  | 0  | 0  | 0  | 0  | 0  | 0 | 0  |
| 0                                                                                                           | 0  | 0  | 0  | 0  | 0  | 0  | 0  | 0  | 0  | 0  | 0 | 1  |
| 0                                                                                                           | 0  | 0  | 0  | 0  | 0  | 0  | 0  | 0  | 0  | 0  | 0 | 0  |
| 0                                                                                                           | 0  | 0  | 0  | 0  | 0  | 0  | 0  | 0  | 0  | 0  | 0 | 0  |
| 0                                                                                                           | 0  | 0  | 0  | 0  | 0  | 0  | 0  | 0  | 0  | 0  | 0 | 0  |
| 0                                                                                                           | 0  | 0  | 0  | 0  | 0  | 0  | 0  | 0  | 0  | 0  | 0 | 0  |
| 0                                                                                                           | 0  | 0  | 0  | 0  | 0  | 0  | 0  |    |    |    |   |    |
| "Viruses;Uroviricota;Caudoviricetes;Caudoviricetes__na;Caudoviricetes__na;Caudoviricetes__na;Siphoviridae_s |    |    |    |    |    |    |    |    |    |    |   |    |
| p._ctCb814"                                                                                                 | 0  | 0  | 0  | 0  | 0  | 0  | 0  | 0  | 0  | 0  | 0 | 0  |
| 0                                                                                                           | 0  | 0  | 0  | 0  | 0  | 0  | 0  | 0  | 0  | 0  | 0 | 0  |
| 0                                                                                                           | 0  | 0  | 0  | 0  | 0  | 0  | 0  | 0  | 0  | 0  | 3 | 3  |
| 1                                                                                                           | 0  | 0  | 0  | 0  | 0  | 0  | 0  | 0  | 0  | 0  | 0 | 0  |
| 0                                                                                                           | 2  | 0  | 0  | 0  | 0  | 0  | 0  | 0  | 0  | 0  | 0 | 0  |
| 0                                                                                                           | 0  | 0  | 0  | 0  | 0  | 0  | 0  |    |    |    |   |    |
| "Viruses;Uroviricota;Caudoviricetes;Caudoviricetes__na;Caudoviricetes__na;Caudoviricetes__na;Siphoviridae_s |    |    |    |    |    |    |    |    |    |    |   |    |
| p._ctCCX1"                                                                                                  | 0  | 0  | 1  | 0  | 0  | 0  | 0  | 0  | 1  | 0  | 0 | 0  |
| 25                                                                                                          | 17 | 9  | 4  | 0  | 1  | 10 | 9  | 4  | 3  | 1  | 2 | 11 |
| 4                                                                                                           | 1  | 0  | 0  | 0  | 4  | 1  | 0  | 0  | 0  | 0  | 9 | 8  |
| 0                                                                                                           | 0  | 0  | 0  | 53 | 34 | 1  | 0  | 0  | 0  | 7  | 6 | 1  |
| 0                                                                                                           | 0  | 0  | 2  | 4  | 0  | 0  | 0  | 0  | 25 | 3  | 0 | 0  |
| 0                                                                                                           | 0  | 33 | 17 | 0  | 5  | 0  | 0  |    |    |    |   |    |
| "Viruses;Uroviricota;Caudoviricetes;Caudoviricetes__na;Caudoviricetes__na;Caudoviricetes__na;Siphoviridae_s |    |    |    |    |    |    |    |    |    |    |   |    |
| p._ctClv11"                                                                                                 | 0  | 0  | 0  | 0  | 0  | 0  | 0  | 0  | 0  | 0  | 0 | 0  |
| 0                                                                                                           | 0  | 0  | 0  | 0  | 0  | 3  | 19 | 1  | 0  | 16 | 1 | 0  |
| 0                                                                                                           | 0  | 0  | 0  | 0  | 0  | 1  | 0  | 0  | 0  | 0  | 0 | 1  |
| 0                                                                                                           | 0  | 0  | 0  | 0  | 0  | 0  | 0  | 0  | 0  | 0  | 0 | 0  |
| 0                                                                                                           | 0  | 0  | 0  | 1  | 0  | 0  | 0  | 0  | 19 | 15 | 1 | 0  |
| 0                                                                                                           | 0  | 1  | 3  | 0  | 0  | 0  | 0  |    |    |    |   |    |
| "Viruses;Uroviricota;Caudoviricetes;Caudoviricetes__na;Caudoviricetes__na;Caudoviricetes__na;Siphoviridae_s |    |    |    |    |    |    |    |    |    |    |   |    |
| p._ctcj91"                                                                                                  | 0  | 0  | 0  | 0  | 0  | 0  | 0  | 0  | 0  | 0  | 0 | 0  |
| 1                                                                                                           | 0  | 0  | 0  | 0  | 2  | 1  | 0  | 0  | 0  | 0  | 0 | 0  |
| 1                                                                                                           | 0  | 0  | 0  | 0  | 0  | 0  | 0  | 0  | 0  | 0  | 0 | 0  |
| 0                                                                                                           | 0  | 0  | 0  | 0  | 0  | 0  | 0  | 27 | 0  | 1  | 2 | 0  |
| 0                                                                                                           | 0  | 0  | 1  | 1  | 0  | 0  | 0  | 0  | 0  | 0  | 0 | 0  |
| 0                                                                                                           | 0  | 0  | 0  | 0  | 0  | 0  | 0  |    |    |    |   |    |
| "Viruses;Uroviricota;Caudoviricetes;Caudoviricetes__na;Caudoviricetes__na;Caudoviricetes__na;Siphoviridae_s |    |    |    |    |    |    |    |    |    |    |   |    |
| p._ctCjJ10"                                                                                                 | 0  | 0  | 0  | 0  | 0  | 0  | 0  | 0  | 0  | 0  | 0 | 0  |
| 1                                                                                                           | 0  | 0  | 0  | 0  | 0  | 0  | 0  | 0  | 0  | 0  | 0 | 0  |
| 0                                                                                                           | 0  | 0  | 2  | 0  | 0  | 1  | 0  | 0  | 0  | 0  | 2 | 2  |
| 0                                                                                                           | 0  | 0  | 0  | 0  | 0  | 0  | 0  | 0  | 0  | 1  | 0 | 0  |
| 0                                                                                                           | 0  | 0  | 1  | 0  | 0  | 0  | 0  | 0  | 0  | 0  | 0 | 0  |
| 0                                                                                                           | 0  | 0  | 0  | 0  | 0  | 0  | 0  |    |    |    |   |    |
| "Viruses;Uroviricota;Caudoviricetes;Caudoviricetes__na;Caudoviricetes__na;Caudoviricetes__na;Siphoviridae_s |    |    |    |    |    |    |    |    |    |    |   |    |
| p._ctcK97"                                                                                                  | 0  | 0  | 0  | 0  | 0  | 0  | 0  | 0  | 0  | 0  | 0 | 0  |
| 0                                                                                                           | 0  | 0  | 0  | 0  | 0  | 0  | 0  | 0  | 0  | 0  | 0 | 0  |
| 0                                                                                                           | 0  | 0  | 0  | 0  | 0  | 0  | 0  | 0  | 0  | 0  | 0 | 0  |
| 0                                                                                                           | 0  | 1  | 0  | 0  | 0  | 19 | 3  | 0  | 0  | 5  | 1 | 10 |

|                                                                                                             |   |   |   |    |   |   |   |   |     |    |    |    |
|-------------------------------------------------------------------------------------------------------------|---|---|---|----|---|---|---|---|-----|----|----|----|
|                                                                                                             | 0 | 0 | 0 | 0  | 0 | 0 | 0 | 0 | 1   | 0  | 0  | 2  |
|                                                                                                             | 0 | 0 | 0 | 0  | 0 | 0 | 1 | 0 |     |    |    |    |
| "Viruses;Uroviricota;Caudoviricetes;Caudoviricetes__na;Caudoviricetes__na;Caudoviricetes__na;Siphoviridae_s |   |   |   |    |   |   |   |   |     |    |    |    |
| p._ctCIL93"                                                                                                 | 0 | 0 | 0 | 0  | 0 | 0 | 0 | 0 | 0   | 0  | 0  | 0  |
|                                                                                                             | 0 | 0 | 0 | 0  | 1 | 0 | 0 | 0 | 0   | 0  | 0  | 0  |
|                                                                                                             | 0 | 0 | 0 | 0  | 0 | 0 | 0 | 0 | 0   | 0  | 0  | 0  |
|                                                                                                             | 0 | 0 | 0 | 0  | 0 | 0 | 0 | 0 | 0   | 0  | 0  | 0  |
|                                                                                                             | 0 | 0 | 0 | 0  | 0 | 0 | 0 | 0 | 0   | 0  | 0  | 0  |
|                                                                                                             | 0 | 0 | 0 | 0  | 0 | 0 | 0 | 0 | 0   | 0  | 0  | 0  |
|                                                                                                             | 0 | 0 | 0 | 0  | 0 | 0 | 0 |   |     |    |    |    |
| "Viruses;Uroviricota;Caudoviricetes;Caudoviricetes__na;Caudoviricetes__na;Caudoviricetes__na;Siphoviridae_s |   |   |   |    |   |   |   |   |     |    |    |    |
| p._ctCsv15"                                                                                                 | 0 | 0 | 0 | 0  | 0 | 0 | 0 | 0 | 0   | 0  | 0  | 0  |
|                                                                                                             | 0 | 0 | 0 | 0  | 0 | 0 | 0 | 0 | 0   | 0  | 0  | 0  |
|                                                                                                             | 0 | 0 | 0 | 0  | 0 | 0 | 0 | 0 | 0   | 0  | 0  | 0  |
|                                                                                                             | 0 | 0 | 0 | 0  | 0 | 0 | 0 | 0 | 0   | 0  | 0  | 0  |
|                                                                                                             | 0 | 0 | 0 | 2  | 2 | 0 | 0 | 0 | 0   | 0  | 0  | 0  |
|                                                                                                             | 0 | 0 | 0 | 0  | 0 | 0 | 0 |   |     |    |    |    |
| "Viruses;Uroviricota;Caudoviricetes;Caudoviricetes__na;Caudoviricetes__na;Caudoviricetes__na;Siphoviridae_s |   |   |   |    |   |   |   |   |     |    |    |    |
| p._ctcUB23"                                                                                                 | 0 | 0 | 0 | 0  | 0 | 0 | 0 | 0 | 0   | 0  | 0  | 0  |
|                                                                                                             | 0 | 0 | 2 | 0  | 4 | 0 | 0 | 0 | 0   | 0  | 0  | 0  |
|                                                                                                             | 0 | 0 | 0 | 0  | 0 | 0 | 0 | 0 | 0   | 0  | 0  | 0  |
|                                                                                                             | 0 | 0 | 0 | 0  | 0 | 0 | 0 | 0 | 0   | 2  | 1  | 0  |
|                                                                                                             | 0 | 0 | 0 | 0  | 0 | 0 | 0 | 0 | 0   | 0  | 0  | 0  |
|                                                                                                             | 0 | 0 | 0 | 0  | 0 | 0 | 0 |   |     |    |    |    |
| "Viruses;Uroviricota;Caudoviricetes;Caudoviricetes__na;Caudoviricetes__na;Caudoviricetes__na;Siphoviridae_s |   |   |   |    |   |   |   |   |     |    |    |    |
| p._ctCUc43"                                                                                                 | 0 | 0 | 0 | 0  | 0 | 0 | 0 | 0 | 0   | 0  | 0  | 0  |
|                                                                                                             | 0 | 0 | 0 | 0  | 0 | 0 | 0 | 0 | 0   | 0  | 0  | 0  |
|                                                                                                             | 0 | 0 | 0 | 0  | 0 | 0 | 0 | 0 | 0   | 0  | 0  | 0  |
|                                                                                                             | 0 | 0 | 0 | 0  | 0 | 0 | 0 | 0 | 0   | 0  | 0  | 0  |
|                                                                                                             | 0 | 0 | 0 | 0  | 1 | 0 | 0 | 0 | 0   | 0  | 0  | 0  |
|                                                                                                             | 0 | 0 | 0 | 0  | 0 | 0 | 0 |   |     |    |    |    |
| "Viruses;Uroviricota;Caudoviricetes;Caudoviricetes__na;Caudoviricetes__na;Caudoviricetes__na;Siphoviridae_s |   |   |   |    |   |   |   |   |     |    |    |    |
| p._ctcuE16"                                                                                                 | 0 | 0 | 0 | 0  | 0 | 0 | 0 | 0 | 0   | 0  | 0  | 0  |
|                                                                                                             | 0 | 0 | 0 | 0  | 0 | 0 | 0 | 0 | 0   | 0  | 0  | 0  |
|                                                                                                             | 0 | 0 | 0 | 0  | 0 | 0 | 0 | 0 | 0   | 0  | 39 | 10 |
|                                                                                                             | 0 | 0 | 0 | 0  | 0 | 0 | 0 | 0 | 0   | 0  | 0  | 0  |
|                                                                                                             | 0 | 0 | 0 | 0  | 0 | 0 | 0 | 0 | 0   | 0  | 0  | 0  |
|                                                                                                             | 0 | 0 | 0 | 0  | 0 | 0 | 0 |   |     |    |    |    |
| "Viruses;Uroviricota;Caudoviricetes;Caudoviricetes__na;Caudoviricetes__na;Caudoviricetes__na;Siphoviridae_s |   |   |   |    |   |   |   |   |     |    |    |    |
| p._ctcx61"                                                                                                  | 0 | 0 | 0 | 0  | 0 | 0 | 0 | 0 | 0   | 0  | 0  | 0  |
|                                                                                                             | 0 | 0 | 0 | 0  | 0 | 0 | 0 | 0 | 0   | 0  | 0  | 0  |
|                                                                                                             | 0 | 0 | 0 | 0  | 0 | 0 | 0 | 0 | 0   | 0  | 0  | 0  |
|                                                                                                             | 0 | 0 | 0 | 0  | 0 | 0 | 0 | 0 | 0   | 0  | 0  | 0  |
|                                                                                                             | 0 | 0 | 0 | 0  | 0 | 0 | 0 | 0 | 111 | 13 | 34 | 86 |
|                                                                                                             | 4 | 0 | 0 | 0  | 0 | 0 | 0 |   |     |    |    |    |
| "Viruses;Uroviricota;Caudoviricetes;Caudoviricetes__na;Caudoviricetes__na;Caudoviricetes__na;Siphoviridae_s |   |   |   |    |   |   |   |   |     |    |    |    |
| p._ctD2Q91"                                                                                                 | 0 | 0 | 0 | 0  | 0 | 0 | 0 | 0 | 0   | 0  | 0  | 0  |
|                                                                                                             | 0 | 0 | 0 | 0  | 0 | 0 | 0 | 0 | 0   | 0  | 0  | 0  |
|                                                                                                             | 0 | 0 | 0 | 0  | 0 | 0 | 0 | 0 | 0   | 0  | 0  | 0  |
|                                                                                                             | 0 | 0 | 0 | 17 | 0 | 0 | 0 | 0 | 0   | 0  | 0  | 0  |

|                                                                                                             |   |   |   |    |    |    |   |   |   |   |   |   |
|-------------------------------------------------------------------------------------------------------------|---|---|---|----|----|----|---|---|---|---|---|---|
|                                                                                                             | 0 | 0 | 0 | 0  | 0  | 0  | 0 | 0 | 0 | 0 | 0 | 0 |
|                                                                                                             | 0 | 0 | 0 | 0  | 0  | 0  | 0 |   |   |   |   |   |
| "Viruses;Uroviricota;Caudoviricetes;Caudoviricetes__na;Caudoviricetes__na;Caudoviricetes__na;Siphoviridae_s |   |   |   |    |    |    |   |   |   |   |   |   |
| p._ctD6g5"                                                                                                  | 0 | 0 | 0 | 0  | 0  | 0  | 0 | 0 | 0 | 0 | 0 | 0 |
| 1                                                                                                           | 0 | 0 | 0 | 0  | 0  | 0  | 0 | 0 | 0 | 0 | 0 | 0 |
|                                                                                                             | 0 | 0 | 0 | 0  | 0  | 3  | 0 | 0 | 0 | 0 | 0 | 0 |
|                                                                                                             | 0 | 0 | 0 | 0  | 0  | 0  | 0 | 0 | 0 | 0 | 0 | 0 |
|                                                                                                             | 0 | 0 | 0 | 11 | 13 | 0  | 0 | 0 | 0 | 0 | 0 | 0 |
|                                                                                                             | 0 | 0 | 0 | 0  | 0  | 0  | 0 |   |   |   |   |   |
| "Viruses;Uroviricota;Caudoviricetes;Caudoviricetes__na;Caudoviricetes__na;Caudoviricetes__na;Siphoviridae_s |   |   |   |    |    |    |   |   |   |   |   |   |
| p._ctd9R8"                                                                                                  | 0 | 0 | 0 | 0  | 0  | 0  | 0 | 0 | 0 | 0 | 0 | 0 |
|                                                                                                             | 0 | 0 | 0 | 0  | 0  | 0  | 0 | 0 | 0 | 0 | 0 | 0 |
|                                                                                                             | 0 | 0 | 0 | 0  | 0  | 0  | 0 | 0 | 0 | 0 | 6 | 1 |
|                                                                                                             | 0 | 0 | 0 | 0  | 0  | 0  | 0 | 0 | 0 | 0 | 0 | 0 |
|                                                                                                             | 0 | 0 | 0 | 0  | 0  | 0  | 0 | 0 | 0 | 0 | 0 | 0 |
|                                                                                                             | 0 | 0 | 0 | 1  | 0  | 3  | 0 | 0 |   |   |   |   |
| "Viruses;Uroviricota;Caudoviricetes;Caudoviricetes__na;Caudoviricetes__na;Caudoviricetes__na;Siphoviridae_s |   |   |   |    |    |    |   |   |   |   |   |   |
| p._ctdau33"                                                                                                 | 0 | 0 | 0 | 0  | 0  | 0  | 0 | 0 | 0 | 0 | 0 | 0 |
|                                                                                                             | 0 | 0 | 0 | 0  | 0  | 0  | 0 | 0 | 0 | 0 | 0 | 0 |
|                                                                                                             | 0 | 0 | 0 | 0  | 0  | 0  | 0 | 0 | 0 | 0 | 7 | 3 |
|                                                                                                             | 0 | 1 | 0 | 5  | 0  | 0  | 0 | 0 | 0 | 0 | 0 | 0 |
|                                                                                                             | 0 | 0 | 0 | 0  | 0  | 0  | 0 | 0 | 0 | 0 | 0 | 0 |
|                                                                                                             | 0 | 0 | 0 | 0  | 0  | 0  | 0 |   |   |   |   |   |
| "Viruses;Uroviricota;Caudoviricetes;Caudoviricetes__na;Caudoviricetes__na;Caudoviricetes__na;Siphoviridae_s |   |   |   |    |    |    |   |   |   |   |   |   |
| p._ctDct3"                                                                                                  | 0 | 0 | 0 | 0  | 0  | 0  | 0 | 0 | 0 | 0 | 0 | 0 |
|                                                                                                             | 0 | 0 | 0 | 0  | 0  | 0  | 0 | 0 | 0 | 0 | 0 | 0 |
|                                                                                                             | 0 | 0 | 0 | 0  | 0  | 0  | 0 | 0 | 0 | 0 | 0 | 0 |
|                                                                                                             | 0 | 0 | 0 | 0  | 0  | 0  | 0 | 0 | 0 | 0 | 0 | 0 |
|                                                                                                             | 0 | 0 | 0 | 0  | 0  | 0  | 0 | 0 | 0 | 0 | 0 | 0 |
|                                                                                                             | 0 | 0 | 1 | 2  | 0  | 0  | 0 | 0 |   |   |   |   |
| "Viruses;Uroviricota;Caudoviricetes;Caudoviricetes__na;Caudoviricetes__na;Caudoviricetes__na;Siphoviridae_s |   |   |   |    |    |    |   |   |   |   |   |   |
| p._ctDcW16"                                                                                                 | 1 | 0 | 0 | 0  | 0  | 0  | 0 | 0 | 0 | 0 | 0 | 0 |
|                                                                                                             | 0 | 1 | 0 | 0  | 0  | 0  | 1 | 0 | 1 | 0 | 0 | 0 |
|                                                                                                             | 0 | 0 | 0 | 0  | 0  | 0  | 0 | 0 | 0 | 0 | 0 | 1 |
|                                                                                                             | 0 | 0 | 1 | 0  | 7  | 8  | 3 | 0 | 0 | 0 | 1 | 0 |
|                                                                                                             | 0 | 0 | 0 | 0  | 1  | 0  | 0 | 0 | 0 | 0 | 0 | 0 |
|                                                                                                             | 0 | 0 | 1 | 2  | 0  | 0  | 0 | 0 |   |   |   |   |
| "Viruses;Uroviricota;Caudoviricetes;Caudoviricetes__na;Caudoviricetes__na;Caudoviricetes__na;Siphoviridae_s |   |   |   |    |    |    |   |   |   |   |   |   |
| p._ctDDY10"                                                                                                 | 0 | 0 | 0 | 0  | 0  | 0  | 0 | 0 | 0 | 0 | 0 | 0 |
|                                                                                                             | 0 | 0 | 0 | 0  | 0  | 0  | 0 | 0 | 0 | 0 | 0 | 0 |
|                                                                                                             | 0 | 0 | 0 | 0  | 0  | 0  | 0 | 0 | 0 | 0 | 1 | 1 |
|                                                                                                             | 0 | 0 | 0 | 0  | 0  | 0  | 0 | 0 | 0 | 0 | 0 | 0 |
|                                                                                                             | 0 | 0 | 0 | 4  | 0  | 0  | 0 | 0 | 0 | 1 | 0 | 0 |
|                                                                                                             | 0 | 0 | 0 | 0  | 0  | 0  | 0 |   |   |   |   |   |
| "Viruses;Uroviricota;Caudoviricetes;Caudoviricetes__na;Caudoviricetes__na;Caudoviricetes__na;Siphoviridae_s |   |   |   |    |    |    |   |   |   |   |   |   |
| p._ctdEk19"                                                                                                 | 0 | 0 | 0 | 3  | 39 | 18 | 0 | 0 | 0 | 0 | 0 | 0 |
|                                                                                                             | 0 | 0 | 0 | 0  | 0  | 1  | 0 | 0 | 0 | 0 | 0 | 0 |
|                                                                                                             | 0 | 2 | 0 | 0  | 0  | 0  | 0 | 0 | 0 | 0 | 0 | 0 |
|                                                                                                             | 0 | 0 | 0 | 1  | 0  | 0  | 0 | 0 | 0 | 0 | 0 | 0 |

[illegible]

[illegible]

[illegible]



|                                                                                                             |   |   |   |    |   |   |   |   |   |   |   |   |
|-------------------------------------------------------------------------------------------------------------|---|---|---|----|---|---|---|---|---|---|---|---|
| 0                                                                                                           | 0 | 0 | 0 | 0  | 0 | 0 | 0 | 0 | 0 | 0 | 0 | 0 |
| 0                                                                                                           | 0 | 0 | 2 | 0  | 0 | 0 | 0 |   |   |   |   |   |
| "Viruses;Uroviricota;Caudoviricetes;Caudoviricetes__na;Caudoviricetes__na;Caudoviricetes__na;Siphoviridae_s |   |   |   |    |   |   |   |   |   |   |   |   |
| p._cteEQ43"                                                                                                 | 0 | 0 | 0 | 0  | 0 | 0 | 0 | 0 | 0 | 0 | 0 | 0 |
| 0                                                                                                           | 0 | 0 | 0 | 0  | 0 | 0 | 0 | 0 | 0 | 0 | 0 | 0 |
| 0                                                                                                           | 0 | 0 | 0 | 0  | 0 | 0 | 0 | 0 | 0 | 0 | 1 | 0 |
| 0                                                                                                           | 0 | 0 | 0 | 0  | 0 | 0 | 0 | 0 | 0 | 0 | 0 | 0 |
| 0                                                                                                           | 0 | 0 | 0 | 0  | 0 | 0 | 0 | 0 | 0 | 0 | 0 | 0 |
| 0                                                                                                           | 0 | 0 | 0 | 0  | 0 | 0 | 0 |   |   |   |   |   |
| "Viruses;Uroviricota;Caudoviricetes;Caudoviricetes__na;Caudoviricetes__na;Caudoviricetes__na;Siphoviridae_s |   |   |   |    |   |   |   |   |   |   |   |   |
| p._ctEfY6"                                                                                                  | 0 | 0 | 0 | 0  | 0 | 0 | 0 | 0 | 0 | 0 | 0 | 0 |
| 1                                                                                                           | 2 | 0 | 1 | 0  | 2 | 2 | 0 | 0 | 0 | 0 | 0 | 0 |
| 0                                                                                                           | 0 | 0 | 0 | 0  | 0 | 0 | 0 | 0 | 0 | 0 | 0 | 0 |
| 0                                                                                                           | 0 | 0 | 0 | 10 | 4 | 0 | 0 | 0 | 0 | 0 | 0 | 0 |
| 0                                                                                                           | 0 | 0 | 1 | 0  | 0 | 0 | 0 | 0 | 1 | 0 | 0 | 0 |
| 0                                                                                                           | 0 | 0 | 0 | 0  | 0 | 0 | 0 |   |   |   |   |   |
| "Viruses;Uroviricota;Caudoviricetes;Caudoviricetes__na;Caudoviricetes__na;Caudoviricetes__na;Siphoviridae_s |   |   |   |    |   |   |   |   |   |   |   |   |
| p._cteHV32"                                                                                                 | 0 | 0 | 0 | 0  | 0 | 0 | 0 | 0 | 0 | 0 | 0 | 0 |
| 0                                                                                                           | 0 | 0 | 0 | 0  | 0 | 0 | 0 | 0 | 0 | 0 | 0 | 0 |
| 2                                                                                                           | 0 | 0 | 0 | 0  | 0 | 0 | 0 | 0 | 0 | 0 | 0 | 0 |
| 0                                                                                                           | 0 | 0 | 0 | 0  | 0 | 0 | 0 | 0 | 0 | 0 | 0 | 0 |
| 0                                                                                                           | 0 | 0 | 0 | 0  | 0 | 0 | 0 | 0 | 0 | 0 | 0 | 0 |
| 0                                                                                                           | 0 | 0 | 0 | 0  | 0 | 0 | 0 |   |   |   |   |   |
| "Viruses;Uroviricota;Caudoviricetes;Caudoviricetes__na;Caudoviricetes__na;Caudoviricetes__na;Siphoviridae_s |   |   |   |    |   |   |   |   |   |   |   |   |
| p._ctElp38"                                                                                                 | 0 | 0 | 0 | 0  | 0 | 0 | 0 | 0 | 0 | 0 | 0 | 0 |
| 0                                                                                                           | 0 | 0 | 0 | 0  | 0 | 0 | 0 | 0 | 0 | 0 | 0 | 0 |
| 0                                                                                                           | 0 | 0 | 0 | 0  | 1 | 2 | 0 | 0 | 0 | 0 | 0 | 0 |
| 0                                                                                                           | 0 | 0 | 0 | 0  | 0 | 0 | 0 | 0 | 0 | 0 | 0 | 0 |
| 0                                                                                                           | 0 | 0 | 0 | 0  | 0 | 0 | 0 | 0 | 0 | 0 | 0 | 0 |
| 0                                                                                                           | 0 | 0 | 0 | 0  | 0 | 0 | 0 |   |   |   |   |   |
| "Viruses;Uroviricota;Caudoviricetes;Caudoviricetes__na;Caudoviricetes__na;Caudoviricetes__na;Siphoviridae_s |   |   |   |    |   |   |   |   |   |   |   |   |
| p._ctEJG5"                                                                                                  | 0 | 0 | 0 | 0  | 0 | 0 | 0 | 0 | 0 | 0 | 0 | 0 |
| 0                                                                                                           | 0 | 0 | 0 | 0  | 0 | 0 | 0 | 0 | 0 | 0 | 0 | 1 |
| 0                                                                                                           | 0 | 0 | 0 | 0  | 0 | 0 | 0 | 0 | 0 | 0 | 0 | 0 |
| 0                                                                                                           | 0 | 0 | 0 | 0  | 1 | 0 | 0 | 0 | 0 | 0 | 0 | 0 |
| 0                                                                                                           | 0 | 0 | 0 | 0  | 0 | 0 | 0 | 0 | 1 | 0 | 0 | 0 |
| 0                                                                                                           | 0 | 0 | 1 | 0  | 0 | 0 | 0 |   |   |   |   |   |
| "Viruses;Uroviricota;Caudoviricetes;Caudoviricetes__na;Caudoviricetes__na;Caudoviricetes__na;Siphoviridae_s |   |   |   |    |   |   |   |   |   |   |   |   |
| p._ctEJj1"                                                                                                  | 0 | 0 | 0 | 0  | 0 | 0 | 0 | 0 | 0 | 0 | 0 | 0 |
| 0                                                                                                           | 0 | 0 | 0 | 0  | 0 | 4 | 7 | 2 | 0 | 0 | 0 | 0 |
| 1                                                                                                           | 0 | 0 | 0 | 0  | 0 | 0 | 0 | 0 | 0 | 0 | 1 | 2 |
| 0                                                                                                           | 0 | 0 | 0 | 0  | 5 | 0 | 0 | 0 | 0 | 0 | 0 | 0 |
| 0                                                                                                           | 0 | 0 | 0 | 0  | 0 | 0 | 0 | 0 | 3 | 1 | 0 | 0 |
| 0                                                                                                           | 0 | 0 | 4 | 0  | 0 | 0 | 0 |   |   |   |   |   |
| "Viruses;Uroviricota;Caudoviricetes;Caudoviricetes__na;Caudoviricetes__na;Caudoviricetes__na;Siphoviridae_s |   |   |   |    |   |   |   |   |   |   |   |   |
| p._ctEkS11"                                                                                                 | 0 | 0 | 0 | 0  | 0 | 0 | 0 | 0 | 0 | 0 | 0 | 0 |
| 0                                                                                                           | 0 | 0 | 0 | 0  | 0 | 0 | 0 | 0 | 0 | 0 | 0 | 0 |
| 0                                                                                                           | 0 | 0 | 0 | 0  | 0 | 0 | 0 | 0 | 0 | 0 | 0 | 0 |
| 0                                                                                                           | 0 | 0 | 0 | 0  | 0 | 1 | 0 | 0 | 0 | 0 | 0 | 0 |

[illegible]

[illegible]

[illegible]

[illegible]

|                                                                                                             |   |   |     |   |   |   |   |   |   |   |   |   |
|-------------------------------------------------------------------------------------------------------------|---|---|-----|---|---|---|---|---|---|---|---|---|
|                                                                                                             | 0 | 0 | 663 | 0 | 0 | 0 | 0 | 0 | 0 | 0 | 0 | 0 |
|                                                                                                             | 0 | 0 | 0   | 0 | 0 | 3 | 0 | 0 |   |   |   |   |
| "Viruses;Uroviricota;Caudoviricetes;Caudoviricetes__na;Caudoviricetes__na;Caudoviricetes__na;Siphoviridae_s |   |   |     |   |   |   |   |   |   |   |   |   |
| p._ctGoR6"                                                                                                  | 0 | 0 | 0   | 0 | 0 | 0 | 0 | 0 | 0 | 0 | 0 | 0 |
|                                                                                                             | 0 | 0 | 0   | 0 | 0 | 0 | 0 | 0 | 0 | 0 | 0 | 0 |
|                                                                                                             | 0 | 0 | 0   | 0 | 0 | 0 | 0 | 0 | 0 | 0 | 0 | 0 |
|                                                                                                             | 0 | 0 | 0   | 0 | 0 | 0 | 0 | 0 | 0 | 0 | 0 | 0 |
|                                                                                                             | 0 | 0 | 0   | 0 | 0 | 0 | 0 | 0 | 0 | 0 | 0 | 0 |
|                                                                                                             | 0 | 0 | 0   | 0 | 0 | 0 | 0 | 0 | 0 | 0 | 0 | 0 |
|                                                                                                             | 0 | 0 | 1   | 0 | 0 | 0 | 0 | 0 |   |   |   |   |
| "Viruses;Uroviricota;Caudoviricetes;Caudoviricetes__na;Caudoviricetes__na;Caudoviricetes__na;Siphoviridae_s |   |   |     |   |   |   |   |   |   |   |   |   |
| p._ctGQT3"                                                                                                  | 0 | 0 | 0   | 0 | 0 | 0 | 0 | 0 | 0 | 0 | 0 | 0 |
|                                                                                                             | 0 | 0 | 0   | 0 | 0 | 0 | 0 | 0 | 0 | 0 | 0 | 0 |
|                                                                                                             | 0 | 0 | 0   | 0 | 0 | 0 | 0 | 0 | 0 | 0 | 0 | 0 |
|                                                                                                             | 0 | 0 | 0   | 0 | 0 | 0 | 0 | 0 | 0 | 0 | 0 | 0 |
|                                                                                                             | 0 | 0 | 0   | 5 | 2 | 0 | 0 | 0 | 0 | 0 | 0 | 0 |
|                                                                                                             | 0 | 0 | 0   | 0 | 0 | 0 | 0 | 0 |   |   |   |   |
| "Viruses;Uroviricota;Caudoviricetes;Caudoviricetes__na;Caudoviricetes__na;Caudoviricetes__na;Siphoviridae_s |   |   |     |   |   |   |   |   |   |   |   |   |
| p._ctgyq20"                                                                                                 | 0 | 0 | 0   | 0 | 0 | 0 | 0 | 0 | 0 | 0 | 0 | 0 |
|                                                                                                             | 0 | 0 | 0   | 0 | 0 | 0 | 1 | 0 | 0 | 0 | 0 | 0 |
|                                                                                                             | 0 | 0 | 0   | 0 | 0 | 0 | 0 | 0 | 0 | 0 | 0 | 0 |
|                                                                                                             | 0 | 0 | 0   | 0 | 0 | 1 | 0 | 0 | 0 | 0 | 0 | 0 |
|                                                                                                             | 0 | 0 | 0   | 0 | 0 | 0 | 0 | 0 | 0 | 0 | 0 | 0 |
|                                                                                                             | 0 | 0 | 0   | 1 | 0 | 0 | 0 | 0 |   |   |   |   |
| "Viruses;Uroviricota;Caudoviricetes;Caudoviricetes__na;Caudoviricetes__na;Caudoviricetes__na;Siphoviridae_s |   |   |     |   |   |   |   |   |   |   |   |   |
| p._ctGyV19"                                                                                                 | 0 | 0 | 0   | 0 | 0 | 0 | 0 | 0 | 0 | 0 | 0 | 0 |
|                                                                                                             | 0 | 0 | 0   | 0 | 0 | 0 | 0 | 0 | 0 | 0 | 0 | 0 |
|                                                                                                             | 0 | 0 | 0   | 0 | 0 | 0 | 0 | 0 | 0 | 0 | 2 | 0 |
|                                                                                                             | 0 | 0 | 0   | 0 | 0 | 0 | 0 | 0 | 0 | 0 | 0 | 0 |
|                                                                                                             | 0 | 0 | 0   | 0 | 0 | 0 | 0 | 0 | 0 | 0 | 0 | 0 |
|                                                                                                             | 0 | 0 | 0   | 0 | 0 | 0 | 0 | 0 |   |   |   |   |
| "Viruses;Uroviricota;Caudoviricetes;Caudoviricetes__na;Caudoviricetes__na;Caudoviricetes__na;Siphoviridae_s |   |   |     |   |   |   |   |   |   |   |   |   |
| p._ctH1110"                                                                                                 | 0 | 0 | 0   | 0 | 0 | 0 | 0 | 0 | 0 | 0 | 0 | 0 |
|                                                                                                             | 0 | 0 | 0   | 0 | 0 | 0 | 0 | 0 | 0 | 0 | 0 | 0 |
|                                                                                                             | 0 | 0 | 0   | 0 | 0 | 0 | 0 | 0 | 0 | 0 | 0 | 0 |
|                                                                                                             | 1 | 0 | 0   | 0 | 0 | 0 | 0 | 0 | 0 | 0 | 0 | 0 |
|                                                                                                             | 0 | 0 | 0   | 0 | 0 | 0 | 0 | 0 | 0 | 0 | 0 | 0 |
|                                                                                                             | 0 | 0 | 0   | 0 | 0 | 0 | 0 | 0 |   |   |   |   |
| "Viruses;Uroviricota;Caudoviricetes;Caudoviricetes__na;Caudoviricetes__na;Caudoviricetes__na;Siphoviridae_s |   |   |     |   |   |   |   |   |   |   |   |   |
| p._cth2082"                                                                                                 | 0 | 0 | 0   | 0 | 0 | 0 | 0 | 0 | 0 | 0 | 0 | 0 |
|                                                                                                             | 0 | 0 | 0   | 0 | 0 | 0 | 0 | 0 | 0 | 0 | 0 | 0 |
|                                                                                                             | 0 | 0 | 0   | 0 | 0 | 0 | 0 | 0 | 0 | 0 | 0 | 0 |
|                                                                                                             | 0 | 0 | 0   | 0 | 0 | 0 | 0 | 0 | 0 | 0 | 0 | 0 |
|                                                                                                             | 0 | 0 | 0   | 1 | 0 | 0 | 0 | 0 | 0 | 0 | 0 | 0 |
|                                                                                                             | 0 | 0 | 0   | 0 | 0 | 0 | 0 | 0 |   |   |   |   |
| "Viruses;Uroviricota;Caudoviricetes;Caudoviricetes__na;Caudoviricetes__na;Caudoviricetes__na;Siphoviridae_s |   |   |     |   |   |   |   |   |   |   |   |   |
| p._ctH8e11"                                                                                                 | 0 | 0 | 0   | 0 | 0 | 0 | 0 | 0 | 0 | 0 | 0 | 0 |
|                                                                                                             | 0 | 0 | 0   | 0 | 0 | 0 | 0 | 0 | 0 | 0 | 0 | 0 |
|                                                                                                             | 0 | 0 | 0   | 0 | 0 | 0 | 0 | 0 | 0 | 0 | 0 | 0 |
|                                                                                                             | 0 | 0 | 0   | 0 | 8 | 4 | 0 | 0 | 0 | 0 | 0 | 0 |

[illegible]

|                                                                                                             |   |   |    |    |    |    |   |   |    |   |   |   |
|-------------------------------------------------------------------------------------------------------------|---|---|----|----|----|----|---|---|----|---|---|---|
| 0                                                                                                           | 0 | 0 | 0  | 0  | 0  | 0  | 0 | 0 | 0  | 0 | 0 | 0 |
| 0                                                                                                           | 0 | 0 | 0  | 0  | 0  | 0  | 0 |   |    |   |   |   |
| "Viruses;Uroviricota;Caudoviricetes;Caudoviricetes__na;Caudoviricetes__na;Caudoviricetes__na;Siphoviridae_s |   |   |    |    |    |    |   |   |    |   |   |   |
| p_ctHiz26"                                                                                                  | 0 | 0 | 0  | 0  | 0  | 0  | 0 | 0 | 0  | 0 | 0 | 0 |
| 0                                                                                                           | 0 | 0 | 0  | 0  | 0  | 0  | 0 | 0 | 0  | 0 | 0 | 0 |
| 0                                                                                                           | 0 | 0 | 0  | 0  | 50 | 16 | 0 | 0 | 14 | 0 | 0 | 0 |
| 0                                                                                                           | 0 | 0 | 0  | 0  | 0  | 0  | 0 | 0 | 0  | 0 | 0 | 0 |
| 0                                                                                                           | 0 | 0 | 0  | 0  | 0  | 0  | 0 | 0 | 0  | 0 | 0 | 0 |
| 0                                                                                                           | 0 | 0 | 0  | 0  | 0  | 0  | 0 |   |    |   |   |   |
| "Viruses;Uroviricota;Caudoviricetes;Caudoviricetes__na;Caudoviricetes__na;Caudoviricetes__na;Siphoviridae_s |   |   |    |    |    |    |   |   |    |   |   |   |
| p_ctHjx9"                                                                                                   | 0 | 0 | 0  | 0  | 0  | 0  | 0 | 0 | 0  | 0 | 0 | 0 |
| 0                                                                                                           | 0 | 0 | 0  | 0  | 0  | 0  | 0 | 0 | 0  | 0 | 0 | 0 |
| 0                                                                                                           | 0 | 0 | 0  | 0  | 56 | 43 | 0 | 0 | 5  | 0 | 0 | 0 |
| 0                                                                                                           | 0 | 0 | 0  | 0  | 0  | 0  | 0 | 0 | 0  | 0 | 0 | 0 |
| 0                                                                                                           | 0 | 0 | 4  | 5  | 0  | 0  | 0 | 0 | 0  | 0 | 0 | 0 |
| 0                                                                                                           | 0 | 0 | 0  | 0  | 0  | 0  | 0 |   |    |   |   |   |
| "Viruses;Uroviricota;Caudoviricetes;Caudoviricetes__na;Caudoviricetes__na;Caudoviricetes__na;Siphoviridae_s |   |   |    |    |    |    |   |   |    |   |   |   |
| p_ctHjy10"                                                                                                  | 0 | 0 | 0  | 0  | 0  | 0  | 0 | 0 | 0  | 0 | 0 | 0 |
| 0                                                                                                           | 0 | 0 | 0  | 0  | 0  | 0  | 0 | 0 | 0  | 0 | 0 | 0 |
| 0                                                                                                           | 0 | 0 | 0  | 0  | 0  | 1  | 0 | 1 | 0  | 0 | 0 | 0 |
| 0                                                                                                           | 0 | 0 | 0  | 1  | 0  | 0  | 0 | 0 | 0  | 0 | 0 | 0 |
| 0                                                                                                           | 0 | 0 | 0  | 0  | 0  | 0  | 0 | 0 | 0  | 0 | 0 | 0 |
| 0                                                                                                           | 0 | 0 | 0  | 0  | 0  | 0  | 0 |   |    |   |   |   |
| "Viruses;Uroviricota;Caudoviricetes;Caudoviricetes__na;Caudoviricetes__na;Caudoviricetes__na;Siphoviridae_s |   |   |    |    |    |    |   |   |    |   |   |   |
| p_ctHMI2"                                                                                                   | 0 | 0 | 0  | 0  | 0  | 2  | 0 | 0 | 0  | 0 | 0 | 0 |
| 0                                                                                                           | 0 | 0 | 0  | 0  | 0  | 0  | 0 | 0 | 0  | 0 | 0 | 0 |
| 0                                                                                                           | 0 | 0 | 0  | 0  | 0  | 0  | 0 | 0 | 0  | 0 | 0 | 0 |
| 0                                                                                                           | 0 | 0 | 0  | 0  | 0  | 0  | 0 | 0 | 0  | 0 | 0 | 0 |
| 0                                                                                                           | 0 | 0 | 0  | 0  | 0  | 0  | 0 | 0 | 0  | 0 | 0 | 0 |
| 0                                                                                                           | 0 | 0 | 0  | 0  | 0  | 0  | 0 |   |    |   |   |   |
| "Viruses;Uroviricota;Caudoviricetes;Caudoviricetes__na;Caudoviricetes__na;Caudoviricetes__na;Siphoviridae_s |   |   |    |    |    |    |   |   |    |   |   |   |
| p_ctHn727"                                                                                                  | 0 | 0 | 0  | 0  | 0  | 0  | 0 | 0 | 0  | 0 | 0 | 0 |
| 0                                                                                                           | 0 | 0 | 0  | 0  | 0  | 0  | 0 | 0 | 0  | 0 | 0 | 0 |
| 0                                                                                                           | 0 | 0 | 0  | 0  | 2  | 5  | 0 | 0 | 0  | 0 | 0 | 0 |
| 0                                                                                                           | 0 | 0 | 0  | 0  | 0  | 0  | 0 | 0 | 0  | 0 | 0 | 0 |
| 0                                                                                                           | 0 | 0 | 11 | 15 | 0  | 0  | 0 | 0 | 0  | 0 | 0 | 0 |
| 0                                                                                                           | 0 | 1 | 7  | 0  | 0  | 0  | 0 |   |    |   |   |   |
| "Viruses;Uroviricota;Caudoviricetes;Caudoviricetes__na;Caudoviricetes__na;Caudoviricetes__na;Siphoviridae_s |   |   |    |    |    |    |   |   |    |   |   |   |
| p_ctHNNH2"                                                                                                  | 0 | 0 | 0  | 0  | 0  | 0  | 0 | 0 | 0  | 0 | 0 | 0 |
| 0                                                                                                           | 0 | 0 | 0  | 0  | 0  | 0  | 0 | 0 | 0  | 0 | 0 | 0 |
| 0                                                                                                           | 0 | 0 | 0  | 0  | 0  | 0  | 0 | 0 | 0  | 0 | 0 | 0 |
| 0                                                                                                           | 0 | 0 | 9  | 0  | 0  | 0  | 0 | 0 | 0  | 0 | 0 | 0 |
| 0                                                                                                           | 0 | 0 | 0  | 0  | 0  | 0  | 0 | 0 | 0  | 0 | 0 | 0 |
| 0                                                                                                           | 0 | 0 | 0  | 0  | 0  | 0  | 0 |   |    |   |   |   |
| "Viruses;Uroviricota;Caudoviricetes;Caudoviricetes__na;Caudoviricetes__na;Caudoviricetes__na;Siphoviridae_s |   |   |    |    |    |    |   |   |    |   |   |   |
| p_cthrG7"                                                                                                   | 0 | 0 | 0  | 0  | 0  | 0  | 0 | 0 | 0  | 0 | 0 | 0 |
| 0                                                                                                           | 0 | 0 | 0  | 0  | 0  | 0  | 0 | 0 | 0  | 0 | 0 | 0 |
| 0                                                                                                           | 0 | 0 | 0  | 0  | 0  | 0  | 0 | 0 | 0  | 0 | 0 | 0 |
| 0                                                                                                           | 0 | 0 | 0  | 0  | 0  | 0  | 0 | 0 | 0  | 1 | 1 | 0 |



[illegible]

[illegible]

|                                                                                                             |   |   |   |   |   |   |   |   |   |   |   |   |
|-------------------------------------------------------------------------------------------------------------|---|---|---|---|---|---|---|---|---|---|---|---|
| 0                                                                                                           | 0 | 0 | 0 | 0 | 0 | 0 | 0 | 0 | 0 | 0 | 0 | 0 |
| 0                                                                                                           | 0 | 0 | 0 | 0 | 0 | 0 | 0 |   |   |   |   |   |
| "Viruses;Uroviricota;Caudoviricetes;Caudoviricetes__na;Caudoviricetes__na;Caudoviricetes__na;Siphoviridae_s |   |   |   |   |   |   |   |   |   |   |   |   |
| p._ctj0s2"                                                                                                  | 0 | 0 | 0 | 0 | 0 | 0 | 0 | 0 | 0 | 0 | 0 | 0 |
| 0                                                                                                           | 0 | 0 | 0 | 0 | 0 | 0 | 0 | 0 | 0 | 0 | 0 | 0 |
| 0                                                                                                           | 0 | 0 | 0 | 0 | 0 | 0 | 0 | 0 | 0 | 0 | 0 | 0 |
| 0                                                                                                           | 0 | 0 | 5 | 0 | 0 | 0 | 0 | 0 | 0 | 0 | 0 | 0 |
| 0                                                                                                           | 0 | 0 | 0 | 0 | 0 | 0 | 0 | 0 | 0 | 0 | 0 | 0 |
| 0                                                                                                           | 0 | 0 | 0 | 0 | 0 | 0 | 0 |   |   |   |   |   |
| "Viruses;Uroviricota;Caudoviricetes;Caudoviricetes__na;Caudoviricetes__na;Caudoviricetes__na;Siphoviridae_s |   |   |   |   |   |   |   |   |   |   |   |   |
| p._ctj3t72"                                                                                                 | 0 | 0 | 1 | 0 | 0 | 0 | 0 | 0 | 0 | 0 | 0 | 0 |
| 0                                                                                                           | 0 | 0 | 0 | 0 | 0 | 0 | 0 | 0 | 0 | 0 | 0 | 0 |
| 0                                                                                                           | 0 | 0 | 0 | 0 | 0 | 0 | 0 | 0 | 0 | 0 | 0 | 0 |
| 0                                                                                                           | 0 | 0 | 0 | 0 | 0 | 0 | 0 | 0 | 0 | 0 | 0 | 0 |
| 0                                                                                                           | 0 | 0 | 0 | 0 | 0 | 0 | 0 | 0 | 0 | 0 | 0 | 0 |
| 0                                                                                                           | 0 | 0 | 0 | 0 | 0 | 0 | 0 |   |   |   |   |   |
| "Viruses;Uroviricota;Caudoviricetes;Caudoviricetes__na;Caudoviricetes__na;Caudoviricetes__na;Siphoviridae_s |   |   |   |   |   |   |   |   |   |   |   |   |
| p._ctj6w2"                                                                                                  | 0 | 0 | 0 | 0 | 0 | 0 | 0 | 0 | 0 | 0 | 0 | 0 |
| 0                                                                                                           | 0 | 0 | 0 | 0 | 0 | 0 | 0 | 0 | 0 | 0 | 0 | 0 |
| 0                                                                                                           | 0 | 0 | 0 | 0 | 0 | 0 | 0 | 0 | 0 | 0 | 0 | 0 |
| 0                                                                                                           | 0 | 0 | 0 | 0 | 0 | 0 | 0 | 0 | 0 | 0 | 0 | 0 |
| 0                                                                                                           | 0 | 0 | 0 | 2 | 0 | 0 | 0 | 0 | 0 | 0 | 0 | 0 |
| 0                                                                                                           | 0 | 0 | 0 | 0 | 0 | 0 | 0 |   |   |   |   |   |
| "Viruses;Uroviricota;Caudoviricetes;Caudoviricetes__na;Caudoviricetes__na;Caudoviricetes__na;Siphoviridae_s |   |   |   |   |   |   |   |   |   |   |   |   |
| p._ctj7f2"                                                                                                  | 0 | 0 | 0 | 0 | 0 | 0 | 0 | 0 | 0 | 0 | 3 | 0 |
| 0                                                                                                           | 0 | 0 | 0 | 0 | 0 | 0 | 0 | 0 | 0 | 0 | 0 | 0 |
| 0                                                                                                           | 0 | 0 | 0 | 0 | 0 | 0 | 0 | 0 | 0 | 0 | 0 | 0 |
| 0                                                                                                           | 0 | 0 | 0 | 0 | 0 | 0 | 0 | 0 | 0 | 0 | 0 | 0 |
| 0                                                                                                           | 0 | 0 | 0 | 0 | 0 | 0 | 0 | 0 | 0 | 0 | 0 | 0 |
| 0                                                                                                           | 0 | 0 | 0 | 0 | 0 | 0 | 0 |   |   |   |   |   |
| "Viruses;Uroviricota;Caudoviricetes;Caudoviricetes__na;Caudoviricetes__na;Caudoviricetes__na;Siphoviridae_s |   |   |   |   |   |   |   |   |   |   |   |   |
| p._ctj7x27"                                                                                                 | 0 | 0 | 0 | 0 | 0 | 0 | 0 | 0 | 0 | 0 | 0 | 0 |
| 0                                                                                                           | 0 | 0 | 0 | 0 | 0 | 0 | 0 | 0 | 0 | 0 | 0 | 0 |
| 0                                                                                                           | 0 | 0 | 0 | 0 | 0 | 0 | 0 | 0 | 0 | 0 | 0 | 0 |
| 0                                                                                                           | 0 | 0 | 1 | 0 | 0 | 0 | 0 | 0 | 0 | 0 | 0 | 0 |
| 0                                                                                                           | 0 | 0 | 0 | 0 | 0 | 0 | 0 | 0 | 0 | 0 | 0 | 0 |
| 0                                                                                                           | 0 | 0 | 0 | 0 | 0 | 0 | 0 |   |   |   |   |   |
| "Viruses;Uroviricota;Caudoviricetes;Caudoviricetes__na;Caudoviricetes__na;Caudoviricetes__na;Siphoviridae_s |   |   |   |   |   |   |   |   |   |   |   |   |
| p._ctj912"                                                                                                  | 0 | 0 | 0 | 0 | 0 | 0 | 0 | 0 | 0 | 0 | 0 | 0 |
| 0                                                                                                           | 0 | 0 | 0 | 0 | 0 | 0 | 0 | 0 | 0 | 0 | 0 | 0 |
| 0                                                                                                           | 0 | 0 | 0 | 0 | 0 | 0 | 0 | 0 | 0 | 0 | 0 | 0 |
| 0                                                                                                           | 0 | 0 | 4 | 0 | 0 | 0 | 0 | 0 | 0 | 0 | 0 | 0 |
| 0                                                                                                           | 0 | 0 | 0 | 0 | 0 | 0 | 0 | 0 | 0 | 0 | 0 | 0 |
| 0                                                                                                           | 0 | 0 | 0 | 0 | 0 | 0 | 0 |   |   |   |   |   |
| "Viruses;Uroviricota;Caudoviricetes;Caudoviricetes__na;Caudoviricetes__na;Caudoviricetes__na;Siphoviridae_s |   |   |   |   |   |   |   |   |   |   |   |   |
| p._ctjbC4"                                                                                                  | 0 | 0 | 0 | 0 | 0 | 0 | 0 | 0 | 0 | 0 | 0 | 0 |
| 0                                                                                                           | 0 | 0 | 0 | 0 | 0 | 0 | 0 | 0 | 0 | 0 | 0 | 1 |
| 1                                                                                                           | 0 | 0 | 0 | 0 | 0 | 1 | 0 | 0 | 0 | 0 | 0 | 1 |
| 0                                                                                                           | 0 | 0 | 0 | 0 | 5 | 0 | 0 | 0 | 0 | 4 | 3 | 0 |

|                                                                                                                           |   |    |    |    |   |   |   |   |   |   |   |   |
|---------------------------------------------------------------------------------------------------------------------------|---|----|----|----|---|---|---|---|---|---|---|---|
| 0                                                                                                                         | 0 | 0  | 1  | 0  | 0 | 0 | 0 | 0 | 0 | 0 | 0 | 0 |
| 0                                                                                                                         | 0 | 0  | 0  | 0  | 0 | 0 | 0 |   |   |   |   |   |
| "Viruses;Uroviricota;Caudoviricetes;Caudoviricetes__na;Caudoviricetes__na;Caudoviricetes__na;Siphoviridae_s<br>p_ctjbm8"  | 0 | 0  | 0  | 0  | 0 | 0 | 0 | 0 | 0 | 0 | 0 | 0 |
| 0                                                                                                                         | 0 | 0  | 0  | 0  | 0 | 0 | 0 | 0 | 0 | 0 | 0 | 0 |
| 0                                                                                                                         | 0 | 0  | 0  | 0  | 0 | 0 | 0 | 0 | 1 | 0 | 0 | 0 |
| 0                                                                                                                         | 0 | 0  | 0  | 0  | 0 | 0 | 0 | 0 | 0 | 0 | 0 | 0 |
| 0                                                                                                                         | 0 | 0  | 0  | 3  | 0 | 0 | 0 | 0 | 2 | 0 | 0 | 0 |
| 0                                                                                                                         | 0 | 2  | 1  | 0  | 0 | 0 | 0 |   |   |   |   |   |
| "Viruses;Uroviricota;Caudoviricetes;Caudoviricetes__na;Caudoviricetes__na;Caudoviricetes__na;Siphoviridae_s<br>p_ctjdk2"  | 0 | 1  | 0  | 0  | 0 | 0 | 0 | 0 | 0 | 0 | 0 | 0 |
| 0                                                                                                                         | 0 | 0  | 0  | 0  | 0 | 7 | 4 | 0 | 0 | 0 | 0 | 0 |
| 0                                                                                                                         | 0 | 0  | 0  | 0  | 2 | 6 | 0 | 0 | 0 | 0 | 2 | 1 |
| 0                                                                                                                         | 0 | 0  | 0  | 0  | 0 | 0 | 0 | 0 | 0 | 0 | 0 | 0 |
| 0                                                                                                                         | 0 | 0  | 12 | 14 | 2 | 1 | 0 | 0 | 0 | 0 | 0 | 0 |
| 0                                                                                                                         | 0 | 13 | 7  | 0  | 0 | 0 | 0 |   |   |   |   |   |
| "Viruses;Uroviricota;Caudoviricetes;Caudoviricetes__na;Caudoviricetes__na;Caudoviricetes__na;Siphoviridae_s<br>p_ctjfq5"  | 0 | 0  | 0  | 0  | 0 | 0 | 0 | 0 | 0 | 0 | 0 | 0 |
| 0                                                                                                                         | 0 | 0  | 0  | 0  | 0 | 0 | 0 | 0 | 0 | 0 | 0 | 0 |
| 0                                                                                                                         | 0 | 0  | 0  | 0  | 0 | 0 | 0 | 0 | 0 | 0 | 0 | 0 |
| 0                                                                                                                         | 0 | 0  | 0  | 0  | 0 | 0 | 0 | 1 | 0 | 0 | 0 | 0 |
| 0                                                                                                                         | 0 | 0  | 23 | 40 | 1 | 1 | 0 | 0 | 0 | 0 | 0 | 0 |
| 0                                                                                                                         | 0 | 0  | 1  | 0  | 0 | 0 | 0 |   |   |   |   |   |
| "Viruses;Uroviricota;Caudoviricetes;Caudoviricetes__na;Caudoviricetes__na;Caudoviricetes__na;Siphoviridae_s<br>p_ctj91"   | 0 | 0  | 0  | 0  | 0 | 0 | 0 | 0 | 0 | 0 | 0 | 0 |
| 0                                                                                                                         | 1 | 0  | 1  | 0  | 0 | 0 | 0 | 0 | 0 | 0 | 0 | 0 |
| 0                                                                                                                         | 0 | 0  | 0  | 0  | 0 | 0 | 0 | 0 | 0 | 0 | 0 | 0 |
| 0                                                                                                                         | 0 | 0  | 0  | 0  | 0 | 0 | 0 | 0 | 0 | 0 | 0 | 0 |
| 0                                                                                                                         | 0 | 0  | 0  | 1  | 0 | 0 | 0 | 0 | 0 | 0 | 0 | 0 |
| 0                                                                                                                         | 0 | 0  | 0  | 0  | 0 | 0 | 0 |   |   |   |   |   |
| "Viruses;Uroviricota;Caudoviricetes;Caudoviricetes__na;Caudoviricetes__na;Caudoviricetes__na;Siphoviridae_s<br>p_ctjLL6"  | 0 | 0  | 0  | 0  | 0 | 0 | 0 | 0 | 0 | 0 | 0 | 0 |
| 0                                                                                                                         | 0 | 0  | 0  | 0  | 0 | 0 | 0 | 0 | 0 | 0 | 0 | 0 |
| 0                                                                                                                         | 0 | 0  | 0  | 0  | 0 | 0 | 0 | 0 | 0 | 0 | 1 | 1 |
| 0                                                                                                                         | 0 | 0  | 0  | 0  | 0 | 0 | 0 | 0 | 0 | 0 | 0 | 0 |
| 0                                                                                                                         | 0 | 0  | 0  | 0  | 0 | 0 | 0 | 0 | 0 | 0 | 0 | 0 |
| 0                                                                                                                         | 0 | 0  | 0  | 0  | 0 | 0 | 0 |   |   |   |   |   |
| "Viruses;Uroviricota;Caudoviricetes;Caudoviricetes__na;Caudoviricetes__na;Caudoviricetes__na;Siphoviridae_s<br>p_ctjLm32" | 0 | 0  | 0  | 0  | 0 | 0 | 0 | 0 | 0 | 0 | 0 | 0 |
| 0                                                                                                                         | 0 | 0  | 0  | 0  | 0 | 0 | 0 | 0 | 0 | 0 | 0 | 0 |
| 0                                                                                                                         | 0 | 0  | 0  | 0  | 0 | 0 | 0 | 0 | 0 | 0 | 0 | 0 |
| 0                                                                                                                         | 0 | 0  | 0  | 0  | 0 | 0 | 0 | 0 | 0 | 5 | 7 | 0 |
| 0                                                                                                                         | 0 | 0  | 0  | 0  | 0 | 0 | 0 | 0 | 1 | 0 | 0 | 0 |
| 0                                                                                                                         | 0 | 0  | 0  | 0  | 0 | 0 | 0 |   |   |   |   |   |
| "Viruses;Uroviricota;Caudoviricetes;Caudoviricetes__na;Caudoviricetes__na;Caudoviricetes__na;Siphoviridae_s<br>p_ctjRi1"  | 0 | 0  | 0  | 0  | 0 | 0 | 0 | 0 | 0 | 0 | 0 | 0 |
| 0                                                                                                                         | 0 | 0  | 0  | 0  | 0 | 0 | 0 | 0 | 0 | 0 | 0 | 0 |
| 0                                                                                                                         | 0 | 0  | 0  | 0  | 0 | 0 | 0 | 0 | 0 | 0 | 0 | 0 |
| 0                                                                                                                         | 0 | 0  | 0  | 0  | 0 | 0 | 0 | 0 | 0 | 0 | 0 | 0 |

[illegible]

|                                                                                                             |   |   |   |   |   |   |   |   |   |   |    |   |
|-------------------------------------------------------------------------------------------------------------|---|---|---|---|---|---|---|---|---|---|----|---|
|                                                                                                             | 0 | 0 | 0 | 0 | 0 | 0 | 0 | 0 | 0 | 0 | 0  | 0 |
|                                                                                                             | 0 | 0 | 0 | 0 | 0 | 0 | 0 |   |   |   |    |   |
| "Viruses;Uroviricota;Caudoviricetes;Caudoviricetes__na;Caudoviricetes__na;Caudoviricetes__na;Siphoviridae_s |   |   |   |   |   |   |   |   |   |   |    |   |
| p._ctkfY9"                                                                                                  | 0 | 0 | 0 | 0 | 0 | 0 | 0 | 0 | 0 | 0 | 0  | 0 |
|                                                                                                             | 0 | 0 | 0 | 0 | 0 | 0 | 0 | 0 | 0 | 0 | 0  | 0 |
|                                                                                                             | 0 | 0 | 0 | 0 | 0 | 0 | 0 | 0 | 0 | 0 | 0  | 0 |
|                                                                                                             | 0 | 0 | 0 | 1 | 0 | 0 | 0 | 0 | 0 | 0 | 0  | 0 |
|                                                                                                             | 0 | 0 | 0 | 0 | 0 | 0 | 0 | 0 | 0 | 0 | 0  | 0 |
|                                                                                                             | 0 | 0 | 0 | 0 | 0 | 0 | 0 |   |   |   |    |   |
| "Viruses;Uroviricota;Caudoviricetes;Caudoviricetes__na;Caudoviricetes__na;Caudoviricetes__na;Siphoviridae_s |   |   |   |   |   |   |   |   |   |   |    |   |
| p._ctkI07"                                                                                                  | 0 | 0 | 0 | 0 | 0 | 0 | 0 | 0 | 0 | 0 | 0  | 0 |
|                                                                                                             | 0 | 0 | 0 | 0 | 0 | 0 | 0 | 0 | 0 | 0 | 0  | 0 |
|                                                                                                             | 0 | 0 | 0 | 0 | 0 | 0 | 0 | 0 | 0 | 0 | 0  | 0 |
|                                                                                                             | 0 | 0 | 0 | 0 | 0 | 0 | 0 | 0 | 0 | 0 | 0  | 0 |
|                                                                                                             | 0 | 0 | 0 | 0 | 0 | 0 | 0 | 0 | 0 | 0 | 0  | 0 |
|                                                                                                             | 0 | 0 | 1 | 3 | 0 | 0 | 0 |   |   |   |    |   |
| "Viruses;Uroviricota;Caudoviricetes;Caudoviricetes__na;Caudoviricetes__na;Caudoviricetes__na;Siphoviridae_s |   |   |   |   |   |   |   |   |   |   |    |   |
| p._ctkJH11"                                                                                                 | 0 | 0 | 0 | 0 | 0 | 0 | 0 | 0 | 0 | 0 | 0  | 0 |
|                                                                                                             | 1 | 0 | 0 | 0 | 1 | 0 | 0 | 0 | 0 | 0 | 0  | 0 |
|                                                                                                             | 0 | 0 | 0 | 0 | 0 | 0 | 0 | 0 | 0 | 0 | 0  | 0 |
|                                                                                                             | 0 | 0 | 0 | 0 | 0 | 0 | 0 | 0 | 0 | 0 | 0  | 0 |
|                                                                                                             | 0 | 0 | 0 | 0 | 1 | 0 | 0 | 0 | 0 | 0 | 0  | 0 |
|                                                                                                             | 0 | 0 | 0 | 0 | 0 | 0 | 0 |   |   |   |    |   |
| "Viruses;Uroviricota;Caudoviricetes;Caudoviricetes__na;Caudoviricetes__na;Caudoviricetes__na;Siphoviridae_s |   |   |   |   |   |   |   |   |   |   |    |   |
| p._ctkKB9"                                                                                                  | 0 | 0 | 0 | 0 | 0 | 0 | 0 | 0 | 0 | 0 | 0  | 0 |
|                                                                                                             | 2 | 1 | 0 | 0 | 0 | 0 | 0 | 0 | 0 | 0 | 0  | 0 |
|                                                                                                             | 0 | 0 | 0 | 0 | 0 | 0 | 0 | 0 | 0 | 0 | 0  | 0 |
|                                                                                                             | 0 | 0 | 0 | 0 | 0 | 0 | 0 | 0 | 0 | 0 | 0  | 0 |
|                                                                                                             | 0 | 0 | 0 | 0 | 0 | 0 | 0 | 0 | 0 | 0 | 0  | 0 |
|                                                                                                             | 0 | 0 | 0 | 0 | 0 | 0 | 0 |   |   |   |    |   |
| "Viruses;Uroviricota;Caudoviricetes;Caudoviricetes__na;Caudoviricetes__na;Caudoviricetes__na;Siphoviridae_s |   |   |   |   |   |   |   |   |   |   |    |   |
| p._ctkKt3"                                                                                                  | 0 | 0 | 0 | 0 | 0 | 0 | 0 | 0 | 0 | 0 | 0  | 0 |
|                                                                                                             | 0 | 1 | 0 | 0 | 0 | 0 | 0 | 0 | 0 | 0 | 0  | 0 |
|                                                                                                             | 0 | 0 | 0 | 0 | 0 | 0 | 1 | 0 | 0 | 0 | 0  | 0 |
|                                                                                                             | 0 | 0 | 0 | 0 | 0 | 0 | 0 | 0 | 0 | 0 | 0  | 0 |
|                                                                                                             | 0 | 0 | 0 | 1 | 0 | 0 | 0 | 0 | 0 | 0 | 0  | 0 |
|                                                                                                             | 0 | 0 | 0 | 0 | 0 | 0 | 0 |   |   |   |    |   |
| "Viruses;Uroviricota;Caudoviricetes;Caudoviricetes__na;Caudoviricetes__na;Caudoviricetes__na;Siphoviridae_s |   |   |   |   |   |   |   |   |   |   |    |   |
| p._ctksc2"                                                                                                  | 0 | 0 | 0 | 0 | 0 | 0 | 0 | 0 | 0 | 0 | 0  | 0 |
|                                                                                                             | 0 | 0 | 0 | 0 | 0 | 0 | 0 | 0 | 0 | 0 | 0  | 0 |
|                                                                                                             | 0 | 0 | 0 | 0 | 0 | 0 | 0 | 0 | 0 | 0 | 0  | 0 |
|                                                                                                             | 0 | 0 | 0 | 0 | 0 | 0 | 0 | 0 | 0 | 0 | 0  | 0 |
|                                                                                                             | 0 | 0 | 0 | 0 | 0 | 1 | 0 | 0 | 0 | 0 | 0  | 0 |
|                                                                                                             | 0 | 0 | 0 | 0 | 0 | 0 | 0 |   |   |   |    |   |
| "Viruses;Uroviricota;Caudoviricetes;Caudoviricetes__na;Caudoviricetes__na;Caudoviricetes__na;Siphoviridae_s |   |   |   |   |   |   |   |   |   |   |    |   |
| p._ctkV91"                                                                                                  | 0 | 0 | 0 | 0 | 0 | 0 | 0 | 0 | 0 | 0 | 42 | 0 |
|                                                                                                             | 0 | 0 | 0 | 0 | 0 | 0 | 0 | 0 | 0 | 0 | 0  | 0 |
|                                                                                                             | 0 | 0 | 0 | 0 | 0 | 0 | 0 | 0 | 0 | 3 | 0  | 0 |
|                                                                                                             | 0 | 0 | 0 | 0 | 0 | 0 | 0 | 8 | 0 | 0 | 0  | 0 |

|                                                                                                             |   |   |   |   |   |   |    |   |   |   |   |   |
|-------------------------------------------------------------------------------------------------------------|---|---|---|---|---|---|----|---|---|---|---|---|
|                                                                                                             | 0 | 0 | 0 | 0 | 0 | 0 | 0  | 0 | 0 | 0 | 0 | 0 |
|                                                                                                             | 0 | 0 | 0 | 0 | 0 | 0 | 0  |   |   |   |   |   |
| "Viruses;Uroviricota;Caudoviricetes;Caudoviricetes__na;Caudoviricetes__na;Caudoviricetes__na;Siphoviridae_s |   |   |   |   |   |   |    |   |   |   |   |   |
| p._ctKvA22"                                                                                                 | 0 | 0 | 0 | 0 | 0 | 0 | 0  | 0 | 0 | 0 | 0 | 0 |
|                                                                                                             | 0 | 0 | 0 | 0 | 0 | 0 | 0  | 0 | 0 | 0 | 0 | 0 |
|                                                                                                             | 0 | 0 | 0 | 0 | 0 | 1 | 0  | 0 | 0 | 0 | 0 | 0 |
|                                                                                                             | 0 | 0 | 1 | 0 | 2 | 7 | 2  | 0 | 0 | 0 | 0 | 0 |
|                                                                                                             | 0 | 0 | 0 | 0 | 0 | 0 | 0  | 0 | 0 | 0 | 0 | 0 |
|                                                                                                             | 0 | 0 | 0 | 0 | 0 | 0 | 0  |   |   |   |   |   |
| "Viruses;Uroviricota;Caudoviricetes;Caudoviricetes__na;Caudoviricetes__na;Caudoviricetes__na;Siphoviridae_s |   |   |   |   |   |   |    |   |   |   |   |   |
| p._ctKXi8"                                                                                                  | 0 | 0 | 0 | 0 | 0 | 0 | 0  | 0 | 0 | 0 | 0 | 0 |
|                                                                                                             | 0 | 0 | 0 | 1 | 0 | 0 | 0  | 0 | 0 | 0 | 0 | 0 |
|                                                                                                             | 0 | 0 | 0 | 0 | 0 | 0 | 0  | 0 | 0 | 0 | 0 | 0 |
|                                                                                                             | 0 | 0 | 0 | 0 | 0 | 0 | 0  | 0 | 0 | 7 | 1 | 0 |
|                                                                                                             | 0 | 0 | 0 | 0 | 0 | 0 | 0  | 0 | 0 | 0 | 0 | 0 |
|                                                                                                             | 0 | 0 | 0 | 0 | 0 | 0 | 0  |   |   |   |   |   |
| "Viruses;Uroviricota;Caudoviricetes;Caudoviricetes__na;Caudoviricetes__na;Caudoviricetes__na;Siphoviridae_s |   |   |   |   |   |   |    |   |   |   |   |   |
| p._ctKy93"                                                                                                  | 0 | 0 | 0 | 0 | 0 | 0 | 0  | 0 | 0 | 0 | 0 | 0 |
|                                                                                                             | 0 | 0 | 0 | 0 | 0 | 0 | 0  | 0 | 0 | 0 | 0 | 0 |
|                                                                                                             | 0 | 0 | 0 | 0 | 0 | 0 | 0  | 0 | 0 | 0 | 0 | 0 |
|                                                                                                             | 0 | 0 | 0 | 0 | 0 | 0 | 0  | 0 | 0 | 0 | 0 | 2 |
|                                                                                                             | 0 | 0 | 0 | 0 | 0 | 0 | 5  | 0 | 0 | 0 | 0 | 0 |
|                                                                                                             | 0 | 0 | 0 | 0 | 0 | 0 | 12 | 0 |   |   |   |   |
| "Viruses;Uroviricota;Caudoviricetes;Caudoviricetes__na;Caudoviricetes__na;Caudoviricetes__na;Siphoviridae_s |   |   |   |   |   |   |    |   |   |   |   |   |
| p._ctkyH28"                                                                                                 | 0 | 0 | 0 | 0 | 0 | 0 | 0  | 0 | 0 | 0 | 0 | 0 |
|                                                                                                             | 0 | 0 | 0 | 0 | 0 | 0 | 0  | 0 | 0 | 0 | 0 | 0 |
|                                                                                                             | 0 | 0 | 0 | 0 | 0 | 0 | 0  | 0 | 0 | 0 | 0 | 0 |
|                                                                                                             | 0 | 0 | 0 | 0 | 0 | 0 | 0  | 0 | 0 | 0 | 0 | 0 |
|                                                                                                             | 0 | 0 | 0 | 0 | 0 | 0 | 0  | 0 | 0 | 0 | 0 | 0 |
|                                                                                                             | 0 | 0 | 1 | 0 | 0 | 0 | 0  |   |   |   |   |   |
| "Viruses;Uroviricota;Caudoviricetes;Caudoviricetes__na;Caudoviricetes__na;Caudoviricetes__na;Siphoviridae_s |   |   |   |   |   |   |    |   |   |   |   |   |
| p._ctl0E3"                                                                                                  | 0 | 0 | 0 | 0 | 0 | 0 | 0  | 0 | 0 | 0 | 0 | 0 |
|                                                                                                             | 0 | 0 | 0 | 0 | 0 | 0 | 0  | 0 | 0 | 0 | 0 | 0 |
|                                                                                                             | 0 | 0 | 0 | 0 | 0 | 0 | 0  | 0 | 0 | 0 | 0 | 0 |
|                                                                                                             | 0 | 0 | 0 | 0 | 0 | 0 | 0  | 0 | 0 | 0 | 0 | 0 |
|                                                                                                             | 0 | 0 | 0 | 0 | 0 | 0 | 0  | 0 | 0 | 0 | 0 | 0 |
|                                                                                                             | 0 | 0 | 0 | 0 | 0 | 0 | 1  | 0 |   |   |   |   |
| "Viruses;Uroviricota;Caudoviricetes;Caudoviricetes__na;Caudoviricetes__na;Caudoviricetes__na;Siphoviridae_s |   |   |   |   |   |   |    |   |   |   |   |   |
| p._ctL0q1"                                                                                                  | 0 | 0 | 0 | 0 | 0 | 0 | 0  | 0 | 0 | 0 | 0 | 0 |
|                                                                                                             | 0 | 0 | 0 | 0 | 0 | 0 | 0  | 0 | 0 | 0 | 0 | 0 |
|                                                                                                             | 2 | 0 | 0 | 0 | 0 | 0 | 0  | 0 | 2 | 0 | 1 | 0 |
|                                                                                                             | 0 | 0 | 0 | 0 | 0 | 0 | 0  | 0 | 0 | 0 | 1 | 0 |
|                                                                                                             | 0 | 0 | 0 | 0 | 0 | 0 | 0  | 0 | 0 | 0 | 0 | 0 |
|                                                                                                             | 0 | 0 | 2 | 0 | 0 | 0 | 0  |   |   |   |   |   |
| "Viruses;Uroviricota;Caudoviricetes;Caudoviricetes__na;Caudoviricetes__na;Caudoviricetes__na;Siphoviridae_s |   |   |   |   |   |   |    |   |   |   |   |   |
| p._ctL4w2"                                                                                                  | 0 | 0 | 0 | 0 | 0 | 0 | 0  | 0 | 0 | 0 | 0 | 0 |
|                                                                                                             | 0 | 0 | 0 | 0 | 0 | 0 | 0  | 0 | 0 | 0 | 0 | 0 |
|                                                                                                             | 0 | 0 | 0 | 0 | 0 | 0 | 0  | 0 | 0 | 0 | 0 | 0 |
|                                                                                                             | 0 | 0 | 2 | 0 | 0 | 0 | 2  | 0 | 0 | 0 | 0 | 0 |

|                                                                                                             |   |   |     |   |    |   |   |   |   |   |   |   |
|-------------------------------------------------------------------------------------------------------------|---|---|-----|---|----|---|---|---|---|---|---|---|
|                                                                                                             | 0 | 0 | 0   | 0 | 0  | 0 | 0 | 0 | 0 | 0 | 0 | 0 |
|                                                                                                             | 0 | 0 | 0   | 0 | 0  | 0 | 0 |   |   |   |   |   |
| "Viruses;Uroviricota;Caudoviricetes;Caudoviricetes__na;Caudoviricetes__na;Caudoviricetes__na;Siphoviridae_s |   |   |     |   |    |   |   |   |   |   |   |   |
| p._ctl5G6"                                                                                                  | 0 | 0 | 0   | 0 | 0  | 0 | 0 | 0 | 0 | 0 | 0 | 0 |
|                                                                                                             | 0 | 0 | 0   | 0 | 0  | 0 | 0 | 0 | 0 | 0 | 0 | 4 |
|                                                                                                             | 3 | 0 | 0   | 0 | 0  | 1 | 4 | 0 | 0 | 0 | 0 | 2 |
|                                                                                                             | 0 | 0 | 0   | 0 | 0  | 0 | 0 | 0 | 0 | 1 | 4 | 0 |
|                                                                                                             | 0 | 0 | 0   | 3 | 11 | 0 | 0 | 0 | 0 | 3 | 1 | 0 |
|                                                                                                             | 0 | 0 | 0   | 1 | 0  | 0 | 0 |   |   |   |   |   |
| "Viruses;Uroviricota;Caudoviricetes;Caudoviricetes__na;Caudoviricetes__na;Caudoviricetes__na;Siphoviridae_s |   |   |     |   |    |   |   |   |   |   |   |   |
| p._ctl617"                                                                                                  | 0 | 0 | 0   | 0 | 0  | 0 | 0 | 0 | 0 | 0 | 0 | 0 |
|                                                                                                             | 0 | 0 | 0   | 0 | 0  | 0 | 0 | 0 | 0 | 0 | 0 | 0 |
|                                                                                                             | 0 | 0 | 0   | 0 | 0  | 0 | 0 | 0 | 0 | 0 | 0 | 0 |
|                                                                                                             | 0 | 0 | 0   | 0 | 0  | 0 | 0 | 0 | 0 | 0 | 0 | 0 |
|                                                                                                             | 0 | 0 | 0   | 0 | 0  | 0 | 0 | 0 | 0 | 0 | 0 | 0 |
|                                                                                                             | 0 | 0 | 0   | 1 | 0  | 0 | 0 |   |   |   |   |   |
| "Viruses;Uroviricota;Caudoviricetes;Caudoviricetes__na;Caudoviricetes__na;Caudoviricetes__na;Siphoviridae_s |   |   |     |   |    |   |   |   |   |   |   |   |
| p._ctl7J9"                                                                                                  | 0 | 0 | 0   | 0 | 0  | 0 | 0 | 0 | 0 | 0 | 0 | 0 |
|                                                                                                             | 0 | 0 | 0   | 0 | 0  | 0 | 0 | 0 | 0 | 0 | 0 | 0 |
|                                                                                                             | 0 | 0 | 0   | 0 | 0  | 0 | 0 | 0 | 0 | 0 | 2 | 0 |
|                                                                                                             | 0 | 0 | 0   | 0 | 0  | 0 | 0 | 0 | 0 | 0 | 0 | 0 |
|                                                                                                             | 0 | 0 | 0   | 0 | 0  | 0 | 0 | 0 | 0 | 0 | 0 | 0 |
|                                                                                                             | 0 | 0 | 0   | 0 | 0  | 0 | 0 |   |   |   |   |   |
| "Viruses;Uroviricota;Caudoviricetes;Caudoviricetes__na;Caudoviricetes__na;Caudoviricetes__na;Siphoviridae_s |   |   |     |   |    |   |   |   |   |   |   |   |
| p._ctlAw30"                                                                                                 | 0 | 0 | 0   | 0 | 0  | 0 | 0 | 0 | 0 | 0 | 0 | 0 |
|                                                                                                             | 0 | 0 | 0   | 0 | 0  | 0 | 0 | 0 | 0 | 0 | 0 | 0 |
|                                                                                                             | 0 | 0 | 0   | 0 | 0  | 0 | 0 | 0 | 0 | 0 | 1 | 0 |
|                                                                                                             | 0 | 0 | 0   | 0 | 0  | 0 | 0 | 0 | 0 | 9 | 8 | 7 |
|                                                                                                             | 0 | 1 | 0   | 0 | 0  | 0 | 0 | 0 | 0 | 0 | 0 | 0 |
|                                                                                                             | 0 | 0 | 0   | 0 | 0  | 0 | 0 |   |   |   |   |   |
| "Viruses;Uroviricota;Caudoviricetes;Caudoviricetes__na;Caudoviricetes__na;Caudoviricetes__na;Siphoviridae_s |   |   |     |   |    |   |   |   |   |   |   |   |
| p._ctlLeh52"                                                                                                | 0 | 0 | 0   | 0 | 0  | 0 | 0 | 0 | 0 | 0 | 0 | 0 |
|                                                                                                             | 0 | 0 | 0   | 0 | 0  | 0 | 0 | 0 | 0 | 0 | 0 | 0 |
|                                                                                                             | 0 | 0 | 0   | 0 | 0  | 0 | 0 | 0 | 0 | 0 | 0 | 0 |
|                                                                                                             | 0 | 0 | 0   | 0 | 0  | 0 | 0 | 0 | 0 | 0 | 0 | 0 |
|                                                                                                             | 0 | 0 | 260 | 0 | 0  | 0 | 0 | 0 | 0 | 0 | 0 | 0 |
|                                                                                                             | 0 | 0 | 0   | 1 | 0  | 0 | 0 |   |   |   |   |   |
| "Viruses;Uroviricota;Caudoviricetes;Caudoviricetes__na;Caudoviricetes__na;Caudoviricetes__na;Siphoviridae_s |   |   |     |   |    |   |   |   |   |   |   |   |
| p._ctlGc23"                                                                                                 | 0 | 0 | 0   | 0 | 0  | 0 | 0 | 0 | 0 | 0 | 0 | 0 |
|                                                                                                             | 0 | 0 | 0   | 0 | 0  | 0 | 0 | 0 | 0 | 0 | 0 | 0 |
|                                                                                                             | 0 | 0 | 0   | 0 | 0  | 0 | 0 | 0 | 0 | 0 | 0 | 0 |
|                                                                                                             | 0 | 0 | 0   | 0 | 0  | 0 | 0 | 0 | 0 | 0 | 0 | 0 |
|                                                                                                             | 0 | 0 | 0   | 0 | 0  | 0 | 0 | 0 | 0 | 0 | 0 | 0 |
|                                                                                                             | 0 | 0 | 1   | 1 | 0  | 0 | 0 |   |   |   |   |   |
| "Viruses;Uroviricota;Caudoviricetes;Caudoviricetes__na;Caudoviricetes__na;Caudoviricetes__na;Siphoviridae_s |   |   |     |   |    |   |   |   |   |   |   |   |
| p._ctlHU7"                                                                                                  | 0 | 0 | 0   | 0 | 0  | 0 | 0 | 0 | 0 | 0 | 0 | 0 |
|                                                                                                             | 0 | 1 | 0   | 2 | 2  | 1 | 0 | 2 | 0 | 0 | 0 | 0 |
|                                                                                                             | 0 | 0 | 0   | 0 | 0  | 0 | 0 | 0 | 0 | 0 | 1 | 0 |
|                                                                                                             | 0 | 0 | 1   | 0 | 3  | 1 | 1 | 0 | 0 | 1 | 1 | 0 |



[illegible]

[illegible]

|                                                                                                             |   |   |   |    |   |   |   |   |   |   |   |   |   |
|-------------------------------------------------------------------------------------------------------------|---|---|---|----|---|---|---|---|---|---|---|---|---|
|                                                                                                             | 0 | 0 | 0 | 0  | 0 | 0 | 0 | 0 | 0 | 0 | 0 | 0 | 0 |
|                                                                                                             | 0 | 0 | 0 | 0  | 0 | 0 | 0 | 0 | 0 | 0 | 0 | 0 | 0 |
| "Viruses;Uroviricota;Caudoviricetes;Caudoviricetes__na;Caudoviricetes__na;Caudoviricetes__na;Siphoviridae_s |   |   |   |    |   |   |   |   |   |   |   |   |   |
| p_ctmHK1"                                                                                                   | 0 | 0 | 0 | 0  | 0 | 0 | 0 | 0 | 0 | 0 | 0 | 0 | 0 |
|                                                                                                             | 0 | 0 | 0 | 0  | 0 | 0 | 0 | 0 | 0 | 0 | 0 | 0 | 0 |
|                                                                                                             | 0 | 0 | 0 | 0  | 0 | 0 | 0 | 0 | 0 | 0 | 0 | 0 | 0 |
|                                                                                                             | 0 | 0 | 0 | 2  | 0 | 0 | 0 | 0 | 0 | 0 | 0 | 0 | 0 |
|                                                                                                             | 0 | 0 | 0 | 0  | 0 | 0 | 0 | 0 | 0 | 0 | 0 | 0 | 0 |
|                                                                                                             | 0 | 0 | 0 | 0  | 0 | 0 | 0 | 0 | 0 | 0 | 0 | 0 | 0 |
| "Viruses;Uroviricota;Caudoviricetes;Caudoviricetes__na;Caudoviricetes__na;Caudoviricetes__na;Siphoviridae_s |   |   |   |    |   |   |   |   |   |   |   |   |   |
| p_ctmIh35"                                                                                                  | 0 | 0 | 0 | 0  | 0 | 0 | 0 | 0 | 0 | 0 | 0 | 0 | 0 |
|                                                                                                             | 0 | 0 | 0 | 0  | 0 | 0 | 0 | 0 | 0 | 0 | 0 | 0 | 0 |
|                                                                                                             | 0 | 0 | 0 | 0  | 0 | 0 | 0 | 0 | 0 | 0 | 0 | 0 | 0 |
|                                                                                                             | 0 | 0 | 0 | 96 | 0 | 0 | 0 | 0 | 0 | 0 | 0 | 0 | 0 |
|                                                                                                             | 0 | 0 | 0 | 0  | 0 | 0 | 0 | 0 | 0 | 0 | 0 | 0 | 0 |
|                                                                                                             | 0 | 0 | 0 | 0  | 0 | 0 | 1 | 0 | 0 | 0 | 0 | 0 | 0 |
| "Viruses;Uroviricota;Caudoviricetes;Caudoviricetes__na;Caudoviricetes__na;Caudoviricetes__na;Siphoviridae_s |   |   |   |    |   |   |   |   |   |   |   |   |   |
| p_ctMM521"                                                                                                  | 0 | 0 | 0 | 0  | 0 | 0 | 0 | 0 | 0 | 0 | 0 | 0 | 0 |
|                                                                                                             | 1 | 0 | 1 | 0  | 0 | 0 | 1 | 3 | 0 | 0 | 0 | 0 | 0 |
|                                                                                                             | 0 | 0 | 0 | 0  | 0 | 0 | 0 | 0 | 0 | 0 | 0 | 0 | 0 |
|                                                                                                             | 0 | 0 | 0 | 0  | 0 | 0 | 0 | 0 | 0 | 0 | 1 | 0 | 0 |
|                                                                                                             | 0 | 0 | 0 | 1  | 1 | 0 | 0 | 0 | 0 | 0 | 0 | 0 | 0 |
|                                                                                                             | 0 | 0 | 0 | 0  | 0 | 0 | 0 | 0 | 0 | 0 | 0 | 0 | 0 |
| "Viruses;Uroviricota;Caudoviricetes;Caudoviricetes__na;Caudoviricetes__na;Caudoviricetes__na;Siphoviridae_s |   |   |   |    |   |   |   |   |   |   |   |   |   |
| p_ctmpG14"                                                                                                  | 0 | 0 | 0 | 0  | 0 | 0 | 0 | 0 | 0 | 0 | 0 | 0 | 0 |
|                                                                                                             | 0 | 0 | 0 | 0  | 0 | 0 | 0 | 0 | 0 | 0 | 0 | 0 | 0 |
|                                                                                                             | 0 | 0 | 0 | 0  | 0 | 0 | 0 | 0 | 0 | 0 | 0 | 0 | 0 |
|                                                                                                             | 0 | 0 | 0 | 0  | 0 | 0 | 0 | 0 | 0 | 0 | 6 | 0 | 2 |
|                                                                                                             | 0 | 0 | 0 | 0  | 0 | 0 | 0 | 0 | 0 | 0 | 0 | 0 | 0 |
|                                                                                                             | 0 | 0 | 0 | 0  | 0 | 0 | 0 | 0 | 0 | 0 | 0 | 0 | 0 |
| "Viruses;Uroviricota;Caudoviricetes;Caudoviricetes__na;Caudoviricetes__na;Caudoviricetes__na;Siphoviridae_s |   |   |   |    |   |   |   |   |   |   |   |   |   |
| p_ctMq01"                                                                                                   | 0 | 0 | 0 | 0  | 0 | 0 | 0 | 0 | 0 | 0 | 0 | 0 | 0 |
|                                                                                                             | 0 | 0 | 0 | 0  | 0 | 0 | 0 | 0 | 0 | 0 | 0 | 0 | 0 |
|                                                                                                             | 0 | 0 | 0 | 0  | 0 | 0 | 0 | 0 | 0 | 0 | 0 | 0 | 0 |
|                                                                                                             | 0 | 0 | 0 | 1  | 0 | 0 | 0 | 0 | 0 | 0 | 0 | 0 | 0 |
|                                                                                                             | 0 | 0 | 0 | 0  | 0 | 0 | 0 | 0 | 0 | 0 | 0 | 0 | 0 |
|                                                                                                             | 0 | 0 | 0 | 0  | 0 | 0 | 0 | 0 | 0 | 0 | 0 | 0 | 0 |
| "Viruses;Uroviricota;Caudoviricetes;Caudoviricetes__na;Caudoviricetes__na;Caudoviricetes__na;Siphoviridae_s |   |   |   |    |   |   |   |   |   |   |   |   |   |
| p_ctmqi22"                                                                                                  | 0 | 0 | 0 | 0  | 0 | 0 | 0 | 0 | 0 | 0 | 0 | 0 | 0 |
|                                                                                                             | 0 | 0 | 0 | 0  | 0 | 0 | 0 | 0 | 0 | 0 | 0 | 0 | 0 |
|                                                                                                             | 0 | 0 | 0 | 0  | 0 | 0 | 1 | 0 | 0 | 0 | 0 | 0 | 1 |
|                                                                                                             | 0 | 0 | 0 | 0  | 0 | 0 | 0 | 0 | 0 | 0 | 0 | 0 | 0 |
|                                                                                                             | 0 | 0 | 0 | 1  | 2 | 0 | 0 | 0 | 0 | 0 | 0 | 0 | 0 |
|                                                                                                             | 0 | 0 | 0 | 0  | 0 | 0 | 0 | 0 | 0 | 0 | 0 | 0 | 0 |
| "Viruses;Uroviricota;Caudoviricetes;Caudoviricetes__na;Caudoviricetes__na;C                                 |   |   |   |    |   |   |   |   |   |   |   |   |   |



[illegible]









[illegible]

[illegible]

[illegible]

[illegible]

[illegible]

|                                                                                                             |    |    |   |   |    |    |   |   |   |    |    |   |    |
|-------------------------------------------------------------------------------------------------------------|----|----|---|---|----|----|---|---|---|----|----|---|----|
|                                                                                                             | 0  | 0  | 0 | 0 | 1  | 0  | 0 | 0 | 0 | 3  | 0  | 0 | 0  |
|                                                                                                             | 0  | 0  | 0 | 0 | 0  | 0  | 0 | 0 |   |    |    |   |    |
| "Viruses;Uroviricota;Caudoviricetes;Caudoviricetes__na;Caudoviricetes__na;Caudoviricetes__na;Siphoviridae_s |    |    |   |   |    |    |   |   |   |    |    |   |    |
| p._ctrfD19"                                                                                                 | 0  | 1  | 0 | 0 | 0  | 0  | 0 | 0 | 0 | 0  | 0  | 0 | 0  |
|                                                                                                             | 0  | 1  | 0 | 0 | 0  | 0  | 1 | 1 | 0 | 0  | 0  | 0 | 2  |
|                                                                                                             | 1  | 0  | 0 | 0 | 0  | 0  | 0 | 0 | 0 | 0  | 0  | 3 | 1  |
|                                                                                                             | 0  | 0  | 0 | 0 | 1  | 0  | 0 | 0 | 0 | 0  | 1  | 0 | 0  |
|                                                                                                             | 0  | 0  | 0 | 1 | 1  | 0  | 0 | 0 | 0 | 1  | 1  | 0 | 0  |
|                                                                                                             | 0  | 0  | 0 | 6 | 0  | 0  | 0 | 0 |   |    |    |   |    |
| "Viruses;Uroviricota;Caudoviricetes;Caudoviricetes__na;Caudoviricetes__na;Caudoviricetes__na;Siphoviridae_s |    |    |   |   |    |    |   |   |   |    |    |   |    |
| p._ctrG012"                                                                                                 | 0  | 0  | 0 | 0 | 0  | 0  | 0 | 0 | 0 | 0  | 0  | 0 | 0  |
|                                                                                                             | 0  | 0  | 0 | 0 | 0  | 0  | 0 | 0 | 0 | 0  | 0  | 0 | 27 |
|                                                                                                             | 13 | 14 | 1 | 1 | 0  | 0  | 0 | 0 | 0 | 0  | 0  | 0 | 0  |
|                                                                                                             | 0  | 0  | 0 | 0 | 0  | 0  | 0 | 0 | 0 | 0  | 0  | 0 | 0  |
|                                                                                                             | 0  | 0  | 0 | 0 | 0  | 0  | 0 | 0 | 0 | 0  | 0  | 0 | 0  |
|                                                                                                             | 0  | 0  | 0 | 0 | 0  | 0  | 0 | 0 |   |    |    |   |    |
| "Viruses;Uroviricota;Caudoviricetes;Caudoviricetes__na;Caudoviricetes__na;Caudoviricetes__na;Siphoviridae_s |    |    |   |   |    |    |   |   |   |    |    |   |    |
| p._ctRg61"                                                                                                  | 0  | 0  | 0 | 0 | 0  | 0  | 0 | 0 | 0 | 0  | 0  | 0 | 0  |
|                                                                                                             | 0  | 0  | 0 | 0 | 0  | 0  | 0 | 0 | 0 | 0  | 0  | 0 | 0  |
|                                                                                                             | 0  | 0  | 0 | 0 | 0  | 1  | 0 | 0 | 0 | 0  | 0  | 0 | 0  |
|                                                                                                             | 0  | 0  | 0 | 0 | 0  | 0  | 0 | 0 | 0 | 0  | 0  | 0 | 0  |
|                                                                                                             | 0  | 0  | 0 | 1 | 0  | 0  | 0 | 0 | 0 | 0  | 0  | 0 | 0  |
|                                                                                                             | 0  | 0  | 0 | 0 | 0  | 0  | 0 | 0 |   |    |    |   |    |
| "Viruses;Uroviricota;Caudoviricetes;Caudoviricetes__na;Caudoviricetes__na;Caudoviricetes__na;Siphoviridae_s |    |    |   |   |    |    |   |   |   |    |    |   |    |
| p._ctRg81"                                                                                                  | 0  | 0  | 0 | 0 | 0  | 0  | 0 | 0 | 0 | 0  | 0  | 0 | 0  |
|                                                                                                             | 0  | 0  | 0 | 0 | 0  | 0  | 0 | 0 | 0 | 0  | 0  | 0 | 0  |
|                                                                                                             | 0  | 0  | 0 | 0 | 0  | 0  | 0 | 0 | 0 | 0  | 0  | 0 | 0  |
|                                                                                                             | 0  | 0  | 0 | 0 | 0  | 0  | 0 | 0 | 0 | 0  | 1  | 0 | 0  |
|                                                                                                             | 0  | 0  | 0 | 0 | 0  | 0  | 0 | 0 | 0 | 2  | 0  | 0 | 0  |
|                                                                                                             | 0  | 0  | 0 | 0 | 0  | 0  | 0 | 0 |   |    |    |   |    |
| "Viruses;Uroviricota;Caudoviricetes;Caudoviricetes__na;Caudoviricetes__na;Caudoviricetes__na;Siphoviridae_s |    |    |   |   |    |    |   |   |   |    |    |   |    |
| p._ctrGQ8"                                                                                                  | 0  | 0  | 0 | 0 | 0  | 0  | 0 | 0 | 0 | 0  | 0  | 0 | 0  |
|                                                                                                             | 3  | 3  | 0 | 0 | 0  | 0  | 5 | 9 | 7 | 5  | 0  | 1 | 2  |
|                                                                                                             | 9  | 1  | 0 | 1 | 0  | 4  | 1 | 0 | 0 | 0  | 0  | 2 | 3  |
|                                                                                                             | 0  | 0  | 0 | 0 | 38 | 14 | 0 | 1 | 0 | 0  | 18 | 8 | 0  |
|                                                                                                             | 0  | 0  | 0 | 0 | 0  | 0  | 0 | 0 | 0 | 80 | 18 | 0 | 0  |
|                                                                                                             | 0  | 0  | 7 | 3 | 0  | 0  | 0 | 0 |   |    |    |   |    |
| "Viruses;Uroviricota;Caudoviricetes;Caudoviricetes__na;Caudoviricetes__na;Caudoviricetes__na;Siphoviridae_s |    |    |   |   |    |    |   |   |   |    |    |   |    |
| p._ctrGt10"                                                                                                 | 0  | 0  | 0 | 0 | 0  | 0  | 0 | 0 | 0 | 0  | 0  | 0 | 0  |
|                                                                                                             | 0  | 0  | 0 | 0 | 0  | 0  | 0 | 0 | 0 | 0  | 0  | 0 | 0  |
|                                                                                                             | 0  | 0  | 0 | 0 | 0  | 0  | 0 | 0 | 0 | 0  | 0  | 0 | 0  |
|                                                                                                             | 0  | 0  | 0 | 0 | 0  | 1  | 0 | 0 | 0 | 0  | 0  | 0 | 0  |
|                                                                                                             | 0  | 0  | 0 | 0 | 0  | 0  | 0 | 0 | 0 | 0  | 0  | 0 | 0  |
|                                                                                                             | 0  | 0  | 1 | 0 | 0  | 0  | 0 | 0 |   |    |    |   |    |
| "Viruses;Uroviricota;Caudoviricetes;Caudoviricetes__na;Caudoviricetes__na;Caudoviricetes__na;Siphoviridae_s |    |    |   |   |    |    |   |   |   |    |    |   |    |
| p._ctrGt12"                                                                                                 | 0  | 0  | 0 | 0 | 0  | 0  | 0 | 0 | 0 | 0  | 0  | 0 | 0  |
|                                                                                                             | 0  | 1  | 0 | 0 | 0  | 0  | 1 | 2 | 0 | 0  | 0  | 0 | 0  |
|                                                                                                             | 0  | 0  | 0 | 0 | 0  | 0  | 0 | 0 | 0 | 0  | 0  | 1 | 0  |
|                                                                                                             | 0  | 0  | 0 | 0 | 0  | 1  | 0 | 0 | 0 | 0  | 0  | 1 | 0  |

[illegible]

|                                                                                                             |   |   |   |    |   |   |   |   |   |   |   |   |
|-------------------------------------------------------------------------------------------------------------|---|---|---|----|---|---|---|---|---|---|---|---|
| 0                                                                                                           | 0 | 0 | 0 | 0  | 0 | 0 | 0 | 0 | 0 | 0 | 0 | 0 |
| 0                                                                                                           | 0 | 1 | 1 | 0  | 0 | 0 | 0 |   |   |   |   |   |
| "Viruses;Uroviricota;Caudoviricetes;Caudoviricetes__na;Caudoviricetes__na;Caudoviricetes__na;Siphoviridae_s |   |   |   |    |   |   |   |   |   |   |   |   |
| p_ctS1E53"                                                                                                  | 0 | 0 | 0 | 0  | 0 | 0 | 0 | 0 | 0 | 0 | 0 | 0 |
| 0                                                                                                           | 0 | 0 | 0 | 0  | 0 | 0 | 0 | 0 | 0 | 0 | 0 | 0 |
| 0                                                                                                           | 0 | 0 | 0 | 0  | 0 | 0 | 0 | 0 | 0 | 0 | 2 | 0 |
| 0                                                                                                           | 0 | 0 | 0 | 0  | 0 | 0 | 0 | 0 | 0 | 0 | 0 | 0 |
| 0                                                                                                           | 0 | 0 | 0 | 0  | 0 | 0 | 0 | 0 | 0 | 0 | 0 | 0 |
| 0                                                                                                           | 0 | 1 | 1 | 0  | 0 | 0 | 0 |   |   |   |   |   |
| "Viruses;Uroviricota;Caudoviricetes;Caudoviricetes__na;Caudoviricetes__na;Caudoviricetes__na;Siphoviridae_s |   |   |   |    |   |   |   |   |   |   |   |   |
| p_ctS2049"                                                                                                  | 0 | 0 | 0 | 0  | 0 | 0 | 0 | 0 | 0 | 0 | 0 | 0 |
| 0                                                                                                           | 0 | 0 | 0 | 0  | 0 | 0 | 0 | 0 | 0 | 0 | 0 | 0 |
| 0                                                                                                           | 0 | 0 | 0 | 0  | 0 | 0 | 0 | 0 | 0 | 0 | 2 | 0 |
| 0                                                                                                           | 0 | 0 | 0 | 0  | 0 | 0 | 0 | 0 | 0 | 0 | 0 | 0 |
| 0                                                                                                           | 0 | 0 | 0 | 0  | 0 | 0 | 0 | 0 | 0 | 0 | 0 | 0 |
| 0                                                                                                           | 0 | 0 | 0 | 0  | 0 | 0 | 0 |   |   |   |   |   |
| "Viruses;Uroviricota;Caudoviricetes;Caudoviricetes__na;Caudoviricetes__na;Caudoviricetes__na;Siphoviridae_s |   |   |   |    |   |   |   |   |   |   |   |   |
| p_ctS3r5"                                                                                                   | 0 | 0 | 0 | 0  | 0 | 0 | 0 | 0 | 0 | 0 | 0 | 0 |
| 1                                                                                                           | 0 | 0 | 0 | 0  | 0 | 0 | 0 | 0 | 0 | 0 | 0 | 0 |
| 0                                                                                                           | 0 | 0 | 0 | 0  | 0 | 0 | 0 | 0 | 0 | 0 | 0 | 0 |
| 0                                                                                                           | 0 | 0 | 0 | 0  | 0 | 0 | 0 | 0 | 0 | 0 | 0 | 0 |
| 0                                                                                                           | 0 | 0 | 0 | 0  | 0 | 0 | 0 | 0 | 0 | 0 | 0 | 0 |
| 0                                                                                                           | 0 | 0 | 0 | 0  | 0 | 0 | 0 |   |   |   |   |   |
| "Viruses;Uroviricota;Caudoviricetes;Caudoviricetes__na;Caudoviricetes__na;Caudoviricetes__na;Siphoviridae_s |   |   |   |    |   |   |   |   |   |   |   |   |
| p_ctSA812"                                                                                                  | 0 | 0 | 0 | 0  | 0 | 0 | 0 | 0 | 0 | 0 | 0 | 0 |
| 3                                                                                                           | 5 | 0 | 0 | 0  | 0 | 6 | 1 | 0 | 0 | 0 | 1 | 3 |
| 2                                                                                                           | 0 | 0 | 0 | 0  | 0 | 1 | 0 | 0 | 0 | 0 | 0 | 0 |
| 0                                                                                                           | 0 | 0 | 0 | 0  | 0 | 0 | 0 | 0 | 0 | 2 | 1 | 0 |
| 0                                                                                                           | 0 | 0 | 3 | 10 | 0 | 0 | 0 | 0 | 0 | 0 | 0 | 0 |
| 0                                                                                                           | 0 | 0 | 1 | 0  | 0 | 0 | 0 |   |   |   |   |   |
| "Viruses;Uroviricota;Caudoviricetes;Caudoviricetes__na;Caudoviricetes__na;Caudoviricetes__na;Siphoviridae_s |   |   |   |    |   |   |   |   |   |   |   |   |
| p_ctsAY3"                                                                                                   | 0 | 0 | 0 | 0  | 0 | 0 | 0 | 0 | 0 | 0 | 0 | 0 |
| 2                                                                                                           | 3 | 0 | 0 | 0  | 0 | 0 | 0 | 0 | 0 | 0 | 0 | 2 |
| 0                                                                                                           | 0 | 0 | 0 | 0  | 0 | 0 | 0 | 0 | 0 | 0 | 0 | 0 |
| 0                                                                                                           | 0 | 0 | 0 | 0  | 0 | 0 | 0 | 0 | 0 | 0 | 0 | 0 |
| 0                                                                                                           | 0 | 0 | 2 | 5  | 0 | 0 | 0 | 0 | 0 | 0 | 0 | 0 |
| 0                                                                                                           | 0 | 0 | 1 | 0  | 0 | 0 | 0 |   |   |   |   |   |
| "Viruses;Uroviricota;Caudoviricetes;Caudoviricetes__na;Caudoviricetes__na;Caudoviricetes__na;Siphoviridae_s |   |   |   |    |   |   |   |   |   |   |   |   |
| p_ctsfh5"                                                                                                   | 0 | 0 | 0 | 0  | 0 | 0 | 0 | 0 | 0 | 0 | 0 | 0 |
| 0                                                                                                           | 0 | 0 | 0 | 0  | 0 | 0 | 0 | 0 | 0 | 0 | 0 | 0 |
| 0                                                                                                           | 0 | 0 | 0 | 0  | 0 | 0 | 0 | 0 | 0 | 0 | 0 | 0 |
| 0                                                                                                           | 0 | 0 | 0 | 0  | 0 | 0 | 0 | 0 | 0 | 0 | 0 | 0 |
| 0                                                                                                           | 0 | 0 | 1 | 0  | 0 | 0 | 0 | 0 | 0 | 0 | 0 | 0 |
| 0                                                                                                           | 0 | 0 | 0 | 0  | 0 | 0 | 0 |   |   |   |   |   |
| "Viruses;Uroviricota;Caudoviricetes;Caudoviricetes__na;Caudoviricetes__na;Caudoviricetes__na;Siphoviridae_s |   |   |   |    |   |   |   |   |   |   |   |   |
| p_ctsgc4"                                                                                                   | 0 | 0 | 0 | 0  | 0 | 0 | 0 | 1 | 0 | 0 | 0 | 0 |
| 0                                                                                                           | 0 | 0 | 0 | 0  | 0 | 0 | 0 | 0 | 0 | 0 | 0 | 0 |
| 0                                                                                                           | 0 | 0 | 0 | 0  | 0 | 0 | 0 | 0 | 0 | 0 | 0 | 0 |
| 0                                                                                                           | 0 | 0 | 0 | 0  | 0 | 0 | 0 | 0 | 0 | 0 | 0 | 0 |



[illegible]

|                                                                                                             |   |   |   |   |   |   |   |   |   |   |   |   |
|-------------------------------------------------------------------------------------------------------------|---|---|---|---|---|---|---|---|---|---|---|---|
|                                                                                                             | 0 | 0 | 0 | 0 | 0 | 0 | 0 | 0 | 0 | 0 | 0 | 0 |
|                                                                                                             | 0 | 0 | 0 | 0 | 0 | 0 | 0 |   |   |   |   |   |
| "Viruses;Uroviricota;Caudoviricetes;Caudoviricetes__na;Caudoviricetes__na;Caudoviricetes__na;Siphoviridae_s |   |   |   |   |   |   |   |   |   |   |   |   |
| p._ctSx228"                                                                                                 | 0 | 0 | 0 | 0 | 0 | 0 | 0 | 0 | 0 | 0 | 0 | 0 |
|                                                                                                             | 0 | 0 | 1 | 0 | 0 | 0 | 0 | 0 | 0 | 0 | 0 | 0 |
|                                                                                                             | 0 | 0 | 0 | 0 | 0 | 0 | 0 | 0 | 0 | 0 | 0 | 0 |
|                                                                                                             | 0 | 0 | 0 | 0 | 0 | 0 | 1 | 0 | 0 | 0 | 0 | 0 |
|                                                                                                             | 0 | 0 | 0 | 0 | 0 | 0 | 0 | 0 | 0 | 0 | 0 | 0 |
|                                                                                                             | 0 | 0 | 0 | 0 | 0 | 0 | 0 |   |   |   |   |   |
| "Viruses;Uroviricota;Caudoviricetes;Caudoviricetes__na;Caudoviricetes__na;Caudoviricetes__na;Siphoviridae_s |   |   |   |   |   |   |   |   |   |   |   |   |
| p._ctsxw88"                                                                                                 | 0 | 0 | 0 | 0 | 0 | 0 | 0 | 0 | 0 | 0 | 0 | 0 |
|                                                                                                             | 0 | 0 | 0 | 0 | 0 | 0 | 0 | 0 | 0 | 1 | 0 | 0 |
|                                                                                                             | 0 | 0 | 0 | 0 | 0 | 0 | 0 | 0 | 0 | 0 | 0 | 0 |
|                                                                                                             | 0 | 0 | 0 | 0 | 0 | 0 | 0 | 0 | 0 | 0 | 0 | 0 |
|                                                                                                             | 0 | 0 | 0 | 0 | 0 | 0 | 0 | 0 | 0 | 0 | 0 | 0 |
|                                                                                                             | 0 | 0 | 0 | 0 | 0 | 0 | 0 |   |   |   |   |   |
| "Viruses;Uroviricota;Caudoviricetes;Caudoviricetes__na;Caudoviricetes__na;Caudoviricetes__na;Siphoviridae_s |   |   |   |   |   |   |   |   |   |   |   |   |
| p._ctsYb1"                                                                                                  | 0 | 0 | 0 | 0 | 0 | 0 | 0 | 0 | 0 | 0 | 0 | 0 |
|                                                                                                             | 0 | 0 | 0 | 0 | 0 | 0 | 0 | 0 | 0 | 0 | 0 | 0 |
|                                                                                                             | 0 | 0 | 0 | 0 | 0 | 0 | 0 | 0 | 0 | 0 | 0 | 0 |
|                                                                                                             | 0 | 0 | 0 | 0 | 0 | 0 | 0 | 0 | 0 | 3 | 0 | 0 |
|                                                                                                             | 0 | 0 | 0 | 0 | 0 | 0 | 0 | 0 | 1 | 0 | 0 | 0 |
|                                                                                                             | 0 | 0 | 0 | 0 | 0 | 0 | 0 |   |   |   |   |   |
| "Viruses;Uroviricota;Caudoviricetes;Caudoviricetes__na;Caudoviricetes__na;Caudoviricetes__na;Siphoviridae_s |   |   |   |   |   |   |   |   |   |   |   |   |
| p._ctt0c4"                                                                                                  | 0 | 0 | 0 | 0 | 0 | 0 | 0 | 0 | 0 | 0 | 0 | 0 |
|                                                                                                             | 0 | 0 | 0 | 1 | 0 | 0 | 0 | 0 | 0 | 0 | 0 | 0 |
|                                                                                                             | 0 | 0 | 0 | 0 | 0 | 0 | 0 | 0 | 0 | 0 | 0 | 0 |
|                                                                                                             | 0 | 0 | 0 | 0 | 0 | 0 | 0 | 0 | 0 | 0 | 0 | 0 |
|                                                                                                             | 0 | 0 | 0 | 0 | 0 | 0 | 0 | 0 | 0 | 0 | 0 | 0 |
|                                                                                                             | 0 | 0 | 0 | 0 | 0 | 0 | 0 |   |   |   |   |   |
| "Viruses;Uroviricota;Caudoviricetes;Caudoviricetes__na;Caudoviricetes__na;Caudoviricetes__na;Siphoviridae_s |   |   |   |   |   |   |   |   |   |   |   |   |
| p._cttb18"                                                                                                  | 0 | 0 | 0 | 0 | 0 | 0 | 0 | 0 | 0 | 0 | 0 | 0 |
|                                                                                                             | 0 | 0 | 0 | 0 | 0 | 0 | 0 | 0 | 0 | 0 | 0 | 0 |
|                                                                                                             | 0 | 0 | 0 | 0 | 0 | 0 | 0 | 0 | 0 | 0 | 0 | 0 |
|                                                                                                             | 0 | 0 | 0 | 0 | 0 | 0 | 0 | 0 | 1 | 0 | 0 | 0 |
|                                                                                                             | 0 | 0 | 0 | 0 | 0 | 0 | 0 | 0 | 0 | 0 | 0 | 0 |
|                                                                                                             | 0 | 0 | 0 | 0 | 0 | 0 | 0 |   |   |   |   |   |
| "Viruses;Uroviricota;Caudoviricetes;Caudoviricetes__na;Caudoviricetes__na;Caudoviricetes__na;Siphoviridae_s |   |   |   |   |   |   |   |   |   |   |   |   |
| p._ctTBd21"                                                                                                 | 0 | 0 | 0 | 0 | 0 | 0 | 0 | 0 | 0 | 0 | 0 | 0 |
|                                                                                                             | 0 | 0 | 0 | 0 | 0 | 0 | 0 | 0 | 0 | 0 | 0 | 2 |
|                                                                                                             | 2 | 0 | 0 | 0 | 0 | 0 | 0 | 0 | 0 | 0 | 0 | 0 |
|                                                                                                             | 0 | 0 | 0 | 0 | 0 | 1 | 0 | 0 | 0 | 0 | 0 | 0 |
|                                                                                                             | 0 | 0 | 0 | 0 | 0 | 0 | 0 | 0 | 0 | 0 | 0 | 0 |
|                                                                                                             | 0 | 0 | 0 | 0 | 0 | 0 | 0 |   |   |   |   |   |
| "Viruses;Uroviricota;Caudoviricetes;Caudoviricetes__na;Caudoviricetes__na;Caudoviricetes__na;Siphoviridae_s |   |   |   |   |   |   |   |   |   |   |   |   |
| p._ctTC45"                                                                                                  | 0 | 0 | 0 | 0 | 0 | 0 | 0 | 0 | 0 | 0 | 0 | 0 |
|                                                                                                             | 0 | 1 | 4 | 0 | 1 | 0 | 0 | 0 | 0 | 0 | 0 | 1 |
|                                                                                                             | 4 | 0 | 0 | 0 | 0 | 0 | 2 | 0 | 0 | 0 | 0 | 0 |
|                                                                                                             | 0 | 0 | 0 | 0 | 0 | 7 | 9 | 0 | 0 | 0 | 0 | 0 |

[illegible]

[illegible]

[illegible]

[illegible]



|                                                                                                             |   |   |   |    |    |   |   |   |   |   |   |   |
|-------------------------------------------------------------------------------------------------------------|---|---|---|----|----|---|---|---|---|---|---|---|
|                                                                                                             | 0 | 0 | 0 | 1  | 1  | 0 | 0 | 0 | 0 | 0 | 0 | 0 |
|                                                                                                             | 0 | 0 | 0 | 2  | 0  | 0 | 0 | 0 |   |   |   |   |
| "Viruses;Uroviricota;Caudoviricetes;Caudoviricetes__na;Caudoviricetes__na;Caudoviricetes__na;Siphoviridae_s |   |   |   |    |    |   |   |   |   |   |   |   |
| p._ctVqj4"                                                                                                  | 0 | 0 | 0 | 0  | 0  | 0 | 0 | 0 | 0 | 0 | 0 | 0 |
|                                                                                                             | 0 | 0 | 0 | 0  | 0  | 0 | 0 | 1 | 0 | 0 | 0 | 0 |
|                                                                                                             | 0 | 0 | 0 | 0  | 0  | 0 | 0 | 0 | 0 | 0 | 0 | 0 |
|                                                                                                             | 0 | 0 | 0 | 0  | 4  | 5 | 3 | 0 | 0 | 0 | 0 | 0 |
|                                                                                                             | 0 | 0 | 0 | 0  | 0  | 0 | 0 | 0 | 0 | 0 | 0 | 0 |
|                                                                                                             | 0 | 0 | 0 | 0  | 0  | 0 | 0 | 0 |   |   |   |   |
| "Viruses;Uroviricota;Caudoviricetes;Caudoviricetes__na;Caudoviricetes__na;Caudoviricetes__na;Siphoviridae_s |   |   |   |    |    |   |   |   |   |   |   |   |
| p._ctvS314"                                                                                                 | 0 | 0 | 0 | 0  | 0  | 0 | 0 | 0 | 0 | 0 | 0 | 0 |
|                                                                                                             | 0 | 0 | 0 | 0  | 0  | 0 | 0 | 0 | 0 | 0 | 0 | 0 |
|                                                                                                             | 0 | 0 | 0 | 0  | 0  | 0 | 0 | 0 | 0 | 0 | 0 | 0 |
|                                                                                                             | 0 | 0 | 0 | 1  | 0  | 0 | 0 | 0 | 0 | 0 | 0 | 0 |
|                                                                                                             | 0 | 0 | 0 | 0  | 0  | 0 | 0 | 0 | 0 | 0 | 0 | 0 |
|                                                                                                             | 0 | 0 | 0 | 0  | 0  | 0 | 0 | 0 |   |   |   |   |
| "Viruses;Uroviricota;Caudoviricetes;Caudoviricetes__na;Caudoviricetes__na;Caudoviricetes__na;Siphoviridae_s |   |   |   |    |    |   |   |   |   |   |   |   |
| p._ctvuW5"                                                                                                  | 0 | 0 | 0 | 0  | 0  | 0 | 0 | 0 | 0 | 0 | 0 | 0 |
|                                                                                                             | 0 | 0 | 0 | 0  | 0  | 0 | 0 | 0 | 0 | 0 | 0 | 0 |
|                                                                                                             | 0 | 0 | 0 | 0  | 0  | 0 | 0 | 0 | 0 | 0 | 1 | 6 |
|                                                                                                             | 0 | 0 | 0 | 0  | 12 | 5 | 9 | 1 | 0 | 0 | 0 | 0 |
|                                                                                                             | 0 | 0 | 0 | 0  | 0  | 0 | 0 | 0 | 0 | 0 | 0 | 0 |
|                                                                                                             | 0 | 0 | 0 | 0  | 0  | 0 | 0 | 0 |   |   |   |   |
| "Viruses;Uroviricota;Caudoviricetes;Caudoviricetes__na;Caudoviricetes__na;Caudoviricetes__na;Siphoviridae_s |   |   |   |    |    |   |   |   |   |   |   |   |
| p._ctvWR21"                                                                                                 | 0 | 0 | 0 | 0  | 0  | 0 | 0 | 0 | 0 | 0 | 0 | 0 |
|                                                                                                             | 0 | 0 | 0 | 0  | 0  | 0 | 0 | 0 | 0 | 0 | 0 | 0 |
|                                                                                                             | 0 | 0 | 0 | 0  | 0  | 1 | 0 | 0 | 0 | 0 | 0 | 0 |
|                                                                                                             | 0 | 0 | 0 | 0  | 0  | 0 | 0 | 0 | 0 | 0 | 0 | 0 |
|                                                                                                             | 0 | 0 | 0 | 0  | 0  | 0 | 0 | 0 | 0 | 0 | 0 | 0 |
|                                                                                                             | 0 | 0 | 0 | 0  | 0  | 0 | 0 | 0 | 0 | 0 | 0 | 0 |
| "Viruses;Uroviricota;Caudoviricetes;Caudoviricetes__na;Caudoviricetes__na;Caudoviricetes__na;Siphoviridae_s |   |   |   |    |    |   |   |   |   |   |   |   |
| p._ctvxh7"                                                                                                  | 0 | 0 | 0 | 0  | 0  | 0 | 0 | 0 | 0 | 0 | 0 | 0 |
|                                                                                                             | 0 | 0 | 0 | 0  | 0  | 4 | 0 | 0 | 0 | 0 | 0 | 0 |
|                                                                                                             | 0 | 0 | 0 | 0  | 0  | 0 | 0 | 0 | 0 | 0 | 0 | 0 |
|                                                                                                             | 0 | 0 | 0 | 0  | 0  | 0 | 0 | 0 | 0 | 0 | 0 | 0 |
|                                                                                                             | 0 | 0 | 0 | 7  | 4  | 0 | 0 | 0 | 0 | 0 | 0 | 0 |
|                                                                                                             | 0 | 0 | 0 | 0  | 0  | 0 | 0 | 0 |   |   |   |   |
| "Viruses;Uroviricota;Caudoviricetes;Caudoviricetes__na;Caudoviricetes__na;Caudoviricetes__na;Siphoviridae_s |   |   |   |    |    |   |   |   |   |   |   |   |
| p._ctvyM23"                                                                                                 | 0 | 0 | 0 | 0  | 0  | 0 | 0 | 0 | 0 | 0 | 0 | 0 |
|                                                                                                             | 0 | 0 | 0 | 0  | 0  | 0 | 0 | 0 | 0 | 0 | 0 | 0 |
|                                                                                                             | 0 | 0 | 0 | 0  | 0  | 0 | 0 | 0 | 0 | 0 | 0 | 0 |
|                                                                                                             | 0 | 0 | 0 | 0  | 0  | 0 | 0 | 0 | 0 | 0 | 0 | 0 |
|                                                                                                             | 0 | 0 | 0 | 1  | 0  | 0 | 0 | 0 | 0 | 0 | 0 | 0 |
|                                                                                                             | 0 | 0 | 0 | 0  | 0  | 0 | 0 | 0 |   |   |   |   |
| "Viruses;Uroviricota;Caudoviricetes;Caudoviricetes__na;Caudoviricetes__na;Caudoviricetes__na;Siphoviridae_s |   |   |   |    |    |   |   |   |   |   |   |   |
| p._ctW4q29"                                                                                                 | 0 | 0 | 0 | 0  | 0  | 0 | 0 | 0 | 0 | 0 | 0 | 0 |
|                                                                                                             | 0 | 0 | 0 | 0  | 0  | 0 | 0 | 0 | 0 | 0 | 0 | 0 |
|                                                                                                             | 1 | 1 | 0 | 0  | 0  | 0 | 1 | 0 | 0 | 0 | 2 | 0 |
|                                                                                                             | 0 | 0 | 0 | 87 | 0  | 0 | 0 | 0 | 0 | 0 | 0 | 0 |

























|                                                                                                             |   |   |   |   |   |   |   |   |   |   |   |   |
|-------------------------------------------------------------------------------------------------------------|---|---|---|---|---|---|---|---|---|---|---|---|
| 0                                                                                                           | 0 | 0 | 0 | 0 | 0 | 0 | 0 | 0 | 0 | 0 | 0 | 0 |
| 0                                                                                                           | 0 | 0 | 0 | 0 | 0 | 0 | 0 | 0 | 0 |   |   |   |
| "Viruses;Uroviricota;Caudoviricetes;Caudoviricetes__na;Caudoviricetes__na;Caudoviricetes__na;Stenotrophom   |   |   |   |   |   |   |   |   |   |   |   |   |
| onas_phage_vB_SmaS-DLP_6"                                                                                   | 0 | 0 | 0 | 0 | 1 | 0 | 0 | 0 | 0 | 0 | 0 | 0 |
| 0                                                                                                           | 0 | 0 | 0 | 0 | 0 | 0 | 0 | 0 | 0 | 0 | 0 | 0 |
| 0                                                                                                           | 0 | 0 | 0 | 0 | 0 | 0 | 0 | 0 | 0 | 0 | 0 | 0 |
| 0                                                                                                           | 0 | 0 | 0 | 0 | 0 | 0 | 0 | 0 | 0 | 0 | 1 | 0 |
| 0                                                                                                           | 0 | 0 | 0 | 0 | 0 | 0 | 0 | 0 | 0 | 0 | 0 | 0 |
| 0                                                                                                           | 0 | 0 | 0 | 0 | 0 | 0 | 0 | 0 | 0 |   |   |   |
| "Viruses;Uroviricota;Caudoviricetes;Caudoviricetes__na;Caudoviricetes__na;Caudoviricetes__na;Streptococcus_ |   |   |   |   |   |   |   |   |   |   |   |   |
| phage_CHPC1198"                                                                                             | 0 | 0 | 0 | 0 | 0 | 0 | 0 | 0 | 0 | 0 | 0 | 0 |
| 0                                                                                                           | 0 | 0 | 0 | 0 | 0 | 0 | 0 | 0 | 0 | 0 | 0 | 0 |
| 0                                                                                                           | 0 | 0 | 0 | 0 | 0 | 0 | 0 | 0 | 0 | 0 | 0 | 0 |
| 0                                                                                                           | 0 | 0 | 0 | 0 | 0 | 0 | 0 | 0 | 0 | 0 | 0 | 0 |
| 0                                                                                                           | 0 | 0 | 0 | 1 | 0 | 0 | 0 | 0 | 0 | 0 | 0 | 0 |
| 0                                                                                                           | 0 | 0 | 0 | 0 | 0 | 0 | 0 | 0 |   |   |   |   |
| "Viruses;Uroviricota;Caudoviricetes;Caudoviricetes__na;Caudoviricetes__na;Caudoviricetes__na;Streptococcus_ |   |   |   |   |   |   |   |   |   |   |   |   |
| phage_CHPC926"                                                                                              | 0 | 0 | 1 | 0 | 0 | 0 | 0 | 0 | 0 | 0 | 0 | 0 |
| 0                                                                                                           | 0 | 0 | 0 | 0 | 0 | 0 | 0 | 0 | 0 | 0 | 0 | 0 |
| 0                                                                                                           | 0 | 0 | 0 | 0 | 0 | 0 | 0 | 0 | 0 | 0 | 0 | 0 |
| 0                                                                                                           | 0 | 0 | 0 | 0 | 0 | 0 | 0 | 0 | 0 | 0 | 0 | 0 |
| 0                                                                                                           | 0 | 0 | 0 | 0 | 0 | 0 | 0 | 0 | 0 | 0 | 0 | 0 |
| 0                                                                                                           | 0 | 0 | 0 | 0 | 0 | 0 | 0 | 0 |   |   |   |   |
| "Viruses;Uroviricota;Caudoviricetes;Caudoviricetes__na;Caudoviricetes__na;Caudoviricetes__na;Streptococcus_ |   |   |   |   |   |   |   |   |   |   |   |   |
| phage_Javan191"                                                                                             | 0 | 0 | 0 | 0 | 0 | 0 | 0 | 0 | 0 | 0 | 0 | 0 |
| 0                                                                                                           | 0 | 0 | 0 | 0 | 0 | 0 | 0 | 0 | 0 | 0 | 0 | 0 |
| 0                                                                                                           | 0 | 0 | 0 | 0 | 0 | 0 | 0 | 0 | 0 | 0 | 0 | 0 |
| 1                                                                                                           | 0 | 0 | 0 | 0 | 0 | 0 | 0 | 0 | 0 | 0 | 0 | 0 |
| 0                                                                                                           | 0 | 0 | 0 | 0 | 0 | 0 | 0 | 0 | 0 | 1 | 0 | 0 |
| 0                                                                                                           | 0 | 0 | 0 | 0 | 0 | 0 | 0 | 0 |   |   |   |   |
| "Viruses;Uroviricota;Caudoviricetes;Caudoviricetes__na;Caudoviricetes__na;Caudoviricetes__na;Streptococcus_ |   |   |   |   |   |   |   |   |   |   |   |   |
| phage_SpSL1"                                                                                                | 0 | 0 | 0 | 0 | 0 | 0 | 0 | 0 | 0 | 0 | 0 | 0 |
| 0                                                                                                           | 0 | 0 | 0 | 0 | 0 | 0 | 0 | 0 | 0 | 0 | 0 | 0 |
| 0                                                                                                           | 0 | 0 | 0 | 0 | 0 | 0 | 0 | 0 | 0 | 2 | 0 | 0 |
| 0                                                                                                           | 0 | 0 | 0 | 0 | 0 | 0 | 0 | 0 | 0 | 0 | 0 | 0 |
| 0                                                                                                           | 0 | 0 | 0 | 0 | 0 | 0 | 0 | 0 | 0 | 0 | 0 | 0 |
| 0                                                                                                           | 0 | 0 | 0 | 0 | 0 | 0 | 0 |   |   |   |   |   |
| "Viruses;Uroviricota;Caudoviricetes;Caudoviricetes__na;Caudoviricetes__na;Caudoviricetes__na;Streptomyces_  |   |   |   |   |   |   |   |   |   |   |   |   |
| phage_LibertyBell"                                                                                          | 0 | 0 | 0 | 0 | 0 | 0 | 0 | 0 | 0 | 0 | 0 | 0 |
| 0                                                                                                           | 0 | 0 | 0 | 0 | 0 | 0 | 0 | 0 | 0 | 0 | 0 | 0 |
| 0                                                                                                           | 0 | 0 | 0 | 0 | 0 | 0 | 0 | 0 | 0 | 0 | 0 | 0 |
| 0                                                                                                           | 0 | 0 | 0 | 0 | 0 | 0 | 0 | 0 | 0 | 0 | 0 | 0 |
| 0                                                                                                           | 0 | 0 | 0 | 0 | 0 | 0 | 0 | 0 | 0 | 0 | 0 | 0 |
| 0                                                                                                           | 0 | 0 | 0 | 0 | 0 | 0 | 2 | 0 |   |   |   |   |
| "Viruses;Uroviricota;Caudoviricetes;Caudoviricetes__na;Caudoviricetes__na;Caudoviricetes__na;Sulfitobacter_ |   |   |   |   |   |   |   |   |   |   |   |   |
| phage_phiGT1"                                                                                               | 0 | 0 | 1 | 1 | 0 | 0 | 0 | 0 | 0 | 0 | 0 | 0 |
| 0                                                                                                           | 0 | 0 | 0 | 0 | 0 | 0 | 0 | 0 | 0 | 0 | 0 | 0 |
| 0                                                                                                           | 0 | 0 | 0 | 0 | 0 | 0 | 0 | 0 | 0 | 0 | 0 | 0 |
| 0                                                                                                           | 0 | 0 | 0 | 0 | 0 | 0 | 0 | 0 | 1 | 0 | 0 | 0 |













[illegible]

[illegible]

[illegible]

[illegible]

|                                                                                                           |   |   |    |   |   |   |   |   |   |   |   |   |
|-----------------------------------------------------------------------------------------------------------|---|---|----|---|---|---|---|---|---|---|---|---|
| 0                                                                                                         | 0 | 0 | 0  | 0 | 0 | 0 | 0 | 0 | 0 | 0 | 0 | 0 |
| 0                                                                                                         | 0 | 0 | 0  | 0 | 1 | 0 |   |   |   |   |   |   |
| "Viruses;Uroviricota;Caudoviricetes;Caudoviricetes__na;Caudoviricetes__na;Ceduovirus;Ceduovirus_bIBBL12"  |   |   |    |   |   |   |   |   |   |   |   |   |
| 0                                                                                                         | 0 | 0 | 0  | 0 | 0 | 0 | 0 | 0 | 0 | 0 | 0 | 0 |
| 0                                                                                                         | 0 | 0 | 0  | 0 | 0 | 0 | 0 | 0 | 0 | 0 | 0 | 0 |
| 0                                                                                                         | 0 | 0 | 0  | 0 | 0 | 0 | 0 | 0 | 0 | 0 | 0 | 0 |
| 0                                                                                                         | 0 | 0 | 0  | 0 | 0 | 0 | 0 | 0 | 0 | 0 | 0 | 0 |
| 0                                                                                                         | 0 | 0 | 1  | 0 | 0 | 0 | 0 | 0 | 0 | 0 | 0 | 0 |
| 0                                                                                                         | 0 | 0 | 0  | 0 | 0 | 0 |   |   |   |   |   |   |
| "Viruses;Uroviricota;Caudoviricetes;Caudoviricetes__na;Caudoviricetes__na;Ceduovirus;Ceduovirus_bIBBp64"  |   |   |    |   |   |   |   |   |   |   |   |   |
| 0                                                                                                         | 0 | 0 | 0  | 0 | 0 | 0 | 0 | 0 | 0 | 0 | 0 | 0 |
| 0                                                                                                         | 0 | 0 | 0  | 0 | 0 | 0 | 0 | 0 | 0 | 0 | 0 | 0 |
| 0                                                                                                         | 0 | 0 | 0  | 0 | 0 | 0 | 0 | 0 | 0 | 0 | 0 | 0 |
| 0                                                                                                         | 0 | 0 | 0  | 0 | 0 | 0 | 0 | 0 | 0 | 0 | 0 | 0 |
| 0                                                                                                         | 0 | 8 | 6  | 0 | 0 | 0 | 0 | 0 | 0 | 0 | 0 | 0 |
| 0                                                                                                         | 0 | 0 | 0  | 0 | 1 | 0 |   |   |   |   |   |   |
| "Viruses;Uroviricota;Caudoviricetes;Caudoviricetes__na;Caudoviricetes__na;Ceduovirus;Ceduovirus_bIL67"    |   |   |    |   |   |   |   |   |   |   |   |   |
| 0                                                                                                         | 0 | 0 | 0  | 0 | 0 | 0 | 0 | 0 | 0 | 0 | 0 | 0 |
| 0                                                                                                         | 0 | 0 | 0  | 0 | 0 | 0 | 0 | 0 | 0 | 0 | 0 | 0 |
| 0                                                                                                         | 0 | 0 | 0  | 0 | 0 | 0 | 0 | 0 | 0 | 0 | 0 | 0 |
| 0                                                                                                         | 1 | 0 | 0  | 0 | 0 | 0 | 0 | 0 | 0 | 0 | 0 | 0 |
| 0                                                                                                         | 0 | 0 | 0  | 0 | 0 | 0 | 0 | 0 | 0 | 0 | 0 | 0 |
| 0                                                                                                         | 0 | 0 | 0  | 0 | 0 | 0 |   |   |   |   |   |   |
| "Viruses;Uroviricota;Caudoviricetes;Caudoviricetes__na;Caudoviricetes__na;Ceduovirus;Ceduovirus_bIBB94p4" |   |   |    |   |   |   |   |   |   |   |   |   |
| "                                                                                                         | 0 | 0 | 0  | 0 | 0 | 0 | 0 | 0 | 0 | 0 | 0 | 0 |
|                                                                                                           | 0 | 0 | 0  | 0 | 3 | 0 | 0 | 0 | 0 | 0 | 0 | 0 |
|                                                                                                           | 0 | 0 | 0  | 0 | 0 | 0 | 0 | 0 | 0 | 0 | 0 | 0 |
|                                                                                                           | 0 | 0 | 0  | 0 | 0 | 0 | 0 | 0 | 0 | 0 | 0 | 0 |
|                                                                                                           | 0 | 0 | 0  | 1 | 0 | 0 | 0 | 0 | 0 | 0 | 0 | 0 |
|                                                                                                           | 0 | 0 | 0  | 0 | 0 | 0 |   |   |   |   |   |   |
| "Viruses;Uroviricota;Caudoviricetes;Caudoviricetes__na;Caudoviricetes__na;Ceduovirus;Ceduovirus_c2"       |   |   |    |   |   |   |   |   |   |   |   |   |
| 0                                                                                                         | 0 | 0 | 0  | 0 | 0 | 0 | 0 | 0 | 0 | 0 | 0 | 0 |
|                                                                                                           | 0 | 1 | 0  | 0 | 0 | 0 | 0 | 0 | 0 | 0 | 0 | 0 |
|                                                                                                           | 0 | 0 | 0  | 0 | 0 | 0 | 0 | 0 | 0 | 0 | 0 | 0 |
|                                                                                                           | 0 | 0 | 0  | 0 | 0 | 0 | 0 | 0 | 0 | 4 | 0 | 0 |
|                                                                                                           | 0 | 8 | 11 | 0 | 0 | 0 | 0 | 0 | 0 | 0 | 0 | 0 |
|                                                                                                           | 0 | 0 | 0  | 0 | 0 | 0 |   |   |   |   |   |   |
| "Viruses;Uroviricota;Caudoviricetes;Caudoviricetes__na;Caudoviricetes__na;Ceduovirus;Ceduovirus_CHPC102"  |   |   |    |   |   |   |   |   |   |   |   |   |
| 0"                                                                                                        | 0 | 0 | 0  | 0 | 0 | 0 | 0 | 0 | 0 | 0 | 0 | 0 |
|                                                                                                           | 0 | 0 | 0  | 0 | 0 | 0 | 0 | 0 | 0 | 0 | 0 | 0 |
|                                                                                                           | 0 | 0 | 0  | 0 | 0 | 0 | 0 | 0 | 0 | 0 | 0 | 0 |
|                                                                                                           | 0 | 0 | 0  | 0 | 1 | 0 | 0 | 0 | 0 | 0 | 1 | 0 |
|                                                                                                           | 0 | 0 | 2  | 7 | 0 | 0 | 0 | 0 | 0 | 0 | 0 | 0 |
|                                                                                                           | 0 | 0 | 0  | 0 | 0 | 0 |   |   |   |   |   |   |
| "Viruses;Uroviricota;Caudoviricetes;Caudoviricetes__na;Caudoviricetes__na;Ceduovirus;Ceduovirus_CHPC116"  |   |   |    |   |   |   |   |   |   |   |   |   |
| "                                                                                                         | 0 | 0 | 0  | 0 | 0 | 0 | 0 | 0 | 0 | 0 | 0 | 0 |
|                                                                                                           | 0 | 1 | 0  | 0 | 0 | 0 | 0 | 0 | 0 | 0 | 0 | 0 |
|                                                                                                           | 0 | 0 | 0  | 0 | 0 | 0 | 0 | 0 | 0 | 0 | 0 | 0 |
|                                                                                                           | 0 | 0 | 0  | 0 | 0 | 2 | 0 | 0 | 0 | 0 | 1 | 0 |

|                                                                                                         |   |   |   |   |   |   |   |   |   |   |   |    |   |
|---------------------------------------------------------------------------------------------------------|---|---|---|---|---|---|---|---|---|---|---|----|---|
|                                                                                                         | 0 | 0 | 0 | 4 | 0 | 0 | 0 | 0 | 0 | 0 | 0 | 0  | 0 |
|                                                                                                         | 0 | 0 | 0 | 0 | 0 | 0 | 0 |   |   |   |   |    |   |
| "Viruses;Uroviricota;Caudoviricetes;Caudoviricetes__na;Caudoviricetes__na;Ceduovirus;Ceduovirus_CHPC117 |   |   |   |   |   |   |   |   |   |   |   |    |   |
| 0"                                                                                                      | 0 | 0 | 0 | 0 | 0 | 0 | 0 | 0 | 0 | 0 | 0 | 0  | 0 |
|                                                                                                         | 0 | 0 | 0 | 0 | 0 | 0 | 0 | 0 | 0 | 0 | 0 | 0  | 0 |
|                                                                                                         | 0 | 0 | 0 | 0 | 0 | 0 | 0 | 0 | 0 | 0 | 0 | 0  | 0 |
|                                                                                                         | 0 | 1 | 0 | 0 | 0 | 4 | 3 | 0 | 0 | 2 | 1 | 14 | 0 |
|                                                                                                         | 0 | 0 | 3 | 7 | 0 | 0 | 0 | 0 | 0 | 0 | 0 | 0  | 0 |
|                                                                                                         | 0 | 0 | 0 | 0 | 0 | 0 | 0 |   |   |   |   |    |   |
| "Viruses;Uroviricota;Caudoviricetes;Caudoviricetes__na;Caudoviricetes__na;Ceduovirus;Ceduovirus_CHPC118 |   |   |   |   |   |   |   |   |   |   |   |    |   |
| 2"                                                                                                      | 0 | 0 | 0 | 0 | 0 | 0 | 0 | 0 | 0 | 0 | 0 | 0  | 0 |
|                                                                                                         | 0 | 0 | 0 | 0 | 0 | 0 | 0 | 0 | 0 | 0 | 0 | 0  | 0 |
|                                                                                                         | 0 | 0 | 0 | 0 | 0 | 0 | 0 | 0 | 0 | 0 | 0 | 0  | 0 |
|                                                                                                         | 0 | 0 | 0 | 0 | 0 | 0 | 0 | 0 | 0 | 0 | 0 | 0  | 0 |
|                                                                                                         | 0 | 0 | 0 | 1 | 0 | 0 | 0 | 0 | 0 | 0 | 0 | 0  | 0 |
|                                                                                                         | 0 | 0 | 0 | 0 | 0 | 0 | 0 |   |   |   |   |    |   |
| "Viruses;Uroviricota;Caudoviricetes;Caudoviricetes__na;Caudoviricetes__na;Ceduovirus;Ceduovirus_CHPC118 |   |   |   |   |   |   |   |   |   |   |   |    |   |
| 3"                                                                                                      | 0 | 0 | 0 | 0 | 0 | 0 | 0 | 0 | 0 | 0 | 0 | 0  | 1 |
|                                                                                                         | 0 | 0 | 0 | 0 | 0 | 0 | 0 | 0 | 0 | 0 | 0 | 0  | 0 |
|                                                                                                         | 0 | 0 | 0 | 0 | 0 | 0 | 0 | 0 | 0 | 0 | 0 | 0  | 0 |
|                                                                                                         | 0 | 0 | 0 | 0 | 0 | 0 | 0 | 0 | 0 | 0 | 0 | 0  | 0 |
|                                                                                                         | 0 | 0 | 0 | 0 | 0 | 0 | 0 | 0 | 0 | 0 | 0 | 0  | 0 |
|                                                                                                         | 0 | 0 | 0 | 0 | 0 | 0 | 0 |   |   |   |   |    |   |
| "Viruses;Uroviricota;Caudoviricetes;Caudoviricetes__na;Caudoviricetes__na;Ceduovirus;Ceduovirus_CHPC122 |   |   |   |   |   |   |   |   |   |   |   |    |   |
| "                                                                                                       | 0 | 0 | 0 | 0 | 0 | 0 | 0 | 0 | 0 | 0 | 0 | 0  | 0 |
|                                                                                                         | 0 | 0 | 0 | 0 | 0 | 0 | 0 | 0 | 0 | 0 | 0 | 0  | 0 |
|                                                                                                         | 0 | 0 | 0 | 0 | 0 | 0 | 0 | 0 | 0 | 0 | 0 | 0  | 0 |
|                                                                                                         | 0 | 0 | 0 | 0 | 0 | 0 | 0 | 0 | 0 | 0 | 0 | 1  | 0 |
|                                                                                                         | 0 | 0 | 3 | 2 | 0 | 0 | 0 | 0 | 0 | 0 | 0 | 0  | 0 |
|                                                                                                         | 0 | 0 | 0 | 0 | 0 | 0 | 0 |   |   |   |   |    |   |
| "Viruses;Uroviricota;Caudoviricetes;Caudoviricetes__na;Caudoviricetes__na;Ceduovirus;Ceduovirus_CHPC124 |   |   |   |   |   |   |   |   |   |   |   |    |   |
| 2"                                                                                                      | 0 | 0 | 0 | 0 | 0 | 0 | 0 | 0 | 0 | 0 | 0 | 0  | 0 |
|                                                                                                         | 0 | 0 | 0 | 0 | 0 | 0 | 0 | 0 | 0 | 0 | 0 | 0  | 0 |
|                                                                                                         | 0 | 0 | 0 | 0 | 0 | 0 | 0 | 0 | 0 | 0 | 0 | 0  | 0 |
|                                                                                                         | 0 | 0 | 0 | 0 | 0 | 3 | 0 | 0 | 0 | 3 | 1 | 0  | 1 |
|                                                                                                         | 0 | 0 | 3 | 3 | 0 | 0 | 0 | 0 | 1 | 0 | 0 | 0  | 0 |
|                                                                                                         | 0 | 0 | 0 | 0 | 0 | 0 | 0 |   |   |   |   |    |   |
| "Viruses;Uroviricota;Caudoviricetes;Caudoviricetes__na;Caudoviricetes__na;Ceduovirus;Ceduovirus_CHPC966 |   |   |   |   |   |   |   |   |   |   |   |    |   |
| "                                                                                                       | 0 | 0 | 0 | 0 | 0 | 0 | 0 | 0 | 0 | 0 | 0 | 0  | 0 |
|                                                                                                         | 0 | 0 | 1 | 0 | 0 | 0 | 0 | 0 | 0 | 0 | 0 | 0  | 0 |
|                                                                                                         | 0 | 0 | 0 | 0 | 0 | 0 | 0 | 0 | 0 | 0 | 0 | 0  | 0 |
|                                                                                                         | 0 | 0 | 0 | 0 | 0 | 0 | 0 | 0 | 0 | 0 | 0 | 0  | 0 |
|                                                                                                         | 0 | 0 | 0 | 0 | 0 | 0 | 0 | 0 | 0 | 0 | 0 | 0  | 0 |
|                                                                                                         | 0 | 0 | 0 | 0 | 0 | 0 | 0 |   |   |   |   |    |   |
| "Viruses;Uroviricota;Caudoviricetes;Caudoviricetes__na;Caudoviricetes__na;Ceduovirus;Ceduovirus_CHPC967 |   |   |   |   |   |   |   |   |   |   |   |    |   |
| "                                                                                                       | 0 | 0 | 0 | 0 | 0 | 0 | 0 | 0 | 0 | 0 | 0 | 0  | 0 |
|                                                                                                         | 0 | 0 | 0 | 0 | 0 | 0 | 0 | 0 | 0 | 0 | 0 | 0  | 0 |
|                                                                                                         | 0 | 0 | 0 | 0 | 0 | 0 | 0 | 0 | 0 | 0 | 0 | 0  | 0 |
|                                                                                                         | 0 | 0 | 0 | 0 | 0 | 1 | 0 | 0 | 0 | 0 | 0 | 0  | 0 |

[illegible]

|                                                                                                               |   |   |   |   |   |   |   |   |   |   |   |   |
|---------------------------------------------------------------------------------------------------------------|---|---|---|---|---|---|---|---|---|---|---|---|
|                                                                                                               | 0 | 0 | 0 | 3 | 0 | 0 | 0 | 0 | 0 | 0 | 0 | 0 |
|                                                                                                               | 0 | 0 | 0 | 0 | 0 | 0 | 0 |   |   |   |   |   |
| "Viruses;Uroviricota;Caudoviricetes;Caudoviricetes__na;Caudoviricetes__na;Ceduovirus;Ceduovirus_cv62403"      |   |   |   |   |   |   |   |   |   |   |   |   |
|                                                                                                               | 0 | 0 | 0 | 0 | 0 | 0 | 0 | 0 | 0 | 0 | 0 | 0 |
|                                                                                                               | 0 | 0 | 0 | 0 | 0 | 0 | 0 | 0 | 0 | 0 | 0 | 0 |
|                                                                                                               | 0 | 0 | 0 | 0 | 0 | 0 | 0 | 0 | 0 | 0 | 0 | 0 |
|                                                                                                               | 0 | 0 | 0 | 0 | 0 | 0 | 0 | 0 | 0 | 0 | 0 | 0 |
|                                                                                                               | 0 | 0 | 0 | 2 | 0 | 0 | 0 | 0 | 0 | 0 | 0 | 0 |
|                                                                                                               | 0 | 0 | 0 | 0 | 0 | 0 | 0 |   |   |   |   |   |
| "Viruses;Uroviricota;Caudoviricetes;Caudoviricetes__na;Caudoviricetes__na;Ceduovirus;Ceduovirus_cv62606"      |   |   |   |   |   |   |   |   |   |   |   |   |
|                                                                                                               | 0 | 0 | 0 | 0 | 0 | 0 | 0 | 0 | 0 | 0 | 0 | 1 |
|                                                                                                               | 1 | 1 | 0 | 1 | 0 | 0 | 0 | 0 | 0 | 0 | 0 | 0 |
|                                                                                                               | 0 | 0 | 0 | 0 | 0 | 0 | 0 | 0 | 0 | 0 | 0 | 0 |
|                                                                                                               | 0 | 0 | 0 | 0 | 0 | 0 | 0 | 0 | 0 | 0 | 0 | 0 |
|                                                                                                               | 0 | 0 | 3 | 2 | 0 | 0 | 0 | 0 | 0 | 0 | 0 | 0 |
|                                                                                                               | 0 | 0 | 0 | 0 | 0 | 0 | 0 |   |   |   |   |   |
| "Viruses;Uroviricota;Caudoviricetes;Caudoviricetes__na;Caudoviricetes__na;Ceduovirus;Ceduovirus_D4412"        |   |   |   |   |   |   |   |   |   |   |   |   |
|                                                                                                               | 0 | 0 | 0 | 0 | 0 | 0 | 0 | 0 | 0 | 0 | 0 | 0 |
|                                                                                                               | 0 | 0 | 0 | 0 | 0 | 0 | 0 | 0 | 0 | 0 | 0 | 0 |
|                                                                                                               | 0 | 0 | 0 | 0 | 0 | 0 | 0 | 0 | 0 | 0 | 0 | 0 |
|                                                                                                               | 0 | 0 | 0 | 0 | 0 | 0 | 0 | 0 | 0 | 0 | 0 | 0 |
|                                                                                                               | 0 | 0 | 2 | 0 | 0 | 0 | 0 | 0 | 0 | 0 | 0 | 0 |
|                                                                                                               | 0 | 0 | 0 | 0 | 0 | 0 | 0 |   |   |   |   |   |
| "Viruses;Uroviricota;Caudoviricetes;Caudoviricetes__na;Caudoviricetes__na;Ceduovirus;Ceduovirus_LacS15"       |   |   |   |   |   |   |   |   |   |   |   |   |
|                                                                                                               | 0 | 0 | 0 | 0 | 0 | 0 | 0 | 0 | 0 | 0 | 0 | 0 |
|                                                                                                               | 0 | 0 | 0 | 0 | 0 | 0 | 0 | 0 | 0 | 0 | 0 | 0 |
|                                                                                                               | 0 | 0 | 0 | 0 | 0 | 0 | 0 | 0 | 0 | 0 | 0 | 0 |
|                                                                                                               | 0 | 0 | 0 | 0 | 0 | 5 | 0 | 0 | 0 | 0 | 0 | 0 |
|                                                                                                               | 0 | 0 | 2 | 3 | 0 | 0 | 0 | 0 | 0 | 0 | 0 | 0 |
|                                                                                                               | 0 | 0 | 0 | 0 | 0 | 0 | 0 |   |   |   |   |   |
| "Viruses;Uroviricota;Caudoviricetes;Caudoviricetes__na;Caudoviricetes__na;Ceduovirus;Ceduovirus_M5938"        |   |   |   |   |   |   |   |   |   |   |   |   |
|                                                                                                               | 0 | 0 | 0 | 0 | 0 | 0 | 0 | 0 | 0 | 0 | 0 | 0 |
|                                                                                                               | 0 | 0 | 0 | 0 | 0 | 0 | 0 | 0 | 0 | 0 | 0 | 0 |
|                                                                                                               | 0 | 0 | 0 | 0 | 0 | 0 | 0 | 0 | 0 | 0 | 0 | 0 |
|                                                                                                               | 0 | 0 | 0 | 0 | 0 | 1 | 0 | 0 | 0 | 0 | 0 | 0 |
|                                                                                                               | 0 | 0 | 3 | 1 | 0 | 0 | 1 | 0 | 0 | 0 | 0 | 0 |
|                                                                                                               | 0 | 0 | 0 | 0 | 0 | 0 | 0 |   |   |   |   |   |
| "Viruses;Uroviricota;Caudoviricetes;Caudoviricetes__na;Caudoviricetes__na;Ceduovirus;Ceduovirus_PCB1"         |   |   |   |   |   |   |   |   |   |   |   |   |
|                                                                                                               | 0 | 0 | 0 | 0 | 0 | 0 | 0 | 0 | 0 | 0 | 0 | 0 |
|                                                                                                               | 0 | 1 | 0 | 0 | 2 | 0 | 0 | 0 | 0 | 0 | 0 | 0 |
|                                                                                                               | 0 | 0 | 0 | 0 | 0 | 0 | 0 | 0 | 0 | 0 | 0 | 0 |
|                                                                                                               | 0 | 0 | 0 | 0 | 0 | 0 | 0 | 0 | 0 | 0 | 0 | 0 |
|                                                                                                               | 0 | 0 | 0 | 0 | 0 | 0 | 0 | 0 | 0 | 0 | 0 | 0 |
|                                                                                                               | 0 | 0 | 0 | 0 | 0 | 0 | 0 |   |   |   |   |   |
| "Viruses;Uroviricota;Caudoviricetes;Caudoviricetes__na;Caudoviricetes__na;Ceduovirus;Lactococcus_phage_5205F" |   |   |   |   |   |   |   |   |   |   |   |   |
|                                                                                                               | 0 | 0 | 0 | 0 | 0 | 0 | 0 | 0 | 0 | 0 | 0 | 0 |
|                                                                                                               | 0 | 0 | 0 | 0 | 0 | 0 | 0 | 0 | 0 | 0 | 0 | 0 |
|                                                                                                               | 0 | 0 | 0 | 0 | 0 | 0 | 0 | 0 | 0 | 0 | 0 | 0 |
|                                                                                                               | 0 | 0 | 0 | 0 | 0 | 0 | 1 | 0 | 0 | 0 | 0 | 0 |



[illegible]

[illegible]

[illegible]



|                                                                                                                     |   |   |   |   |    |   |   |    |   |   |   |   |   |
|---------------------------------------------------------------------------------------------------------------------|---|---|---|---|----|---|---|----|---|---|---|---|---|
|                                                                                                                     | 0 | 0 | 0 | 1 | 1  | 0 | 0 | 0  | 0 | 0 | 0 | 0 | 0 |
|                                                                                                                     | 0 | 0 | 0 | 0 | 0  | 0 | 0 |    |   |   |   |   |   |
| "Viruses;Uroviricota;Caudoviricetes;Caudoviricetes__na;Caudoviricetes__na;Emdodecavirus;Emdodecavirus__uc"          | 0 | 0 | 0 | 0 | 0  | 0 | 0 | 0  | 0 | 0 | 0 | 0 | 0 |
|                                                                                                                     | 0 | 0 | 0 | 0 | 0  | 0 | 0 | 0  | 0 | 0 | 0 | 0 | 0 |
|                                                                                                                     | 0 | 0 | 0 | 0 | 0  | 0 | 0 | 0  | 0 | 0 | 0 | 0 | 0 |
|                                                                                                                     | 0 | 0 | 0 | 0 | 0  | 0 | 0 | 0  | 5 | 0 | 0 | 0 | 0 |
|                                                                                                                     | 0 | 0 | 0 | 0 | 0  | 0 | 0 | 0  | 0 | 0 | 0 | 0 | 0 |
|                                                                                                                     | 0 | 0 | 0 | 0 | 0  | 0 | 0 |    |   |   |   |   |   |
| "Viruses;Uroviricota;Caudoviricetes;Caudoviricetes__na;Caudoviricetes__na;Eurybiavirus;Eurybiavirus_PHM2"           | 0 | 0 | 0 | 0 | 1  | 0 | 0 | 0  | 0 | 0 | 0 | 0 | 0 |
|                                                                                                                     | 0 | 0 | 0 | 0 | 0  | 0 | 0 | 0  | 0 | 0 | 0 | 0 | 0 |
|                                                                                                                     | 0 | 0 | 0 | 0 | 0  | 0 | 0 | 0  | 0 | 0 | 0 | 0 | 0 |
|                                                                                                                     | 0 | 0 | 0 | 0 | 0  | 0 | 0 | 0  | 0 | 0 | 0 | 0 | 0 |
|                                                                                                                     | 0 | 0 | 0 | 0 | 0  | 0 | 0 | 0  | 0 | 0 | 0 | 0 | 0 |
|                                                                                                                     | 0 | 0 | 0 | 0 | 0  | 0 | 0 |    |   |   |   |   |   |
| "Viruses;Uroviricota;Caudoviricetes;Caudoviricetes__na;Caudoviricetes__na;Felixounavirus;Felixounavirus__uc"        | 0 | 4 | 0 | 0 | 0  | 0 | 0 | 0  | 0 | 0 | 0 | 0 | 0 |
|                                                                                                                     | 0 | 0 | 0 | 0 | 0  | 0 | 0 | 0  | 0 | 0 | 0 | 0 | 0 |
|                                                                                                                     | 0 | 0 | 0 | 0 | 0  | 0 | 0 | 0  | 0 | 0 | 0 | 0 | 0 |
|                                                                                                                     | 0 | 0 | 0 | 0 | 0  | 0 | 0 | 53 | 0 | 0 | 0 | 0 | 0 |
|                                                                                                                     | 0 | 0 | 0 | 0 | 0  | 0 | 0 | 0  | 0 | 0 | 0 | 0 | 0 |
|                                                                                                                     | 0 | 0 | 0 | 0 | 1  | 0 | 0 |    |   |   |   |   |   |
| "Viruses;Uroviricota;Caudoviricetes;Caudoviricetes__na;Caudoviricetes__na;Feofaniavirus;Feofaniavirus_Eho59"        | 0 | 0 | 1 | 0 | 0  | 0 | 0 | 0  | 0 | 0 | 0 | 0 | 0 |
|                                                                                                                     | 0 | 0 | 0 | 0 | 0  | 0 | 0 | 0  | 0 | 0 | 0 | 0 | 0 |
|                                                                                                                     | 0 | 0 | 0 | 0 | 0  | 0 | 0 | 0  | 0 | 0 | 0 | 0 | 0 |
|                                                                                                                     | 0 | 0 | 0 | 0 | 0  | 0 | 0 | 0  | 0 | 0 | 0 | 0 | 0 |
|                                                                                                                     | 0 | 0 | 0 | 0 | 0  | 0 | 0 | 0  | 0 | 0 | 0 | 0 | 0 |
|                                                                                                                     | 0 | 0 | 0 | 0 | 0  | 0 | 0 |    |   |   |   |   |   |
| "Viruses;Uroviricota;Caudoviricetes;Caudoviricetes__na;Caudoviricetes__na;Ficleduovirus;Ficleduovirus__uc"          | 0 | 0 | 0 | 2 | 2  | 8 | 0 | 0  | 0 | 0 | 0 | 0 | 0 |
|                                                                                                                     | 0 | 0 | 0 | 0 | 0  | 0 | 0 | 0  | 0 | 0 | 0 | 0 | 0 |
|                                                                                                                     | 0 | 0 | 0 | 1 | 0  | 0 | 0 | 0  | 0 | 0 | 0 | 0 | 0 |
|                                                                                                                     | 0 | 0 | 0 | 0 | 0  | 0 | 0 | 0  | 0 | 0 | 0 | 0 | 0 |
|                                                                                                                     | 0 | 0 | 0 | 0 | 0  | 0 | 0 | 0  | 0 | 0 | 0 | 0 | 0 |
|                                                                                                                     | 0 | 0 | 0 | 0 | 0  | 1 | 0 |    |   |   |   |   |   |
| "Viruses;Uroviricota;Caudoviricetes;Caudoviricetes__na;Caudoviricetes__na;Ficleduovirus;Ficleduovirus_FCL2"         | 0 | 0 | 0 | 0 | 1  | 0 | 0 | 0  | 0 | 0 | 0 | 0 | 0 |
|                                                                                                                     | 0 | 0 | 0 | 0 | 0  | 0 | 0 | 0  | 0 | 0 | 0 | 0 | 0 |
|                                                                                                                     | 0 | 0 | 0 | 0 | 0  | 0 | 0 | 0  | 0 | 0 | 0 | 0 | 0 |
|                                                                                                                     | 0 | 0 | 0 | 0 | 0  | 0 | 0 | 0  | 0 | 0 | 0 | 0 | 0 |
|                                                                                                                     | 0 | 0 | 0 | 0 | 0  | 0 | 0 | 0  | 0 | 0 | 0 | 0 | 0 |
|                                                                                                                     | 0 | 0 | 0 | 0 | 0  | 0 | 0 |    |   |   |   |   |   |
| "Viruses;Uroviricota;Caudoviricetes;Caudoviricetes__na;Caudoviricetes__na;Ficleduovirus;Flavobacterium_pha ge_FL-1" | 0 | 0 | 0 | 1 | 94 | 4 | 0 | 0  | 0 | 0 | 0 | 0 | 0 |
|                                                                                                                     | 0 | 0 | 0 | 0 | 0  | 2 | 0 | 0  | 0 | 0 | 0 | 0 | 0 |
|                                                                                                                     | 0 | 1 | 0 | 0 | 0  | 0 | 0 | 0  | 0 | 0 | 0 | 0 | 0 |
|                                                                                                                     | 0 | 0 | 0 | 0 | 0  | 0 | 0 | 0  | 0 | 2 | 0 | 0 | 0 |





|                                                                                                               |   |   |   |   |    |    |    |    |   |   |   |   |
|---------------------------------------------------------------------------------------------------------------|---|---|---|---|----|----|----|----|---|---|---|---|
|                                                                                                               | 0 | 0 | 0 | 0 | 0  | 0  | 0  | 0  | 0 | 0 | 0 | 0 |
|                                                                                                               | 0 | 0 | 0 | 0 | 0  | 0  | 0  |    |   |   |   |   |
| "Viruses;Uroviricota;Caudoviricetes;Caudoviricetes__na;Caudoviricetes__na;Godonkavirus;Godonkavirus_god       |   |   |   |   |    |    |    |    |   |   |   |   |
| onK"                                                                                                          | 0 | 0 | 0 | 1 | 0  | 6  | 0  | 0  | 0 | 0 | 0 | 0 |
|                                                                                                               | 0 | 0 | 0 | 0 | 0  | 0  | 0  | 0  | 0 | 0 | 0 | 0 |
|                                                                                                               | 0 | 0 | 0 | 0 | 0  | 0  | 0  | 0  | 0 | 0 | 0 | 0 |
|                                                                                                               | 0 | 0 | 0 | 0 | 0  | 0  | 0  | 0  | 0 | 0 | 0 | 0 |
|                                                                                                               | 0 | 0 | 0 | 0 | 0  | 0  | 0  | 0  | 0 | 0 | 0 | 0 |
|                                                                                                               | 0 | 0 | 0 | 0 | 0  | 0  | 0  | 0  | 0 | 0 | 0 | 0 |
|                                                                                                               | 0 | 0 | 0 | 0 | 0  | 0  | 0  |    |   |   |   |   |
| "Viruses;Uroviricota;Caudoviricetes;Caudoviricetes__na;Caudoviricetes__na;Gordonvirus;Gordonvirus__uc"        |   |   |   |   |    |    |    |    |   |   |   |   |
|                                                                                                               | 0 | 0 | 0 | 0 | 9  | 0  | 0  | 0  | 0 | 0 | 0 | 0 |
|                                                                                                               | 0 | 0 | 0 | 0 | 0  | 0  | 0  | 0  | 0 | 0 | 0 | 1 |
|                                                                                                               | 0 | 0 | 0 | 0 | 0  | 0  | 0  | 0  | 0 | 0 | 0 | 0 |
|                                                                                                               | 0 | 0 | 0 | 0 | 0  | 0  | 0  | 0  | 0 | 0 | 0 | 0 |
|                                                                                                               | 1 | 0 | 0 | 0 | 0  | 0  | 0  | 0  | 0 | 0 | 0 | 0 |
|                                                                                                               | 0 | 0 | 0 | 0 | 0  | 0  | 0  |    |   |   |   |   |
| "Viruses;Uroviricota;Caudoviricetes;Caudoviricetes__na;Caudoviricetes__na;Harrisonburgvirus;Harrisonburgvi    |   |   |   |   |    |    |    |    |   |   |   |   |
| rus_persinger"                                                                                                | 0 | 0 | 0 | 0 | 0  | 0  | 2  | 0  | 0 | 0 | 0 | 0 |
|                                                                                                               | 0 | 0 | 0 | 0 | 0  | 0  | 0  | 0  | 0 | 1 | 0 | 0 |
|                                                                                                               | 0 | 0 | 0 | 0 | 0  | 0  | 0  | 0  | 0 | 0 | 0 | 0 |
|                                                                                                               | 0 | 0 | 0 | 0 | 0  | 0  | 0  | 0  | 0 | 0 | 0 | 0 |
|                                                                                                               | 0 | 0 | 0 | 0 | 0  | 0  | 0  | 0  | 0 | 0 | 0 | 0 |
|                                                                                                               | 0 | 0 | 0 | 0 | 0  | 0  | 0  | 0  | 0 | 0 | 0 | 0 |
|                                                                                                               | 0 | 0 | 0 | 0 | 0  | 0  | 0  |    |   |   |   |   |
| "Viruses;Uroviricota;Caudoviricetes;Caudoviricetes__na;Caudoviricetes__na;Hattifnattvirus;Hattifnattvirus_hat |   |   |   |   |    |    |    |    |   |   |   |   |
| tifnatt"                                                                                                      | 0 | 0 | 0 | 0 | 0  | 0  | 0  | 0  | 0 | 0 | 0 | 0 |
|                                                                                                               | 0 | 0 | 0 | 0 | 0  | 0  | 0  | 0  | 0 | 0 | 0 | 0 |
|                                                                                                               | 0 | 0 | 0 | 0 | 0  | 0  | 0  | 0  | 0 | 0 | 0 | 0 |
|                                                                                                               | 0 | 0 | 0 | 0 | 0  | 1  | 0  | 0  | 0 | 0 | 0 | 0 |
|                                                                                                               | 0 | 0 | 0 | 0 | 0  | 0  | 0  | 0  | 0 | 0 | 0 | 0 |
|                                                                                                               | 0 | 0 | 0 | 0 | 0  | 1  | 0  |    |   |   |   |   |
| "Viruses;Uroviricota;Caudoviricetes;Caudoviricetes__na;Caudoviricetes__na;Helsingorvirus;Helsingorvirus_Cb    |   |   |   |   |    |    |    |    |   |   |   |   |
| a181"                                                                                                         | 0 | 0 | 1 | 1 | 0  | 0  | 0  | 0  | 0 | 0 | 0 | 0 |
|                                                                                                               | 0 | 0 | 0 | 0 | 0  | 0  | 0  | 0  | 0 | 0 | 0 | 0 |
|                                                                                                               | 0 | 0 | 0 | 0 | 0  | 0  | 0  | 0  | 0 | 0 | 0 | 0 |
|                                                                                                               | 0 | 0 | 0 | 0 | 0  | 0  | 0  | 0  | 0 | 0 | 0 | 0 |
|                                                                                                               | 0 | 0 | 0 | 0 | 0  | 0  | 0  | 0  | 0 | 0 | 0 | 0 |
|                                                                                                               | 0 | 0 | 0 | 0 | 0  | 0  | 0  |    |   |   |   |   |
| "Viruses;Uroviricota;Caudoviricetes;Caudoviricetes__na;Caudoviricetes__na;Immutovirus;Immutovirus__uc"        |   |   |   |   |    |    |    |    |   |   |   |   |
|                                                                                                               | 0 | 1 | 1 | 7 | 99 | 17 | 0  | 0  | 0 | 0 | 0 | 0 |
|                                                                                                               | 0 | 0 | 2 | 0 | 0  | 0  | 0  | 0  | 0 | 0 | 0 | 0 |
|                                                                                                               | 0 | 0 | 0 | 0 | 0  | 0  | 0  | 0  | 3 | 0 | 0 | 0 |
|                                                                                                               | 0 | 0 | 0 | 0 | 0  | 0  | 0  | 12 | 0 | 0 | 0 | 0 |
|                                                                                                               | 0 | 0 | 0 | 0 | 0  | 0  | 45 | 0  | 0 | 0 | 0 | 0 |
|                                                                                                               | 0 | 0 | 0 | 0 | 0  | 3  | 0  |    |   |   |   |   |
| "Viruses;Uroviricota;Caudoviricetes;Caudoviricetes__na;Caudoviricetes__na;Immutovirus;Immutovirus__immut      |   |   |   |   |    |    |    |    |   |   |   |   |
| o"                                                                                                            | 0 | 1 | 0 | 3 | 7  | 10 | 0  | 0  | 0 | 0 | 0 | 0 |
|                                                                                                               | 0 | 0 | 0 | 0 | 0  | 0  | 0  | 0  | 0 | 1 | 0 | 0 |
|                                                                                                               | 0 | 0 | 0 | 0 | 0  | 0  | 0  | 0  | 0 | 0 | 0 | 0 |
|                                                                                                               | 0 | 0 | 0 | 0 | 0  | 0  | 0  | 4  | 0 | 0 | 0 | 0 |



[illegible]

[illegible]

|                                                                                                                 |   |   |    |   |   |   |   |    |    |   |   |   |
|-----------------------------------------------------------------------------------------------------------------|---|---|----|---|---|---|---|----|----|---|---|---|
|                                                                                                                 | 0 | 0 | 0  | 0 | 0 | 0 | 0 | 0  | 0  | 0 | 0 | 0 |
|                                                                                                                 | 0 | 0 | 0  | 0 | 0 | 0 | 0 | 0  |    |   |   |   |
| "Viruses;Uroviricota;Caudoviricetes;Caudoviricetes__na;Caudoviricetes__na;Kelquatrovirus;Kelquatrovirus_KL4"    | 0 | 0 | 0  | 1 | 0 | 0 | 0 | 0  | 0  | 0 | 0 | 0 |
|                                                                                                                 | 0 | 0 | 0  | 0 | 0 | 0 | 0 | 0  | 0  | 0 | 0 | 0 |
|                                                                                                                 | 0 | 0 | 0  | 0 | 0 | 0 | 0 | 0  | 0  | 0 | 0 | 0 |
|                                                                                                                 | 0 | 0 | 0  | 0 | 0 | 0 | 0 | 0  | 0  | 0 | 0 | 0 |
|                                                                                                                 | 0 | 0 | 0  | 0 | 0 | 0 | 0 | 0  | 0  | 0 | 0 | 0 |
|                                                                                                                 | 0 | 0 | 0  | 0 | 0 | 0 | 0 |    |    |   |   |   |
| "Viruses;Uroviricota;Caudoviricetes;Caudoviricetes__na;Caudoviricetes__na;Kenoshavirus;Kenoshavirus_ohmyward"   | 0 | 0 | 0  | 0 | 4 | 0 | 0 | 0  | 0  | 0 | 0 | 0 |
|                                                                                                                 | 0 | 0 | 0  | 0 | 0 | 0 | 0 | 0  | 0  | 0 | 0 | 0 |
|                                                                                                                 | 0 | 0 | 0  | 0 | 0 | 0 | 0 | 0  | 0  | 0 | 0 | 0 |
|                                                                                                                 | 0 | 0 | 0  | 0 | 0 | 0 | 0 | 0  | 0  | 0 | 0 | 0 |
|                                                                                                                 | 0 | 0 | 0  | 0 | 0 | 0 | 0 | 0  | 0  | 0 | 0 | 0 |
|                                                                                                                 | 0 | 0 | 0  | 0 | 0 | 0 | 0 |    |    |   |   |   |
| "Viruses;Uroviricota;Caudoviricetes;Caudoviricetes__na;Caudoviricetes__na;Kilunavirus;Kilunavirus_KL1"          | 0 | 0 | 0  | 0 | 0 | 2 | 0 | 0  | 0  | 0 | 0 | 0 |
|                                                                                                                 | 0 | 0 | 0  | 0 | 0 | 0 | 0 | 0  | 0  | 0 | 0 | 0 |
|                                                                                                                 | 0 | 0 | 0  | 0 | 0 | 0 | 0 | 0  | 0  | 0 | 0 | 0 |
|                                                                                                                 | 0 | 0 | 0  | 0 | 0 | 0 | 0 | 0  | 0  | 0 | 0 | 0 |
|                                                                                                                 | 0 | 0 | 0  | 0 | 0 | 0 | 0 | 0  | 0  | 0 | 0 | 0 |
|                                                                                                                 | 0 | 0 | 0  | 0 | 0 | 0 | 0 |    |    |   |   |   |
| "Viruses;Uroviricota;Caudoviricetes;Caudoviricetes__na;Caudoviricetes__na;Kleczkowskavirus;Kleczkowskavirus_uc" | 0 | 1 | 0  | 1 | 0 | 0 | 0 | 0  | 0  | 0 | 0 | 0 |
|                                                                                                                 | 0 | 0 | 0  | 0 | 0 | 0 | 0 | 0  | 0  | 0 | 0 | 0 |
|                                                                                                                 | 0 | 0 | 0  | 0 | 0 | 0 | 0 | 0  | 0  | 0 | 0 | 0 |
|                                                                                                                 | 0 | 0 | 0  | 0 | 0 | 0 | 0 | 0  | 0  | 0 | 0 | 0 |
|                                                                                                                 | 0 | 0 | 0  | 0 | 0 | 0 | 0 | 0  | 0  | 0 | 0 | 0 |
|                                                                                                                 | 0 | 0 | 0  | 0 | 0 | 0 | 0 |    |    |   |   |   |
| "Viruses;Uroviricota;Caudoviricetes;Caudoviricetes__na;Caudoviricetes__na;Kolesnikvirus;Erwinia_phage_phiEa116" | 0 | 0 | 0  | 0 | 0 | 0 | 0 | 0  | 0  | 0 | 0 | 0 |
|                                                                                                                 | 0 | 0 | 0  | 0 | 0 | 0 | 0 | 0  | 0  | 0 | 0 | 0 |
|                                                                                                                 | 0 | 0 | 0  | 0 | 0 | 0 | 0 | 0  | 0  | 0 | 0 | 0 |
|                                                                                                                 | 0 | 0 | 1  | 0 | 0 | 0 | 0 | 0  | 0  | 0 | 0 | 0 |
|                                                                                                                 | 0 | 0 | 0  | 0 | 0 | 0 | 0 | 0  | 0  | 0 | 0 | 0 |
|                                                                                                                 | 0 | 0 | 0  | 0 | 0 | 0 | 0 |    |    |   |   |   |
| "Viruses;Uroviricota;Caudoviricetes;Caudoviricetes__na;Caudoviricetes__na;Kolesnikvirus;Erwinia_phage_Roschal"  | 0 | 0 | 0  | 0 | 0 | 0 | 0 | 0  | 0  | 0 | 0 | 0 |
|                                                                                                                 | 0 | 0 | 0  | 0 | 0 | 0 | 0 | 0  | 0  | 0 | 0 | 0 |
|                                                                                                                 | 0 | 0 | 0  | 0 | 0 | 0 | 0 | 0  | 1  | 0 | 0 | 0 |
|                                                                                                                 | 0 | 0 | 2  | 0 | 0 | 0 | 0 | 0  | 0  | 0 | 0 | 0 |
|                                                                                                                 | 0 | 0 | 0  | 0 | 0 | 0 | 0 | 0  | 0  | 0 | 0 | 0 |
|                                                                                                                 | 0 | 0 | 0  | 0 | 0 | 0 | 0 |    |    |   |   |   |
| "Viruses;Uroviricota;Caudoviricetes;Caudoviricetes__na;Caudoviricetes__na;Kolesnikvirus;Kolesnikvirus_uc"       | 0 | 0 | 5  | 0 | 0 | 0 | 0 | 0  | 0  | 0 | 0 | 0 |
|                                                                                                                 | 0 | 0 | 0  | 0 | 0 | 0 | 0 | 0  | 0  | 0 | 0 | 0 |
|                                                                                                                 | 1 | 0 | 0  | 0 | 0 | 0 | 0 | 0  | 36 | 0 | 0 | 0 |
|                                                                                                                 | 0 | 0 | 40 | 0 | 0 | 0 | 0 | 33 | 0  | 0 | 0 | 0 |

[illegible]

|                                                                                                                       |   |   |   |   |    |   |   |    |   |   |   |   |
|-----------------------------------------------------------------------------------------------------------------------|---|---|---|---|----|---|---|----|---|---|---|---|
|                                                                                                                       | 0 | 0 | 0 | 0 | 0  | 0 | 0 | 0  | 0 | 0 | 0 | 0 |
|                                                                                                                       | 0 | 0 | 0 | 0 | 0  | 0 | 0 |    |   |   |   |   |
| "Viruses;Uroviricota;Caudoviricetes;Caudoviricetes__na;Caudoviricetes__na;Kuravirus;Kuravirus__uc"                    | 0 |   |   |   |    |   |   |    |   |   |   |   |
|                                                                                                                       | 0 | 0 | 0 | 0 | 0  | 0 | 0 | 0  | 0 | 0 | 0 | 0 |
|                                                                                                                       | 0 | 0 | 0 | 0 | 0  | 0 | 0 | 0  | 0 | 0 | 0 | 0 |
|                                                                                                                       | 0 | 0 | 0 | 0 | 0  | 0 | 0 | 0  | 0 | 0 | 0 | 0 |
|                                                                                                                       | 0 | 0 | 0 | 0 | 1  | 0 | 0 | 0  | 0 | 0 | 0 | 0 |
|                                                                                                                       | 0 | 0 | 0 | 0 | 0  | 0 | 0 | 0  | 0 | 0 | 0 | 0 |
|                                                                                                                       | 0 | 0 | 0 | 0 | 0  | 0 |   |    |   |   |   |   |
| "Viruses;Uroviricota;Caudoviricetes;Caudoviricetes__na;Caudoviricetes__na;Lacusarxvirus;Lacusarxvirus_lacus<br>arx"   | 0 | 0 | 0 | 0 | 1  | 0 | 0 | 0  | 0 | 0 | 0 | 0 |
|                                                                                                                       | 0 | 0 | 0 | 0 | 0  | 0 | 0 | 0  | 0 | 0 | 0 | 0 |
|                                                                                                                       | 0 | 0 | 0 | 0 | 0  | 0 | 0 | 0  | 0 | 0 | 0 | 0 |
|                                                                                                                       | 0 | 0 | 0 | 0 | 0  | 0 | 0 | 1  | 0 | 0 | 0 | 0 |
|                                                                                                                       | 0 | 0 | 0 | 0 | 0  | 0 | 0 | 0  | 0 | 0 | 0 | 0 |
|                                                                                                                       | 0 | 0 | 0 | 0 | 0  | 0 | 0 |    |   |   |   |   |
| "Viruses;Uroviricota;Caudoviricetes;Caudoviricetes__na;Caudoviricetes__na;Lahexavirus;Lahexavirus__uc"                | 0 | 0 | 0 | 0 | 27 | 5 | 0 | 0  | 0 | 0 | 0 | 0 |
|                                                                                                                       | 0 | 0 | 0 | 0 | 0  | 0 | 0 | 0  | 0 | 0 | 0 | 0 |
|                                                                                                                       | 0 | 0 | 0 | 0 | 0  | 0 | 0 | 0  | 2 | 0 | 0 | 0 |
|                                                                                                                       | 0 | 0 | 0 | 0 | 0  | 0 | 0 | 0  | 0 | 0 | 0 | 0 |
|                                                                                                                       | 0 | 0 | 0 | 0 | 0  | 0 | 0 | 0  | 0 | 0 | 0 | 0 |
|                                                                                                                       | 0 | 0 | 0 | 0 | 0  | 0 | 0 |    |   |   |   |   |
| "Viruses;Uroviricota;Caudoviricetes;Caudoviricetes__na;Caudoviricetes__na;Lambdavirus;Enterobacteria_phag<br>e_LC159" | 0 | 0 | 0 | 0 | 0  | 0 | 0 | 0  | 0 | 0 | 0 | 0 |
|                                                                                                                       | 0 | 0 | 0 | 0 | 0  | 0 | 0 | 0  | 0 | 0 | 0 | 0 |
|                                                                                                                       | 0 | 0 | 0 | 0 | 0  | 0 | 0 | 0  | 0 | 0 | 0 | 0 |
|                                                                                                                       | 0 | 0 | 0 | 0 | 0  | 0 | 0 | 16 | 0 | 0 | 0 | 0 |
|                                                                                                                       | 0 | 0 | 0 | 0 | 0  | 0 | 0 | 0  | 0 | 0 | 0 | 0 |
|                                                                                                                       | 0 | 0 | 0 | 0 | 0  | 0 | 0 |    |   |   |   |   |
| "Viruses;Uroviricota;Caudoviricetes;Caudoviricetes__na;Caudoviricetes__na;Lambdavirus;Lambdavirus_lambd<br>a"         | 0 | 0 | 0 | 0 | 0  | 0 | 0 | 0  | 0 | 0 | 0 | 0 |
|                                                                                                                       | 0 | 0 | 0 | 0 | 0  | 0 | 0 | 0  | 0 | 0 | 0 | 0 |
|                                                                                                                       | 0 | 0 | 0 | 0 | 0  | 1 | 0 | 0  | 0 | 0 | 0 | 0 |
|                                                                                                                       | 0 | 0 | 0 | 0 | 0  | 0 | 0 | 0  | 0 | 0 | 0 | 0 |
|                                                                                                                       | 0 | 0 | 0 | 0 | 0  | 0 | 0 | 0  | 0 | 0 | 0 | 0 |
|                                                                                                                       | 0 | 0 | 0 | 0 | 0  | 0 | 0 |    |   |   |   |   |
| "Viruses;Uroviricota;Caudoviricetes;Caudoviricetes__na;Caudoviricetes__na;Leonardvirus;Leonardvirus__uc"              | 0 | 0 | 0 | 1 | 0  | 0 | 0 | 0  | 0 | 0 | 0 | 0 |
|                                                                                                                       | 0 | 0 | 0 | 0 | 0  | 0 | 0 | 0  | 0 | 0 | 0 | 0 |
|                                                                                                                       | 0 | 0 | 0 | 0 | 0  | 0 | 0 | 0  | 0 | 0 | 0 | 0 |
|                                                                                                                       | 0 | 0 | 0 | 0 | 0  | 0 | 0 | 0  | 0 | 0 | 0 | 0 |
|                                                                                                                       | 0 | 0 | 0 | 0 | 0  | 0 | 0 | 0  | 0 | 0 | 0 | 0 |
|                                                                                                                       | 0 | 0 | 0 | 0 | 0  | 0 | 0 |    |   |   |   |   |
| "Viruses;Uroviricota;Caudoviricetes;Caudoviricetes__na;Caudoviricetes__na;Lessievirus;Burkholderia_phage_C<br>SP3"    | 0 | 0 | 0 | 5 | 50 | 4 | 0 | 0  | 0 | 0 | 0 | 0 |
|                                                                                                                       | 0 | 0 | 0 | 0 | 0  | 0 | 0 | 0  | 0 | 0 | 0 | 0 |
|                                                                                                                       | 0 | 0 | 0 | 0 | 0  | 0 | 0 | 0  | 0 | 0 | 0 | 0 |
|                                                                                                                       | 0 | 0 | 0 | 0 | 0  | 0 | 0 | 0  | 2 | 0 | 0 | 0 |

[illegible]

[illegible]

[illegible]



[illegible]

|                                                                                                                  |   |   |   |    |    |    |   |   |   |   |   |   |
|------------------------------------------------------------------------------------------------------------------|---|---|---|----|----|----|---|---|---|---|---|---|
| 0                                                                                                                | 0 | 0 | 0 | 0  | 0  | 0  | 0 | 0 | 0 | 0 | 0 | 0 |
| 0                                                                                                                | 0 | 0 | 0 | 0  | 0  | 0  | 0 |   |   |   |   |   |
| "Viruses;Uroviricota;Caudoviricetes;Caudoviricetes__na;Caudoviricetes__na;Mooglevirus;Mooglevirus__uc"           |   |   |   |    |    |    |   |   |   |   |   |   |
| 0                                                                                                                | 0 | 0 | 2 | 0  | 0  | 0  | 0 | 0 | 0 | 0 | 0 | 0 |
| 0                                                                                                                | 0 | 0 | 0 | 0  | 0  | 0  | 0 | 0 | 0 | 0 | 0 | 0 |
| 0                                                                                                                | 0 | 0 | 0 | 0  | 0  | 0  | 0 | 0 | 0 | 0 | 0 | 0 |
| 0                                                                                                                | 0 | 0 | 0 | 0  | 0  | 0  | 0 | 0 | 0 | 0 | 0 | 0 |
| 0                                                                                                                | 0 | 0 | 0 | 0  | 0  | 0  | 0 | 0 | 0 | 0 | 0 | 0 |
| 0                                                                                                                | 0 | 0 | 0 | 0  | 0  | 0  |   |   |   |   |   |   |
| "Viruses;Uroviricota;Caudoviricetes;Caudoviricetes__na;Caudoviricetes__na;Mudcatvirus;Arthrobacter_phage_Correa" |   |   |   |    |    |    |   |   |   |   |   |   |
| 0                                                                                                                | 0 | 0 | 0 | 0  | 1  | 0  | 0 | 0 | 0 | 0 | 0 | 0 |
| 0                                                                                                                | 0 | 0 | 0 | 0  | 0  | 0  | 0 | 0 | 0 | 0 | 0 | 0 |
| 0                                                                                                                | 0 | 0 | 0 | 0  | 0  | 0  | 0 | 0 | 0 | 0 | 0 | 0 |
| 0                                                                                                                | 0 | 0 | 0 | 0  | 0  | 0  | 0 | 0 | 0 | 0 | 0 | 0 |
| 0                                                                                                                | 0 | 0 | 0 | 0  | 0  | 0  | 0 | 0 | 0 | 0 | 0 | 0 |
| 0                                                                                                                | 0 | 0 | 0 | 0  | 0  | 0  |   |   |   |   |   |   |
| "Viruses;Uroviricota;Caudoviricetes;Caudoviricetes__na;Caudoviricetes__na;Muminvirus;Muminvirus__uc"             |   |   |   |    |    |    |   |   |   |   |   |   |
| 0                                                                                                                | 0 | 1 | 1 | 14 | 0  | 0  | 0 | 0 | 0 | 0 | 0 | 0 |
| 0                                                                                                                | 0 | 0 | 1 | 1  | 0  | 0  | 0 | 0 | 0 | 1 | 0 | 0 |
| 0                                                                                                                | 0 | 0 | 0 | 0  | 0  | 0  | 0 | 0 | 0 | 0 | 0 | 0 |
| 0                                                                                                                | 0 | 0 | 0 | 0  | 0  | 0  | 0 | 0 | 0 | 0 | 0 | 0 |
| 0                                                                                                                | 0 | 0 | 0 | 0  | 0  | 0  | 0 | 0 | 0 | 0 | 0 | 0 |
| 0                                                                                                                | 0 | 0 | 0 | 0  | 0  | 0  |   |   |   |   |   |   |
| "Viruses;Uroviricota;Caudoviricetes;Caudoviricetes__na;Caudoviricetes__na;Muminvirus;Muminvirus_filifjonk"       |   |   |   |    |    |    |   |   |   |   |   |   |
| "                                                                                                                | 0 | 0 | 0 | 1  | 38 | 16 | 0 | 0 | 0 | 0 | 0 | 0 |
| 0                                                                                                                | 0 | 0 | 0 | 0  | 0  | 0  | 0 | 0 | 0 | 0 | 0 | 0 |
| 0                                                                                                                | 0 | 0 | 0 | 0  | 0  | 0  | 0 | 0 | 0 | 0 | 0 | 0 |
| 0                                                                                                                | 0 | 0 | 0 | 0  | 0  | 0  | 0 | 0 | 0 | 0 | 0 | 0 |
| 0                                                                                                                | 0 | 0 | 0 | 0  | 0  | 0  | 0 | 0 | 0 | 0 | 0 | 0 |
| 0                                                                                                                | 0 | 0 | 0 | 0  | 0  | 0  |   |   |   |   |   |   |
| "Viruses;Uroviricota;Caudoviricetes;Caudoviricetes__na;Caudoviricetes__na;Muminvirus;Muminvirus_mymlan"          |   |   |   |    |    |    |   |   |   |   |   |   |
| "                                                                                                                | 0 | 0 | 0 | 2  | 18 | 0  | 0 | 0 | 0 | 0 | 0 | 0 |
| 0                                                                                                                | 0 | 0 | 0 | 0  | 0  | 0  | 0 | 0 | 0 | 0 | 0 | 0 |
| 0                                                                                                                | 0 | 0 | 0 | 0  | 0  | 0  | 0 | 0 | 0 | 0 | 0 | 0 |
| 0                                                                                                                | 0 | 0 | 0 | 0  | 0  | 0  | 0 | 0 | 0 | 0 | 0 | 0 |
| 0                                                                                                                | 0 | 0 | 0 | 0  | 0  | 0  | 0 | 0 | 0 | 0 | 0 | 0 |
| 0                                                                                                                | 0 | 0 | 0 | 0  | 0  | 0  |   |   |   |   |   |   |
| "Viruses;Uroviricota;Caudoviricetes;Caudoviricetes__na;Caudoviricetes__na;Muminvirus;Muminvirus_snusmu"          |   |   |   |    |    |    |   |   |   |   |   |   |
| m"                                                                                                               | 0 | 0 | 0 | 1  | 0  | 0  | 0 | 0 | 0 | 0 | 0 | 0 |
| 0                                                                                                                | 0 | 0 | 0 | 0  | 0  | 0  | 0 | 0 | 0 | 0 | 0 | 0 |
| 0                                                                                                                | 0 | 0 | 0 | 0  | 0  | 0  | 0 | 0 | 0 | 0 | 0 | 0 |
| 0                                                                                                                | 0 | 0 | 0 | 0  | 0  | 0  | 0 | 0 | 0 | 0 | 0 | 0 |
| 0                                                                                                                | 0 | 0 | 0 | 0  | 0  | 0  | 0 | 0 | 0 | 0 | 0 | 0 |
| 0                                                                                                                | 0 | 0 | 0 | 0  | 0  | 0  |   |   |   |   |   |   |
| "Viruses;Uroviricota;Caudoviricetes;Caudoviricetes__na;Caudoviricetes__na;Muminvirus;Muminvirus_tooticki"        |   |   |   |    |    |    |   |   |   |   |   |   |
| 0                                                                                                                | 0 | 2 | 0 | 1  | 1  | 0  | 0 | 0 | 0 | 0 | 0 | 0 |
| 0                                                                                                                | 0 | 0 | 2 | 0  | 0  | 0  | 0 | 0 | 0 | 0 | 0 | 0 |
| 0                                                                                                                | 0 | 0 | 0 | 0  | 0  | 0  | 0 | 0 | 0 | 0 | 0 | 0 |
| 0                                                                                                                | 0 | 0 | 0 | 0  | 0  | 0  | 0 | 2 | 0 | 0 | 0 | 0 |

[illegible]

[illegible]

|                                                                                                                   |   |   |   |   |   |    |   |   |   |   |   |   |   |
|-------------------------------------------------------------------------------------------------------------------|---|---|---|---|---|----|---|---|---|---|---|---|---|
|                                                                                                                   | 0 | 0 | 0 | 0 | 0 | 0  | 0 | 0 | 0 | 0 | 0 | 0 | 0 |
|                                                                                                                   | 0 | 0 | 0 | 0 | 0 | 0  | 0 | 0 |   |   |   |   |   |
| "Viruses;Uroviricota;Caudoviricetes;Caudoviricetes__na;Caudoviricetes__na;Oengusvirus;Oengusvirus_oengus"         |   |   |   |   |   |    |   |   |   |   |   |   |   |
| "                                                                                                                 | 0 | 0 | 0 | 0 | 0 | 0  | 0 | 0 | 0 | 0 | 0 | 0 | 0 |
|                                                                                                                   | 0 | 0 | 0 | 0 | 0 | 0  | 0 | 0 | 0 | 0 | 0 | 5 | 9 |
|                                                                                                                   | 0 | 0 | 0 | 0 | 0 | 0  | 0 | 0 | 0 | 0 | 0 | 0 | 0 |
|                                                                                                                   | 0 | 0 | 0 | 0 | 0 | 0  | 0 | 0 | 0 | 0 | 0 | 0 | 0 |
|                                                                                                                   | 0 | 0 | 0 | 1 | 0 | 0  | 0 | 0 | 0 | 0 | 0 | 0 | 0 |
|                                                                                                                   | 0 | 0 | 0 | 0 | 0 | 0  | 0 |   |   |   |   |   |   |
| "Viruses;Uroviricota;Caudoviricetes;Caudoviricetes__na;Caudoviricetes__na;Omegavirus;Omegavirus__uc"              |   |   |   |   |   |    |   |   |   |   |   |   |   |
|                                                                                                                   | 0 | 0 | 0 | 0 | 1 | 0  | 0 | 0 | 0 | 0 | 0 | 0 | 0 |
|                                                                                                                   | 0 | 0 | 0 | 0 | 0 | 0  | 0 | 0 | 0 | 0 | 0 | 0 | 0 |
|                                                                                                                   | 0 | 0 | 0 | 0 | 0 | 0  | 0 | 0 | 0 | 0 | 0 | 0 | 0 |
|                                                                                                                   | 0 | 0 | 0 | 0 | 0 | 0  | 0 | 0 | 0 | 0 | 0 | 0 | 0 |
|                                                                                                                   | 0 | 0 | 0 | 0 | 0 | 0  | 0 | 0 | 0 | 0 | 0 | 0 | 0 |
|                                                                                                                   | 0 | 0 | 0 | 0 | 0 | 0  | 0 |   |   |   |   |   |   |
| "Viruses;Uroviricota;Caudoviricetes;Caudoviricetes__na;Caudoviricetes__na;Oneupvirus;Oneupvirus_oneup"            |   |   |   |   |   |    |   |   |   |   |   |   |   |
|                                                                                                                   | 0 | 0 | 0 | 0 | 0 | 1  | 0 | 0 | 0 | 0 | 0 | 0 | 0 |
|                                                                                                                   | 0 | 0 | 0 | 0 | 0 | 0  | 0 | 0 | 0 | 0 | 0 | 0 | 0 |
|                                                                                                                   | 0 | 0 | 0 | 0 | 0 | 0  | 0 | 0 | 0 | 0 | 0 | 0 | 0 |
|                                                                                                                   | 0 | 0 | 0 | 0 | 0 | 0  | 0 | 0 | 0 | 0 | 0 | 0 | 0 |
|                                                                                                                   | 0 | 0 | 0 | 0 | 0 | 0  | 0 | 0 | 0 | 0 | 0 | 0 | 0 |
|                                                                                                                   | 0 | 0 | 0 | 0 | 0 | 0  | 0 |   |   |   |   |   |   |
| "Viruses;Uroviricota;Caudoviricetes;Caudoviricetes__na;Caudoviricetes__na;Orchidvirus;Orchidvirus__uc"            |   |   |   |   |   |    |   |   |   |   |   |   |   |
|                                                                                                                   | 0 | 0 | 0 | 0 | 0 | 32 | 0 | 0 | 0 | 0 | 0 | 0 | 0 |
|                                                                                                                   | 0 | 0 | 0 | 0 | 0 | 0  | 0 | 0 | 0 | 0 | 0 | 0 | 0 |
|                                                                                                                   | 0 | 0 | 0 | 0 | 0 | 0  | 0 | 0 | 0 | 0 | 0 | 0 | 0 |
|                                                                                                                   | 0 | 0 | 0 | 0 | 0 | 0  | 0 | 0 | 0 | 0 | 0 | 0 | 0 |
|                                                                                                                   | 0 | 0 | 0 | 0 | 0 | 0  | 0 | 0 | 0 | 0 | 0 | 0 | 0 |
|                                                                                                                   | 0 | 0 | 0 | 0 | 0 | 0  | 0 |   |   |   |   |   |   |
| "Viruses;Uroviricota;Caudoviricetes;Caudoviricetes__na;Caudoviricetes__na;Otagovirus;Otagovirus__uc"              |   |   |   |   |   |    |   |   |   |   |   |   |   |
|                                                                                                                   | 0 | 0 | 0 | 0 | 0 | 1  | 0 | 0 | 0 | 0 | 0 | 0 | 0 |
|                                                                                                                   | 0 | 0 | 0 | 0 | 0 | 0  | 0 | 0 | 0 | 0 | 0 | 0 | 0 |
|                                                                                                                   | 0 | 0 | 0 | 0 | 0 | 0  | 0 | 0 | 0 | 0 | 0 | 0 | 0 |
|                                                                                                                   | 0 | 0 | 0 | 0 | 0 | 0  | 0 | 0 | 0 | 0 | 0 | 0 | 0 |
|                                                                                                                   | 0 | 0 | 0 | 0 | 0 | 0  | 0 | 0 | 0 | 0 | 0 | 0 | 0 |
|                                                                                                                   | 0 | 0 | 0 | 0 | 0 | 0  | 0 |   |   |   |   |   |   |
| "Viruses;Uroviricota;Caudoviricetes;Caudoviricetes__na;Caudoviricetes__na;Otagovirus;Pseudomonas_phage_Astolliot" |   |   |   |   |   |    |   |   |   |   |   |   |   |
|                                                                                                                   | 0 | 0 | 0 | 0 | 0 | 0  | 0 | 0 | 0 | 0 | 1 | 0 | 0 |
|                                                                                                                   | 0 | 0 | 0 | 0 | 0 | 0  | 0 | 0 | 0 | 0 | 0 | 0 | 0 |
|                                                                                                                   | 0 | 0 | 0 | 0 | 0 | 0  | 0 | 0 | 0 | 0 | 0 | 0 | 0 |
|                                                                                                                   | 0 | 0 | 0 | 0 | 0 | 0  | 0 | 0 | 0 | 0 | 0 | 0 | 0 |
|                                                                                                                   | 0 | 0 | 0 | 0 | 0 | 0  | 0 | 0 | 0 | 0 | 0 | 0 | 0 |
|                                                                                                                   | 0 | 0 | 0 | 0 | 0 | 0  | 0 |   |   |   |   |   |   |
| "Viruses;Uroviricota;Caudoviricetes;Caudoviricetes__na;Caudoviricetes__na;Otagovirus;Pseudomonas_phage_PN09"      |   |   |   |   |   |    |   |   |   |   |   |   |   |
|                                                                                                                   | 0 | 0 | 0 | 0 | 0 | 0  | 0 | 0 | 0 | 0 | 0 | 0 | 0 |
|                                                                                                                   | 0 | 0 | 0 | 0 | 0 | 0  | 0 | 0 | 0 | 0 | 0 | 0 | 0 |
|                                                                                                                   | 0 | 0 | 0 | 0 | 0 | 0  | 0 | 0 | 0 | 0 | 0 | 0 | 0 |
|                                                                                                                   | 0 | 0 | 0 | 0 | 0 | 0  | 1 | 0 | 0 | 0 | 0 | 0 | 0 |

|                                                                                                           |   |   |   |   |   |   |   |   |   |   |     |    |
|-----------------------------------------------------------------------------------------------------------|---|---|---|---|---|---|---|---|---|---|-----|----|
| 0                                                                                                         | 0 | 0 | 0 | 0 | 0 | 0 | 0 | 0 | 0 | 0 | 0   | 0  |
| 0                                                                                                         | 0 | 0 | 0 | 0 | 0 | 0 |   |   |   |   |     |    |
| "Viruses;Uroviricota;Caudoviricetes;Caudoviricetes__na;Caudoviricetes__na;Pahexavirus;Cutibacterium_phage |   |   |   |   |   |   |   |   |   |   |     |    |
| _FD1"                                                                                                     | 0 | 0 | 0 | 0 | 0 | 0 | 0 | 0 | 0 | 0 | 1   | 0  |
|                                                                                                           | 0 | 0 | 0 | 0 | 0 | 0 | 0 | 0 | 0 | 0 | 0   | 0  |
|                                                                                                           | 0 | 0 | 0 | 0 | 0 | 0 | 0 | 0 | 0 | 0 | 0   | 0  |
|                                                                                                           | 0 | 0 | 0 | 0 | 0 | 0 | 0 | 0 | 0 | 0 | 0   | 0  |
|                                                                                                           | 0 | 0 | 0 | 0 | 0 | 0 | 0 | 0 | 0 | 0 | 0   | 0  |
|                                                                                                           | 0 | 0 | 0 | 0 | 0 | 0 | 0 | 0 | 0 | 0 | 0   | 0  |
|                                                                                                           | 0 | 0 | 0 | 0 | 0 | 0 |   |   |   |   |     |    |
| "Viruses;Uroviricota;Caudoviricetes;Caudoviricetes__na;Caudoviricetes__na;Pahexavirus;Cutibacterium_phage |   |   |   |   |   |   |   |   |   |   |     |    |
| _FD3"                                                                                                     | 0 | 0 | 0 | 0 | 0 | 1 | 0 | 0 | 0 | 0 | 139 | 0  |
|                                                                                                           | 0 | 0 | 0 | 0 | 0 | 0 | 0 | 0 | 0 | 0 | 0   | 0  |
|                                                                                                           | 0 | 0 | 0 | 0 | 0 | 0 | 0 | 0 | 0 | 4 | 0   | 0  |
|                                                                                                           | 0 | 0 | 1 | 0 | 0 | 0 | 0 | 0 | 0 | 0 | 0   | 0  |
|                                                                                                           | 0 | 0 | 0 | 0 | 0 | 0 | 2 | 0 | 0 | 0 | 0   | 0  |
|                                                                                                           | 0 | 0 | 0 | 0 | 0 | 0 |   |   |   |   |     |    |
| "Viruses;Uroviricota;Caudoviricetes;Caudoviricetes__na;Caudoviricetes__na;Pahexavirus;Cutibacterium_phage |   |   |   |   |   |   |   |   |   |   |     |    |
| _P104B"                                                                                                   | 0 | 0 | 0 | 0 | 0 | 0 | 0 | 0 | 0 | 0 | 14  | 0  |
|                                                                                                           | 0 | 0 | 0 | 0 | 0 | 0 | 0 | 0 | 0 | 0 | 0   | 0  |
|                                                                                                           | 0 | 0 | 0 | 0 | 0 | 0 | 0 | 0 | 0 | 0 | 0   | 0  |
|                                                                                                           | 0 | 0 | 0 | 0 | 0 | 0 | 0 | 0 | 0 | 0 | 0   | 0  |
|                                                                                                           | 0 | 0 | 0 | 0 | 0 | 0 | 0 | 0 | 0 | 0 | 0   | 0  |
|                                                                                                           | 0 | 0 | 0 | 0 | 0 | 0 |   |   |   |   |     |    |
| "Viruses;Uroviricota;Caudoviricetes;Caudoviricetes__na;Caudoviricetes__na;Pahexavirus;Cutibacterium_phage |   |   |   |   |   |   |   |   |   |   |     |    |
| _P107A"                                                                                                   |   | 0 | 0 | 0 | 0 | 2 | 0 | 0 | 0 | 0 | 0   | 11 |
|                                                                                                           | 0 | 0 | 0 | 0 | 0 | 0 | 0 | 0 | 0 | 0 | 0   | 0  |
|                                                                                                           | 0 | 0 | 0 | 0 | 0 | 0 | 0 | 0 | 0 | 0 | 0   | 0  |
|                                                                                                           | 0 | 0 | 0 | 0 | 0 | 0 | 0 | 0 | 0 | 1 | 0   | 0  |
|                                                                                                           | 0 | 0 | 0 | 0 | 0 | 0 | 0 | 0 | 0 | 0 | 0   | 0  |
|                                                                                                           | 0 | 0 | 0 | 0 | 0 | 0 | 0 |   |   |   |     |    |
| "Viruses;Uroviricota;Caudoviricetes;Caudoviricetes__na;Caudoviricetes__na;Pahexavirus;Cutibacterium_phage |   |   |   |   |   |   |   |   |   |   |     |    |
| _P108C"                                                                                                   |   | 0 | 0 | 0 | 0 | 0 | 0 | 0 | 0 | 0 | 1   | 0  |
|                                                                                                           | 0 | 0 | 0 | 0 | 0 | 0 | 0 | 0 | 0 | 0 | 0   | 0  |
|                                                                                                           | 0 | 0 | 0 | 0 | 0 | 0 | 0 | 0 | 0 | 0 | 0   | 0  |
|                                                                                                           | 0 | 0 | 0 | 0 | 0 | 0 | 0 | 0 | 0 | 0 | 0   | 0  |
|                                                                                                           | 0 | 0 | 0 | 0 | 0 | 0 | 0 | 0 | 0 | 0 | 0   | 0  |
|                                                                                                           | 0 | 0 | 0 | 0 | 0 | 0 | 0 |   |   |   |     |    |
| "Viruses;Uroviricota;Caudoviricetes;Caudoviricetes__na;Caudoviricetes__na;Pahexavirus;Cutibacterium_phage |   |   |   |   |   |   |   |   |   |   |     |    |
| _PAP1-1"                                                                                                  |   | 0 | 0 | 0 | 0 | 0 | 0 | 0 | 0 | 0 | 0   | 2  |
|                                                                                                           | 0 | 0 | 0 | 0 | 0 | 0 | 0 | 0 | 0 | 0 | 0   | 0  |
|                                                                                                           | 0 | 0 | 0 | 0 | 0 | 0 | 0 | 0 | 0 | 0 | 0   | 0  |
|                                                                                                           | 0 | 0 | 0 | 0 | 0 | 0 | 0 | 0 | 0 | 0 | 0   | 0  |
|                                                                                                           | 0 | 0 | 0 | 0 | 0 | 0 | 0 | 0 | 0 | 0 | 0   | 0  |
|                                                                                                           | 0 | 0 | 0 | 0 | 0 | 0 | 0 |   |   |   |     |    |
| "Viruses;Uroviricota;Caudoviricetes;Caudoviricetes__na;Caudoviricetes__na;Pahexavirus;Cutibacterium_phage |   |   |   |   |   |   |   |   |   |   |     |    |
| _PAVL21"                                                                                                  |   | 0 | 0 | 0 | 0 | 0 | 0 | 0 | 0 | 0 | 0   | 38 |
|                                                                                                           | 0 | 0 | 0 | 0 | 0 | 0 | 0 | 0 | 0 | 0 | 0   | 0  |
|                                                                                                           | 0 | 0 | 0 | 0 | 0 | 0 | 0 | 0 | 0 | 2 | 0   | 0  |
|                                                                                                           | 0 | 0 | 0 | 6 | 0 | 0 | 0 | 4 | 0 | 0 | 0   | 0  |

[illegible]

[illegible]



[illegible]

|                                                                                                          |   |   |   |   |   |   |   |   |   |   |   |   |   |
|----------------------------------------------------------------------------------------------------------|---|---|---|---|---|---|---|---|---|---|---|---|---|
|                                                                                                          | 0 | 0 | 0 | 0 | 0 | 0 | 0 | 0 | 0 | 0 | 0 | 0 | 0 |
|                                                                                                          | 0 | 0 | 0 | 0 | 0 | 0 | 0 | 0 | 0 | 0 | 0 | 0 | 0 |
| "Viruses;Uroviricota;Caudoviricetes;Caudoviricetes__na;Caudoviricetes__na;Pahexavirus;Pahexavirus_PHL041 |   |   |   |   |   |   |   |   |   |   |   |   |   |
| M10"                                                                                                     | 0 | 0 | 1 | 0 | 0 | 0 | 0 | 0 | 0 | 0 | 6 | 0 | 0 |
|                                                                                                          | 0 | 0 | 0 | 0 | 0 | 0 | 0 | 0 | 0 | 0 | 0 | 0 | 0 |
|                                                                                                          | 0 | 0 | 0 | 0 | 0 | 0 | 0 | 0 | 0 | 5 | 0 | 0 | 0 |
|                                                                                                          | 0 | 0 | 0 | 0 | 0 | 0 | 0 | 0 | 0 | 0 | 0 | 0 | 0 |
|                                                                                                          | 0 | 0 | 0 | 0 | 0 | 0 | 0 | 0 | 0 | 0 | 0 | 0 | 0 |
|                                                                                                          | 0 | 0 | 0 | 0 | 0 | 0 | 0 | 0 | 0 | 0 | 0 | 0 | 0 |
| "Viruses;Uroviricota;Caudoviricetes;Caudoviricetes__na;Caudoviricetes__na;Pahexavirus;Pahexavirus_PHL060 |   |   |   |   |   |   |   |   |   |   |   |   |   |
| L00"                                                                                                     | 0 | 0 | 0 | 0 | 0 | 0 | 0 | 0 | 0 | 0 | 1 | 0 | 0 |
|                                                                                                          | 0 | 0 | 0 | 0 | 0 | 0 | 0 | 0 | 0 | 0 | 0 | 0 | 0 |
|                                                                                                          | 0 | 0 | 0 | 0 | 0 | 0 | 0 | 0 | 0 | 0 | 0 | 0 | 0 |
|                                                                                                          | 0 | 0 | 0 | 0 | 0 | 0 | 0 | 0 | 0 | 0 | 0 | 0 | 0 |
|                                                                                                          | 0 | 0 | 0 | 0 | 0 | 0 | 0 | 0 | 0 | 0 | 0 | 0 | 0 |
|                                                                                                          | 0 | 0 | 0 | 0 | 0 | 0 | 0 | 0 | 0 | 0 | 0 | 0 | 0 |
| "Viruses;Uroviricota;Caudoviricetes;Caudoviricetes__na;Caudoviricetes__na;Pahexavirus;Pahexavirus_PHL067 |   |   |   |   |   |   |   |   |   |   |   |   |   |
| M01"                                                                                                     | 0 | 0 | 0 | 0 | 0 | 0 | 0 | 0 | 0 | 0 | 3 | 0 | 0 |
|                                                                                                          | 0 | 0 | 0 | 0 | 0 | 0 | 0 | 0 | 0 | 0 | 0 | 0 | 0 |
|                                                                                                          | 0 | 0 | 0 | 0 | 0 | 0 | 0 | 0 | 0 | 0 | 0 | 0 | 0 |
|                                                                                                          | 0 | 0 | 0 | 0 | 0 | 0 | 0 | 0 | 0 | 0 | 0 | 0 | 0 |
|                                                                                                          | 0 | 0 | 0 | 0 | 0 | 0 | 0 | 0 | 0 | 0 | 0 | 0 | 0 |
|                                                                                                          | 0 | 0 | 0 | 0 | 0 | 0 | 0 | 0 | 0 | 0 | 0 | 0 | 0 |
| "Viruses;Uroviricota;Caudoviricetes;Caudoviricetes__na;Caudoviricetes__na;Pahexavirus;Pahexavirus_PHL070 |   |   |   |   |   |   |   |   |   |   |   |   |   |
| N00"                                                                                                     | 0 | 0 | 0 | 0 | 0 | 0 | 0 | 0 | 0 | 0 | 5 | 0 | 0 |
|                                                                                                          | 0 | 0 | 0 | 0 | 0 | 0 | 0 | 0 | 0 | 0 | 0 | 0 | 0 |
|                                                                                                          | 0 | 0 | 0 | 0 | 0 | 0 | 0 | 0 | 0 | 4 | 0 | 0 | 0 |
|                                                                                                          | 0 | 0 | 0 | 0 | 0 | 0 | 0 | 0 | 0 | 0 | 0 | 0 | 0 |
|                                                                                                          | 0 | 0 | 0 | 0 | 0 | 0 | 0 | 0 | 0 | 0 | 0 | 0 | 0 |
|                                                                                                          | 0 | 0 | 0 | 0 | 0 | 0 | 0 | 0 | 0 | 0 | 0 | 0 | 0 |
| "Viruses;Uroviricota;Caudoviricetes;Caudoviricetes__na;Caudoviricetes__na;Pahexavirus;Pahexavirus_PHL071 |   |   |   |   |   |   |   |   |   |   |   |   |   |
| N05"                                                                                                     | 0 | 0 | 0 | 0 | 0 | 0 | 0 | 0 | 0 | 0 | 0 | 0 | 0 |
|                                                                                                          | 0 | 0 | 0 | 0 | 0 | 0 | 0 | 0 | 0 | 0 | 0 | 0 | 0 |
|                                                                                                          | 0 | 0 | 0 | 0 | 0 | 0 | 0 | 0 | 0 | 1 | 0 | 0 | 0 |
|                                                                                                          | 0 | 0 | 0 | 0 | 0 | 0 | 0 | 0 | 0 | 0 | 0 | 0 | 0 |
|                                                                                                          | 0 | 0 | 0 | 0 | 0 | 0 | 0 | 0 | 0 | 0 | 0 | 0 | 0 |
|                                                                                                          | 0 | 0 | 0 | 0 | 0 | 0 | 0 | 0 | 0 | 0 | 0 | 0 | 0 |
| "Viruses;Uroviricota;Caudoviricetes;Caudoviricetes__na;Caudoviricetes__na;Pahexavirus;Pahexavirus_PHL092 |   |   |   |   |   |   |   |   |   |   |   |   |   |
| M00"                                                                                                     | 0 | 0 | 0 | 0 | 0 | 0 | 0 | 0 | 0 | 0 | 1 | 0 | 0 |
|                                                                                                          | 0 | 0 | 0 | 0 | 0 | 0 | 0 | 0 | 0 | 0 | 0 | 0 | 0 |
|                                                                                                          | 0 | 0 | 0 | 0 | 0 | 0 | 0 | 0 | 0 | 0 | 0 | 0 | 0 |
|                                                                                                          | 0 | 0 | 0 | 0 | 0 | 0 | 0 | 0 | 0 | 0 | 0 | 0 | 0 |
|                                                                                                          | 0 | 0 | 0 | 0 | 0 | 0 | 0 | 0 | 0 | 0 | 0 | 0 | 0 |
|                                                                                                          | 0 | 0 | 0 | 0 | 0 | 0 | 0 | 0 | 0 | 0 | 0 | 0 | 0 |
| "Viruses;Uroviricota;Caudoviricetes;Caudoviricetes__na;Caudoviricetes__na;Pahexavirus;Pahexavirus_PHL095 |   |   |   |   |   |   |   |   |   |   |   |   |   |
| N00"                                                                                                     | 0 | 0 | 0 | 0 | 0 | 0 | 0 | 0 | 0 | 0 | 0 | 0 | 0 |
|                                                                                                          | 0 | 0 | 0 | 0 | 0 | 0 | 0 | 0 | 0 | 0 | 0 | 0 | 0 |
|                                                                                                          | 0 | 0 | 0 | 0 | 0 | 0 | 0 | 0 | 0 | 2 | 0 | 0 | 0 |
|                                                                                                          | 0 | 0 | 0 | 0 | 0 | 0 | 0 | 0 | 0 | 0 | 0 | 0 | 0 |

|                                                                                                          |   |   |   |   |   |   |   |   |   |   |    |   |   |
|----------------------------------------------------------------------------------------------------------|---|---|---|---|---|---|---|---|---|---|----|---|---|
|                                                                                                          | 0 | 0 | 0 | 0 | 0 | 0 | 0 | 0 | 0 | 0 | 0  | 0 | 0 |
|                                                                                                          | 0 | 0 | 0 | 0 | 0 | 0 | 0 | 0 | 0 | 0 | 0  | 0 | 0 |
| "Viruses;Uroviricota;Caudoviricetes;Caudoviricetes__na;Caudoviricetes__na;Pahexavirus;Pahexavirus_PHL111 |   |   |   |   |   |   |   |   |   |   |    |   |   |
| M01"                                                                                                     | 0 | 0 | 0 | 0 | 0 | 0 | 0 | 0 | 0 | 0 | 5  | 0 | 0 |
|                                                                                                          | 0 | 0 | 0 | 0 | 0 | 0 | 0 | 0 | 0 | 0 | 0  | 0 | 0 |
|                                                                                                          | 0 | 0 | 0 | 0 | 0 | 0 | 0 | 0 | 0 | 0 | 0  | 0 | 0 |
|                                                                                                          | 0 | 0 | 2 | 0 | 0 | 0 | 0 | 0 | 0 | 0 | 0  | 0 | 0 |
|                                                                                                          | 0 | 0 | 0 | 0 | 0 | 0 | 0 | 0 | 0 | 0 | 0  | 0 | 0 |
|                                                                                                          | 0 | 0 | 0 | 0 | 0 | 0 | 0 | 0 | 0 | 0 | 0  | 0 | 0 |
| "Viruses;Uroviricota;Caudoviricetes;Caudoviricetes__na;Caudoviricetes__na;Pahexavirus;Pahexavirus_PHL112 |   |   |   |   |   |   |   |   |   |   |    |   |   |
| N00"                                                                                                     | 0 | 0 | 0 | 0 | 0 | 0 | 0 | 0 | 0 | 0 | 0  | 0 | 0 |
|                                                                                                          | 0 | 0 | 0 | 0 | 0 | 0 | 0 | 0 | 0 | 0 | 0  | 0 | 0 |
|                                                                                                          | 0 | 0 | 0 | 0 | 0 | 0 | 0 | 0 | 0 | 3 | 0  | 0 | 0 |
|                                                                                                          | 0 | 0 | 0 | 0 | 0 | 0 | 0 | 0 | 0 | 0 | 0  | 0 | 0 |
|                                                                                                          | 0 | 0 | 0 | 0 | 0 | 0 | 0 | 0 | 0 | 0 | 0  | 0 | 0 |
|                                                                                                          | 0 | 0 | 0 | 0 | 0 | 0 | 0 | 0 | 0 | 0 | 0  | 0 | 0 |
| "Viruses;Uroviricota;Caudoviricetes;Caudoviricetes__na;Caudoviricetes__na;Pahexavirus;Pahexavirus_PHL113 |   |   |   |   |   |   |   |   |   |   |    |   |   |
| M01"                                                                                                     | 0 | 0 | 0 | 0 | 0 | 0 | 0 | 0 | 1 | 0 | 4  | 0 | 0 |
|                                                                                                          | 0 | 0 | 0 | 0 | 0 | 0 | 0 | 0 | 0 | 0 | 0  | 0 | 0 |
|                                                                                                          | 0 | 0 | 0 | 0 | 0 | 0 | 0 | 0 | 0 | 0 | 0  | 0 | 0 |
|                                                                                                          | 0 | 0 | 0 | 0 | 0 | 0 | 0 | 0 | 0 | 0 | 0  | 0 | 0 |
|                                                                                                          | 0 | 0 | 0 | 0 | 0 | 0 | 0 | 0 | 0 | 0 | 0  | 0 | 0 |
|                                                                                                          | 0 | 0 | 0 | 0 | 0 | 0 | 0 | 0 | 0 | 0 | 0  | 0 | 0 |
| "Viruses;Uroviricota;Caudoviricetes;Caudoviricetes__na;Caudoviricetes__na;Pahexavirus;Pahexavirus_PHL114 |   |   |   |   |   |   |   |   |   |   |    |   |   |
| L00"                                                                                                     | 0 | 0 | 0 | 0 | 0 | 0 | 0 | 0 | 0 | 0 | 20 | 0 | 0 |
|                                                                                                          | 0 | 0 | 0 | 0 | 0 | 0 | 0 | 0 | 0 | 0 | 0  | 0 | 0 |
|                                                                                                          | 0 | 0 | 0 | 0 | 0 | 0 | 0 | 0 | 0 | 0 | 0  | 0 | 0 |
|                                                                                                          | 0 | 0 | 0 | 0 | 0 | 0 | 0 | 0 | 0 | 0 | 0  | 0 | 0 |
|                                                                                                          | 0 | 0 | 0 | 0 | 0 | 0 | 0 | 0 | 0 | 0 | 0  | 0 | 0 |
|                                                                                                          | 0 | 0 | 0 | 0 | 0 | 0 | 0 | 0 | 0 | 0 | 0  | 0 | 0 |
| "Viruses;Uroviricota;Caudoviricetes;Caudoviricetes__na;Caudoviricetes__na;Pahexavirus;Pahexavirus_PHL116 |   |   |   |   |   |   |   |   |   |   |    |   |   |
| M00"                                                                                                     | 0 | 0 | 0 | 0 | 0 | 0 | 0 | 0 | 0 | 0 | 21 | 0 | 0 |
|                                                                                                          | 0 | 0 | 0 | 0 | 0 | 0 | 0 | 0 | 0 | 0 | 0  | 0 | 0 |
|                                                                                                          | 0 | 0 | 0 | 0 | 0 | 0 | 0 | 0 | 0 | 0 | 0  | 0 | 0 |
|                                                                                                          | 0 | 0 | 0 | 0 | 0 | 0 | 0 | 2 | 0 | 0 | 0  | 0 | 0 |
|                                                                                                          | 0 | 0 | 0 | 0 | 0 | 0 | 0 | 0 | 0 | 0 | 0  | 0 | 0 |
|                                                                                                          | 0 | 0 | 0 | 0 | 0 | 0 | 0 | 0 | 0 | 0 | 0  | 0 | 0 |
| "Viruses;Uroviricota;Caudoviricetes;Caudoviricetes__na;Caudoviricetes__na;Pahexavirus;Pahexavirus_PHL152 |   |   |   |   |   |   |   |   |   |   |    |   |   |
| M00"                                                                                                     | 0 | 0 | 0 | 0 | 0 | 0 | 0 | 0 | 0 | 0 | 9  | 0 | 0 |
|                                                                                                          | 0 | 0 | 0 | 0 | 0 | 0 | 0 | 0 | 0 | 0 | 0  | 0 | 0 |
|                                                                                                          | 0 | 0 | 0 | 0 | 0 | 0 | 0 | 0 | 0 | 0 | 0  | 0 | 0 |
|                                                                                                          | 0 | 0 | 0 | 0 | 0 | 0 | 0 | 0 | 0 | 0 | 0  | 0 | 0 |
|                                                                                                          | 0 | 0 | 0 | 0 | 0 | 0 | 0 | 0 | 0 | 0 | 0  | 0 | 0 |
|                                                                                                          | 0 | 0 | 0 | 0 | 0 | 0 | 0 | 0 | 0 | 0 | 0  | 0 | 0 |
| "Viruses;Uroviricota;Caudoviricetes;Caudoviricetes__na;Caudoviricetes__na;Pahexavirus;Pahexavirus_PHL171 |   |   |   |   |   |   |   |   |   |   |    |   |   |
| M01"                                                                                                     | 0 | 0 | 0 | 0 | 1 | 0 | 0 | 0 | 0 | 0 | 0  | 0 | 0 |
|                                                                                                          | 0 | 0 | 0 | 0 | 0 | 0 | 0 | 0 | 0 | 0 | 0  | 0 | 0 |
|                                                                                                          | 0 | 0 | 0 | 0 | 0 | 0 | 0 | 0 | 0 | 1 | 0  | 0 | 0 |
|                                                                                                          | 0 | 0 | 0 | 0 | 0 | 0 | 0 | 0 | 0 | 0 | 0  | 0 | 0 |





[illegible]

|                                                                                                           |   |   |   |   |   |   |   |   |   |   |    |   |
|-----------------------------------------------------------------------------------------------------------|---|---|---|---|---|---|---|---|---|---|----|---|
| 0                                                                                                         | 0 | 0 | 0 | 0 | 0 | 0 | 0 | 0 | 0 | 0 | 0  | 0 |
| 0                                                                                                         | 0 | 0 | 0 | 0 | 0 | 0 | 0 |   |   |   |    |   |
| "Viruses;Uroviricota;Caudoviricetes;Caudoviricetes__na;Caudoviricetes__na;Pahexavirus;Propionibacterium_p |   |   |   |   |   |   |   |   |   |   |    |   |
| hage_PAC9"                                                                                                | 0 | 0 | 0 | 0 | 0 | 0 | 0 | 0 | 0 | 0 | 16 | 0 |
| 0                                                                                                         | 0 | 0 | 0 | 0 | 0 | 0 | 0 | 0 | 0 | 0 | 0  | 0 |
| 0                                                                                                         | 0 | 0 | 0 | 0 | 0 | 0 | 0 | 0 | 0 | 0 | 0  | 0 |
| 0                                                                                                         | 0 | 0 | 0 | 0 | 0 | 0 | 0 | 0 | 0 | 0 | 0  | 0 |
| 0                                                                                                         | 0 | 0 | 0 | 0 | 0 | 0 | 0 | 0 | 0 | 0 | 0  | 0 |
| 0                                                                                                         | 0 | 0 | 0 | 0 | 0 | 0 | 0 | 0 | 0 | 0 | 0  | 0 |
| 0                                                                                                         | 0 | 0 | 0 | 0 | 0 | 0 | 0 |   |   |   |    |   |
| "Viruses;Uroviricota;Caudoviricetes;Caudoviricetes__na;Caudoviricetes__na;Pahexavirus;Propionibacterium_p |   |   |   |   |   |   |   |   |   |   |    |   |
| hage_PacnesP1"                                                                                            | 0 | 0 | 0 | 0 | 0 | 0 | 0 | 0 | 0 | 0 | 1  | 0 |
| 0                                                                                                         | 0 | 0 | 0 | 0 | 0 | 0 | 0 | 0 | 0 | 0 | 0  | 0 |
| 0                                                                                                         | 0 | 0 | 0 | 0 | 0 | 0 | 0 | 0 | 0 | 0 | 0  | 0 |
| 0                                                                                                         | 0 | 0 | 0 | 0 | 0 | 0 | 0 | 0 | 0 | 0 | 0  | 0 |
| 0                                                                                                         | 0 | 0 | 0 | 0 | 0 | 0 | 0 | 0 | 0 | 0 | 0  | 0 |
| 0                                                                                                         | 0 | 0 | 0 | 0 | 0 | 0 | 0 |   |   |   |    |   |
| "Viruses;Uroviricota;Caudoviricetes;Caudoviricetes__na;Caudoviricetes__na;Pahexavirus;Propionibacterium_p |   |   |   |   |   |   |   |   |   |   |    |   |
| hage_PaP11-13"                                                                                            | 0 | 0 | 0 | 0 | 0 | 0 | 0 | 0 | 0 | 0 | 3  | 0 |
| 0                                                                                                         | 0 | 0 | 0 | 0 | 0 | 0 | 0 | 0 | 0 | 0 | 0  | 0 |
| 0                                                                                                         | 0 | 0 | 0 | 0 | 0 | 0 | 0 | 0 | 0 | 1 | 0  | 0 |
| 0                                                                                                         | 0 | 0 | 0 | 0 | 0 | 0 | 0 | 0 | 0 | 0 | 0  | 0 |
| 0                                                                                                         | 0 | 0 | 0 | 0 | 0 | 0 | 0 | 0 | 0 | 0 | 0  | 0 |
| 0                                                                                                         | 0 | 0 | 0 | 0 | 0 | 0 | 0 |   |   |   |    |   |
| "Viruses;Uroviricota;Caudoviricetes;Caudoviricetes__na;Caudoviricetes__na;Pahexavirus;Propionibacterium_p |   |   |   |   |   |   |   |   |   |   |    |   |
| hage_QueenBey"                                                                                            | 0 | 0 | 0 | 0 | 0 | 0 | 0 | 0 | 0 | 0 | 0  | 0 |
| 0                                                                                                         | 0 | 0 | 0 | 0 | 0 | 0 | 0 | 0 | 0 | 0 | 0  | 0 |
| 0                                                                                                         | 0 | 0 | 0 | 0 | 0 | 0 | 0 | 0 | 0 | 0 | 0  | 0 |
| 0                                                                                                         | 0 | 0 | 0 | 0 | 0 | 0 | 0 | 0 | 0 | 1 | 0  | 0 |
| 0                                                                                                         | 0 | 0 | 0 | 0 | 0 | 0 | 0 | 0 | 0 | 0 | 0  | 0 |
| 0                                                                                                         | 0 | 0 | 0 | 0 | 0 | 0 | 0 | 0 |   |   |    |   |
| "Viruses;Uroviricota;Caudoviricetes;Caudoviricetes__na;Caudoviricetes__na;Pahexavirus;Propionibacterium_p |   |   |   |   |   |   |   |   |   |   |    |   |
| hage_TCUCAP1"                                                                                             | 0 | 0 | 0 | 0 | 0 | 0 | 0 | 0 | 0 | 0 | 0  | 5 |
| 0                                                                                                         | 0 | 0 | 0 | 0 | 0 | 0 | 0 | 0 | 0 | 0 | 0  | 0 |
| 0                                                                                                         | 0 | 0 | 0 | 0 | 0 | 0 | 0 | 0 | 0 | 0 | 2  | 0 |
| 0                                                                                                         | 0 | 0 | 0 | 0 | 0 | 0 | 0 | 0 | 0 | 0 | 0  | 0 |
| 0                                                                                                         | 0 | 0 | 0 | 0 | 0 | 0 | 0 | 0 | 0 | 0 | 0  | 0 |
| 0                                                                                                         | 0 | 0 | 0 | 0 | 0 | 0 | 0 | 0 |   |   |    |   |
| "Viruses;Uroviricota;Caudoviricetes;Caudoviricetes__na;Caudoviricetes__na;Pakpunavirus;Pakpunavirus__uc"  |   |   |   |   |   |   |   |   |   |   |    |   |
| 0                                                                                                         | 0 | 0 | 0 | 0 | 4 | 0 | 0 | 0 | 0 | 0 | 0  | 0 |
| 0                                                                                                         | 0 | 0 | 0 | 0 | 0 | 0 | 0 | 0 | 0 | 0 | 0  | 0 |
| 0                                                                                                         | 0 | 0 | 0 | 0 | 0 | 0 | 0 | 0 | 0 | 0 | 0  | 0 |
| 0                                                                                                         | 0 | 0 | 0 | 0 | 0 | 0 | 0 | 0 | 0 | 0 | 0  | 0 |
| 0                                                                                                         | 0 | 0 | 0 | 0 | 0 | 0 | 0 | 0 | 0 | 0 | 0  | 0 |
| 0                                                                                                         | 0 | 0 | 0 | 0 | 0 | 0 |   |   |   |   |    |   |
| "Viruses;Uroviricota;Caudoviricetes;Caudoviricetes__na;Caudoviricetes__na;Pakpunavirus;Pseudomonas_phag   |   |   |   |   |   |   |   |   |   |   |    |   |
| e_EM"                                                                                                     | 0 | 0 | 0 | 0 | 0 | 0 | 0 | 0 | 0 | 0 | 0  | 0 |
| 0                                                                                                         | 0 | 0 | 0 | 0 | 0 | 0 | 0 | 0 | 0 | 0 | 0  | 0 |
| 0                                                                                                         | 0 | 0 | 0 | 0 | 0 | 0 | 0 | 0 | 0 | 0 | 0  | 0 |
| 0                                                                                                         | 0 | 0 | 0 | 0 | 0 | 0 | 0 | 2 | 0 | 0 | 0  | 0 |

[illegible]



[illegible]

|                                                                                                                       |   |   |   |   |    |   |   |   |   |   |   |   |
|-----------------------------------------------------------------------------------------------------------------------|---|---|---|---|----|---|---|---|---|---|---|---|
|                                                                                                                       | 0 | 0 | 0 | 0 | 0  | 0 | 0 | 0 | 0 | 0 | 0 | 0 |
|                                                                                                                       | 0 | 0 | 0 | 0 | 0  | 0 | 0 |   |   |   |   |   |
| "Viruses;Uroviricota;Caudoviricetes;Caudoviricetes__na;Caudoviricetes__na;Pukovnikvirus;Pukovnikvirus_ironman"        | 0 | 0 | 0 | 0 | 0  | 0 | 0 | 0 | 0 | 0 | 0 | 0 |
|                                                                                                                       | 0 | 0 | 0 | 0 | 0  | 0 | 0 | 0 | 0 | 0 | 0 | 0 |
|                                                                                                                       | 0 | 0 | 0 | 0 | 0  | 0 | 0 | 0 | 0 | 0 | 0 | 0 |
|                                                                                                                       | 0 | 0 | 0 | 0 | 0  | 0 | 0 | 0 | 0 | 0 | 0 | 0 |
|                                                                                                                       | 0 | 0 | 1 | 0 | 0  | 0 | 0 | 0 | 0 | 0 | 0 | 0 |
|                                                                                                                       | 0 | 0 | 0 | 0 | 0  | 0 | 0 |   |   |   |   |   |
| "Viruses;Uroviricota;Caudoviricetes;Caudoviricetes__na;Caudoviricetes__na;Qingdaovirus;Pseudoalteromonas_phage_PH357" | 0 | 0 | 0 | 0 | 0  | 0 | 0 | 0 | 0 | 0 | 0 | 0 |
|                                                                                                                       | 0 | 0 | 0 | 0 | 0  | 0 | 0 | 0 | 0 | 0 | 0 | 0 |
|                                                                                                                       | 0 | 0 | 0 | 0 | 0  | 0 | 0 | 0 | 0 | 0 | 0 | 0 |
|                                                                                                                       | 0 | 0 | 1 | 0 | 0  | 0 | 0 | 0 | 0 | 0 | 0 | 0 |
|                                                                                                                       | 0 | 0 | 0 | 0 | 0  | 0 | 0 | 0 | 0 | 0 | 0 | 0 |
|                                                                                                                       | 0 | 0 | 0 | 0 | 0  | 0 | 0 | 0 |   |   |   |   |
| "Viruses;Uroviricota;Caudoviricetes;Caudoviricetes__na;Caudoviricetes__na;Questintvirus;Questintvirus_Q54"            | 0 | 0 | 0 | 0 | 0  | 0 | 0 | 0 | 0 | 0 | 0 | 0 |
|                                                                                                                       | 0 | 1 | 0 | 0 | 0  | 0 | 0 | 0 | 0 | 0 | 0 | 0 |
|                                                                                                                       | 0 | 0 | 0 | 0 | 0  | 0 | 0 | 0 | 0 | 0 | 0 | 0 |
|                                                                                                                       | 0 | 0 | 0 | 0 | 0  | 0 | 0 | 0 | 0 | 0 | 0 | 0 |
|                                                                                                                       | 0 | 0 | 0 | 0 | 0  | 0 | 0 | 0 | 0 | 0 | 0 | 0 |
|                                                                                                                       | 0 | 0 | 0 | 0 | 0  | 0 | 0 |   |   |   |   |   |
| "Viruses;Uroviricota;Caudoviricetes;Caudoviricetes__na;Caudoviricetes__na;Rahariannevirus;Rahariannevirus_raharianne" | 0 | 0 | 0 | 0 | 8  | 0 | 0 | 0 | 0 | 0 | 0 | 0 |
|                                                                                                                       | 0 | 0 | 0 | 0 | 0  | 0 | 0 | 0 | 0 | 0 | 0 | 0 |
|                                                                                                                       | 0 | 0 | 0 | 0 | 0  | 0 | 0 | 0 | 0 | 0 | 0 | 0 |
|                                                                                                                       | 0 | 0 | 0 | 0 | 0  | 0 | 0 | 0 | 0 | 0 | 0 | 0 |
|                                                                                                                       | 0 | 0 | 0 | 0 | 0  | 0 | 0 | 0 | 0 | 0 | 0 | 0 |
|                                                                                                                       | 0 | 0 | 0 | 0 | 0  | 0 | 0 |   |   |   |   |   |
| "Viruses;Uroviricota;Caudoviricetes;Caudoviricetes__na;Caudoviricetes__na;Rauchvirus;Rauchvirus_uc"                   | 0 | 0 | 0 | 0 | 0  | 0 | 0 | 0 | 1 | 0 | 0 | 0 |
|                                                                                                                       | 0 | 0 | 0 | 0 | 0  | 0 | 0 | 0 | 0 | 0 | 0 | 0 |
|                                                                                                                       | 0 | 0 | 0 | 0 | 0  | 0 | 0 | 0 | 0 | 0 | 0 | 0 |
|                                                                                                                       | 0 | 0 | 0 | 0 | 0  | 0 | 0 | 0 | 0 | 0 | 0 | 0 |
|                                                                                                                       | 0 | 0 | 0 | 0 | 0  | 0 | 0 | 0 | 0 | 0 | 0 | 0 |
|                                                                                                                       | 0 | 0 | 0 | 0 | 0  | 0 | 0 |   |   |   |   |   |
| "Viruses;Uroviricota;Caudoviricetes;Caudoviricetes__na;Caudoviricetes__na;Ravarandavirus;Ravarandavirus_uc"           | 0 | 0 | 0 | 0 | 0  | 0 | 0 | 0 | 0 | 0 | 0 | 0 |
|                                                                                                                       | 0 | 0 | 0 | 0 | 0  | 0 | 0 | 0 | 0 | 0 | 0 | 0 |
|                                                                                                                       | 0 | 0 | 0 | 0 | 0  | 0 | 0 | 0 | 2 | 0 | 0 | 0 |
|                                                                                                                       | 0 | 0 | 0 | 0 | 0  | 0 | 0 | 0 | 0 | 0 | 0 | 0 |
|                                                                                                                       | 0 | 0 | 0 | 0 | 0  | 0 | 0 | 0 | 0 | 0 | 0 | 0 |
|                                                                                                                       | 0 | 0 | 0 | 0 | 0  | 0 | 0 |   |   |   |   |   |
| "Viruses;Uroviricota;Caudoviricetes;Caudoviricetes__na;Caudoviricetes__na;Rigallicvirus;Rhizobium_phage_RHph_X2_24"   | 0 | 1 | 0 | 1 | 11 | 0 | 0 | 0 | 0 | 0 | 0 | 0 |
|                                                                                                                       | 0 | 0 | 0 | 0 | 0  | 0 | 0 | 0 | 0 | 0 | 0 | 0 |
|                                                                                                                       | 0 | 0 | 0 | 0 | 0  | 0 | 0 | 0 | 0 | 0 | 0 | 0 |
|                                                                                                                       | 0 | 0 | 0 | 0 | 0  | 0 | 0 | 0 | 1 | 0 | 0 | 0 |

[illegible]

[illegible]

[illegible]

[illegible]

[illegible]

[illegible]



[illegible]

[illegible]

[illegible]

[illegible]

[illegible]

[illegible]

[illegible]

[illegible]



[illegible]

[illegible]

[illegible]

|                                                                                                                 |   |   |   |   |   |   |   |   |   |   |   |   |
|-----------------------------------------------------------------------------------------------------------------|---|---|---|---|---|---|---|---|---|---|---|---|
|                                                                                                                 | 0 | 0 | 0 | 0 | 0 | 0 | 0 | 8 | 0 | 0 | 0 | 0 |
|                                                                                                                 | 0 | 0 | 0 | 0 | 0 | 0 | 0 |   |   |   |   |   |
| "Viruses;Uroviricota;Caudoviricetes;Caudoviricetes__na;Caudoviricetes__na;Unaquatrovirus;Unaquatrovirus__uc"    | 0 | 0 | 0 | 0 | 0 | 0 | 0 | 0 | 0 | 0 | 0 | 0 |
|                                                                                                                 | 0 | 0 | 1 | 0 | 8 | 0 | 0 | 0 | 0 | 0 | 0 | 0 |
|                                                                                                                 | 0 | 0 | 0 | 0 | 0 | 0 | 0 | 0 | 0 | 0 | 0 | 0 |
|                                                                                                                 | 0 | 0 | 0 | 0 | 0 | 0 | 0 | 0 | 0 | 0 | 0 | 0 |
|                                                                                                                 | 0 | 0 | 0 | 0 | 0 | 0 | 0 | 0 | 0 | 0 | 0 | 0 |
|                                                                                                                 | 0 | 0 | 0 | 0 | 0 | 0 | 0 |   |   |   |   |   |
| "Viruses;Uroviricota;Caudoviricetes;Caudoviricetes__na;Caudoviricetes__na;Unaquatrovirus;Unaquatrovirus_Ln9"    | 0 | 0 | 0 | 0 | 0 | 0 | 0 | 0 | 0 | 0 | 0 | 0 |
|                                                                                                                 | 0 | 0 | 0 | 0 | 7 | 0 | 0 | 0 | 0 | 0 | 0 | 0 |
|                                                                                                                 | 0 | 0 | 0 | 0 | 0 | 0 | 0 | 0 | 0 | 0 | 0 | 0 |
|                                                                                                                 | 0 | 0 | 0 | 0 | 0 | 0 | 0 | 0 | 0 | 0 | 0 | 0 |
|                                                                                                                 | 0 | 0 | 0 | 0 | 0 | 0 | 0 | 0 | 0 | 0 | 0 | 0 |
|                                                                                                                 | 0 | 0 | 0 | 0 | 0 | 0 | 0 |   |   |   |   |   |
| "Viruses;Uroviricota;Caudoviricetes;Caudoviricetes__na;Caudoviricetes__na;Unaquatrovirus;Unaquatrovirus_uv1A4"  | 0 | 0 | 0 | 0 | 0 | 0 | 0 | 0 | 0 | 0 | 0 | 0 |
|                                                                                                                 | 0 | 0 | 0 | 0 | 2 | 0 | 0 | 0 | 0 | 0 | 0 | 0 |
|                                                                                                                 | 0 | 0 | 0 | 0 | 0 | 0 | 0 | 0 | 0 | 0 | 0 | 0 |
|                                                                                                                 | 0 | 0 | 0 | 0 | 0 | 0 | 0 | 0 | 0 | 0 | 0 | 0 |
|                                                                                                                 | 0 | 0 | 0 | 0 | 0 | 0 | 0 | 0 | 0 | 0 | 0 | 0 |
|                                                                                                                 | 0 | 0 | 0 | 0 | 0 | 0 | 0 |   |   |   |   |   |
| "Viruses;Uroviricota;Caudoviricetes;Caudoviricetes__na;Caudoviricetes__na;Vashvirus;Streptomyces_phage_Euratis" | 0 | 0 | 0 | 0 | 3 | 0 | 0 | 0 | 0 | 0 | 0 | 0 |
|                                                                                                                 | 0 | 0 | 0 | 0 | 0 | 0 | 0 | 0 | 0 | 0 | 0 | 0 |
|                                                                                                                 | 0 | 0 | 0 | 0 | 0 | 0 | 0 | 0 | 0 | 0 | 0 | 0 |
|                                                                                                                 | 0 | 0 | 0 | 0 | 0 | 0 | 0 | 0 | 0 | 0 | 0 | 0 |
|                                                                                                                 | 0 | 0 | 0 | 0 | 0 | 0 | 0 | 0 | 0 | 0 | 0 | 0 |
|                                                                                                                 | 0 | 0 | 0 | 0 | 0 | 0 | 0 |   |   |   |   |   |
| "Viruses;Uroviricota;Caudoviricetes;Caudoviricetes__na;Caudoviricetes__na;Vedamuthuvirus;Vedamuthuvirus__uc"    | 0 | 0 | 0 | 0 | 0 | 0 | 0 | 0 | 0 | 2 | 0 | 0 |
|                                                                                                                 | 0 | 0 | 0 | 0 | 0 | 0 | 0 | 0 | 0 | 0 | 0 | 0 |
|                                                                                                                 | 0 | 0 | 0 | 0 | 0 | 0 | 0 | 0 | 0 | 0 | 0 | 0 |
|                                                                                                                 | 0 | 0 | 1 | 0 | 0 | 0 | 0 | 0 | 0 | 0 | 0 | 0 |
|                                                                                                                 | 0 | 0 | 0 | 0 | 0 | 0 | 0 | 0 | 0 | 0 | 0 | 0 |
|                                                                                                                 | 0 | 0 | 0 | 0 | 0 | 0 | 0 |   |   |   |   |   |
| "Viruses;Uroviricota;Caudoviricetes;Caudoviricetes__na;Caudoviricetes__na;Vhulanivirus;Vhulanivirus_Shpa"       | 0 | 0 | 0 | 1 | 0 | 2 | 0 | 0 | 0 | 0 | 0 | 0 |
|                                                                                                                 | 0 | 0 | 0 | 0 | 0 | 0 | 0 | 0 | 0 | 0 | 0 | 0 |
|                                                                                                                 | 0 | 0 | 0 | 0 | 0 | 1 | 0 | 0 | 0 | 0 | 0 | 0 |
|                                                                                                                 | 0 | 0 | 0 | 0 | 0 | 0 | 0 | 1 | 0 | 0 | 0 | 0 |
|                                                                                                                 | 0 | 0 | 0 | 1 | 0 | 0 | 0 | 0 | 0 | 0 | 0 | 0 |
|                                                                                                                 | 0 | 0 | 0 | 0 | 0 | 0 | 0 |   |   |   |   |   |
| "Viruses;Uroviricota;Caudoviricetes;Caudoviricetes__na;Caudoviricetes__na;Weaselvirus;Weaselvirus_weasel"       | 0 | 0 | 0 | 0 | 0 | 0 | 0 | 0 | 0 | 0 | 0 | 0 |
|                                                                                                                 | 0 | 0 | 0 | 0 | 0 | 0 | 0 | 0 | 0 | 0 | 0 | 0 |
|                                                                                                                 | 0 | 0 | 0 | 0 | 0 | 0 | 0 | 0 | 0 | 0 | 0 | 0 |
|                                                                                                                 | 0 | 0 | 0 | 0 | 0 | 0 | 0 | 7 | 0 | 0 | 0 | 0 |

[illegible]

[illegible]

[illegible]

[illegible]



|                                                                                                                     |   |   |   |   |   |    |   |    |   |   |   |   |
|---------------------------------------------------------------------------------------------------------------------|---|---|---|---|---|----|---|----|---|---|---|---|
|                                                                                                                     | 0 | 0 | 0 | 0 | 0 | 0  | 0 | 0  | 0 | 0 | 0 | 0 |
|                                                                                                                     | 0 | 0 | 0 | 0 | 0 | 0  | 0 |    |   |   |   |   |
| "Viruses;Uroviricota;Caudoviricetes;Caudoviricetes__na;Herelleviridae;Kayvirus;Kayvirus__uc"                        | 0 |   |   |   |   |    |   |    |   |   |   | 0 |
|                                                                                                                     | 0 | 0 | 0 | 0 | 0 | 0  | 0 | 0  | 0 | 0 | 0 | 0 |
|                                                                                                                     | 0 | 0 | 0 | 0 | 0 | 0  | 0 | 0  | 0 | 0 | 0 | 0 |
|                                                                                                                     | 0 | 0 | 0 | 0 | 0 | 0  | 2 | 0  | 0 | 0 | 0 | 0 |
|                                                                                                                     | 0 | 0 | 0 | 0 | 0 | 0  | 0 | 0  | 0 | 0 | 0 | 0 |
|                                                                                                                     | 0 | 0 | 0 | 0 | 0 | 0  | 0 | 0  | 0 | 0 | 0 | 0 |
|                                                                                                                     | 0 | 0 | 0 | 0 | 0 |    |   |    |   |   |   |   |
| "Viruses;Uroviricota;Caudoviricetes;Caudoviricetes__na;Herelleviridae;Kochikohdavirus;Enterococcus_phage_156"       | 0 | 0 | 0 | 0 | 0 | 0  | 0 | 0  | 0 | 0 | 0 | 0 |
|                                                                                                                     | 0 | 0 | 0 | 0 | 0 | 0  | 0 | 0  | 0 | 0 | 0 | 0 |
|                                                                                                                     | 0 | 0 | 0 | 0 | 0 | 0  | 0 | 0  | 0 | 0 | 0 | 0 |
|                                                                                                                     | 0 | 0 | 0 | 0 | 0 | 0  | 0 | 0  | 0 | 0 | 0 | 0 |
|                                                                                                                     | 0 | 0 | 4 | 2 | 0 | 0  | 0 | 0  | 0 | 0 | 0 | 0 |
|                                                                                                                     | 0 | 0 | 0 | 0 | 0 | 0  |   |    |   |   |   |   |
| "Viruses;Uroviricota;Caudoviricetes;Caudoviricetes__na;Herelleviridae;Matervirus;Matervirus_mater"                  | 0 |   |   |   |   |    |   |    |   |   |   | 0 |
|                                                                                                                     | 0 | 0 | 1 | 0 | 0 | 0  | 0 | 0  | 0 | 0 | 0 | 0 |
|                                                                                                                     | 0 | 0 | 0 | 0 | 0 | 0  | 0 | 0  | 0 | 0 | 0 | 0 |
|                                                                                                                     | 0 | 0 | 0 | 0 | 0 | 0  | 0 | 0  | 0 | 0 | 0 | 0 |
|                                                                                                                     | 0 | 0 | 0 | 0 | 0 | 0  | 0 | 0  | 0 | 0 | 0 | 0 |
|                                                                                                                     | 0 | 0 | 0 | 0 | 0 | 0  | 0 | 0  | 0 | 0 | 0 | 0 |
|                                                                                                                     | 0 | 0 | 0 | 0 | 0 |    |   |    |   |   |   |   |
| "Viruses;Uroviricota;Caudoviricetes;Caudoviricetes__na;Herelleviridae;Nitunavirus;Bacillus_phage_035JT004"          | 0 | 0 | 0 | 0 | 0 | 0  | 0 | 0  | 0 | 0 | 0 | 0 |
|                                                                                                                     | 0 | 0 | 0 | 0 | 0 | 0  | 0 | 0  | 0 | 0 | 0 | 0 |
|                                                                                                                     | 0 | 0 | 0 | 0 | 0 | 0  | 0 | 0  | 0 | 0 | 0 | 0 |
|                                                                                                                     | 0 | 0 | 0 | 0 | 0 | 0  | 0 | 0  | 0 | 0 | 0 | 0 |
|                                                                                                                     | 0 | 0 | 0 | 0 | 0 | 0  | 0 | 0  | 1 | 0 | 0 | 0 |
|                                                                                                                     | 0 | 0 | 0 | 0 | 0 | 0  |   |    |   |   |   |   |
| "Viruses;Uroviricota;Caudoviricetes;Caudoviricetes__na;Herelleviridae;Schiekvirus;Enterococcus_phage_iF6"           | 0 | 0 | 0 | 0 | 0 | 0  | 0 | 0  | 0 | 0 | 0 | 0 |
|                                                                                                                     | 0 | 0 | 0 | 0 | 0 | 0  | 0 | 0  | 0 | 0 | 0 | 0 |
|                                                                                                                     | 0 | 0 | 0 | 0 | 0 | 1  | 0 | 0  | 0 | 0 | 0 | 0 |
|                                                                                                                     | 0 | 0 | 0 | 0 | 0 | 0  | 0 | 0  | 0 | 0 | 0 | 0 |
|                                                                                                                     | 0 | 0 | 0 | 0 | 0 | 0  | 0 | 0  | 0 | 0 | 0 | 0 |
|                                                                                                                     | 0 | 0 | 0 | 0 | 0 |    |   |    |   |   |   |   |
| "Viruses;Uroviricota;Caudoviricetes;Caudoviricetes__na;Herelleviridae;Sepunavirus;Sepunavirus__uc"                  | 0 |   |   |   |   |    |   |    |   |   |   | 0 |
|                                                                                                                     | 0 | 0 | 0 | 0 | 0 | 0  | 0 | 0  | 0 | 0 | 0 | 0 |
|                                                                                                                     | 0 | 0 | 0 | 0 | 0 | 0  | 0 | 0  | 0 | 0 | 0 | 0 |
|                                                                                                                     | 0 | 0 | 0 | 0 | 0 | 0  | 0 | 0  | 0 | 0 | 0 | 0 |
|                                                                                                                     | 0 | 0 | 0 | 0 | 0 | 0  | 0 | 0  | 0 | 0 | 0 | 0 |
|                                                                                                                     | 0 | 0 | 0 | 0 | 0 | 57 | 0 | 0  | 0 | 0 | 0 | 0 |
|                                                                                                                     | 0 | 0 | 0 | 0 | 0 |    |   |    |   |   |   |   |
| "Viruses;Uroviricota;Caudoviricetes;Caudoviricetes__na;Herelleviridae;Sepunavirus;Staphylococcus_phage_Twillingate" | 0 | 0 | 0 | 0 | 0 | 0  | 0 | 0  | 0 | 0 | 0 | 0 |
|                                                                                                                     | 0 | 0 | 0 | 0 | 0 | 0  | 0 | 0  | 0 | 0 | 0 | 0 |
|                                                                                                                     | 0 | 0 | 0 | 0 | 0 | 0  | 0 | 0  | 0 | 0 | 0 | 0 |
|                                                                                                                     | 0 | 0 | 0 | 0 | 0 | 0  | 0 | 11 | 0 | 0 | 0 | 0 |

[illegible]

[illegible]

[illegible]

|                                                                                                                       |   |   |    |   |   |    |   |    |    |   |   |   |
|-----------------------------------------------------------------------------------------------------------------------|---|---|----|---|---|----|---|----|----|---|---|---|
| 0                                                                                                                     | 0 | 0 | 0  | 0 | 0 | 0  | 0 | 0  | 0  | 0 | 0 | 0 |
| 0                                                                                                                     | 0 | 0 | 0  | 0 | 0 |    |   |    |    |   |   |   |
| "Viruses;Uroviricota;Caudoviricetes;Caudoviricetes__na;Pachyviridae;Bacelvirus;Bacelvirus_phi46tres"                  | 0 |   |    |   |   |    |   |    |    |   |   |   |
| 0                                                                                                                     | 0 | 0 | 0  | 0 | 0 | 0  | 0 | 0  | 0  | 0 | 0 | 0 |
| 0                                                                                                                     | 0 | 0 | 0  | 0 | 0 | 0  | 0 | 0  | 0  | 0 | 0 | 0 |
| 0                                                                                                                     | 0 | 0 | 0  | 0 | 0 | 0  | 0 | 0  | 0  | 0 | 0 | 0 |
| 0                                                                                                                     | 0 | 0 | 0  | 0 | 0 | 0  | 0 | 0  | 0  | 0 | 0 | 1 |
| 0                                                                                                                     | 0 | 0 | 0  | 0 | 0 | 0  | 0 | 0  | 0  | 0 | 0 | 0 |
| 0                                                                                                                     | 0 | 0 | 0  | 0 | 0 |    |   |    |    |   |   |   |
| "Viruses;Uroviricota;Caudoviricetes;Caudoviricetes__na;Pachyviridae;Baltivirus;Baltivirus_phi19tres"                  | 0 |   |    |   |   |    |   |    |    |   |   |   |
| 0                                                                                                                     | 0 | 0 | 16 | 0 | 0 | 0  | 0 | 0  | 0  | 0 | 0 | 0 |
| 0                                                                                                                     | 0 | 0 | 0  | 0 | 0 | 0  | 0 | 0  | 0  | 0 | 0 | 0 |
| 0                                                                                                                     | 0 | 0 | 0  | 0 | 0 | 0  | 0 | 0  | 0  | 0 | 0 | 0 |
| 0                                                                                                                     | 0 | 0 | 0  | 0 | 0 | 0  | 0 | 0  | 0  | 0 | 0 | 0 |
| 0                                                                                                                     | 0 | 0 | 0  | 0 | 0 | 0  | 0 | 0  | 0  | 0 | 0 | 0 |
| 0                                                                                                                     | 0 | 0 | 0  | 0 | 0 |    |   |    |    |   |   |   |
| "Viruses;Uroviricota;Caudoviricetes;Caudoviricetes__na;Peduoviridae;Peduoviridae__na;Escherichia_phage_vB_EcoM-813R9" | 0 | 0 | 0  | 1 | 0 | 0  | 0 | 0  | 0  | 0 | 0 | 0 |
| 0                                                                                                                     | 0 | 0 | 0  | 0 | 0 | 1  | 0 | 0  | 0  | 0 | 0 | 0 |
| 0                                                                                                                     | 0 | 0 | 0  | 0 | 0 | 0  | 0 | 0  | 0  | 0 | 0 | 0 |
| 0                                                                                                                     | 0 | 0 | 0  | 0 | 0 | 0  | 0 | 0  | 0  | 0 | 0 | 0 |
| 0                                                                                                                     | 0 | 0 | 0  | 0 | 0 | 0  | 0 | 0  | 7  | 1 | 0 | 0 |
| 0                                                                                                                     | 0 | 0 | 0  | 0 | 0 | 0  | 0 |    |    |   |   |   |
| "Viruses;Uroviricota;Caudoviricetes;Caudoviricetes__na;Peduoviridae;Peduovirus;Escherichia_phage_vB_EcoM-720R8"       | 0 | 0 | 0  | 0 | 0 | 0  | 0 | 0  | 0  | 0 | 0 | 0 |
| 0                                                                                                                     | 0 | 0 | 0  | 0 | 0 | 0  | 0 | 0  | 0  | 0 | 0 | 0 |
| 0                                                                                                                     | 0 | 0 | 0  | 0 | 0 | 0  | 0 | 0  | 0  | 0 | 0 | 0 |
| 0                                                                                                                     | 0 | 0 | 0  | 0 | 0 | 0  | 0 | 0  | 0  | 0 | 0 | 0 |
| 0                                                                                                                     | 0 | 0 | 0  | 0 | 0 | 0  | 0 | 13 | 2  | 0 | 0 | 0 |
| 0                                                                                                                     | 0 | 0 | 0  | 0 | 0 | 0  |   |    |    |   |   |   |
| "Viruses;Uroviricota;Caudoviricetes;Caudoviricetes__na;Peduoviridae;Quadragevirus;Quadragevirus_ev129"                | 0 | 0 | 0  | 1 | 0 | 0  | 0 | 0  | 0  | 0 | 0 | 0 |
| 0                                                                                                                     | 0 | 0 | 0  | 0 | 0 | 0  | 0 | 0  | 0  | 0 | 0 | 0 |
| 0                                                                                                                     | 0 | 0 | 0  | 0 | 0 | 0  | 0 | 0  | 0  | 0 | 0 | 0 |
| 0                                                                                                                     | 0 | 0 | 0  | 0 | 0 | 0  | 0 | 0  | 0  | 0 | 0 | 0 |
| 0                                                                                                                     | 0 | 0 | 0  | 0 | 0 | 0  | 0 | 0  | 0  | 0 | 0 | 0 |
| 0                                                                                                                     | 0 | 0 | 0  | 0 | 0 | 0  |   |    |    |   |   |   |
| "Viruses;Uroviricota;Caudoviricetes;Caudoviricetes__na;Peduoviridae;Xuanwuvirus;Xuanwuvirus_xv503458"                 | 0 | 0 | 0  | 0 | 0 | 0  | 0 | 0  | 0  | 0 | 0 | 0 |
| 0                                                                                                                     | 0 | 0 | 0  | 0 | 0 | 0  | 0 | 0  | 0  | 0 | 0 | 0 |
| 0                                                                                                                     | 0 | 0 | 0  | 0 | 0 | 0  | 0 | 0  | 0  | 0 | 0 | 0 |
| 0                                                                                                                     | 0 | 0 | 0  | 0 | 0 | 0  | 0 | 0  | 0  | 0 | 0 | 0 |
| 0                                                                                                                     | 0 | 0 | 0  | 0 | 0 | 0  | 0 | 1  | 0  | 0 | 0 | 0 |
| 0                                                                                                                     | 0 | 0 | 0  | 0 | 0 | 0  |   |    |    |   |   |   |
| "Viruses;Uroviricota;Caudoviricetes;Caudoviricetes__na;Rountreeviridae;Andhravirus;Andhravirus__uc"                   | 0 | 0 | 0  | 0 | 0 | 0  | 0 | 0  | 27 | 0 | 0 | 0 |
| 0                                                                                                                     | 0 | 0 | 0  | 0 | 0 | 0  | 0 | 0  | 0  | 0 | 0 | 0 |
| 0                                                                                                                     | 0 | 0 | 0  | 0 | 0 | 0  | 0 | 0  | 0  | 0 | 0 | 0 |
| 0                                                                                                                     | 0 | 0 | 0  | 0 | 0 | 51 | 0 | 0  | 0  | 0 | 0 | 0 |

|                                                                                                                       |   |   |   |   |   |   |    |    |   |    |   |   |
|-----------------------------------------------------------------------------------------------------------------------|---|---|---|---|---|---|----|----|---|----|---|---|
| 0                                                                                                                     | 0 | 0 | 0 | 0 | 0 | 0 | 0  | 0  | 0 | 0  | 0 | 0 |
| 0                                                                                                                     | 0 | 0 | 0 | 0 | 0 |   |    |    |   |    |   |   |
| "Viruses;Uroviricota;Caudoviricetes;Caudoviricetes__na;Rountreeviridae;Andhravirus;Andhravirus_andhra"                |   |   |   |   |   |   |    |    |   |    |   |   |
| 0                                                                                                                     | 0 | 0 | 0 | 0 | 0 | 0 | 0  | 0  | 0 | 26 | 0 | 0 |
| 0                                                                                                                     | 0 | 0 | 0 | 0 | 0 | 0 | 0  | 0  | 0 | 0  | 0 | 0 |
| 0                                                                                                                     | 0 | 0 | 0 | 0 | 0 | 0 | 0  | 0  | 0 | 0  | 0 | 0 |
| 0                                                                                                                     | 0 | 0 | 0 | 0 | 0 | 0 | 17 | 0  | 0 | 0  | 0 | 0 |
| 0                                                                                                                     | 0 | 0 | 0 | 0 | 0 | 0 | 0  | 0  | 0 | 0  | 0 | 0 |
| 0                                                                                                                     | 0 | 0 | 0 | 0 | 0 | 0 |    |    |   |    |   |   |
| "Viruses;Uroviricota;Caudoviricetes;Caudoviricetes__na;Rountreeviridae;Andhravirus;Andhravirus_St134"                 |   |   |   |   |   |   |    |    |   |    |   |   |
| 0                                                                                                                     | 0 | 0 | 0 | 0 | 0 | 0 | 0  | 0  | 0 | 0  | 0 | 0 |
| 0                                                                                                                     | 0 | 0 | 0 | 0 | 0 | 0 | 0  | 0  | 0 | 0  | 0 | 0 |
| 0                                                                                                                     | 0 | 0 | 0 | 0 | 0 | 0 | 0  | 0  | 0 | 0  | 0 | 0 |
| 0                                                                                                                     | 0 | 0 | 0 | 0 | 0 | 0 | 72 | 0  | 0 | 0  | 0 | 0 |
| 0                                                                                                                     | 0 | 0 | 0 | 0 | 0 | 0 | 0  | 0  | 0 | 0  | 0 | 0 |
| 0                                                                                                                     | 0 | 0 | 0 | 0 | 0 | 0 |    |    |   |    |   |   |
| "Viruses;Uroviricota;Caudoviricetes;Caudoviricetes__na;Rountreeviridae;Andhravirus;Staphylococcus_phage_vB_SepP_BE03" |   |   |   |   |   |   |    |    |   |    |   |   |
| 0                                                                                                                     | 0 | 0 | 0 | 0 | 0 | 0 | 0  | 0  | 0 | 0  | 0 | 0 |
| 0                                                                                                                     | 0 | 0 | 0 | 0 | 0 | 0 | 0  | 0  | 0 | 0  | 0 | 0 |
| 0                                                                                                                     | 0 | 0 | 0 | 0 | 0 | 0 | 0  | 0  | 0 | 1  | 0 | 0 |
| 0                                                                                                                     | 0 | 0 | 0 | 0 | 0 | 0 | 0  | 0  | 0 | 0  | 0 | 0 |
| 0                                                                                                                     | 0 | 0 | 0 | 0 | 0 | 0 | 0  | 0  | 0 | 0  | 0 | 0 |
| 0                                                                                                                     | 0 | 0 | 0 | 0 | 0 | 0 | 0  |    |   |    |   |   |
| "Viruses;Uroviricota;Caudoviricetes;Caudoviricetes__na;Rountreeviridae;Andhravirus;Staphylococcus_phage_vB_SurP-PSU3" |   |   |   |   |   |   |    |    |   |    |   |   |
| 0                                                                                                                     | 0 | 0 | 0 | 0 | 0 | 0 | 0  | 0  | 0 | 0  | 0 | 0 |
| 0                                                                                                                     | 0 | 0 | 0 | 0 | 0 | 0 | 0  | 0  | 0 | 0  | 0 | 0 |
| 0                                                                                                                     | 0 | 0 | 0 | 0 | 0 | 0 | 0  | 0  | 0 | 2  | 0 | 0 |
| 0                                                                                                                     | 0 | 0 | 0 | 0 | 0 | 0 | 0  | 23 | 0 | 0  | 0 | 0 |
| 0                                                                                                                     | 0 | 0 | 0 | 0 | 0 | 0 | 0  | 0  | 0 | 0  | 0 | 0 |
| 0                                                                                                                     | 0 | 0 | 0 | 0 | 0 | 0 | 0  |    |   |    |   |   |
| "Viruses;Uroviricota;Caudoviricetes;Caudoviricetes__na;Salasmaviridae;Beecentumtrevirus;Beecentumtrevirus__uc"        |   |   |   |   |   |   |    |    |   |    |   |   |
| 0                                                                                                                     | 0 | 0 | 0 | 0 | 0 | 0 | 0  | 0  | 0 | 0  | 0 | 0 |
| 0                                                                                                                     | 0 | 0 | 0 | 0 | 0 | 2 | 0  | 0  | 0 | 0  | 0 | 0 |
| 0                                                                                                                     | 0 | 0 | 0 | 0 | 0 | 0 | 0  | 0  | 0 | 0  | 0 | 0 |
| 0                                                                                                                     | 0 | 0 | 0 | 0 | 0 | 0 | 0  | 0  | 0 | 0  | 0 | 0 |
| 0                                                                                                                     | 5 | 0 | 0 | 0 | 0 | 0 | 0  | 0  | 0 | 0  | 0 | 0 |
| 0                                                                                                                     | 1 | 0 | 0 | 0 | 0 | 0 |    |    |   |    |   |   |
| "Viruses;Uroviricota;Caudoviricetes;Caudoviricetes__na;Salasmaviridae;Beecentumtrevirus;Beecentumtrevirus_B103"       |   |   |   |   |   |   |    |    |   |    |   |   |
| 0                                                                                                                     | 0 | 0 | 0 | 0 | 0 | 0 | 0  | 0  | 0 | 0  | 0 | 0 |
| 0                                                                                                                     | 0 | 0 | 0 | 0 | 0 | 0 | 0  | 0  | 0 | 0  | 0 | 0 |
| 0                                                                                                                     | 0 | 0 | 0 | 0 | 0 | 0 | 0  | 0  | 0 | 0  | 0 | 0 |
| 0                                                                                                                     | 0 | 0 | 0 | 0 | 0 | 0 | 0  | 0  | 0 | 0  | 0 | 0 |
| 0                                                                                                                     | 0 | 1 | 0 | 0 | 0 | 0 | 0  | 0  | 0 | 0  | 0 | 0 |
| 0                                                                                                                     | 0 | 0 | 0 | 0 | 0 | 0 |    |    |   |    |   |   |
| "Viruses;Uroviricota;Caudoviricetes;Caudoviricetes__na;Salasmaviridae;Gaunavirus;Gaunavirus_GA1"                      |   |   |   |   |   |   |    |    |   |    |   |   |
| 0                                                                                                                     | 0 | 0 | 0 | 0 | 0 | 0 | 0  | 0  | 0 | 0  | 0 | 0 |
| 0                                                                                                                     | 0 | 0 | 0 | 0 | 0 | 0 | 0  | 0  | 0 | 0  | 0 | 0 |
| 0                                                                                                                     | 0 | 0 | 0 | 0 | 0 | 0 | 0  | 0  | 0 | 0  | 0 | 0 |
| 0                                                                                                                     | 0 | 0 | 0 | 0 | 0 | 0 | 1  | 0  | 0 | 0  | 0 | 0 |

[illegible]

|                                                                                                         |   |   |   |   |   |   |   |   |   |   |   |   |
|---------------------------------------------------------------------------------------------------------|---|---|---|---|---|---|---|---|---|---|---|---|
| 0                                                                                                       | 0 | 0 | 0 | 0 | 0 | 0 | 0 | 0 | 0 | 0 | 0 | 0 |
| 0                                                                                                       | 0 | 0 | 0 | 0 | 0 | 0 |   |   |   |   |   |   |
| "Viruses;Uroviricota;Caudoviricetes;Caudoviricetes__na;Schitoviridae;Cbunavirus;Cbunavirus__uc"         |   |   |   |   |   |   |   |   |   |   |   | 0 |
| 0                                                                                                       | 1 | 0 | 1 | 0 | 0 | 0 | 0 | 0 | 0 | 0 | 0 | 0 |
| 0                                                                                                       | 0 | 0 | 0 | 0 | 0 | 0 | 0 | 0 | 0 | 0 | 0 | 0 |
| 0                                                                                                       | 0 | 0 | 0 | 0 | 0 | 0 | 0 | 0 | 0 | 0 | 0 | 0 |
| 0                                                                                                       | 0 | 0 | 0 | 0 | 0 | 0 | 0 | 0 | 0 | 0 | 0 | 0 |
| 0                                                                                                       | 0 | 0 | 0 | 0 | 0 | 0 | 0 | 0 | 0 | 0 | 0 | 0 |
| 0                                                                                                       | 0 | 0 | 0 | 0 | 0 | 0 | 0 | 0 | 0 | 0 | 0 | 0 |
| "Viruses;Uroviricota;Caudoviricetes;Caudoviricetes__na;Schitoviridae;Cbunavirus;Cbunavirus_A41"         |   |   |   |   |   |   |   |   |   |   |   | 0 |
| 0                                                                                                       | 0 | 0 | 0 | 1 | 0 | 0 | 0 | 0 | 0 | 0 | 0 | 0 |
| 0                                                                                                       | 0 | 0 | 0 | 0 | 0 | 0 | 0 | 0 | 0 | 0 | 0 | 0 |
| 0                                                                                                       | 0 | 0 | 0 | 0 | 0 | 0 | 0 | 0 | 0 | 0 | 0 | 0 |
| 0                                                                                                       | 0 | 0 | 0 | 0 | 0 | 0 | 0 | 0 | 0 | 0 | 0 | 0 |
| 0                                                                                                       | 0 | 0 | 0 | 0 | 0 | 0 | 0 | 0 | 0 | 0 | 0 | 0 |
| 0                                                                                                       | 0 | 0 | 0 | 0 | 0 | 0 |   |   |   |   |   |   |
| "Viruses;Uroviricota;Caudoviricetes;Caudoviricetes__na;Schitoviridae;Dongdastvirus;Dongdastvirus_Axy24" |   |   |   |   |   |   |   |   |   |   |   |   |
| 0                                                                                                       | 0 | 0 | 1 | 0 | 0 | 0 | 0 | 0 | 0 | 0 | 0 | 0 |
| 0                                                                                                       | 0 | 0 | 0 | 0 | 0 | 0 | 0 | 0 | 0 | 0 | 0 | 0 |
| 0                                                                                                       | 0 | 0 | 0 | 0 | 0 | 0 | 0 | 0 | 0 | 0 | 0 | 0 |
| 0                                                                                                       | 0 | 0 | 0 | 0 | 0 | 0 | 0 | 0 | 0 | 0 | 0 | 0 |
| 0                                                                                                       | 0 | 0 | 0 | 0 | 0 | 0 | 0 | 0 | 0 | 0 | 0 | 0 |
| 0                                                                                                       | 0 | 0 | 0 | 0 | 0 | 0 |   |   |   |   |   |   |
| "Viruses;Uroviricota;Caudoviricetes;Caudoviricetes__na;Schitoviridae;Eceepunavirus;Eceepunavirus_EcP1"  |   |   |   |   |   |   |   |   |   |   |   |   |
| 0                                                                                                       | 0 | 0 | 0 | 8 | 0 | 0 | 0 | 0 | 0 | 0 | 0 | 0 |
| 0                                                                                                       | 0 | 0 | 0 | 0 | 0 | 0 | 0 | 0 | 0 | 0 | 0 | 0 |
| 0                                                                                                       | 0 | 0 | 0 | 0 | 0 | 0 | 0 | 0 | 0 | 0 | 0 | 0 |
| 0                                                                                                       | 0 | 0 | 0 | 0 | 0 | 0 | 0 | 0 | 0 | 0 | 0 | 0 |
| 0                                                                                                       | 0 | 0 | 0 | 0 | 0 | 0 | 0 | 0 | 0 | 0 | 0 | 0 |
| 0                                                                                                       | 0 | 0 | 0 | 0 | 0 | 0 |   |   |   |   |   |   |
| "Viruses;Uroviricota;Caudoviricetes;Caudoviricetes__na;Schitoviridae;Electravirus;Electravirus_Sbp1"    |   |   |   |   |   |   |   |   |   |   |   | 0 |
| 0                                                                                                       | 0 | 0 | 6 | 0 | 0 | 0 | 0 | 0 | 0 | 0 | 0 | 0 |
| 0                                                                                                       | 0 | 0 | 0 | 0 | 0 | 0 | 0 | 0 | 0 | 0 | 0 | 0 |
| 0                                                                                                       | 0 | 0 | 0 | 0 | 0 | 0 | 0 | 0 | 0 | 0 | 0 | 0 |
| 0                                                                                                       | 0 | 0 | 0 | 0 | 0 | 0 | 0 | 0 | 0 | 0 | 0 | 0 |
| 0                                                                                                       | 0 | 0 | 0 | 0 | 0 | 0 | 0 | 0 | 0 | 0 | 0 | 0 |
| 0                                                                                                       | 0 | 0 | 0 | 0 | 0 | 0 |   |   |   |   |   |   |
| "Viruses;Uroviricota;Caudoviricetes;Caudoviricetes__na;Schitoviridae;Enquatrovirus;Enquatrovirus__uc"   |   |   |   |   |   |   |   |   |   |   |   | 0 |
| 0                                                                                                       | 0 | 0 | 0 | 0 | 0 | 0 | 0 | 0 | 0 | 0 | 0 | 0 |
| 0                                                                                                       | 0 | 0 | 0 | 0 | 0 | 0 | 0 | 0 | 0 | 0 | 0 | 0 |
| 0                                                                                                       | 0 | 0 | 0 | 0 | 0 | 0 | 0 | 3 | 0 | 0 | 0 | 0 |
| 0                                                                                                       | 0 | 0 | 0 | 0 | 0 | 0 | 1 | 0 | 0 | 0 | 0 | 0 |
| 0                                                                                                       | 0 | 0 | 0 | 0 | 0 | 0 | 0 | 0 | 0 | 0 | 0 | 0 |
| 0                                                                                                       | 0 | 0 | 0 | 0 | 0 | 0 |   |   |   |   |   |   |
| "Viruses;Uroviricota;Caudoviricetes;Caudoviricetes__na;Schitoviridae;Enquatrovirus;uncultured_N4_virus" |   |   |   |   |   |   |   |   |   |   |   |   |
| 0                                                                                                       | 0 | 0 | 0 | 0 | 0 | 0 | 0 | 0 | 0 | 0 | 0 | 0 |
| 0                                                                                                       | 0 | 0 | 0 | 0 | 0 | 0 | 0 | 0 | 0 | 0 | 0 | 0 |
| 0                                                                                                       | 0 | 0 | 0 | 0 | 0 | 0 | 0 | 0 | 0 | 0 | 0 | 0 |
| 0                                                                                                       | 0 | 0 | 0 | 0 | 0 | 0 | 0 | 6 | 0 | 0 | 0 | 0 |



|                                                                                                                     |   |   |   |    |   |   |   |   |   |   |   |   |
|---------------------------------------------------------------------------------------------------------------------|---|---|---|----|---|---|---|---|---|---|---|---|
| 0                                                                                                                   | 0 | 0 | 0 | 0  | 0 | 0 | 0 | 0 | 0 | 0 | 0 | 0 |
| 0                                                                                                                   | 0 | 0 | 0 | 0  | 0 | 0 |   |   |   |   |   |   |
| "Viruses;Uroviricota;Caudoviricetes;Caudoviricetes__na;Schitoviridae;Exceevirus;Exceevirus_Xc38"                    |   |   |   |    |   |   |   |   |   |   |   | 0 |
| 0                                                                                                                   | 0 | 0 | 2 | 0  | 0 | 0 | 0 | 1 | 0 | 0 | 0 | 0 |
| 0                                                                                                                   | 0 | 0 | 0 | 0  | 0 | 0 | 0 | 0 | 0 | 0 | 0 | 0 |
| 0                                                                                                                   | 0 | 0 | 0 | 0  | 0 | 0 | 0 | 0 | 0 | 0 | 0 | 0 |
| 0                                                                                                                   | 0 | 0 | 0 | 0  | 0 | 0 | 0 | 0 | 0 | 0 | 0 | 0 |
| 0                                                                                                                   | 0 | 0 | 0 | 0  | 0 | 0 | 0 | 0 | 0 | 0 | 0 | 0 |
| 0                                                                                                                   | 0 | 0 | 0 | 0  | 0 | 0 | 0 | 0 | 0 | 0 | 0 | 0 |
| 0                                                                                                                   | 0 | 0 | 0 | 0  | 0 |   |   |   |   |   |   |   |
| "Viruses;Uroviricota;Caudoviricetes;Caudoviricetes__na;Schitoviridae;Gamaleyavirus;Gamaleyavirus__uc"               |   |   |   |    |   |   |   |   |   |   |   |   |
| 0                                                                                                                   | 0 | 0 | 0 | 0  | 0 | 0 | 0 | 0 | 0 | 0 | 0 | 0 |
| 0                                                                                                                   | 0 | 0 | 0 | 0  | 0 | 0 | 0 | 0 | 0 | 0 | 0 | 0 |
| 0                                                                                                                   | 0 | 0 | 0 | 0  | 0 | 0 | 0 | 0 | 5 | 0 | 0 | 0 |
| 0                                                                                                                   | 0 | 0 | 0 | 0  | 0 | 0 | 0 | 0 | 0 | 0 | 0 | 0 |
| 0                                                                                                                   | 0 | 0 | 0 | 0  | 0 | 0 | 0 | 0 | 0 | 0 | 0 | 0 |
| 0                                                                                                                   | 0 | 0 | 0 | 0  | 0 | 0 |   |   |   |   |   |   |
| "Viruses;Uroviricota;Caudoviricetes;Caudoviricetes__na;Schitoviridae;Huelvavirus;Huelvavirus_ort11"                 |   |   |   |    |   |   |   |   |   |   |   | 0 |
| 0                                                                                                                   | 0 | 0 | 0 | 0  | 0 | 0 | 0 | 0 | 0 | 0 | 0 | 0 |
| 0                                                                                                                   | 0 | 0 | 0 | 0  | 0 | 0 | 0 | 0 | 0 | 0 | 0 | 0 |
| 0                                                                                                                   | 0 | 0 | 0 | 0  | 0 | 0 | 0 | 0 | 0 | 0 | 0 | 0 |
| 0                                                                                                                   | 0 | 0 | 0 | 0  | 0 | 0 | 2 | 0 | 0 | 0 | 0 | 0 |
| 0                                                                                                                   | 0 | 0 | 0 | 0  | 0 | 0 | 0 | 0 | 0 | 0 | 0 | 0 |
| 0                                                                                                                   | 0 | 0 | 0 | 0  | 0 |   |   |   |   |   |   |   |
| "Viruses;Uroviricota;Caudoviricetes;Caudoviricetes__na;Schitoviridae;Johnsonvirus;Johnsonvirus__uc"                 |   |   |   |    |   |   |   |   |   |   |   | 4 |
| 0                                                                                                                   | 0 | 0 | 0 | 22 | 0 | 0 | 0 | 0 | 0 | 0 | 0 | 0 |
| 0                                                                                                                   | 0 | 0 | 0 | 0  | 0 | 0 | 0 | 0 | 0 | 0 | 0 | 0 |
| 0                                                                                                                   | 0 | 0 | 0 | 0  | 0 | 0 | 0 | 0 | 0 | 0 | 0 | 0 |
| 0                                                                                                                   | 0 | 0 | 0 | 0  | 0 | 0 | 0 | 0 | 0 | 0 | 0 | 0 |
| 0                                                                                                                   | 0 | 0 | 0 | 0  | 0 | 0 | 0 | 0 | 0 | 0 | 0 | 0 |
| 0                                                                                                                   | 0 | 0 | 0 | 0  | 0 |   |   |   |   |   |   |   |
| "Viruses;Uroviricota;Caudoviricetes;Caudoviricetes__na;Schitoviridae;Johnsonvirus;Johnsonvirus_frozen"              |   |   |   |    |   |   |   |   |   |   |   |   |
| 0                                                                                                                   | 0 | 0 | 1 | 0  | 0 | 0 | 0 | 0 | 0 | 0 | 0 | 0 |
| 0                                                                                                                   | 0 | 0 | 0 | 0  | 0 | 0 | 0 | 0 | 0 | 0 | 0 | 0 |
| 0                                                                                                                   | 0 | 0 | 0 | 0  | 0 | 0 | 0 | 0 | 0 | 0 | 0 | 0 |
| 0                                                                                                                   | 0 | 0 | 0 | 0  | 0 | 0 | 0 | 0 | 0 | 0 | 0 | 0 |
| 0                                                                                                                   | 0 | 0 | 0 | 0  | 0 | 0 | 0 | 0 | 0 | 0 | 0 | 0 |
| 0                                                                                                                   | 0 | 0 | 0 | 0  | 0 | 0 |   |   |   |   |   |   |
| "Viruses;Uroviricota;Caudoviricetes;Caudoviricetes__na;Schitoviridae;Littlefixvirus;Littlefixvirus__uc"             |   |   |   |    |   |   |   |   |   |   |   | 0 |
| 0                                                                                                                   | 0 | 1 | 0 | 0  | 0 | 0 | 0 | 0 | 0 | 0 | 0 | 0 |
| 0                                                                                                                   | 0 | 0 | 0 | 0  | 0 | 0 | 0 | 0 | 0 | 0 | 0 | 0 |
| 0                                                                                                                   | 0 | 0 | 0 | 0  | 0 | 0 | 0 | 0 | 0 | 0 | 0 | 0 |
| 0                                                                                                                   | 0 | 0 | 0 | 0  | 0 | 0 | 0 | 0 | 0 | 0 | 0 | 0 |
| 0                                                                                                                   | 0 | 0 | 0 | 0  | 0 | 0 | 0 | 0 | 0 | 0 | 0 | 0 |
| 0                                                                                                                   | 0 | 0 | 0 | 0  | 0 |   |   |   |   |   |   |   |
| "Viruses;Uroviricota;Caudoviricetes;Caudoviricetes__na;Schitoviridae;Littlefixvirus;Pseudomonas_phage_98Pfl uR60PP" |   |   |   |    |   |   |   |   |   |   |   |   |
| 0                                                                                                                   | 0 | 0 | 0 | 1  | 0 | 0 | 0 | 0 | 0 | 0 | 0 | 0 |
| 0                                                                                                                   | 0 | 0 | 0 | 0  | 0 | 0 | 0 | 0 | 0 | 0 | 0 | 0 |
| 0                                                                                                                   | 0 | 0 | 0 | 0  | 0 | 0 | 0 | 0 | 0 | 0 | 0 | 0 |
| 0                                                                                                                   | 0 | 0 | 0 | 0  | 0 | 0 | 0 | 0 | 2 | 0 | 0 | 0 |

[illegible]

[illegible]

|                                                                                                                |   |   |   |   |   |   |   |   |   |   |   |   |
|----------------------------------------------------------------------------------------------------------------|---|---|---|---|---|---|---|---|---|---|---|---|
|                                                                                                                | 0 | 0 | 0 | 0 | 0 | 0 | 0 | 0 | 0 | 0 | 0 | 0 |
|                                                                                                                | 0 | 0 | 0 | 0 | 0 | 0 |   |   |   |   |   |   |
| "Viruses;Uroviricota;Caudoviricetes;Caudoviricetes__na;Schitoviridae;Raunefjordenvirus;Raunefjordenvirus_C     |   |   |   |   |   |   |   |   |   |   |   |   |
| B2047B"                                                                                                        | 0 | 0 | 0 | 0 | 3 | 2 | 0 | 0 | 0 | 0 | 0 | 0 |
|                                                                                                                | 0 | 0 | 0 | 0 | 0 | 0 | 0 | 0 | 0 | 0 | 0 | 0 |
|                                                                                                                | 0 | 0 | 0 | 0 | 0 | 0 | 0 | 0 | 0 | 0 | 0 | 0 |
|                                                                                                                | 0 | 0 | 0 | 0 | 0 | 0 | 0 | 0 | 0 | 0 | 0 | 0 |
|                                                                                                                | 0 | 0 | 0 | 0 | 0 | 0 | 0 | 0 | 0 | 0 | 0 | 0 |
|                                                                                                                | 0 | 0 | 0 | 0 | 0 | 0 | 0 | 0 | 0 | 0 | 0 | 0 |
|                                                                                                                | 0 | 0 | 0 | 0 | 0 | 0 |   |   |   |   |   |   |
| "Viruses;Uroviricota;Caudoviricetes;Caudoviricetes__na;Schitoviridae;Riverridervirus;Riverridervirus_riverride |   |   |   |   |   |   |   |   |   |   |   |   |
| r"                                                                                                             | 1 | 0 | 0 | 0 | 0 | 0 | 0 | 0 | 0 | 0 | 0 | 0 |
|                                                                                                                | 0 | 0 | 0 | 0 | 0 | 0 | 0 | 0 | 0 | 0 | 0 | 0 |
|                                                                                                                | 0 | 0 | 0 | 0 | 0 | 0 | 0 | 0 | 0 | 0 | 0 | 0 |
|                                                                                                                | 0 | 0 | 4 | 0 | 0 | 0 | 0 | 0 | 6 | 0 | 0 | 0 |
|                                                                                                                | 0 | 0 | 0 | 0 | 0 | 0 | 0 | 0 | 0 | 0 | 0 | 0 |
|                                                                                                                | 0 | 0 | 0 | 0 | 0 | 0 | 0 |   |   |   |   |   |
| "Viruses;Uroviricota;Caudoviricetes;Caudoviricetes__na;Schitoviridae;Sanyabayvirus;Sanyabayvirus_DS1410W       |   |   |   |   |   |   |   |   |   |   |   |   |
| s06"                                                                                                           | 0 | 0 | 0 | 0 | 0 | 3 | 0 | 0 | 0 | 0 | 0 | 0 |
|                                                                                                                | 0 | 0 | 0 | 0 | 0 | 0 | 0 | 0 | 0 | 0 | 0 | 0 |
|                                                                                                                | 0 | 0 | 0 | 0 | 0 | 0 | 0 | 0 | 0 | 0 | 0 | 0 |
|                                                                                                                | 0 | 0 | 0 | 0 | 0 | 0 | 0 | 0 | 1 | 0 | 0 | 0 |
|                                                                                                                | 0 | 0 | 0 | 0 | 0 | 0 | 0 | 0 | 0 | 0 | 0 | 0 |
|                                                                                                                | 0 | 0 | 0 | 0 | 0 | 0 | 0 |   |   |   |   |   |
| "Viruses;Uroviricota;Caudoviricetes;Caudoviricetes__na;Schitoviridae;Schitoviridae__na;Acinetobacter_phage_    |   |   |   |   |   |   |   |   |   |   |   |   |
| nACB1"                                                                                                         | 0 | 0 | 0 | 0 | 1 | 0 | 0 | 0 | 0 | 0 | 0 | 0 |
|                                                                                                                | 0 | 0 | 0 | 0 | 0 | 0 | 0 | 0 | 0 | 0 | 0 | 0 |
|                                                                                                                | 0 | 0 | 0 | 0 | 0 | 0 | 0 | 0 | 0 | 0 | 0 | 0 |
|                                                                                                                | 0 | 0 | 0 | 0 | 0 | 0 | 0 | 0 | 0 | 0 | 0 | 0 |
|                                                                                                                | 0 | 0 | 0 | 0 | 0 | 0 | 0 | 0 | 0 | 0 | 0 | 0 |
|                                                                                                                | 0 | 0 | 0 | 0 | 0 | 0 | 0 |   |   |   |   |   |
| "Viruses;Uroviricota;Caudoviricetes;Caudoviricetes__na;Schitoviridae;Schitoviridae__na;Podoviridae_sp_ctda_    |   |   |   |   |   |   |   |   |   |   |   |   |
| 1"                                                                                                             | 0 | 0 | 2 | 2 | 7 | 0 | 0 | 0 | 0 | 0 | 0 | 0 |
|                                                                                                                | 0 | 0 | 0 | 0 | 0 | 0 | 0 | 0 | 0 | 0 | 0 | 0 |
|                                                                                                                | 0 | 0 | 0 | 0 | 0 | 0 | 0 | 0 | 0 | 2 | 0 | 0 |
|                                                                                                                | 0 | 0 | 0 | 0 | 0 | 0 | 0 | 0 | 0 | 0 | 0 | 0 |
|                                                                                                                | 0 | 0 | 0 | 0 | 0 | 0 | 0 | 0 | 0 | 0 | 0 | 0 |
|                                                                                                                | 0 | 0 | 0 | 0 | 0 | 0 | 0 |   |   |   |   |   |
| "Viruses;Uroviricota;Caudoviricetes;Caudoviricetes__na;Schitoviridae;Schitoviridae__na;Stenotrophomonas_ph     |   |   |   |   |   |   |   |   |   |   |   |   |
| age_C121"                                                                                                      | 0 | 0 | 0 | 0 | 8 | 0 | 0 | 0 | 0 | 0 | 0 | 0 |
|                                                                                                                | 0 | 0 | 0 | 0 | 0 | 0 | 0 | 0 | 0 | 0 | 0 | 0 |
|                                                                                                                | 0 | 0 | 0 | 0 | 0 | 0 | 0 | 0 | 0 | 0 | 0 | 0 |
|                                                                                                                | 0 | 0 | 0 | 0 | 0 | 0 | 0 | 0 | 0 | 0 | 0 | 0 |
|                                                                                                                | 0 | 0 | 0 | 0 | 0 | 0 | 0 | 0 | 0 | 0 | 0 | 0 |
|                                                                                                                | 0 | 0 | 0 | 0 | 0 | 0 | 0 |   |   |   |   |   |
| "Viruses;Uroviricota;Caudoviricetes;Caudoviricetes__na;Schitoviridae;Schitoviridae__na;Stenotrophomonas_ph     |   |   |   |   |   |   |   |   |   |   |   |   |
| age_Philippe"                                                                                                  | 0 | 0 | 0 | 0 | 0 | 0 | 0 | 0 | 0 | 0 | 0 | 0 |
|                                                                                                                | 0 | 0 | 0 | 0 | 0 | 0 | 0 | 0 | 0 | 0 | 0 | 0 |
|                                                                                                                | 0 | 0 | 0 | 0 | 0 | 0 | 0 | 0 | 0 | 0 | 0 | 0 |
|                                                                                                                | 0 | 0 | 0 | 0 | 0 | 0 | 0 | 0 | 3 | 0 | 0 | 0 |

[illegible]

[illegible]

[illegible]

[illegible]



[illegible]

|                                                                                                           |   |   |    |    |    |   |   |   |   |   |   |   |
|-----------------------------------------------------------------------------------------------------------|---|---|----|----|----|---|---|---|---|---|---|---|
| 0                                                                                                         | 0 | 0 | 0  | 0  | 0  | 0 | 0 | 0 | 0 | 0 | 0 | 0 |
| 0                                                                                                         | 0 | 0 | 0  | 0  | 0  | 0 |   |   |   |   |   |   |
| "Viruses;Uroviricota;Caudoviricetes;Caudoviricetes__na;Zobellviridae;Paundecimvirus;Paundecimvirus__uc"   |   |   |    |    |    |   |   |   |   |   |   |   |
| 0                                                                                                         | 0 | 0 | 0  | 2  | 0  | 0 | 0 | 0 | 0 | 0 | 0 | 0 |
| 0                                                                                                         | 0 | 0 | 0  | 0  | 0  | 0 | 0 | 0 | 2 | 0 | 0 | 0 |
| 0                                                                                                         | 0 | 0 | 0  | 0  | 0  | 0 | 0 | 0 | 0 | 0 | 0 | 0 |
| 0                                                                                                         | 0 | 0 | 0  | 0  | 0  | 0 | 0 | 0 | 0 | 0 | 0 | 0 |
| 0                                                                                                         | 0 | 0 | 0  | 0  | 0  | 0 | 0 | 0 | 0 | 0 | 0 | 0 |
| 0                                                                                                         | 0 | 0 | 0  | 0  | 0  | 0 |   |   |   |   |   |   |
| "Viruses;Uroviricota;Caudoviricetes;Caudoviricetes__na;Zobellviridae;Paundecimvirus;Paundecimvirus_PA11"  |   |   |    |    |    |   |   |   |   |   |   |   |
| 1                                                                                                         | 0 | 0 | 1  | 0  | 0  | 0 | 0 | 0 | 0 | 0 | 0 | 0 |
| 0                                                                                                         | 0 | 0 | 0  | 0  | 0  | 0 | 0 | 0 | 0 | 0 | 0 | 0 |
| 0                                                                                                         | 0 | 0 | 0  | 0  | 0  | 0 | 0 | 0 | 0 | 0 | 0 | 0 |
| 0                                                                                                         | 0 | 0 | 0  | 0  | 0  | 0 | 0 | 0 | 0 | 0 | 0 | 0 |
| 0                                                                                                         | 0 | 0 | 0  | 0  | 0  | 0 | 0 | 0 | 0 | 0 | 0 | 0 |
| 0                                                                                                         | 0 | 0 | 0  | 0  | 0  | 0 |   |   |   |   |   |   |
| "Viruses;Uroviricota;Caudoviricetes;Caudoviricetes__na;Zobellviridae;Salinivirus;Salinivirus_utanense" 1  |   |   |    |    |    |   |   |   |   |   |   |   |
| 0                                                                                                         | 1 | 2 | 13 | 32 | 0  | 0 | 0 | 0 | 0 | 0 | 0 | 0 |
| 0                                                                                                         | 0 | 0 | 0  | 0  | 0  | 0 | 0 | 0 | 0 | 0 | 0 | 0 |
| 0                                                                                                         | 0 | 0 | 0  | 0  | 0  | 0 | 0 | 0 | 0 | 0 | 0 | 0 |
| 0                                                                                                         | 0 | 0 | 0  | 1  | 0  | 0 | 2 | 0 | 0 | 0 | 0 | 0 |
| 0                                                                                                         | 0 | 0 | 0  | 0  | 0  | 0 | 0 | 0 | 0 | 0 | 0 | 0 |
| 0                                                                                                         | 0 | 0 | 0  | 0  | 0  |   |   |   |   |   |   |   |
| "Viruses;Uroviricota;Caudoviricetes;Caudoviricetes__na;Zobellviridae;Veravirus;Roseobacter_phage_CRP-4"   |   |   |    |    |    |   |   |   |   |   |   |   |
| 0                                                                                                         | 0 | 1 | 0  | 11 | 0  | 0 | 0 | 0 | 0 | 0 | 0 | 0 |
| 0                                                                                                         | 0 | 0 | 0  | 0  | 0  | 0 | 0 | 0 | 0 | 0 | 0 | 0 |
| 0                                                                                                         | 0 | 0 | 0  | 0  | 0  | 0 | 0 | 0 | 0 | 0 | 0 | 0 |
| 0                                                                                                         | 0 | 0 | 0  | 0  | 0  | 0 | 0 | 1 | 0 | 0 | 0 | 0 |
| 0                                                                                                         | 0 | 0 | 0  | 0  | 0  | 0 | 0 | 0 | 0 | 0 | 0 | 0 |
| 0                                                                                                         | 0 | 0 | 0  | 0  | 0  | 0 |   |   |   |   |   |   |
| "Viruses;Uroviricota;Caudoviricetes;Caudoviricetes__na;Zobellviridae;Veravirus;Roseobacter_phage_CRP-5"   |   |   |    |    |    |   |   |   |   |   |   |   |
| 0                                                                                                         | 0 | 0 | 0  | 0  | 0  | 0 | 0 | 0 | 0 | 0 | 0 | 0 |
| 0                                                                                                         | 0 | 0 | 0  | 0  | 0  | 0 | 0 | 0 | 0 | 0 | 0 | 0 |
| 0                                                                                                         | 0 | 0 | 0  | 0  | 0  | 0 | 0 | 0 | 0 | 0 | 0 | 0 |
| 0                                                                                                         | 0 | 0 | 0  | 0  | 0  | 0 | 0 | 0 | 0 | 0 | 0 | 0 |
| 0                                                                                                         | 0 | 0 | 0  | 0  | 0  | 0 | 0 | 0 | 0 | 0 | 0 | 0 |
| 0                                                                                                         | 0 | 0 | 0  | 0  | 1  | 0 |   |   |   |   |   |   |
| "Viruses;Uroviricota;Caudoviricetes;Caudoviricetes__na;Zobellviridae;Veravirus;Veravirus__uc" 0 0         |   |   |    |    |    |   |   |   |   |   |   |   |
| 0                                                                                                         | 0 | 2 | 10 | 0  | 0  | 0 | 0 | 0 | 0 | 0 | 0 | 0 |
| 0                                                                                                         | 0 | 0 | 0  | 0  | 0  | 0 | 0 | 0 | 0 | 0 | 0 | 0 |
| 0                                                                                                         | 0 | 0 | 0  | 0  | 0  | 0 | 0 | 0 | 0 | 0 | 0 | 0 |
| 0                                                                                                         | 0 | 0 | 0  | 0  | 0  | 0 | 0 | 0 | 0 | 0 | 0 | 0 |
| 0                                                                                                         | 0 | 0 | 0  | 0  | 0  | 0 | 0 | 0 | 0 | 0 | 0 | 0 |
| 0                                                                                                         | 0 | 0 | 0  | 0  |    |   |   |   |   |   |   |   |
| "Viruses;Uroviricota;Caudoviricetes;Caudoviricetes__na;Zobellviridae;Veravirus;Veravirus_septentrionalis" |   |   |    |    |    |   |   |   |   |   |   |   |
| 0                                                                                                         | 0 | 1 | 0  | 18 | 18 | 0 | 0 | 0 | 0 | 0 | 0 | 0 |
| 0                                                                                                         | 0 | 0 | 0  | 0  | 0  | 0 | 0 | 0 | 0 | 0 | 0 | 0 |
| 0                                                                                                         | 0 | 0 | 1  | 0  | 0  | 0 | 0 | 0 | 0 | 0 | 0 | 0 |
| 0                                                                                                         | 0 | 0 | 0  | 0  | 0  | 0 | 0 | 1 | 0 | 0 | 0 | 0 |

[illegible]

|                                                                                                                  |     |      |      |      |      |      |     |     |      |      |      |      |     |
|------------------------------------------------------------------------------------------------------------------|-----|------|------|------|------|------|-----|-----|------|------|------|------|-----|
|                                                                                                                  | 0   | 0    | 0    | 0    | 0    | 0    | 0   | 0   | 0    | 0    | 0    | 0    | 0   |
|                                                                                                                  | 0   | 0    | 0    | 0    | 0    | 0    | 0   |     |      |      |      |      |     |
| "Viruses;Uroviricota;Caudoviricetes;Caudoviricetes__uc;Caudoviricetes__uc;Caudoviricetes__uc;Caudoviricetes__uc" | 10  | 15   | 68   | 89   | 377  | 313  | 0   | 12  | 5    | 16   | 632  | 6    | 631 |
|                                                                                                                  | 596 | 1088 | 998  | 1887 | 4940 | 726  | 801 | 257 | 287  | 1478 | 144  | 723  | 604 |
|                                                                                                                  | 905 | 156  | 672  | 11   | 419  | 463  | 40  | 13  | 6269 | 139  | 1813 | 1290 | 145 |
|                                                                                                                  | 48  | 170  | 4302 | 554  | 695  | 913  | 169 | 946 | 141  | 465  | 272  | 293  | 10  |
|                                                                                                                  | 334 | 4144 | 783  | 1140 | 65   | 40   | 24  | 255 | 1285 | 373  | 90   | 174  | 12  |
|                                                                                                                  | 2   | 715  | 957  | 27   | 157  | 65   | 0   |     |      |      |      |      |     |
| "Viruses;Uroviricota;Caudoviricetes;Crassvirales;Crassvirales__na;Crassvirales__na;CrAss-like_virus_sp."         | 0   | 1    | 3    | 4    | 120  | 21   | 0   | 0   | 0    | 0    | 0    | 0    | 284 |
|                                                                                                                  | 262 | 1139 | 994  | 448  | 1520 | 58   | 36  | 40  | 45   | 9    | 2    | 13   | 23  |
|                                                                                                                  | 51  | 5    | 22   | 0    | 73   | 38   | 0   | 0   | 3    | 3    | 439  | 170  | 54  |
|                                                                                                                  | 68  | 214  | 1995 | 63   | 42   | 1652 | 268 | 31  | 14   | 116  | 49   | 35   | 1   |
|                                                                                                                  | 196 | 16   | 417  | 694  | 5    | 3    | 0   | 94  | 274  | 63   | 16   | 39   | 2   |
|                                                                                                                  | 5   | 60   | 63   | 1    | 5    | 9    | 0   |     |      |      |      |      |     |
| "Viruses;Uroviricota;Caudoviricetes;Crassvirales;Crassvirales__na;Crassvirales__na;CrAss-like_virus_sp_ctOWe7"   | 0   | 0    | 0    | 0    | 0    | 0    | 0   | 0   | 0    | 0    | 0    | 0    | 0   |
|                                                                                                                  | 0   | 0    | 0    | 0    | 0    | 0    | 0   | 3   | 6    | 2    | 3    | 0    | 0   |
|                                                                                                                  | 0   | 0    | 0    | 0    | 0    | 0    | 0   | 0   | 0    | 0    | 0    | 0    | 0   |
|                                                                                                                  | 0   | 0    | 0    | 0    | 0    | 0    | 0   | 0   | 0    | 0    | 0    | 0    | 0   |
|                                                                                                                  | 0   | 0    | 0    | 0    | 0    | 0    | 0   | 0   | 0    | 0    | 0    | 0    | 0   |
|                                                                                                                  | 0   | 0    | 0    | 0    | 0    | 0    | 0   | 0   | 0    |      |      |      |     |
| "Viruses;Uroviricota;Caudoviricetes;Crassvirales;Crassvirales__na;Crassvirales__na;CrAss-like_virus_sp_ctRQZ5"   | 0   | 0    | 0    | 0    | 0    | 0    | 0   | 0   | 0    | 0    | 0    | 0    | 0   |
|                                                                                                                  | 0   | 0    | 0    | 0    | 0    | 0    | 0   | 0   | 0    | 0    | 0    | 0    | 0   |
|                                                                                                                  | 0   | 0    | 0    | 0    | 0    | 0    | 0   | 0   | 0    | 0    | 0    | 0    | 0   |
|                                                                                                                  | 1   | 1    | 0    | 0    | 0    | 0    | 0   | 0   | 0    | 0    | 0    | 0    | 0   |
|                                                                                                                  | 0   | 0    | 0    | 0    | 0    | 0    | 0   | 0   | 0    | 0    | 0    | 0    | 0   |
|                                                                                                                  | 0   | 0    | 0    | 0    | 0    | 0    | 0   | 0   | 0    |      |      |      |     |
| "Viruses;Uroviricota;Caudoviricetes;Crassvirales;Crassvirales__na;Crassvirales__na;CrAss-like_virus_sp_ctt4r3"   | 0   | 0    | 0    | 0    | 0    | 0    | 0   | 0   | 0    | 0    | 0    | 0    | 0   |
|                                                                                                                  | 0   | 1    | 3    | 15   | 6    | 6    | 22  | 0   | 0    | 0    | 0    | 0    | 0   |
|                                                                                                                  | 0   | 0    | 0    | 0    | 0    | 0    | 1   | 1   | 0    | 0    | 0    | 0    | 0   |
|                                                                                                                  | 0   | 0    | 0    | 0    | 0    | 0    | 3   | 0   | 0    | 0    | 0    | 24   | 6   |
|                                                                                                                  | 10  | 0    | 1    | 0    | 1    | 2    | 0   | 0   | 2    | 0    | 0    | 0    | 0   |
|                                                                                                                  | 0   | 0    | 0    | 7    | 5    | 0    | 0   | 0   | 0    |      |      |      |     |
| "Viruses;Uroviricota;Caudoviricetes;Crassvirales;Crassvirales__na;Crassvirales__na;CrAss-like_virus_sp_ctYsL76"  | 0   | 0    | 0    | 0    | 0    | 0    | 0   | 0   | 0    | 0    | 0    | 0    | 0   |
|                                                                                                                  | 0   | 0    | 0    | 0    | 0    | 0    | 0   | 0   | 0    | 0    | 0    | 0    | 0   |
|                                                                                                                  | 0   | 0    | 0    | 0    | 0    | 0    | 0   | 0   | 0    | 0    | 0    | 0    | 0   |
|                                                                                                                  | 0   | 0    | 0    | 0    | 0    | 0    | 0   | 1   | 0    | 0    | 0    | 0    | 0   |
|                                                                                                                  | 0   | 0    | 0    | 0    | 0    | 0    | 0   | 0   | 0    | 0    | 0    | 0    | 0   |
|                                                                                                                  | 0   | 0    | 0    | 0    | 0    | 0    | 0   | 0   | 0    |      |      |      |     |
| "Viruses;Uroviricota;Caudoviricetes;Crassvirales;Crassvirales__na;Crassvirales__na;Crassvirales_sp_ctvpJ74"      | 0   | 0    | 1    | 1    | 0    | 0    | 0   | 0   | 0    | 0    | 0    | 0    | 0   |
|                                                                                                                  | 0   | 0    | 0    | 0    | 0    | 9    | 28  | 16  | 16   | 23   | 3    | 0    | 2   |
|                                                                                                                  | 73  | 12   | 34   | 0    | 0    | 0    | 0   | 0   | 1    | 0    | 0    | 1    | 0   |
|                                                                                                                  | 0   | 0    |      |      |      |      |     |     |      |      |      |      |     |

[illegible]

[illegible]

|                                                                                                              |    |    |   |   |    |    |    |   |   |   |   |    |   |
|--------------------------------------------------------------------------------------------------------------|----|----|---|---|----|----|----|---|---|---|---|----|---|
| 0                                                                                                            | 0  | 0  | 0 | 0 | 0  | 0  | 0  | 0 | 0 | 0 | 0 | 0  |   |
| 0                                                                                                            | 0  | 0  | 0 | 0 | 0  |    |    |   |   |   |   |    |   |
| "Viruses;Uroviricota;Caudoviricetes;Crassvirales;Intestiviridae;Intestiviridae__na;CrAssphage_LMMB"          |    |    |   |   |    |    |    |   |   |   |   | 0  |   |
| 0                                                                                                            | 0  | 0  | 0 | 0 | 0  | 0  | 0  | 0 | 0 | 0 | 0 | 0  |   |
| 0                                                                                                            | 0  | 0  | 0 | 1 | 12 | 3  | 5  | 0 | 0 | 0 | 4 | 24 |   |
| 4                                                                                                            | 18 | 0  | 0 | 0 | 0  | 0  | 0  | 0 | 0 | 0 | 0 | 0  |   |
| 0                                                                                                            | 0  | 0  | 0 | 0 | 0  | 0  | 0  | 0 | 0 | 0 | 0 | 0  |   |
| 5                                                                                                            | 0  | 0  | 0 | 0 | 0  | 0  | 0  | 0 | 0 | 0 | 0 | 0  |   |
| 16                                                                                                           | 19 | 0  | 0 | 0 | 0  |    |    |   |   |   |   |    |   |
| "Viruses;Uroviricota;Caudoviricetes;Crassvirales;Intestiviridae;Intestiviridae__na;CrAssphage_sp._C0526BW15" |    |    |   |   |    |    |    |   |   |   |   |    |   |
| 0                                                                                                            | 0  | 0  | 0 | 0 | 0  | 0  | 0  | 0 | 0 | 0 | 0 | 0  |   |
| 0                                                                                                            | 0  | 0  | 0 | 0 | 1  | 3  | 5  | 6 | 0 | 0 | 0 | 1  |   |
| 15                                                                                                           | 0  | 0  | 0 | 0 | 0  | 0  | 0  | 0 | 0 | 0 | 0 | 0  |   |
| 0                                                                                                            | 0  | 0  | 0 | 0 | 0  | 0  | 0  | 0 | 0 | 0 | 0 | 0  |   |
| 0                                                                                                            | 4  | 1  | 0 | 0 | 0  | 0  | 0  | 0 | 0 | 0 | 0 | 0  |   |
| 0                                                                                                            | 24 | 22 | 0 | 0 | 0  | 0  |    |   |   |   |   |    |   |
| "Viruses;Uroviricota;Caudoviricetes;Crassvirales;Intestiviridae;Intestiviridae__na;CrAssphage_sp._C0531BW4"  |    |    |   |   |    |    |    |   |   |   |   |    |   |
| 0                                                                                                            | 0  | 0  | 0 | 0 | 0  | 0  | 0  | 0 | 0 | 0 | 0 | 0  |   |
| 0                                                                                                            | 0  | 0  | 0 | 0 | 0  | 0  | 0  | 0 | 0 | 0 | 0 | 0  |   |
| 2                                                                                                            | 0  | 0  | 0 | 0 | 0  | 0  | 0  | 0 | 0 | 0 | 0 | 0  |   |
| 0                                                                                                            | 0  | 0  | 0 | 0 | 0  | 0  | 0  | 0 | 0 | 0 | 0 | 0  |   |
| 0                                                                                                            | 0  | 0  | 0 | 0 | 0  | 0  | 0  | 0 | 0 | 0 | 0 | 0  |   |
| 0                                                                                                            | 0  | 0  | 0 | 0 | 0  | 0  |    |   |   |   |   |    |   |
| "Viruses;Uroviricota;Caudoviricetes;Crassvirales;Intestiviridae;Intestiviridae__na;CrAssphage_ZA"            |    |    |   |   |    |    |    |   |   |   |   | 0  |   |
| 0                                                                                                            | 4  | 0  | 0 | 2 | 0  | 0  | 0  | 0 | 0 | 0 | 0 | 0  |   |
| 0                                                                                                            | 0  | 0  | 0 | 6 | 36 | 47 | 24 | 4 | 3 | 1 | 5 | 61 |   |
| 15                                                                                                           | 29 | 1  | 2 | 0 | 0  | 0  | 5  | 0 | 0 | 0 | 0 | 0  |   |
| 0                                                                                                            | 0  | 0  | 0 | 0 | 0  | 0  | 0  | 0 | 0 | 0 | 0 | 0  |   |
| 277                                                                                                          | 1  | 0  | 0 | 0 | 0  | 0  | 0  | 0 | 0 | 0 | 0 | 0  |   |
| 72                                                                                                           | 95 | 0  | 3 | 0 | 0  |    |    |   |   |   |   |    |   |
| "Viruses;Uroviricota;Caudoviricetes;Crassvirales;Intestiviridae;Intestiviridae__uc;Intestiviridae__uc"       |    |    |   |   |    |    |    |   |   |   |   | 0  |   |
| 0                                                                                                            | 0  | 0  | 0 | 0 | 0  | 0  | 0  | 0 | 0 | 0 | 0 | 0  |   |
| 0                                                                                                            | 0  | 0  | 0 | 3 | 22 | 21 | 8  | 8 | 0 | 0 | 2 | 20 |   |
| 3                                                                                                            | 12 | 0  | 0 | 0 | 0  | 0  | 0  | 0 | 0 | 0 | 0 | 0  |   |
| 0                                                                                                            | 0  | 0  | 0 | 0 | 0  | 0  | 0  | 0 | 0 | 0 | 0 | 0  |   |
| 6                                                                                                            | 0  | 0  | 0 | 0 | 0  | 0  | 0  | 0 | 0 | 0 | 0 | 0  |   |
| 26                                                                                                           | 41 | 0  | 1 | 0 | 0  |    |    |   |   |   |   |    |   |
| "Viruses;Uroviricota;Caudoviricetes;Crassvirales;Intestiviridae;Jahgtovirus;Jahgtovirus__uc"                 |    |    |   |   |    |    |    |   |   |   |   | 0  | 0 |
| 0                                                                                                            | 0  | 0  | 0 | 0 | 0  | 0  | 0  | 0 | 0 | 0 | 0 | 0  |   |
| 0                                                                                                            | 0  | 0  | 0 | 0 | 1  | 0  | 0  | 0 | 0 | 0 | 0 | 0  |   |
| 0                                                                                                            | 0  | 0  | 0 | 0 | 0  | 0  | 0  | 0 | 0 | 0 | 0 | 0  |   |
| 0                                                                                                            | 0  | 0  | 0 | 0 | 0  | 0  | 0  | 0 | 0 | 0 | 2 | 0  |   |
| 0                                                                                                            | 0  | 0  | 0 | 0 | 0  | 0  | 0  | 0 | 0 | 0 | 0 | 0  |   |
| 0                                                                                                            | 0  | 0  | 0 | 0 |    |    |    |   |   |   |   |    |   |
| "Viruses;Uroviricota;Caudoviricetes;Crassvirales;Intestiviridae;Jahgtovirus;Jahgtovirus_gastrointestinalis"  |    |    |   |   |    |    |    |   |   |   |   |    |   |
| 0                                                                                                            | 0  | 1  | 0 | 0 | 0  | 0  | 0  | 0 | 0 | 0 | 0 | 0  |   |
| 0                                                                                                            | 0  | 0  | 0 | 0 | 1  | 2  | 1  | 2 | 2 | 0 | 0 | 0  |   |
| 0                                                                                                            | 0  | 0  | 0 | 0 | 0  | 0  | 0  | 0 | 0 | 0 | 3 | 3  |   |
| 1                                                                                                            | 0  | 0  | 0 | 0 | 0  | 0  | 0  | 0 | 0 | 0 | 0 | 0  |   |

|                                                                                                           |   |   |    |   |   |   |   |   |   |   |   |   |
|-----------------------------------------------------------------------------------------------------------|---|---|----|---|---|---|---|---|---|---|---|---|
| 2                                                                                                         | 0 | 0 | 0  | 0 | 0 | 0 | 0 | 0 | 0 | 0 | 0 | 0 |
| 0                                                                                                         | 0 | 0 | 0  | 0 | 0 | 0 |   |   |   |   |   |   |
| "Viruses;Uroviricota;Caudoviricetes;Crassvirales;Intestiviridae;Jahgtovirus;Jahgtovirus_intestinihominis" |   |   |    |   |   |   |   |   |   |   |   | 0 |
| 0                                                                                                         | 0 | 0 | 0  | 0 | 0 | 0 | 0 | 0 | 0 | 0 | 0 | 0 |
| 0                                                                                                         | 0 | 0 | 0  | 1 | 1 | 3 | 0 | 0 | 0 | 0 | 0 | 0 |
| 0                                                                                                         | 0 | 0 | 0  | 0 | 0 | 0 | 0 | 0 | 0 | 0 | 0 | 0 |
| 1                                                                                                         | 0 | 0 | 0  | 0 | 0 | 0 | 0 | 0 | 0 | 0 | 0 | 0 |
| 0                                                                                                         | 0 | 0 | 0  | 0 | 0 | 0 | 0 | 0 | 0 | 0 | 0 | 1 |
| 0                                                                                                         | 0 | 0 | 0  | 0 | 0 |   |   |   |   |   |   |   |
| "Viruses;Uroviricota;Caudoviricetes;Crassvirales;Intestiviridae;Jahgtovirus;Jahgtovirus_secundus"         |   |   |    |   |   |   |   |   |   |   |   | 0 |
| 0                                                                                                         | 0 | 0 | 0  | 0 | 0 | 0 | 0 | 0 | 0 | 0 | 0 | 0 |
| 0                                                                                                         | 0 | 0 | 0  | 0 | 2 | 2 | 0 | 1 | 0 | 0 | 0 | 0 |
| 0                                                                                                         | 0 | 0 | 0  | 0 | 0 | 0 | 0 | 0 | 0 | 0 | 0 | 0 |
| 0                                                                                                         | 0 | 0 | 0  | 0 | 0 | 0 | 0 | 0 | 0 | 0 | 0 | 0 |
| 0                                                                                                         | 0 | 0 | 0  | 0 | 0 | 0 | 0 | 0 | 0 | 0 | 0 | 0 |
| 0                                                                                                         | 0 | 0 | 0  | 0 | 0 |   |   |   |   |   |   |   |
| "Viruses;Uroviricota;Caudoviricetes;Crassvirales;Intestiviridae;Whopevirus;Whopevirus_animalis"           |   |   |    |   |   |   |   |   |   |   |   | 0 |
| 0                                                                                                         | 0 | 0 | 0  | 0 | 0 | 0 | 0 | 0 | 0 | 0 | 0 | 0 |
| 6                                                                                                         | 1 | 0 | 0  | 0 | 0 | 0 | 0 | 0 | 0 | 0 | 0 | 0 |
| 0                                                                                                         | 0 | 0 | 0  | 0 | 0 | 0 | 0 | 0 | 0 | 0 | 0 | 0 |
| 0                                                                                                         | 0 | 0 | 0  | 0 | 0 | 0 | 0 | 0 | 0 | 0 | 0 | 0 |
| 0                                                                                                         | 0 | 0 | 0  | 0 | 0 | 0 | 0 | 0 | 0 | 0 | 0 | 0 |
| 0                                                                                                         | 0 | 0 | 0  | 0 | 0 |   |   |   |   |   |   |   |
| "Viruses;Uroviricota;Caudoviricetes;Crassvirales;Intestiviridae;Wotdevirus;Wotdevirus_murinus"            |   |   |    |   |   |   |   |   |   |   |   | 0 |
| 0                                                                                                         | 0 | 0 | 0  | 0 | 0 | 0 | 0 | 0 | 0 | 0 | 0 | 0 |
| 0                                                                                                         | 0 | 0 | 0  | 0 | 0 | 0 | 0 | 0 | 0 | 0 | 0 | 0 |
| 0                                                                                                         | 0 | 0 | 0  | 0 | 0 | 0 | 0 | 0 | 0 | 0 | 0 | 0 |
| 0                                                                                                         | 0 | 0 | 0  | 0 | 0 | 0 | 0 | 0 | 0 | 0 | 0 | 0 |
| 0                                                                                                         | 0 | 0 | 0  | 0 | 0 | 0 | 0 | 0 | 0 | 0 | 0 | 0 |
| 0                                                                                                         | 1 | 0 | 0  | 0 | 0 |   |   |   |   |   |   |   |
| "Viruses;Uroviricota;Caudoviricetes;Crassvirales;Steigviridae;Akihdevirus;Akihdevirus_balticus"           |   |   |    |   |   |   |   |   |   |   |   | 0 |
| 0                                                                                                         | 0 | 4 | 0  | 0 | 0 | 0 | 0 | 0 | 0 | 0 | 0 | 0 |
| 0                                                                                                         | 0 | 0 | 0  | 0 | 0 | 0 | 0 | 0 | 0 | 0 | 0 | 0 |
| 0                                                                                                         | 0 | 0 | 0  | 0 | 0 | 0 | 0 | 0 | 0 | 0 | 0 | 0 |
| 0                                                                                                         | 0 | 0 | 0  | 0 | 0 | 0 | 0 | 0 | 0 | 0 | 0 | 0 |
| 0                                                                                                         | 0 | 0 | 0  | 0 | 0 | 0 | 0 | 0 | 0 | 0 | 0 | 0 |
| 0                                                                                                         | 0 | 0 | 0  | 0 |   |   |   |   |   |   |   |   |
| "Viruses;Uroviricota;Caudoviricetes;Crassvirales;Steigviridae;Kahnovirus;Kahnovirus__uc"                  |   |   |    |   |   |   |   |   |   |   |   | 0 |
| 0                                                                                                         | 0 | 0 | 0  | 0 | 0 | 0 | 0 | 0 | 0 | 0 | 0 | 0 |
| 0                                                                                                         | 0 | 0 | 0  | 0 | 0 | 0 | 0 | 0 | 0 | 0 | 0 | 0 |
| 0                                                                                                         | 0 | 0 | 0  | 0 | 0 | 0 | 0 | 0 | 1 | 0 | 0 | 0 |
| 0                                                                                                         | 0 | 0 | 0  | 0 | 0 | 0 | 0 | 0 | 0 | 0 | 1 | 0 |
| 0                                                                                                         | 0 | 0 | 0  | 0 | 0 | 0 | 0 | 0 | 0 | 0 | 0 | 0 |
| 0                                                                                                         | 0 | 0 | 0  | 0 |   |   |   |   |   |   |   |   |
| "Viruses;Uroviricota;Caudoviricetes;Crassvirales;Steigviridae;Kahnovirus;Kahnovirus_copri"                |   |   |    |   |   |   |   |   |   |   |   | 0 |
| 0                                                                                                         | 0 | 0 | 0  | 0 | 0 | 0 | 0 | 0 | 0 | 0 | 0 | 0 |
| 0                                                                                                         | 0 | 0 | 0  | 0 | 0 | 0 | 0 | 0 | 0 | 0 | 0 | 0 |
| 0                                                                                                         | 0 | 0 | 0  | 0 | 0 | 0 | 0 | 1 | 1 | 0 | 0 | 1 |
| 0                                                                                                         | 0 | 0 | 11 | 2 | 0 | 0 | 0 | 0 | 0 | 0 | 0 | 0 |



[illegible]





[illegible]

|                                                                                                  |   |   |   |   |   |    |    |    |   |    |   |    |
|--------------------------------------------------------------------------------------------------|---|---|---|---|---|----|----|----|---|----|---|----|
| 0                                                                                                | 0 | 0 | 0 | 0 | 0 | 0  | 0  | 0  | 0 | 0  | 0 | 0  |
| 0                                                                                                | 0 | 0 | 0 | 0 | 0 |    |    |    |   |    |   |    |
| "Viruses;Uroviricota;Caudoviricetes;Crassvirales;Suoliviridae;Buorbuivirus;Buorbuivirus_hominis" |   |   |   |   |   |    |    |    |   |    |   | 0  |
| 0                                                                                                | 0 | 0 | 0 | 0 | 0 | 0  | 0  | 0  | 0 | 0  | 0 | 0  |
| 0                                                                                                | 0 | 0 | 0 | 0 | 0 | 0  | 0  | 0  | 0 | 0  | 0 | 0  |
| 0                                                                                                | 0 | 0 | 0 | 0 | 0 | 0  | 0  | 0  | 0 | 1  | 0 | 0  |
| 0                                                                                                | 0 | 0 | 0 | 0 | 0 | 0  | 0  | 0  | 0 | 0  | 0 | 0  |
| 0                                                                                                | 0 | 0 | 0 | 0 | 0 | 0  | 0  | 0  | 0 | 0  | 0 | 0  |
| 0                                                                                                | 0 | 0 | 0 | 0 | 0 |    |    |    |   |    |   |    |
| "Viruses;Uroviricota;Caudoviricetes;Crassvirales;Suoliviridae;Burzaovirus;Burzaovirus__uc"       |   |   |   |   |   |    |    |    |   |    |   | 0  |
| 0                                                                                                | 0 | 0 | 0 | 0 | 0 | 0  | 0  | 0  | 0 | 0  | 0 | 0  |
| 0                                                                                                | 0 | 0 | 0 | 0 | 0 | 0  | 0  | 0  | 0 | 0  | 0 | 0  |
| 0                                                                                                | 0 | 0 | 0 | 0 | 0 | 0  | 0  | 0  | 0 | 0  | 0 | 0  |
| 0                                                                                                | 0 | 1 | 8 | 0 | 0 | 0  | 0  | 0  | 0 | 0  | 0 | 0  |
| 0                                                                                                | 0 | 0 | 0 | 0 | 0 | 0  | 0  | 0  | 0 | 0  | 0 | 0  |
| 0                                                                                                | 0 | 0 | 0 | 0 |   |    |    |    |   |    |   |    |
| "Viruses;Uroviricota;Caudoviricetes;Crassvirales;Suoliviridae;Cacepaovirus;Cacepaovirus_simiae"  |   |   |   |   |   |    |    |    |   |    |   | 0  |
| 0                                                                                                | 0 | 0 | 0 | 0 | 0 | 0  | 0  | 0  | 0 | 0  | 0 | 0  |
| 0                                                                                                | 0 | 0 | 0 | 0 | 0 | 0  | 0  | 0  | 0 | 0  | 0 | 0  |
| 0                                                                                                | 0 | 0 | 0 | 0 | 0 | 0  | 0  | 0  | 0 | 0  | 0 | 0  |
| 0                                                                                                | 0 | 0 | 0 | 0 | 0 | 0  | 0  | 0  | 0 | 0  | 0 | 0  |
| 0                                                                                                | 0 | 1 | 0 | 0 | 0 | 0  | 0  | 0  | 0 | 0  | 0 | 0  |
| 0                                                                                                | 0 | 0 | 0 | 0 | 0 |    |    |    |   |    |   |    |
| "Viruses;Uroviricota;Caudoviricetes;Crassvirales;Suoliviridae;Canhaevirus;Canhaevirus_faecalis"  |   |   |   |   |   |    |    |    |   |    |   | 0  |
| 0                                                                                                | 0 | 0 | 0 | 0 | 0 | 0  | 0  | 0  | 0 | 0  | 0 | 8  |
| 4                                                                                                | 0 | 1 | 0 | 0 | 0 | 0  | 0  | 0  | 0 | 0  | 0 | 0  |
| 0                                                                                                | 0 | 0 | 0 | 0 | 0 | 16 | 0  | 0  | 0 | 0  | 0 | 0  |
| 0                                                                                                | 0 | 0 | 0 | 0 | 0 | 0  | 0  | 0  | 0 | 0  | 0 | 9  |
| 0                                                                                                | 0 | 0 | 0 | 0 | 0 | 0  | 0  | 0  | 0 | 0  | 0 | 13 |
| 8                                                                                                | 1 | 0 | 0 | 0 |   |    |    |    |   |    |   |    |
| "Viruses;Uroviricota;Caudoviricetes;Crassvirales;Suoliviridae;Canhaevirus;Canhaevirus_hiberniae" |   |   |   |   |   |    |    |    |   |    |   | 0  |
| 0                                                                                                | 0 | 0 | 0 | 0 | 0 | 0  | 0  | 0  | 0 | 0  | 0 | 0  |
| 0                                                                                                | 0 | 0 | 0 | 0 | 0 | 0  | 0  | 0  | 0 | 0  | 0 | 0  |
| 0                                                                                                | 0 | 0 | 0 | 0 | 0 | 0  | 0  | 0  | 0 | 0  | 0 | 0  |
| 0                                                                                                | 0 | 0 | 0 | 0 | 0 | 0  | 0  | 13 | 3 | 10 | 0 | 0  |
| 0                                                                                                | 1 | 0 | 0 | 0 | 0 | 0  | 0  | 0  | 0 | 0  | 0 | 0  |
| 0                                                                                                | 0 | 0 | 0 | 0 | 0 |    |    |    |   |    |   |    |
| "Viruses;Uroviricota;Caudoviricetes;Crassvirales;Suoliviridae;Cohcovirus;Cohcovirus__uc"         |   |   |   |   |   |    |    |    |   |    |   | 0  |
| 0                                                                                                | 0 | 0 | 0 | 0 | 0 | 0  | 0  | 0  | 0 | 0  | 0 | 0  |
| 0                                                                                                | 0 | 0 | 0 | 0 | 0 | 0  | 0  | 0  | 0 | 0  | 0 | 0  |
| 0                                                                                                | 0 | 0 | 0 | 0 | 0 | 0  | 0  | 0  | 0 | 0  | 0 | 0  |
| 0                                                                                                | 0 | 0 | 0 | 0 | 0 | 0  | 4  | 0  | 0 | 0  | 0 | 0  |
| 0                                                                                                | 0 | 0 | 0 | 0 | 0 | 0  | 0  | 0  | 0 | 0  | 0 | 0  |
| 0                                                                                                | 0 | 0 | 0 | 0 |   |    |    |    |   |    |   |    |
| "Viruses;Uroviricota;Caudoviricetes;Crassvirales;Suoliviridae;Cohcovirus;Cohcovirus_hiberniae"   |   |   |   |   |   |    |    |    |   |    |   | 0  |
| 0                                                                                                | 0 | 0 | 0 | 0 | 0 | 0  | 0  | 0  | 0 | 0  | 0 | 0  |
| 0                                                                                                | 0 | 0 | 0 | 0 | 0 | 0  | 0  | 0  | 0 | 0  | 0 | 0  |
| 0                                                                                                | 0 | 0 | 0 | 0 | 0 | 0  | 0  | 0  | 0 | 0  | 0 | 0  |
| 0                                                                                                | 0 | 0 | 0 | 0 | 0 | 0  | 14 | 7  | 2 | 0  | 0 | 0  |

[illegible]

[illegible]

|                                                                                                         |    |   |   |    |    |     |    |    |   |   |   |    |
|---------------------------------------------------------------------------------------------------------|----|---|---|----|----|-----|----|----|---|---|---|----|
| 0                                                                                                       | 0  | 0 | 0 | 0  | 0  | 0   | 0  | 0  | 0 | 0 | 0 | 0  |
| 0                                                                                                       | 0  | 0 | 0 | 0  | 0  |     |    |    |   |   |   |    |
| "Viruses;Viruses__na;Viruses__na;Viruses__na;Anelloviridae;Alphatorquevirus;Torque_teno_virus_24"       |    |   |   |    |    |     |    |    |   |   |   | 3  |
| 1                                                                                                       | 0  | 0 | 0 | 0  | 0  | 0   | 0  | 0  | 0 | 0 | 0 | 0  |
| 0                                                                                                       | 0  | 0 | 0 | 0  | 0  | 0   | 0  | 0  | 0 | 0 | 0 | 0  |
| 0                                                                                                       | 0  | 0 | 0 | 0  | 0  | 0   | 0  | 0  | 0 | 0 | 0 | 0  |
| 0                                                                                                       | 0  | 0 | 0 | 0  | 0  | 7   | 0  | 0  | 0 | 0 | 0 | 0  |
| 0                                                                                                       | 0  | 0 | 0 | 0  | 0  | 0   | 0  | 0  | 0 | 0 | 1 | 0  |
| 0                                                                                                       | 0  | 0 | 0 | 0  | 0  |     |    |    |   |   |   |    |
| "Viruses;Viruses__na;Viruses__na;Viruses__na;Anelloviridae;Alphatorquevirus;Torque_teno_virus_3"        |    |   |   |    |    |     |    |    |   |   |   | 0  |
| 0                                                                                                       | 0  | 0 | 0 | 0  | 0  | 0   | 0  | 0  | 0 | 0 | 0 | 0  |
| 0                                                                                                       | 0  | 0 | 0 | 0  | 0  | 0   | 0  | 0  | 0 | 0 | 0 | 0  |
| 0                                                                                                       | 0  | 0 | 0 | 0  | 0  | 0   | 0  | 0  | 0 | 1 | 0 | 0  |
| 0                                                                                                       | 0  | 0 | 0 | 0  | 0  | 0   | 0  | 0  | 0 | 0 | 0 | 0  |
| 0                                                                                                       | 0  | 0 | 0 | 0  | 0  | 0   | 0  | 0  | 0 | 0 | 0 | 0  |
| 0                                                                                                       | 0  | 0 | 0 | 0  | 0  |     |    |    |   |   |   |    |
| "Viruses;Viruses__na;Viruses__na;Viruses__na;Anelloviridae;Anelloviridae__na;Anelloviridae_sp."         |    |   |   |    |    |     |    |    |   |   |   | 14 |
| 6                                                                                                       | 0  | 0 | 0 | 0  | 0  | 0   | 4  | 0  | 2 | 0 | 0 | 0  |
| 0                                                                                                       | 0  | 0 | 0 | 0  | 0  | 0   | 0  | 0  | 0 | 0 | 1 | 0  |
| 0                                                                                                       | 0  | 0 | 0 | 0  | 0  | 0   | 0  | 1  | 0 | 1 | 0 | 0  |
| 0                                                                                                       | 0  | 0 | 0 | 6  | 5  | 325 | 0  | 0  | 0 | 0 | 0 | 0  |
| 0                                                                                                       | 0  | 0 | 0 | 0  | 0  | 0   | 0  | 0  | 0 | 0 | 0 | 0  |
| 0                                                                                                       | 0  | 1 | 0 | 0  | 0  |     |    |    |   |   |   |    |
| "Viruses;Viruses__na;Viruses__na;Viruses__na;Anelloviridae;Anelloviridae__na;Human_anellovirus_zj-ad_1" |    |   |   |    |    |     |    |    |   |   |   |    |
| 0                                                                                                       | 0  | 0 | 0 | 0  | 0  | 0   | 0  | 0  | 0 | 0 | 0 | 0  |
| 0                                                                                                       | 0  | 0 | 0 | 0  | 0  | 0   | 0  | 0  | 0 | 0 | 0 | 0  |
| 0                                                                                                       | 0  | 0 | 0 | 0  | 0  | 0   | 0  | 0  | 0 | 0 | 0 | 0  |
| 0                                                                                                       | 0  | 0 | 0 | 0  | 0  | 0   | 39 | 0  | 0 | 0 | 0 | 0  |
| 0                                                                                                       | 0  | 0 | 0 | 0  | 0  | 0   | 0  | 0  | 0 | 0 | 0 | 0  |
| 0                                                                                                       | 0  | 0 | 0 | 0  | 0  | 0   |    |    |   |   |   |    |
| "Viruses;Viruses__na;Viruses__na;Viruses__na;Anelloviridae;Anelloviridae__na;Torque_teno_midi_virus"    |    |   |   |    |    |     |    |    |   |   |   |    |
| 0                                                                                                       | 0  | 0 | 0 | 0  | 0  | 0   | 0  | 1  | 0 | 1 | 0 | 0  |
| 0                                                                                                       | 0  | 0 | 0 | 0  | 0  | 0   | 0  | 0  | 0 | 0 | 0 | 0  |
| 0                                                                                                       | 0  | 0 | 0 | 0  | 0  | 0   | 0  | 0  | 0 | 0 | 0 | 0  |
| 0                                                                                                       | 0  | 0 | 0 | 0  | 0  | 0   | 2  | 0  | 0 | 0 | 0 | 0  |
| 0                                                                                                       | 0  | 0 | 0 | 0  | 0  | 0   | 0  | 0  | 0 | 0 | 0 | 0  |
| 0                                                                                                       | 0  | 0 | 0 | 0  | 0  | 0   |    |    |   |   |   |    |
| "Viruses;Viruses__na;Viruses__na;Viruses__na;Anelloviridae;Anelloviridae__na;Torque_teno_virus"         |    |   |   |    |    |     |    |    |   |   |   | 19 |
| 11                                                                                                      | 0  | 0 | 0 | 0  | 0  | 0   | 3  | 1  | 0 | 0 | 1 | 0  |
| 0                                                                                                       | 0  | 0 | 0 | 0  | 0  | 0   | 0  | 1  | 0 | 0 | 0 | 0  |
| 0                                                                                                       | 0  | 0 | 0 | 0  | 0  | 0   | 0  | 3  | 0 | 1 | 0 | 0  |
| 0                                                                                                       | 15 | 0 | 0 | 6  | 6  | 428 | 0  | 0  | 0 | 0 | 0 | 0  |
| 0                                                                                                       | 0  | 0 | 0 | 0  | 0  | 0   | 0  | 0  | 0 | 1 | 0 | 0  |
| 0                                                                                                       | 0  | 1 | 0 | 0  | 0  |     |    |    |   |   |   |    |
| "Viruses;Viruses__na;Viruses__na;Viruses__na;Anelloviridae;Anelloviridae__uc;Anelloviridae__uc"         |    |   |   |    |    |     |    |    |   |   |   | 30 |
| 30                                                                                                      | 0  | 0 | 0 | 0  | 0  | 0   | 4  | 2  | 0 | 0 | 0 | 1  |
| 0                                                                                                       | 0  | 0 | 0 | 0  | 0  | 0   | 0  | 0  | 0 | 0 | 0 | 0  |
| 0                                                                                                       | 1  | 1 | 0 | 0  | 1  | 0   | 4  | 10 | 0 | 3 | 0 | 0  |
| 0                                                                                                       | 2  | 0 | 0 | 12 | 19 | 608 | 0  | 0  | 0 | 0 | 0 | 1  |





|                                                                                                                         |    |     |     |   |   |   |   |   |   |   |   |    |
|-------------------------------------------------------------------------------------------------------------------------|----|-----|-----|---|---|---|---|---|---|---|---|----|
| 0                                                                                                                       | 0  | 0   | 0   | 0 | 0 | 0 | 0 | 0 | 0 | 0 | 0 | 0  |
| 0                                                                                                                       | 0  | 0   | 0   | 0 |   |   |   |   |   |   |   |    |
| "Viruses;Viruses__na;Viruses__na;Viruses__na;Cruciviridae;Cruciviridae__na;Crucivirus-427"                              |    |     |     |   |   |   |   |   |   |   | 0 | 0  |
| 1                                                                                                                       | 1  | 0   | 3   | 0 | 0 | 0 | 0 | 0 | 0 | 0 | 0 | 0  |
| 0                                                                                                                       | 0  | 0   | 0   | 0 | 0 | 0 | 0 | 0 | 0 | 0 | 0 | 0  |
| 0                                                                                                                       | 0  | 0   | 0   | 0 | 0 | 0 | 0 | 0 | 0 | 0 | 0 | 0  |
| 0                                                                                                                       | 0  | 0   | 0   | 0 | 0 | 0 | 0 | 0 | 0 | 0 | 0 | 0  |
| 0                                                                                                                       | 0  | 0   | 0   | 0 | 0 | 0 | 0 | 0 | 0 | 0 | 0 | 0  |
| 0                                                                                                                       | 0  | 0   | 0   | 0 |   |   |   |   |   |   |   |    |
| "Viruses;Viruses__na;Viruses__na;Viruses__na;Cruciviridae;Cruciviridae__na;Crucivirus-432"                              |    |     |     |   |   |   |   |   |   |   | 0 | 0  |
| 0                                                                                                                       | 0  | 0   | 0   | 0 | 0 | 0 | 0 | 0 | 0 | 0 | 0 | 0  |
| 0                                                                                                                       | 0  | 0   | 0   | 0 | 0 | 0 | 0 | 1 | 0 | 0 | 0 | 0  |
| 0                                                                                                                       | 0  | 0   | 0   | 0 | 0 | 0 | 0 | 0 | 0 | 0 | 0 | 0  |
| 0                                                                                                                       | 0  | 0   | 0   | 0 | 0 | 0 | 0 | 0 | 0 | 0 | 0 | 0  |
| 0                                                                                                                       | 0  | 0   | 0   | 0 | 0 | 0 | 0 | 0 | 0 | 0 | 0 | 0  |
| 0                                                                                                                       | 0  | 0   | 0   | 0 |   |   |   |   |   |   |   |    |
| "Viruses;Viruses__na;Viruses__na;Viruses__na;Cruciviridae;Cruciviridae__na;Crucivirus-468"                              |    |     |     |   |   |   |   |   |   |   | 0 | 0  |
| 6                                                                                                                       | 30 | 331 | 131 | 0 | 0 | 0 | 0 | 0 | 0 | 0 | 0 | 0  |
| 0                                                                                                                       | 1  | 13  | 0   | 0 | 0 | 0 | 1 | 2 | 0 | 0 | 0 | 0  |
| 0                                                                                                                       | 1  | 0   | 0   | 0 | 0 | 2 | 0 | 0 | 0 | 0 | 0 | 0  |
| 5                                                                                                                       | 0  | 0   | 0   | 0 | 0 | 6 | 0 | 0 | 0 | 0 | 1 | 0  |
| 0                                                                                                                       | 0  | 0   | 0   | 0 | 0 | 0 | 0 | 0 | 0 | 0 | 0 | 0  |
| 0                                                                                                                       | 0  | 0   | 2   | 0 |   |   |   |   |   |   |   |    |
| "Viruses;Viruses__na;Viruses__na;Viruses__na;Cruciviridae;Cruciviridae__na;Crucivirus-479"                              |    |     |     |   |   |   |   |   |   |   | 0 | 0  |
| 3                                                                                                                       | 11 | 101 | 25  | 0 | 0 | 0 | 0 | 0 | 0 | 0 | 0 | 0  |
| 0                                                                                                                       | 0  | 0   | 0   | 0 | 0 | 0 | 0 | 0 | 0 | 0 | 0 | 0  |
| 0                                                                                                                       | 0  | 0   | 0   | 0 | 0 | 0 | 0 | 0 | 0 | 0 | 0 | 0  |
| 0                                                                                                                       | 0  | 0   | 0   | 0 | 0 | 1 | 0 | 0 | 0 | 0 | 0 | 0  |
| 0                                                                                                                       | 0  | 0   | 0   | 0 | 0 | 0 | 0 | 0 | 0 | 0 | 0 | 0  |
| 0                                                                                                                       | 0  | 0   | 0   | 0 |   |   |   |   |   |   |   |    |
| "Viruses;Viruses__na;Viruses__na;Viruses__na;Cruciviridae;Cruciviridae__na;Crucivirus-93"                               |    |     |     |   |   |   |   |   |   |   | 0 | 0  |
| 0                                                                                                                       | 1  | 0   | 0   | 0 | 0 | 0 | 0 | 0 | 0 | 0 | 0 | 0  |
| 0                                                                                                                       | 0  | 0   | 0   | 0 | 0 | 0 | 0 | 0 | 0 | 0 | 0 | 0  |
| 0                                                                                                                       | 0  | 0   | 0   | 0 | 0 | 0 | 0 | 0 | 0 | 0 | 0 | 0  |
| 0                                                                                                                       | 0  | 0   | 0   | 0 | 0 | 0 | 0 | 0 | 0 | 0 | 0 | 0  |
| 0                                                                                                                       | 0  | 0   | 0   | 0 | 0 | 0 | 0 | 0 | 0 | 0 | 0 | 0  |
| 0                                                                                                                       | 0  | 0   | 0   | 0 |   |   |   |   |   |   |   |    |
| "Viruses;Viruses__na;Viruses__na;Viruses__na;Cruciviridae;Cruciviridae__na;Crucivirus-like_circular_genetic_element-85" |    |     |     |   |   |   |   |   |   |   | 0 | 0  |
| 0                                                                                                                       | 0  | 0   | 0   | 0 | 0 | 0 | 0 | 0 | 0 | 0 | 0 | 0  |
| 0                                                                                                                       | 0  | 0   | 0   | 0 | 0 | 0 | 0 | 0 | 0 | 0 | 0 | 1  |
| 0                                                                                                                       | 0  | 0   | 0   | 0 | 0 | 0 | 0 | 0 | 0 | 0 | 0 | 25 |
| 0                                                                                                                       | 0  | 0   | 0   | 0 | 1 | 0 | 0 | 0 | 0 | 0 | 0 | 0  |
| 0                                                                                                                       | 0  | 0   | 0   | 0 | 0 | 0 | 0 | 0 | 0 | 0 |   |    |
| "Viruses;Viruses__na;Viruses__na;Viruses__na;Cruciviridae;Cruciviridae__uc;Cruciviridae__uc"                            |    |     |     |   |   |   |   |   |   |   | 0 | 0  |
| 2                                                                                                                       | 2  | 10  | 0   | 0 | 0 | 0 | 0 | 0 | 0 | 0 | 0 | 0  |
| 0                                                                                                                       | 0  | 0   | 0   | 0 | 0 | 0 | 0 | 0 | 0 | 0 | 0 | 0  |
| 0                                                                                                                       | 0  | 0   | 0   | 0 | 0 | 0 | 0 | 0 | 0 | 0 | 0 | 0  |
| 0                                                                                                                       | 0  | 0   | 0   | 0 | 0 | 4 | 0 | 0 | 0 | 0 | 0 | 0  |

|                                                                                                 |      |       |       |      |      |       |      |      |      |      |      |       |
|-------------------------------------------------------------------------------------------------|------|-------|-------|------|------|-------|------|------|------|------|------|-------|
| 0                                                                                               | 0    | 0     | 0     | 0    | 0    | 0     | 0    | 0    | 0    | 0    | 0    | 0     |
| 0                                                                                               | 0    | 0     | 0     | 0    |      |       |      |      |      |      |      |       |
| "Viruses;Viruses__na;Viruses__na;Viruses__na;Pithoviridae;Pithoviridae__na;Pithovirus_LCPAC201" |      |       |       |      |      |       |      |      |      |      |      | 0     |
| 0                                                                                               | 0    | 0     | 0     | 7    | 0    | 0     | 0    | 0    | 0    | 0    | 0    | 0     |
| 0                                                                                               | 0    | 0     | 0     | 0    | 0    | 0     | 0    | 0    | 0    | 0    | 0    | 0     |
| 0                                                                                               | 0    | 0     | 0     | 0    | 0    | 0     | 0    | 0    | 0    | 0    | 0    | 0     |
| 0                                                                                               | 0    | 0     | 0     | 0    | 0    | 0     | 0    | 0    | 0    | 0    | 0    | 0     |
| 0                                                                                               | 0    | 0     | 0     | 0    | 0    | 0     | 0    | 0    | 0    | 0    | 0    | 0     |
| 0                                                                                               | 0    | 0     | 0     | 0    | 0    | 0     | 0    | 0    | 0    | 0    | 0    | 0     |
| "Viruses;Viruses__na;Viruses__na;Viruses__na;Pithoviridae;Pithoviridae__na;Pithovirus_LCPAC304" |      |       |       |      |      |       |      |      |      |      |      | 0     |
| 0                                                                                               | 0    | 0     | 0     | 2    | 0    | 0     | 0    | 0    | 0    | 0    | 0    | 0     |
| 0                                                                                               | 0    | 0     | 0     | 0    | 0    | 0     | 0    | 0    | 0    | 0    | 0    | 0     |
| 0                                                                                               | 0    | 0     | 0     | 0    | 0    | 0     | 0    | 0    | 0    | 0    | 0    | 0     |
| 0                                                                                               | 0    | 0     | 0     | 0    | 0    | 0     | 0    | 0    | 0    | 0    | 0    | 0     |
| 0                                                                                               | 0    | 0     | 0     | 0    | 0    | 0     | 0    | 0    | 0    | 0    | 0    | 0     |
| 0                                                                                               | 0    | 0     | 0     | 0    | 0    |       |      |      |      |      |      |       |
| "Viruses;Viruses__na;Viruses__na;Viruses__na;Viruses__na;Pandoravirus;Pandoravirus__uc"         |      |       |       |      |      |       |      |      |      |      |      | 0     |
| 0                                                                                               | 0    | 0     | 0     | 0    | 0    | 0     | 0    | 0    | 0    | 0    | 0    | 0     |
| 0                                                                                               | 0    | 0     | 0     | 0    | 0    | 0     | 0    | 0    | 0    | 0    | 0    | 0     |
| 0                                                                                               | 0    | 0     | 0     | 0    | 0    | 0     | 0    | 0    | 0    | 0    | 0    | 0     |
| 0                                                                                               | 0    | 0     | 0     | 0    | 0    | 0     | 0    | 0    | 0    | 0    | 0    | 0     |
| 0                                                                                               | 0    | 0     | 0     | 0    | 1    | 0     | 0    | 0    | 0    | 0    | 0    | 0     |
| 0                                                                                               | 0    | 0     | 0     | 0    |      |       |      |      |      |      |      |       |
| "Viruses;Viruses__na;Viruses__na;Viruses__na;Viruses__na;Agaricus_bisporus_virus_7"             |      |       |       |      |      |       |      |      |      |      |      | 0     |
| 0                                                                                               | 0    | 0     | 0     | 0    | 0    | 0     | 0    | 0    | 0    | 0    | 0    | 0     |
| 0                                                                                               | 0    | 0     | 0     | 0    | 0    | 0     | 0    | 0    | 0    | 0    | 0    | 0     |
| 0                                                                                               | 0    | 0     | 0     | 0    | 0    | 0     | 0    | 0    | 0    | 0    | 1    | 0     |
| 0                                                                                               | 0    | 0     | 0     | 0    | 0    | 0     | 0    | 0    | 0    | 0    | 0    | 0     |
| 0                                                                                               | 0    | 0     | 0     | 0    | 0    | 0     | 0    | 0    | 0    | 0    | 0    | 0     |
| 0                                                                                               | 0    | 0     | 0     | 0    | 0    |       |      |      |      |      |      |       |
| "Viruses;Viruses__na;Viruses__na;Viruses__na;Viruses__na;Viruses__na;Bacteriophage_sp."         |      |       |       |      |      |       |      |      |      |      |      | 23    |
| 193                                                                                             | 26   | 937   | 218   | 1    | 0    | 12    | 5    | 63   | 0    | 5429 | 4773 | 10823 |
| 10367                                                                                           | 3945 | 24260 | 3095  | 4593 | 1838 | 1513  | 865  | 424  | 4093 | 5325 | 4420 | 722   |
| 3011                                                                                            | 41   | 1469  | 1425  | 45   | 13   | 7267  | 123  | 3943 | 5162 | 256  | 165  | 366   |
| 16384                                                                                           | 2163 | 2736  | 4595  | 867  | 485  | 150   | 4689 | 2720 | 2803 | 225  | 419  | 35823 |
| 4204                                                                                            | 6363 | 113   | 63    | 772  | 625  | 16030 | 4874 | 166  | 246  | 51   | 11   | 5039  |
| 6829                                                                                            | 79   | 631   | 24354 | 1    |      |       |      |      |      |      |      |       |
| "Viruses;Viruses__na;Viruses__na;Viruses__na;Viruses__na;Viruses__na;Bacteroides_phage_BS162P1" |      |       |       |      |      |       |      |      |      |      |      | 0     |
| 0                                                                                               | 0    | 0     | 0     | 0    | 0    | 0     | 0    | 0    | 0    | 0    | 0    | 1     |
| 0                                                                                               | 0    | 0     | 0     | 0    | 0    | 0     | 0    | 0    | 0    | 0    | 0    | 0     |
| 0                                                                                               | 0    | 0     | 0     | 0    | 0    | 0     | 0    | 0    | 0    | 0    | 0    | 0     |
| 0                                                                                               | 0    | 0     | 0     | 0    | 0    | 0     | 0    | 0    | 0    | 0    | 0    | 0     |
| 0                                                                                               | 0    | 0     | 0     | 0    | 0    | 0     | 0    | 0    | 0    | 0    | 0    | 0     |
| 0                                                                                               | 0    | 0     | 0     | 0    | 0    |       |      |      |      |      |      |       |
| "Viruses;Viruses__na;Viruses__na;Viruses__na;Viruses__na;Blackfly_DNA_Virus_12"                 |      |       |       |      |      |       |      |      |      |      |      | 0     |
| 0                                                                                               | 0    | 0     | 6     | 6    | 0    | 0     | 0    | 0    | 0    | 0    | 0    | 0     |
| 0                                                                                               | 0    | 0     | 0     | 0    | 0    | 0     | 0    | 0    | 0    | 0    | 0    | 0     |
| 0                                                                                               | 0    | 0     | 0     | 0    | 0    | 0     | 0    | 0    | 0    | 0    | 0    | 0     |
| 0                                                                                               | 0    | 0     | 0     | 0    | 0    | 0     | 1    | 0    | 0    | 0    | 0    | 0     |







[illegible]







[illegible]

|                                                                                                              |   |   |     |     |      |      |   |    |     |    |    |   |   |
|--------------------------------------------------------------------------------------------------------------|---|---|-----|-----|------|------|---|----|-----|----|----|---|---|
|                                                                                                              | 0 | 0 | 0   | 0   | 0    | 0    | 0 | 0  | 0   | 0  | 0  | 0 |   |
|                                                                                                              | 0 | 0 | 0   | 0   | 0    | 0    |   |    |     |    |    |   |   |
| "Viruses;Viruses__na;Viruses__na;Viruses__na;Viruses__na;Viruses__na;ssDNA_virus_sp."                        |   |   |     |     |      |      |   |    |     | 0  | 0  |   |   |
|                                                                                                              | 0 | 8 | 12  | 15  | 0    | 0    | 0 | 0  | 0   | 0  | 0  | 0 |   |
|                                                                                                              | 0 | 0 | 0   | 0   | 0    | 0    | 0 | 0  | 0   | 0  | 0  | 0 |   |
|                                                                                                              | 0 | 0 | 0   | 0   | 0    | 0    | 0 | 0  | 0   | 0  | 0  | 0 |   |
|                                                                                                              | 0 | 0 | 0   | 0   | 0    | 0    | 8 | 0  | 0   | 0  | 0  | 0 |   |
|                                                                                                              | 0 | 0 | 0   | 0   | 0    | 0    | 0 | 0  | 0   | 0  | 0  | 0 |   |
|                                                                                                              | 0 | 0 | 0   | 0   | 0    |      |   |    |     |    |    |   |   |
| "Viruses;Viruses__na;Viruses__na;Viruses__na;Viruses__na;Viruses__na;Streptococcus_satellite_phage_Javan327" | 0 | 0 | 0   | 0   | 0    | 0    | 0 | 0  | 0   | 0  | 0  | 0 |   |
|                                                                                                              | 0 | 0 | 0   | 0   | 0    | 0    | 0 | 0  | 0   | 0  | 0  | 0 |   |
|                                                                                                              | 0 | 0 | 0   | 0   | 0    | 0    | 0 | 0  | 0   | 0  | 0  | 0 |   |
|                                                                                                              | 0 | 0 | 0   | 0   | 0    | 0    | 1 | 0  | 0   | 0  | 0  | 0 |   |
|                                                                                                              | 0 | 0 | 0   | 0   | 0    | 0    | 0 | 0  | 0   | 0  | 0  | 0 |   |
|                                                                                                              | 0 | 0 | 0   | 0   | 0    | 0    |   |    |     |    |    |   |   |
| "Viruses;Viruses__na;Viruses__na;Viruses__na;Viruses__na;Viruses__na;Streptococcus_satellite_phage_Javan360" | 0 | 0 | 0   | 0   | 0    | 0    | 0 | 0  | 0   | 0  | 0  | 0 |   |
|                                                                                                              | 0 | 0 | 0   | 0   | 0    | 0    | 0 | 0  | 0   | 0  | 0  | 0 |   |
|                                                                                                              | 0 | 0 | 0   | 0   | 0    | 0    | 0 | 0  | 0   | 0  | 0  | 0 |   |
|                                                                                                              | 0 | 0 | 0   | 0   | 0    | 0    | 0 | 0  | 0   | 0  | 0  | 0 |   |
|                                                                                                              | 0 | 0 | 0   | 0   | 0    | 0    | 0 | 0  | 0   | 0  | 0  | 0 |   |
|                                                                                                              | 0 | 0 | 0   | 0   | 0    | 1    | 0 |    |     |    |    |   |   |
| "Viruses;Viruses__na;Viruses__na;Viruses__na;Viruses__na;Viruses__na;Streptomyces_phage_Dagobah" 0           | 1 | 0 | 0   | 0   | 0    | 0    | 0 | 0  | 0   | 0  | 0  | 0 |   |
|                                                                                                              | 0 | 0 | 0   | 0   | 0    | 0    | 0 | 0  | 0   | 0  | 0  | 0 |   |
|                                                                                                              | 0 | 0 | 0   | 0   | 0    | 0    | 0 | 0  | 0   | 0  | 0  | 0 |   |
|                                                                                                              | 0 | 0 | 0   | 0   | 0    | 0    | 0 | 0  | 0   | 0  | 0  | 0 |   |
|                                                                                                              | 0 | 0 | 0   | 0   | 0    | 0    | 0 | 0  | 0   | 0  | 0  | 0 |   |
|                                                                                                              | 0 | 0 | 0   | 0   | 0    |      |   |    |     |    |    |   |   |
| "Viruses;Viruses__na;Viruses__na;Viruses__na;Viruses__na;Viruses__na;Synechococcus_phage_S-EIVI" 0           | 0 | 0 | 0   | 11  | 0    | 0    | 0 | 0  | 0   | 0  | 0  | 0 |   |
|                                                                                                              | 0 | 0 | 0   | 0   | 0    | 0    | 0 | 0  | 0   | 0  | 0  | 0 |   |
|                                                                                                              | 0 | 0 | 0   | 0   | 0    | 0    | 0 | 0  | 0   | 0  | 0  | 0 |   |
|                                                                                                              | 0 | 0 | 0   | 0   | 0    | 0    | 0 | 0  | 0   | 0  | 0  | 0 |   |
|                                                                                                              | 0 | 0 | 0   | 0   | 0    | 0    | 0 | 0  | 0   | 0  | 0  | 0 |   |
|                                                                                                              | 0 | 0 | 0   | 0   | 0    |      |   |    |     |    |    |   |   |
| "Viruses;Viruses__na;Viruses__na;Viruses__na;Viruses__na;Viruses__na;Tick-associated_circular_DNA_satellite" |   |   |     |     | 0    | 0    | 8 | 17 | 131 | 22 | 0  | 0 | 0 |
|                                                                                                              | 0 | 0 | 0   | 0   | 0    | 0    | 0 | 1  | 15  | 0  | 0  | 0 | 0 |
|                                                                                                              | 0 | 0 | 0   | 0   | 0    | 0    | 0 | 0  | 0   | 0  | 0  | 0 | 0 |
|                                                                                                              | 0 | 0 | 0   | 1   | 0    | 0    | 0 | 0  | 0   | 1  | 0  | 0 | 1 |
|                                                                                                              | 0 | 0 | 0   | 0   | 0    | 0    | 0 | 0  | 0   | 0  | 0  | 0 | 0 |
|                                                                                                              | 0 | 0 | 0   | 0   | 0    | 0    | 0 | 0  | 0   | 1  | 0  |   |   |
| "Viruses;Viruses__na;Viruses__na;Viruses__na;Viruses__na;Viruses__na;Tick-associated_circular_DNA_virus"     | 1 | 2 | 165 | 522 | 2030 | 5624 | 0 | 0  | 0   | 0  | 0  | 0 | 0 |
|                                                                                                              | 0 | 0 | 0   | 37  | 38   | 0    | 0 | 1  | 0   | 9  | 16 | 0 | 0 |
|                                                                                                              | 2 | 0 | 0   | 1   | 0    | 0    | 0 | 0  | 17  | 5  | 0  | 0 | 0 |
|                                                                                                              | 2 | 6 | 257 | 0   | 0    | 15   | 3 | 20 | 203 | 0  | 0  | 1 | 0 |

|                                                                                                      |    |     |     |    |    |    |    |   |   |   |   |   |
|------------------------------------------------------------------------------------------------------|----|-----|-----|----|----|----|----|---|---|---|---|---|
| 1                                                                                                    | 47 | 0   | 0   | 0  | 0  | 0  | 0  | 0 | 0 | 0 | 0 | 0 |
| 0                                                                                                    | 0  | 0   | 0   | 0  | 84 | 0  |    |   |   |   |   |   |
| "Viruses;Viruses__na;Viruses__na;Viruses__na;Viruses__na;Viruses__na;uncultured_archaeal_virus"      |    |     |     |    |    |    |    |   |   |   |   | 0 |
| 0                                                                                                    | 0  | 0   | 0   | 7  | 0  | 0  | 0  | 0 | 0 | 0 | 0 | 0 |
| 0                                                                                                    | 0  | 0   | 0   | 0  | 0  | 0  | 0  | 0 | 0 | 0 | 0 | 0 |
| 0                                                                                                    | 0  | 0   | 0   | 0  | 0  | 0  | 0  | 0 | 0 | 0 | 0 | 0 |
| 0                                                                                                    | 0  | 0   | 0   | 0  | 0  | 0  | 0  | 0 | 0 | 0 | 0 | 0 |
| 0                                                                                                    | 0  | 0   | 0   | 0  | 0  | 0  | 0  | 0 | 0 | 0 | 0 | 0 |
| 0                                                                                                    | 0  | 0   | 0   | 0  | 0  | 0  | 0  | 0 | 0 | 0 | 0 | 0 |
| "Viruses;Viruses__na;Viruses__na;Viruses__na;Viruses__na;Viruses__na;uncultured_cyanophage"          |    |     |     |    |    |    |    |   |   |   |   | 1 |
| 0                                                                                                    | 0  | 2   | 17  | 1  | 0  | 0  | 0  | 1 | 0 | 0 | 0 | 0 |
| 0                                                                                                    | 0  | 0   | 1   | 0  | 0  | 0  | 0  | 0 | 0 | 0 | 0 | 0 |
| 0                                                                                                    | 0  | 0   | 0   | 0  | 0  | 0  | 0  | 0 | 0 | 0 | 0 | 0 |
| 0                                                                                                    | 1  | 0   | 0   | 0  | 0  | 0  | 0  | 0 | 0 | 0 | 0 | 0 |
| 0                                                                                                    | 0  | 0   | 0   | 0  | 0  | 0  | 0  | 0 | 0 | 0 | 0 | 0 |
| 0                                                                                                    | 0  | 0   | 0   | 0  | 0  |    |    |   |   |   |   |   |
| "Viruses;Viruses__na;Viruses__na;Viruses__na;Viruses__na;Viruses__na;uncultured_marine_phage"        |    |     |     |    |    |    |    |   |   |   |   | 0 |
| 0                                                                                                    | 0  | 0   | 13  | 21 | 0  | 0  | 0  | 0 | 0 | 0 | 0 | 0 |
| 0                                                                                                    | 0  | 0   | 0   | 0  | 0  | 0  | 0  | 0 | 0 | 0 | 0 | 0 |
| 0                                                                                                    | 0  | 0   | 0   | 0  | 0  | 0  | 0  | 0 | 0 | 0 | 0 | 0 |
| 0                                                                                                    | 0  | 0   | 0   | 0  | 0  | 0  | 0  | 0 | 0 | 0 | 0 | 1 |
| 0                                                                                                    | 0  | 0   | 0   | 0  | 0  | 0  | 0  | 0 | 0 | 0 | 0 | 0 |
| 1                                                                                                    | 0  | 0   | 0   | 0  | 0  |    |    |   |   |   |   |   |
| "Viruses;Viruses__na;Viruses__na;Viruses__na;Viruses__na;Viruses__na;uncultured_marine_virus"        |    |     |     |    |    |    |    |   |   |   |   | 1 |
| 3                                                                                                    | 4  | 14  | 84  | 64 | 0  | 0  | 0  | 0 | 0 | 0 | 1 | 0 |
| 0                                                                                                    | 0  | 4   | 0   | 0  | 0  | 0  | 0  | 2 | 0 | 0 | 0 | 0 |
| 0                                                                                                    | 0  | 1   | 0   | 0  | 0  | 0  | 0  | 0 | 0 | 0 | 0 | 0 |
| 0                                                                                                    | 0  | 0   | 0   | 0  | 1  | 0  | 14 | 0 | 0 | 0 | 0 | 1 |
| 0                                                                                                    | 0  | 0   | 0   | 0  | 0  | 0  | 0  | 0 | 0 | 0 | 0 | 0 |
| 0                                                                                                    | 0  | 0   | 0   | 6  | 0  |    |    |   |   |   |   |   |
| "Viruses;Viruses__na;Viruses__na;Viruses__na;Viruses__na;Viruses__na;uncultured_Mediterranean_phage" |    |     |     |    |    |    |    |   |   |   |   |   |
| 0                                                                                                    | 0  | 0   | 0   | 8  | 1  | 0  | 0  | 0 | 0 | 0 | 0 | 0 |
| 0                                                                                                    | 0  | 0   | 0   | 0  | 0  | 0  | 0  | 0 | 0 | 0 | 0 | 0 |
| 0                                                                                                    | 0  | 0   | 0   | 0  | 0  | 0  | 0  | 0 | 0 | 0 | 0 | 0 |
| 0                                                                                                    | 0  | 0   | 0   | 0  | 0  | 0  | 0  | 4 | 0 | 0 | 0 | 0 |
| 0                                                                                                    | 0  | 0   | 0   | 0  | 0  | 0  | 0  | 0 | 0 | 0 | 0 | 0 |
| 0                                                                                                    | 0  | 0   | 0   | 0  | 2  | 0  |    |   |   |   |   |   |
| "Viruses;Viruses__na;Viruses__na;Viruses__na;Viruses__na;Viruses__na;uncultured_phage"               |    |     |     |    |    |    |    |   |   |   |   | 1 |
| 1                                                                                                    | 3  | 2   | 4   | 0  | 0  | 0  | 0  | 0 | 0 | 0 | 0 | 0 |
| 0                                                                                                    | 0  | 0   | 0   | 0  | 0  | 0  | 0  | 0 | 0 | 0 | 0 | 0 |
| 0                                                                                                    | 0  | 0   | 0   | 0  | 0  | 0  | 0  | 0 | 0 | 0 | 0 | 0 |
| 0                                                                                                    | 0  | 0   | 4   | 0  | 0  | 3  | 0  | 0 | 0 | 0 | 0 | 0 |
| 0                                                                                                    | 0  | 0   | 0   | 0  | 0  | 0  | 0  | 0 | 0 | 0 | 0 | 0 |
| 0                                                                                                    | 0  | 0   | 0   | 0  |    |    |    |   |   |   |   |   |
| "Viruses;Viruses__na;Viruses__na;Viruses__na;Viruses__na;Viruses__na;uncultured_virus"               |    |     |     |    |    |    |    |   |   |   |   | 7 |
| 16                                                                                                   | 52 | 398 | 236 | 0  | 0  | 0  | 0  | 0 | 0 | 0 | 0 | 2 |
| 0                                                                                                    | 0  | 0   | 0   | 0  | 0  | 0  | 1  | 7 | 0 | 0 | 0 | 0 |
| 0                                                                                                    | 0  | 0   | 0   | 0  | 0  | 1  | 0  | 0 | 0 | 0 | 0 | 1 |
| 12                                                                                                   | 0  | 0   | 1   | 0  | 10 | 39 | 0  | 0 | 0 | 1 | 1 | 1 |

|                                                                                               |    |     |    |    |   |    |   |   |   |    |    |    |
|-----------------------------------------------------------------------------------------------|----|-----|----|----|---|----|---|---|---|----|----|----|
| 0                                                                                             | 0  | 0   | 0  | 0  | 0 | 0  | 0 | 0 | 0 | 0  | 0  | 0  |
| 0                                                                                             | 0  | 0   | 7  | 0  |   |    |   |   |   |    |    |    |
| "Viruses;Viruses__na;Viruses__na;Viruses__na;Viruses__na;Viruses__na;Variovorax_phage_VAC_51" |    |     |    |    |   |    |   |   |   |    |    | 0  |
| 0                                                                                             | 0  | 0   | 1  | 0  | 0 | 0  | 0 | 0 | 0 | 0  | 0  | 0  |
| 0                                                                                             | 0  | 1   | 0  | 0  | 0 | 0  | 0 | 0 | 0 | 0  | 0  | 0  |
| 0                                                                                             | 0  | 0   | 0  | 0  | 0 | 0  | 0 | 0 | 0 | 0  | 0  | 0  |
| 0                                                                                             | 0  | 0   | 0  | 0  | 0 | 0  | 0 | 0 | 0 | 0  | 0  | 0  |
| 0                                                                                             | 0  | 0   | 0  | 0  | 0 | 0  | 0 | 0 | 0 | 0  | 0  | 0  |
| 0                                                                                             | 0  | 0   | 0  | 0  | 0 |    |   |   |   |    |    |    |
| "Viruses;Viruses__na;Viruses__na;Viruses__na;Viruses__na;Viruses__na;Vibrio_phage_VH-P22"     |    |     |    |    |   |    |   |   |   |    |    | 0  |
| 0                                                                                             | 1  | 0   | 0  | 0  | 0 | 0  | 0 | 0 | 0 | 0  | 0  | 0  |
| 0                                                                                             | 0  | 0   | 0  | 0  | 0 | 0  | 0 | 0 | 0 | 0  | 0  | 0  |
| 0                                                                                             | 0  | 0   | 0  | 0  | 0 | 0  | 0 | 0 | 0 | 0  | 0  | 0  |
| 0                                                                                             | 0  | 0   | 0  | 0  | 0 | 0  | 0 | 0 | 0 | 0  | 0  | 0  |
| 0                                                                                             | 0  | 0   | 0  | 0  | 0 | 0  | 0 | 0 | 0 | 0  | 0  | 0  |
| 0                                                                                             | 0  | 0   | 0  | 0  |   |    |   |   |   |    |    |    |
| "Viruses;Viruses__na;Viruses__na;Viruses__na;Viruses__na;Viruses__na;Virus_NIOZ-UU157"        |    |     |    |    |   |    |   |   |   |    |    | 0  |
| 2                                                                                             | 4  | 184 | 47 | 0  | 0 | 0  | 0 | 0 | 0 | 0  | 0  | 0  |
| 0                                                                                             | 0  | 0   | 0  | 0  | 0 | 0  | 0 | 0 | 0 | 0  | 0  | 0  |
| 0                                                                                             | 0  | 0   | 0  | 0  | 0 | 0  | 0 | 0 | 0 | 0  | 0  | 0  |
| 0                                                                                             | 0  | 0   | 0  | 0  | 0 | 10 | 0 | 0 | 0 | 0  | 0  | 0  |
| 0                                                                                             | 0  | 0   | 0  | 0  | 0 | 0  | 0 | 0 | 0 | 0  | 0  | 0  |
| 0                                                                                             | 0  | 0   | 1  | 0  |   |    |   |   |   |    |    |    |
| "Viruses;Viruses__na;Viruses__na;Viruses__na;Viruses__na;Viruses__na;Virus_Rctr71"            |    |     |    |    |   |    |   |   |   |    |    | 0  |
| 0                                                                                             | 0  | 0   | 0  | 0  | 0 | 0  | 0 | 0 | 0 | 0  | 0  | 0  |
| 0                                                                                             | 0  | 0   | 0  | 0  | 0 | 0  | 0 | 0 | 0 | 0  | 0  | 0  |
| 0                                                                                             | 0  | 0   | 0  | 0  | 0 | 0  | 0 | 0 | 0 | 0  | 0  | 0  |
| 0                                                                                             | 0  | 0   | 0  | 0  | 3 | 0  | 0 | 0 | 0 | 0  | 0  | 0  |
| 0                                                                                             | 0  | 0   | 0  | 0  | 0 | 0  | 0 | 0 | 0 | 0  | 0  | 0  |
| 0                                                                                             | 0  | 0   | 0  |    |   |    |   |   |   |    |    |    |
| "Viruses;Viruses__na;Viruses__na;Viruses__na;Viruses__na;Viruses__na;Virus_sp."               |    |     |    |    |   |    |   |   |   |    |    | 0  |
| 0                                                                                             | 0  | 0   | 0  | 0  | 0 | 0  | 0 | 2 | 0 | 0  | 0  | 0  |
| 0                                                                                             | 0  | 0   | 0  | 0  | 0 | 0  | 0 | 0 | 0 | 0  | 0  | 0  |
| 0                                                                                             | 0  | 0   | 0  | 0  | 0 | 0  | 0 | 0 | 0 | 0  | 0  | 0  |
| 0                                                                                             | 0  | 0   | 0  | 0  | 0 | 0  | 0 | 0 | 1 | 0  | 0  | 0  |
| 0                                                                                             | 0  | 0   | 0  | 0  | 0 | 0  | 0 | 0 | 0 | 0  | 0  | 0  |
| 0                                                                                             | 0  | 0   | 0  |    |   |    |   |   |   |    |    |    |
| "Viruses;Viruses__na;Viruses__na;Viruses__na;Viruses__na;Viruses__na;virus_sp._ct1Hk25"       |    |     |    |    |   |    |   |   |   |    |    | 0  |
| 0                                                                                             | 0  | 0   | 0  | 0  | 0 | 0  | 0 | 0 | 0 | 0  | 0  | 0  |
| 0                                                                                             | 0  | 0   | 0  | 0  | 0 | 0  | 0 | 0 | 0 | 0  | 0  | 0  |
| 0                                                                                             | 0  | 0   | 0  | 0  | 0 | 0  | 0 | 0 | 0 | 0  | 0  | 0  |
| 0                                                                                             | 0  | 0   | 0  | 0  | 0 | 0  | 0 | 0 | 0 | 0  | 0  | 0  |
| 0                                                                                             | 0  | 0   | 0  | 0  | 0 | 0  | 0 | 0 | 0 | 0  | 0  | 0  |
| 1                                                                                             | 0  | 0   | 0  | 0  |   |    |   |   |   |    |    |    |
| "Viruses;Viruses__na;Viruses__na;Viruses__na;Viruses__na;Viruses__na;virus_sp._ct5rm7"        |    |     |    |    |   |    |   |   |   |    |    | 0  |
| 0                                                                                             | 0  | 0   | 0  | 0  | 0 | 0  | 0 | 0 | 0 | 24 | 10 | 11 |
| 15                                                                                            | 21 | 14  | 20 | 14 | 1 | 3  | 1 | 0 | 1 | 1  | 3  | 0  |
| 0                                                                                             | 0  | 0   | 1  | 0  | 0 | 0  | 0 | 2 | 6 | 0  | 2  | 0  |
| 0                                                                                             | 18 | 10  | 0  | 0  | 0 | 0  | 1 | 0 | 0 | 0  | 0  | 0  |









[illegible]

[illegible]
