# Supplementary material for: Comparison of Experimental Methodologies Based on Bulk-Metagenome and Virus-like Particle Enrichment: Pros and Cons for Representativeness and Reproducibility in the Study of the Fecal Human Virome
Source: MDPI journal article supplement (doi:10.3390/microorganisms12010162), 2024-01-13
Supplement: s1 [file s1]

Volunteer: 02

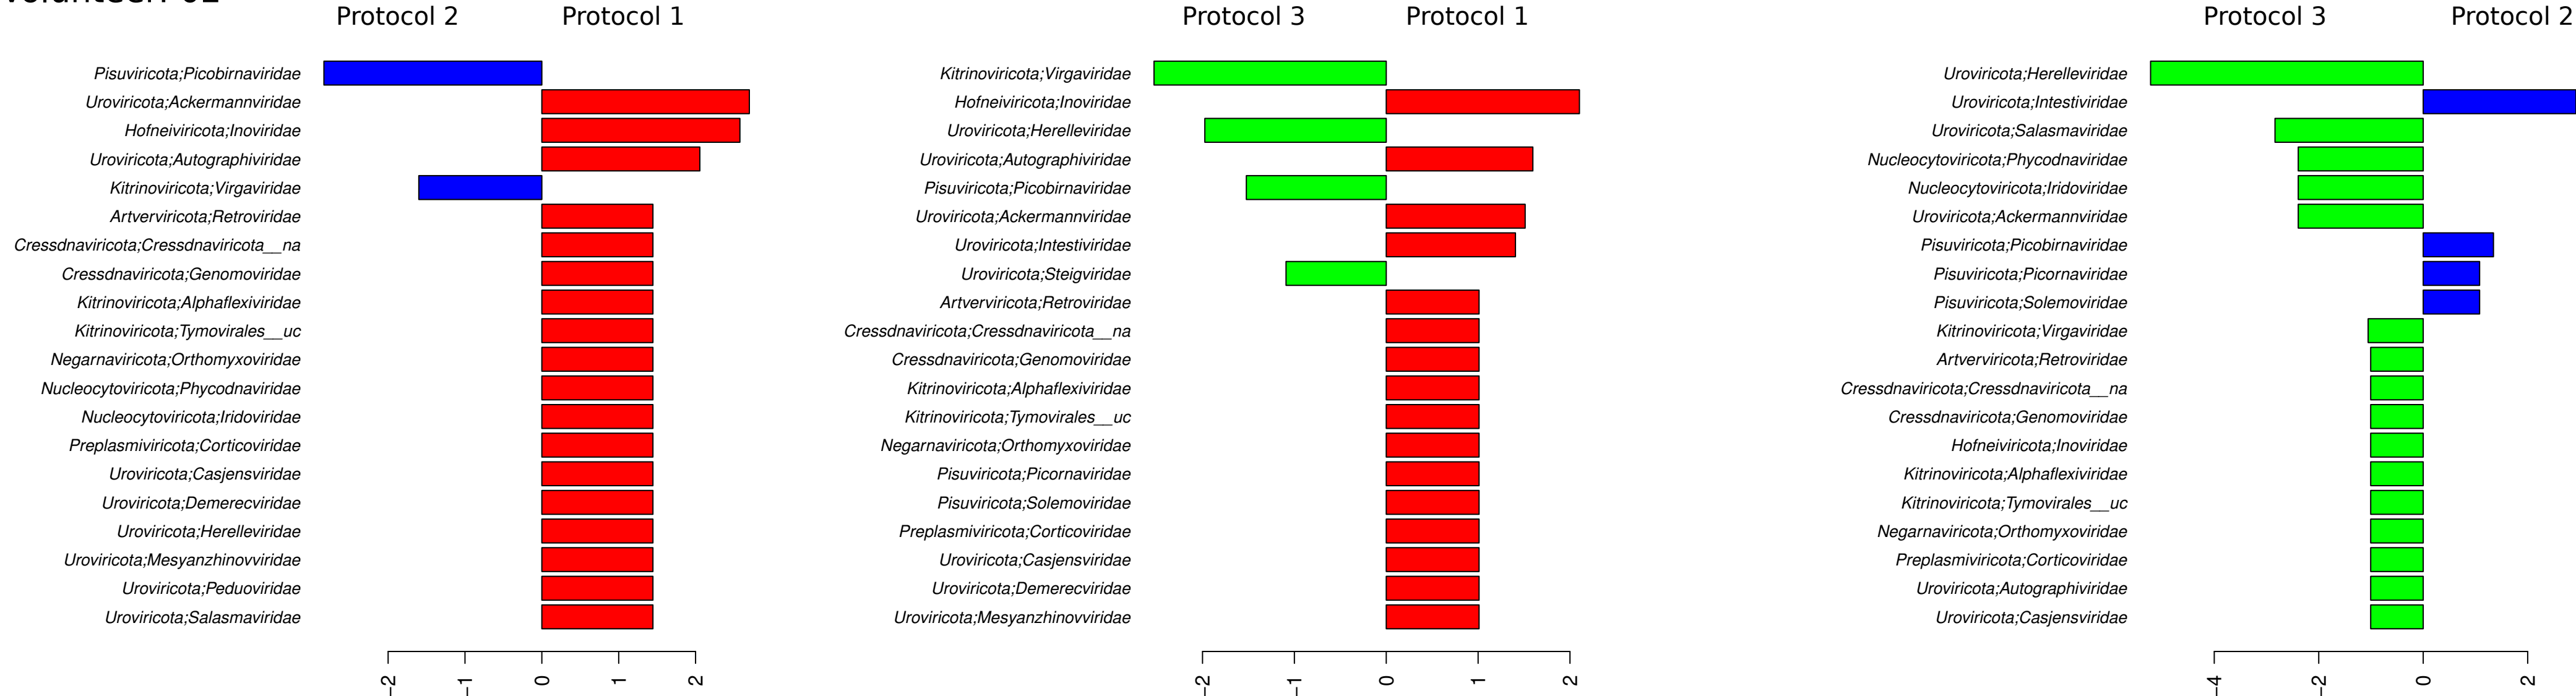

Volunteer: 03

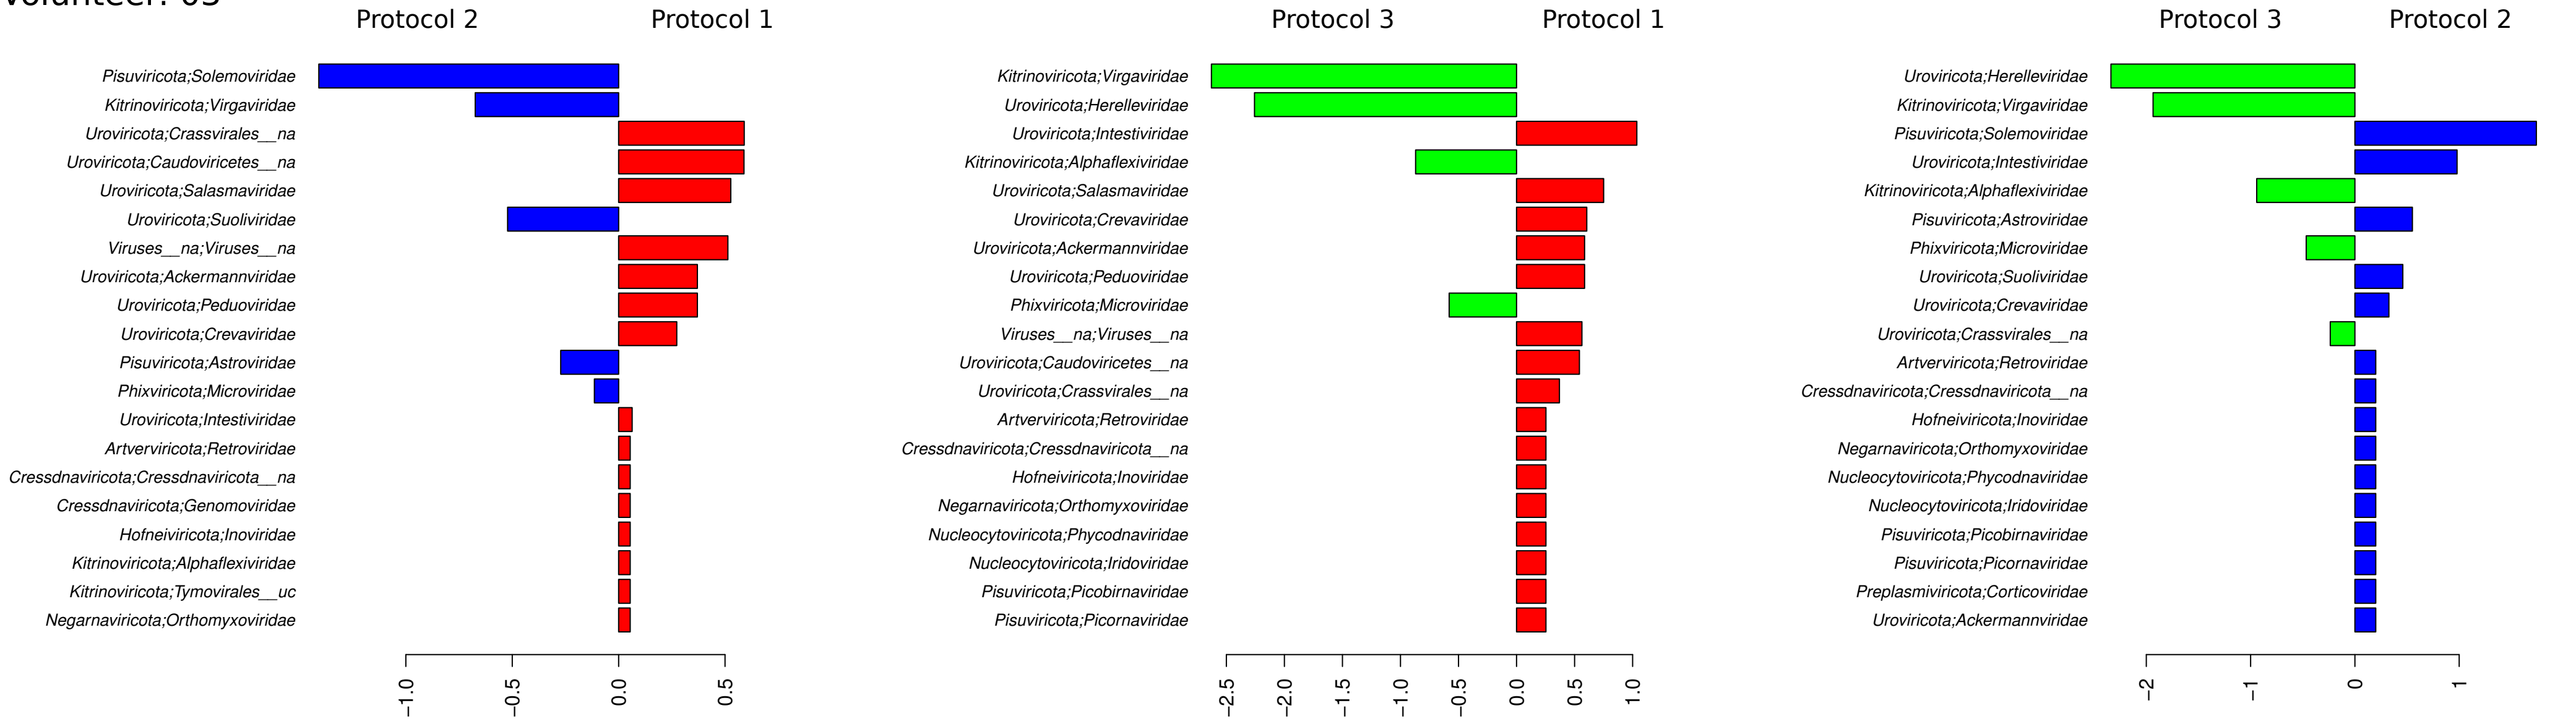

Volunteer: 05

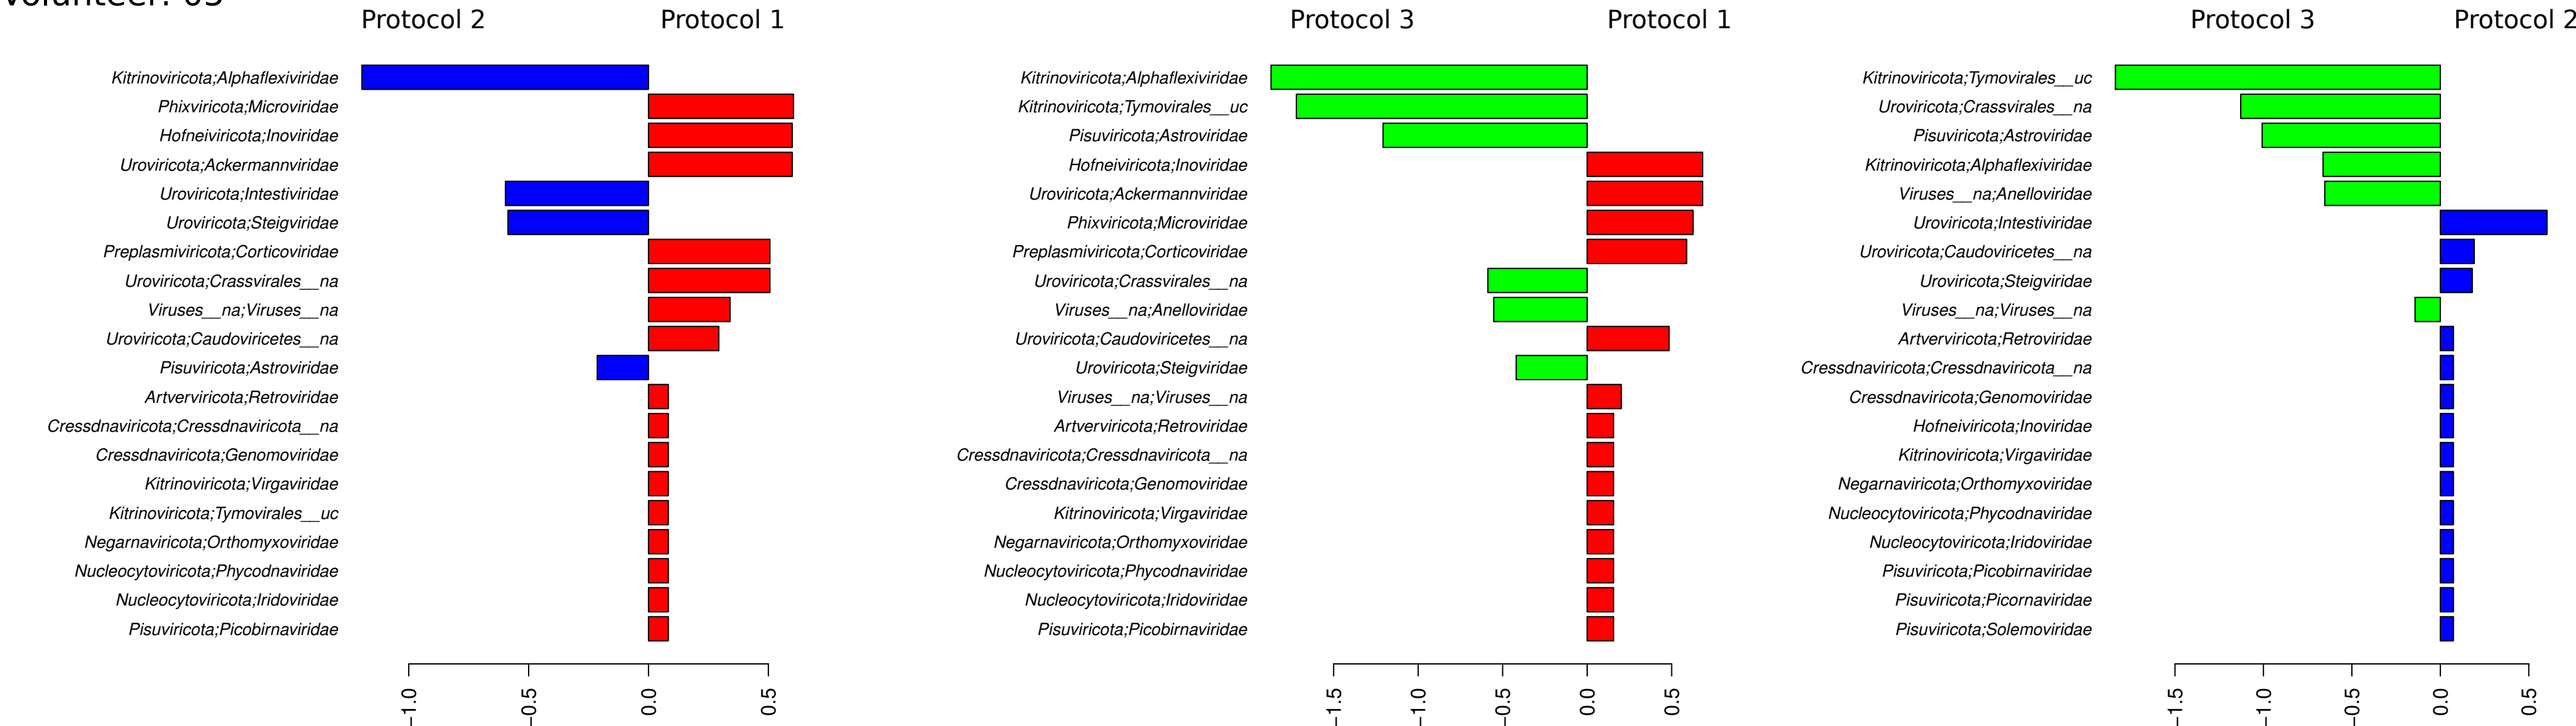

Volunteer: 06

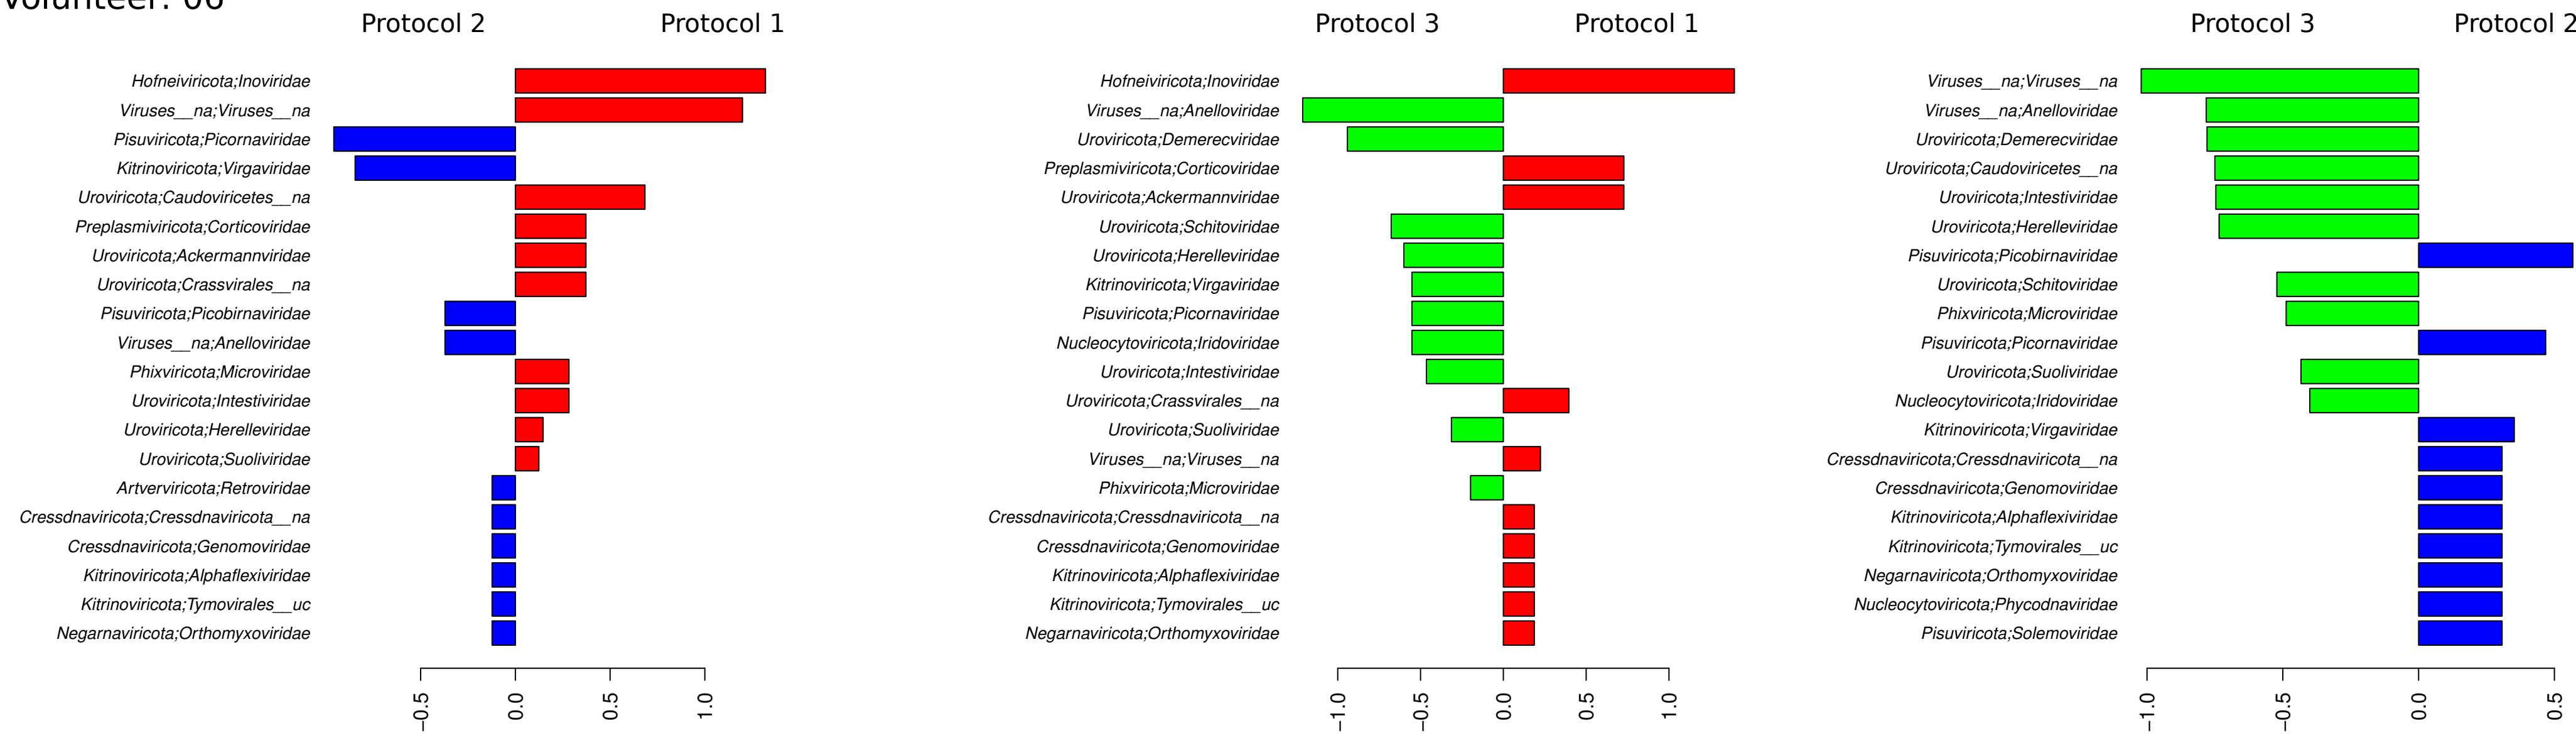

Volunteer: 07

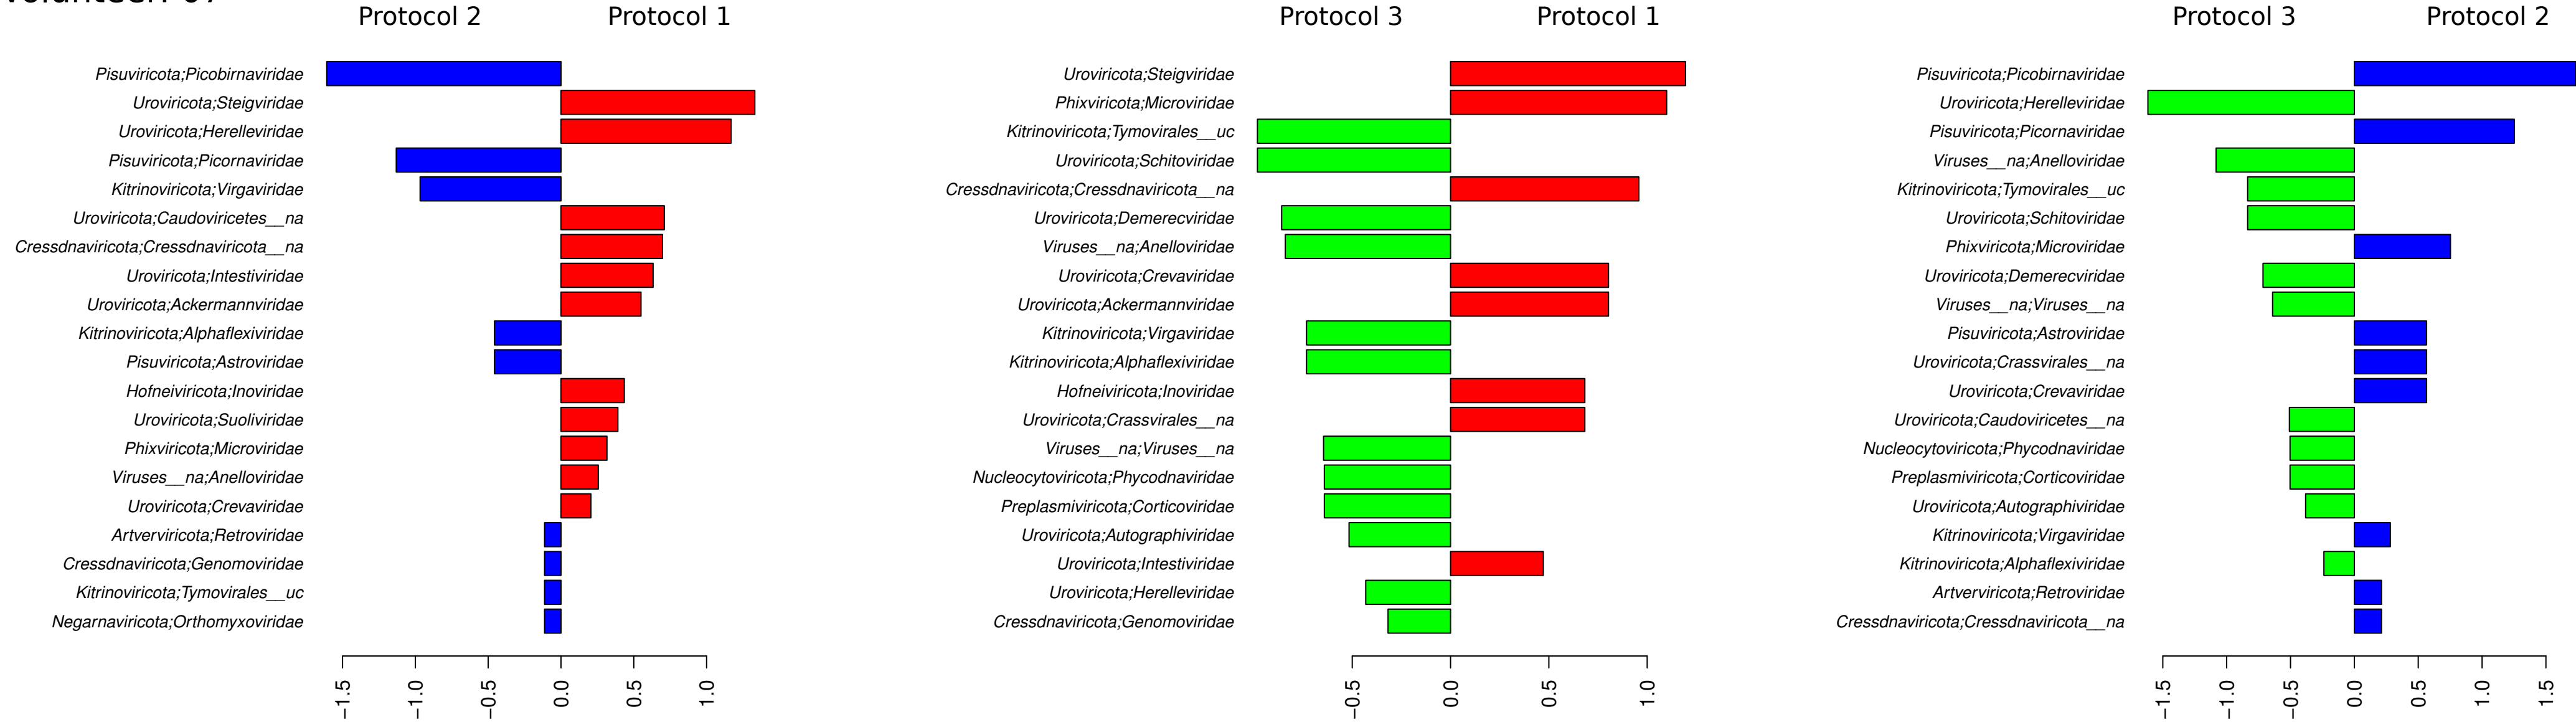

Volunteer: 08

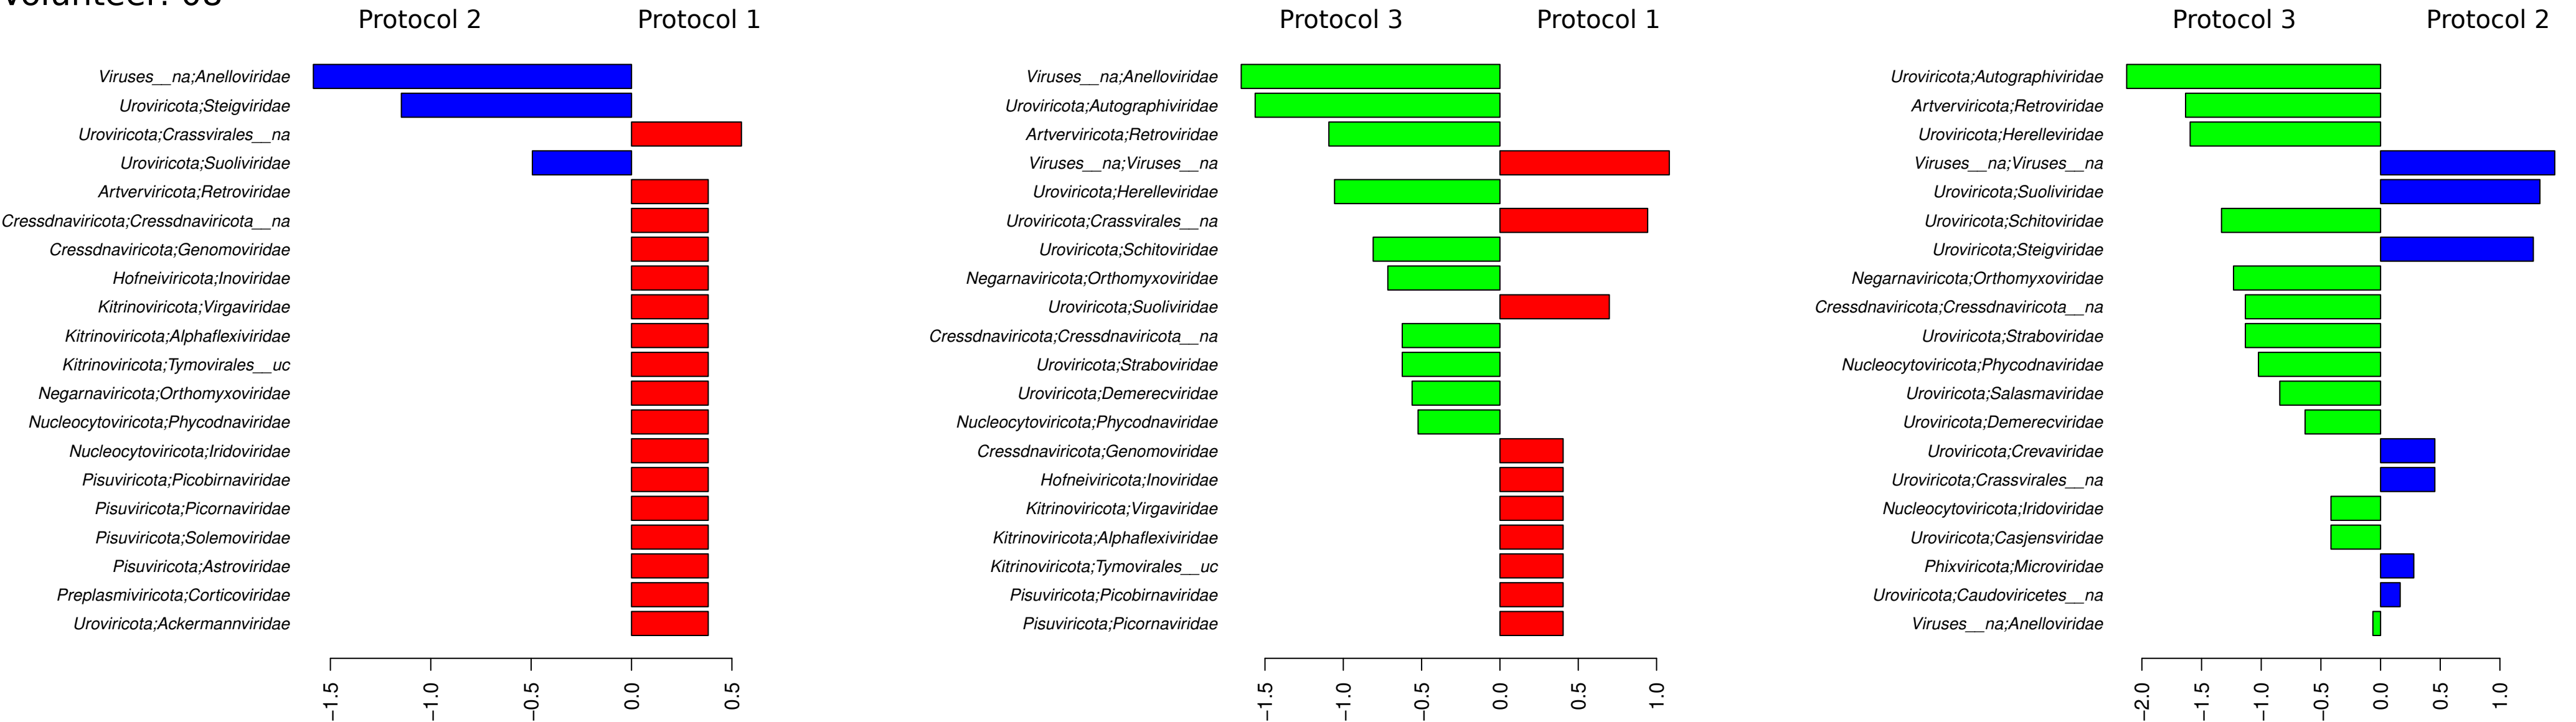

Volunteer: 09

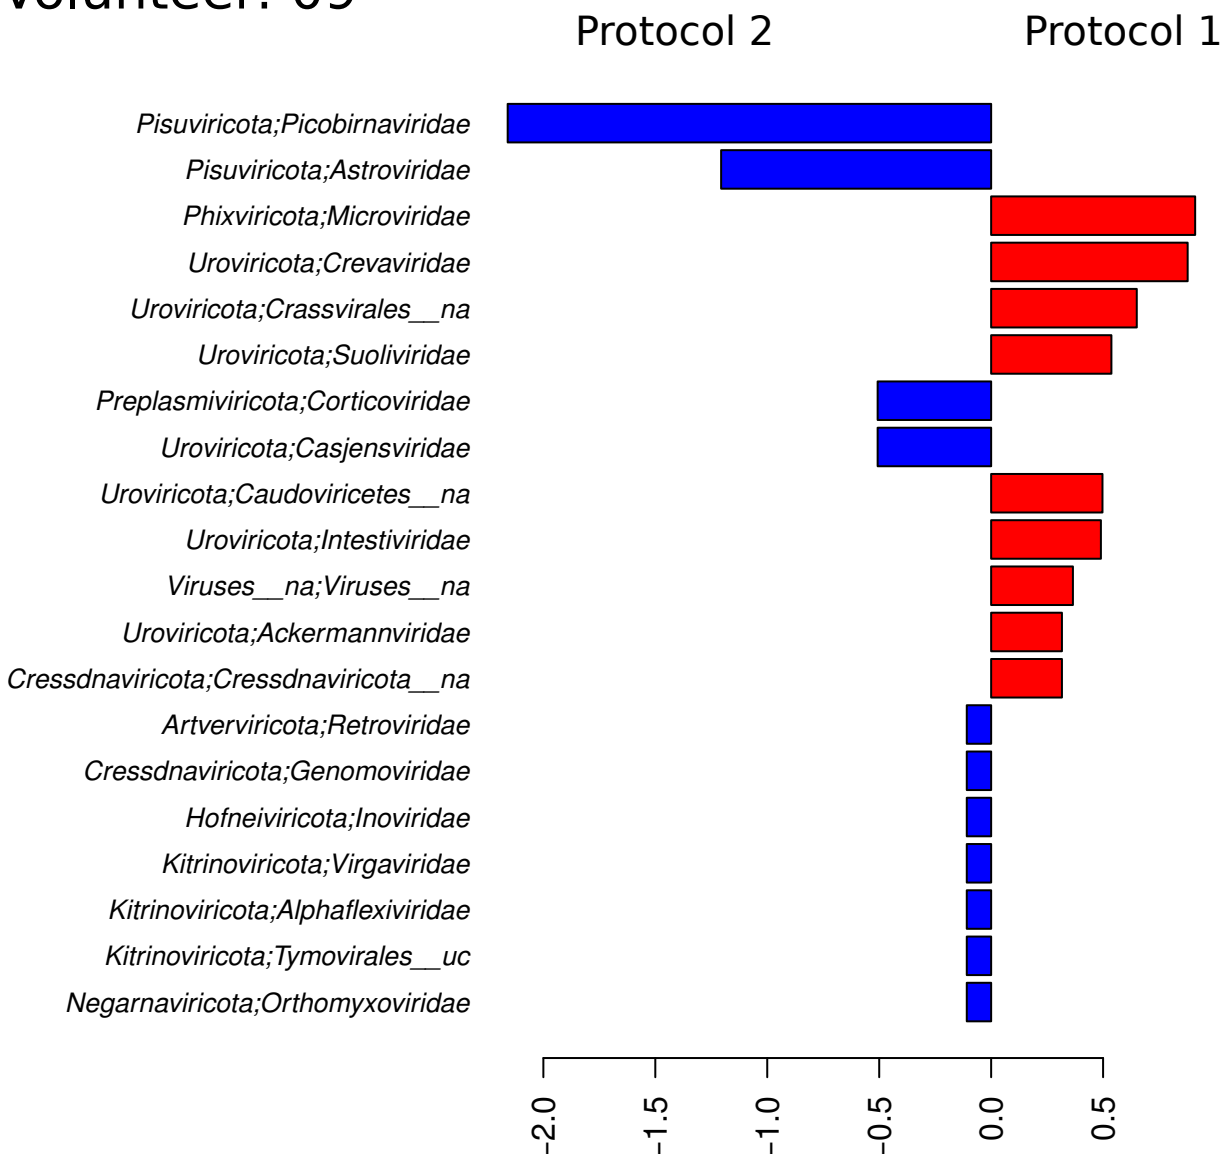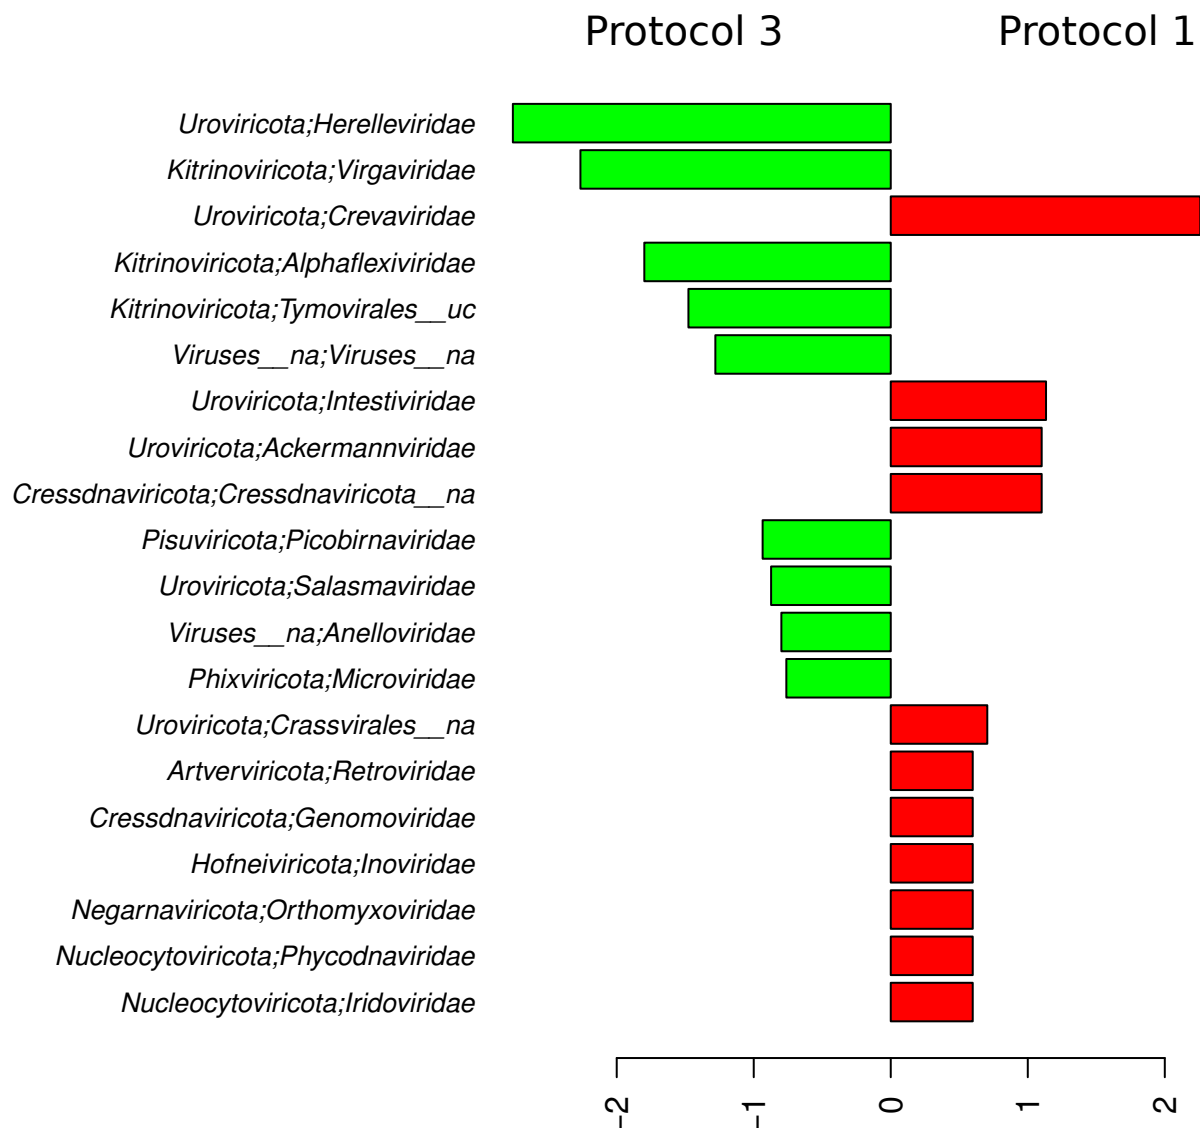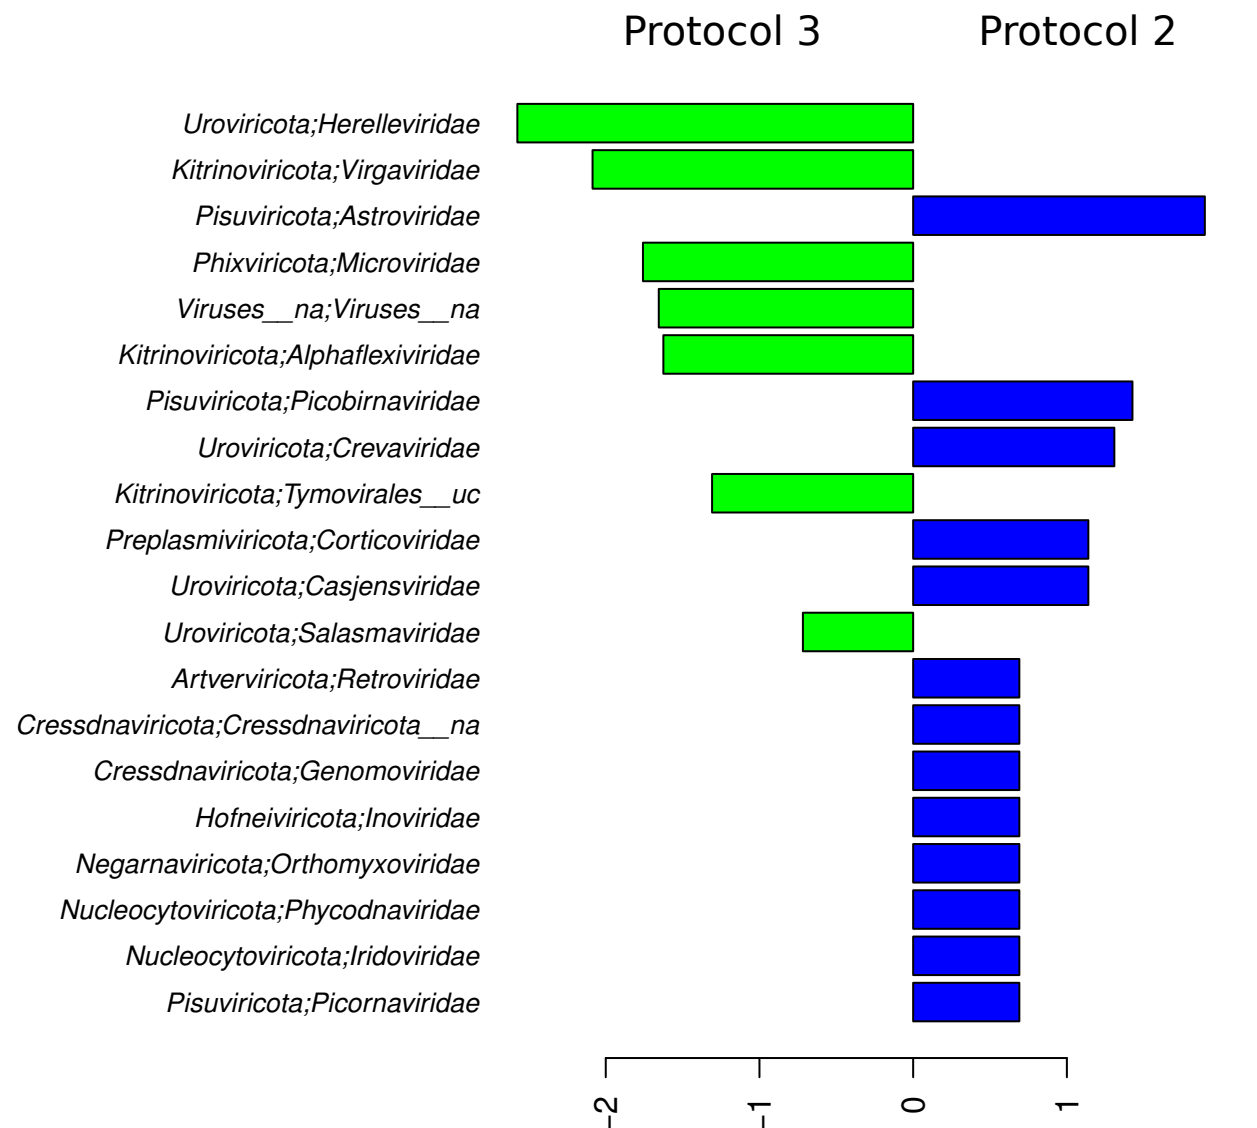

Volunteer: 13

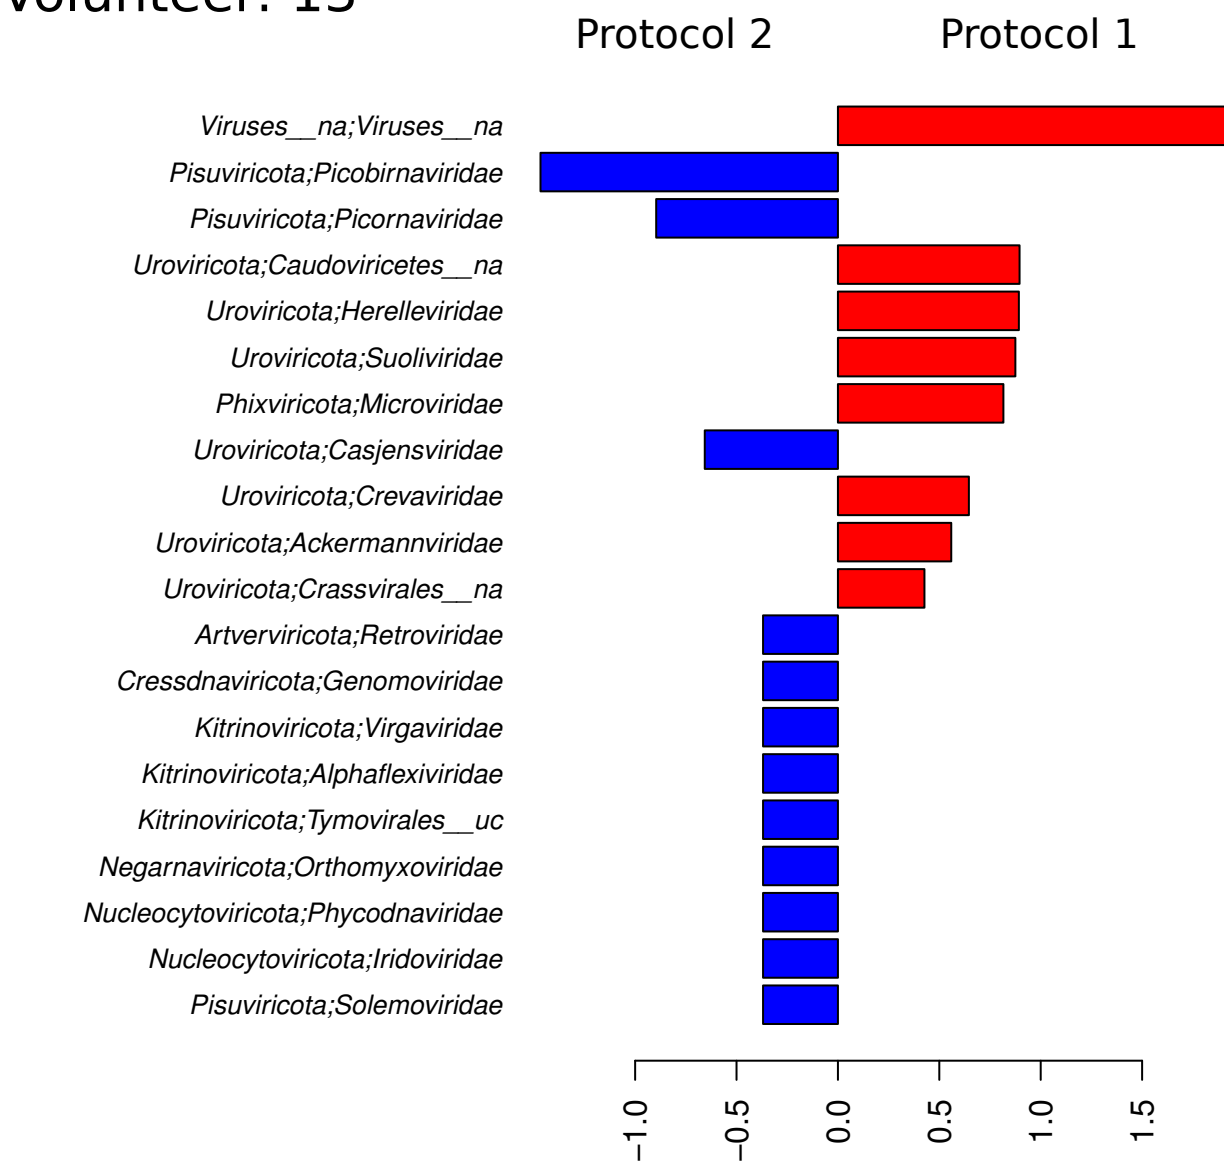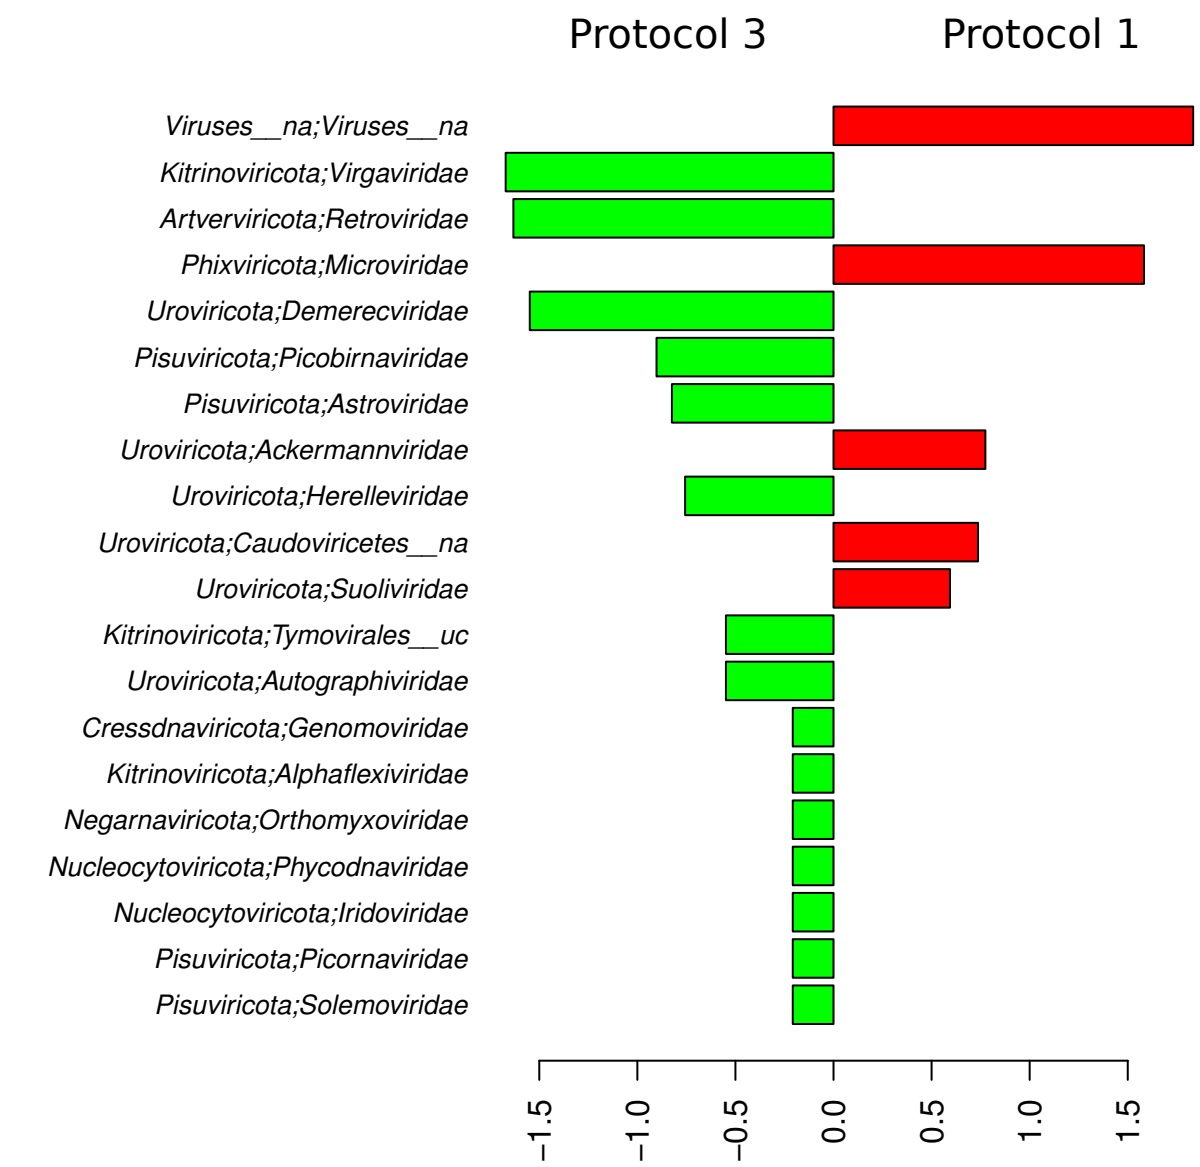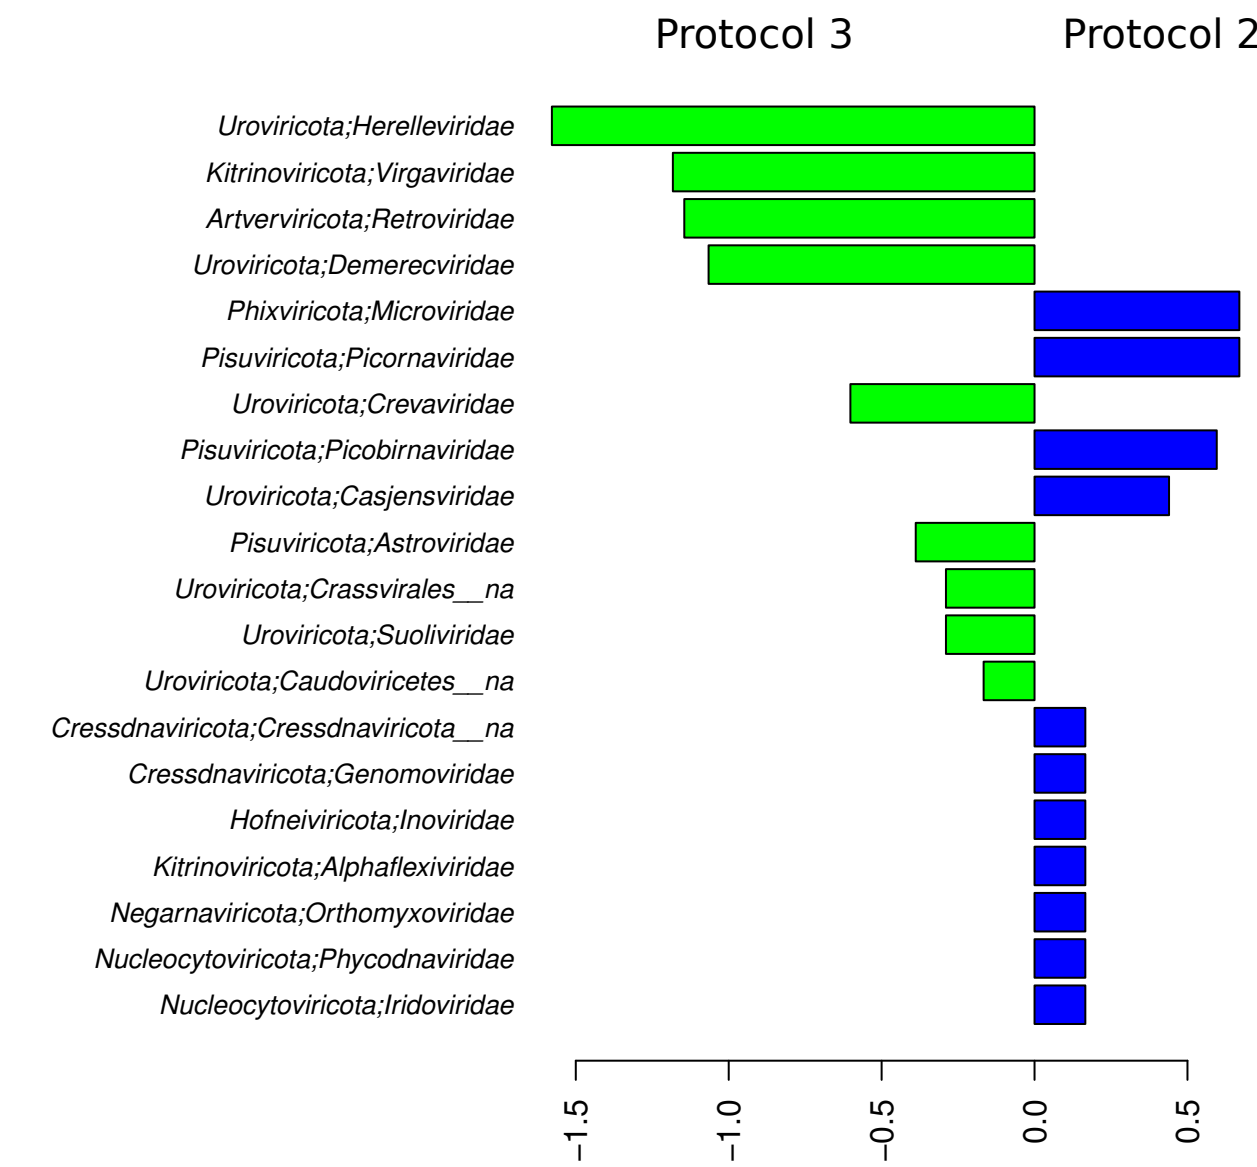



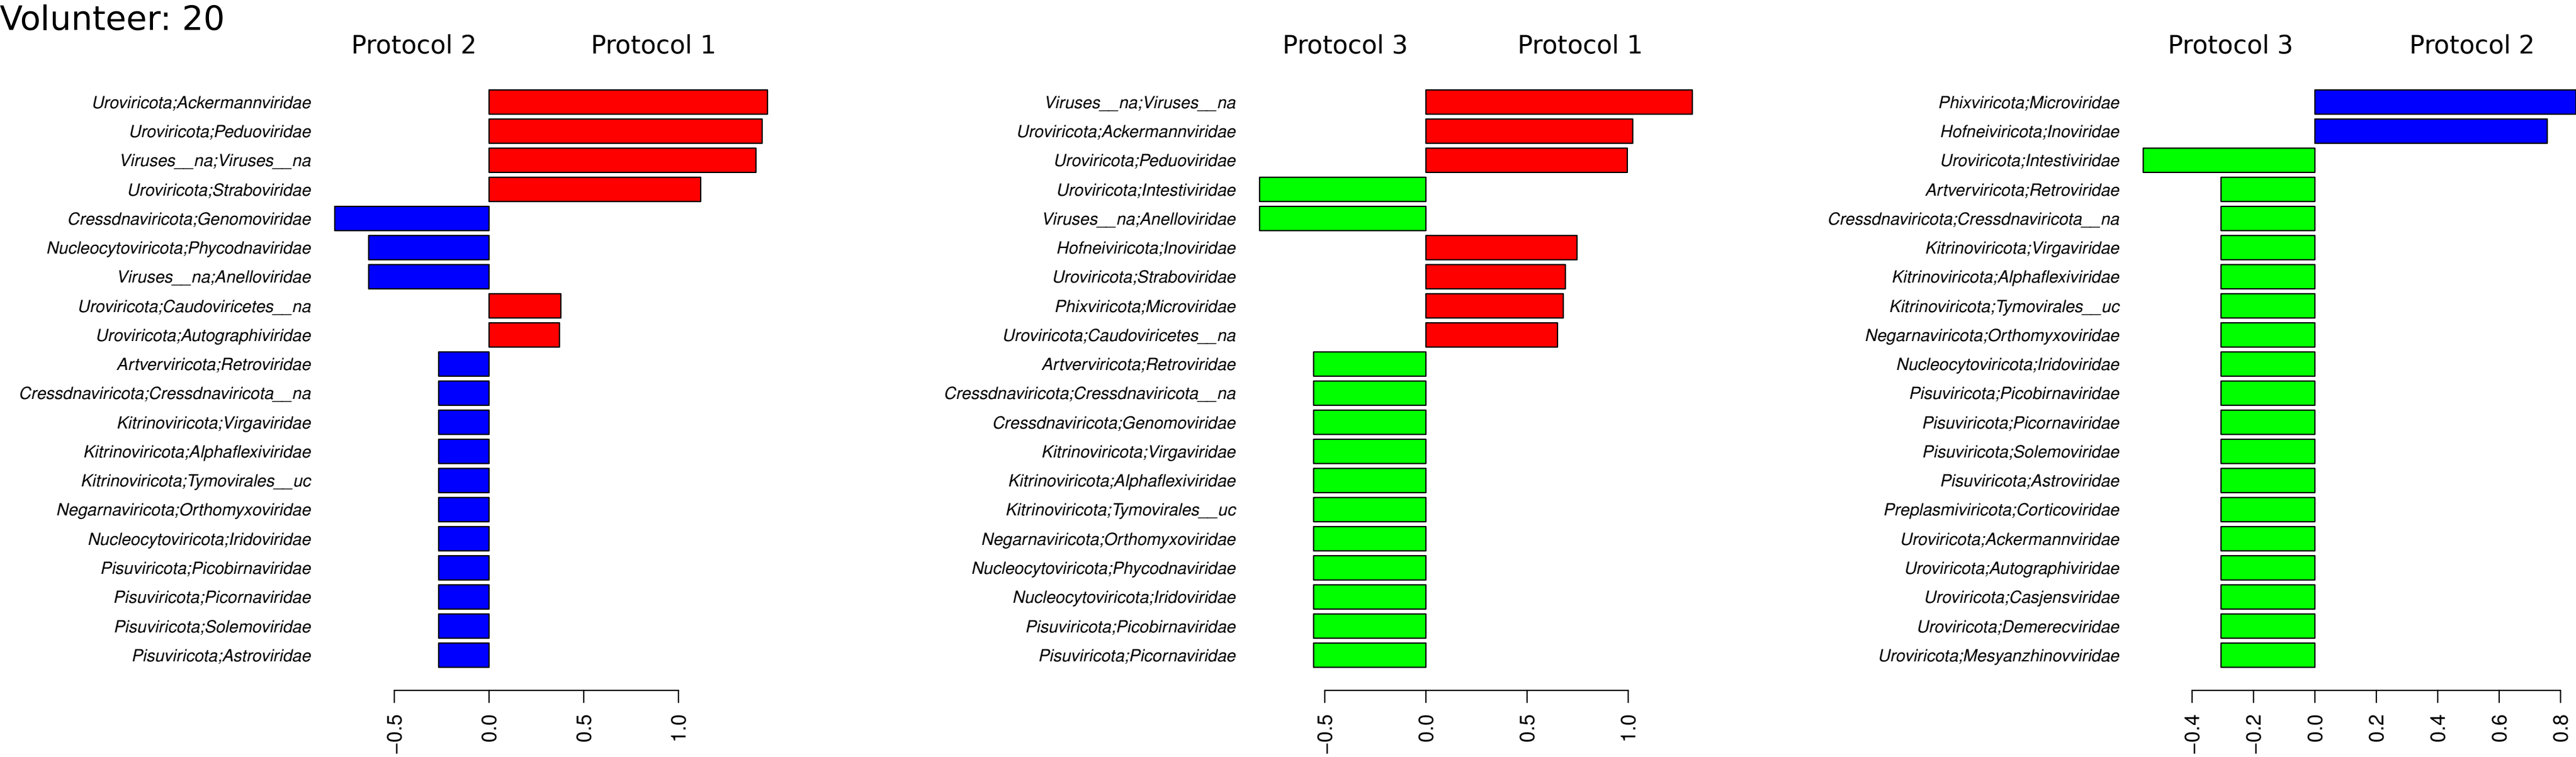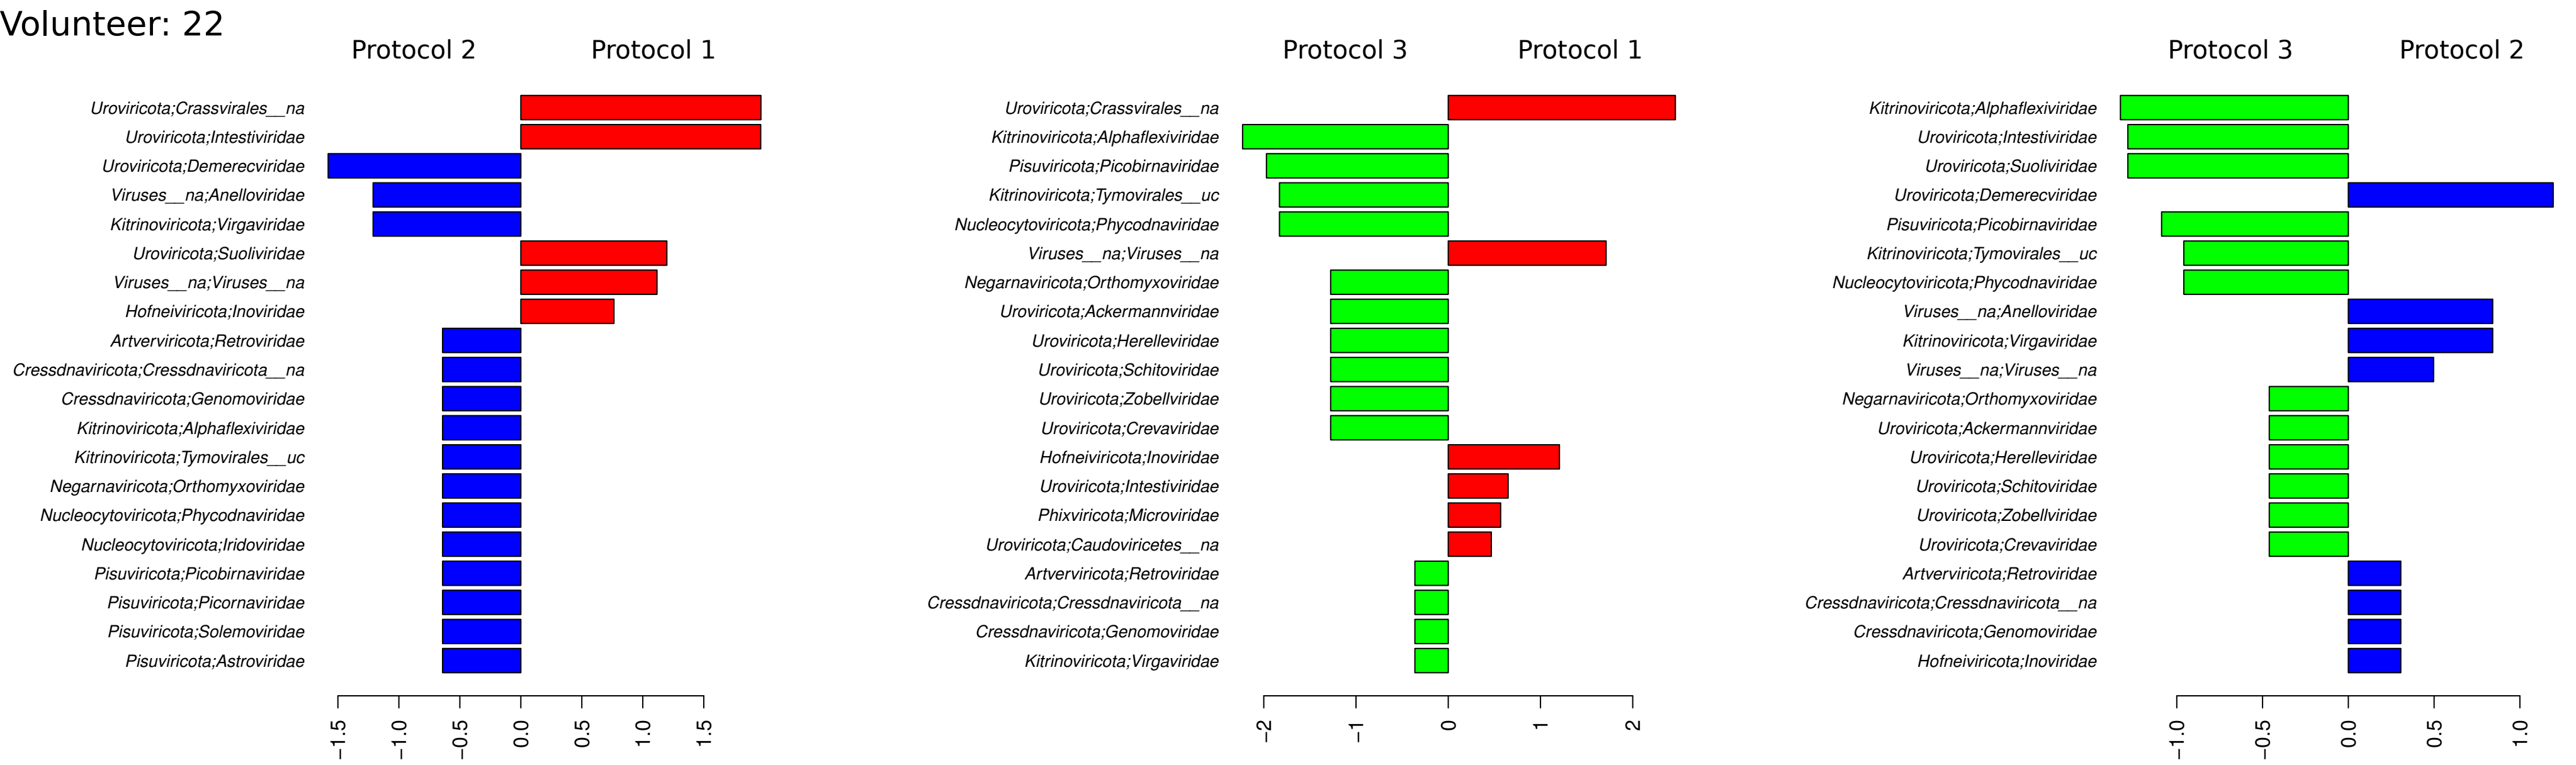

**Figure S1.** Bar graph showing the log2FC values for differences in the viral composition of each volunteer attributed to protocol variation (Protocol 1: red, Protocol 2: blue, Protocol 3: green).
